# Supplementary material for: Mercury alters endogenous phosphorylation profiles of SYK in murine B cells
Source: Springer Nature journal article supplement (doi:10.1186/s12865-017-0221-0), 2017-07-17
Supplement: MOESM1 [file 13309776]

**Additional File 1. SYK protein sequencing coverage.** These data represent results from a single anti-SYK immunoprecipitation experiment with WEHI cell extracts. The sample was digested with trypsin and analyzed by LC-MS/MS. MS2 spectral identifications were scored with Mascot and X!Tandem algorithms against forward and scrambled murine protein databases. Positive identifications were assigned below a 1% FDR threshold.

| Peptide Sequence                         | Start | Stop | Best Peptide ID Prob. | Best Sequest XCORR | Best Mascot Ion Score | Best X! Tandem -log(e) Score | Total IDs | z = +2 | z = +3 | z = +4 | Calculated Mass (AMU) |
|------------------------------------------|-------|------|-----------------------|--------------------|-----------------------|------------------------------|-----------|--------|--------|--------|-----------------------|
| AGSAVDSANHLTYFFGNITR                     | 2     | 21   | 100%                  | nd                 | nd                    | 7.57                         | 18        | 4      | 14     | 0      | 2184.04               |
| AGSAVDSANHLTYFFGNITREEAEDYLVQGGMTDGLYLLR | 2     | 41   | 100%                  | nd                 | nd                    | 8.42                         | 18        | 0      | 6      | 12     | 4453.09               |
| EEAEDYLVQGGMTDGLYLLR                     | 22    | 41   | 100%                  | 5.66               | 85.70                 | 8.17                         | 14        | 6      | 8      | 0      | 2270.06               |
| QSRNYLGGFALSVAHNR                        | 42    | 58   | 100%                  | 4.28               | 35.00                 | 1.74                         | 3         | 0      | 2      | 1      | 1889.97               |
| NYLGGFALSVAHNR                           | 45    | 58   | 100%                  | 4.36               | 107.62                | 12.00                        | 10        | 8      | 2      | 0      | 1519.77               |
| NYLGGFALSVAHNRK                          | 45    | 59   | 100%                  | 3.96               | 74.20                 | 8.59                         | 9         | 3      | 1      | 5      | 1646.88               |
| YLGGFALSVAHNR                            | 46    | 58   | 99%                   | nd                 | nd                    | 3.26                         | 1         | 0      | 1      | 0      | 1,403.74              |
| KAHHYTIERELNGTYAISGGR                    | 59    | 79   | 100%                  | 4.28               | 37.90                 | 8.72                         | 15        | 0      | 6      | 9      | 2374.19               |
| AHHYTIERELNGTYAISGGR                     | 60    | 79   | 100%                  | 3.75               | 34.50                 | 5.25                         | 9         | 2      | 4      | 3      | 2245.11               |
| ELNGTYAISGGR                             | 68    | 79   | 100%                  | 3.83               | 54.26                 | 3.49                         | 13        | 13     | 0      | 0      | 1220.59               |
| AHASPADLCHYHSQEPDGLICLLK                 | 80    | 103  | 100%                  | 4.92               | 25.20                 | 1.92                         | 12        | 0      | 2      | 10     | 2732.29               |
| KPFNRPPGVQPK                             | 104   | 115  | 100%                  | 4.32               | 37.90                 | 3.74                         | 21        | 6      | 15     | 0      | 1364.78               |
| TGPFEDLKENLIR                            | 116   | 128  | 100%                  | 3.72               | 63.48                 | 9.29                         | 20        | 8      | 12     | 0      | 1531.81               |
| TGPFEDLKENLIREYVK                        | 116   | 132  | 100%                  | 3.55               | 33.16                 | 11.00                        | 13        | 1      | 10     | 2      | 2051.08               |
| TGPFEDLKENLIREYVKQTWNLQGQALEQAIISQKPQLEK | 116   | 155  | 100%                  | nd                 | nd                    | 2.72                         | 3         | 0      | 0      | 3      | 4683.48               |
| EYVKQTWNLQGQALEQAIISQKPQLEK              | 129   | 155  | 100%                  | 6.82               | 67.60                 | 4.14                         | 11        | 0      | 6      | 5      | 3152.67               |
| QTWNLQGQALEQAIISQKPQLEK                  | 133   | 155  | 100%                  | 4.47               | 74.80                 | 10.40                        | 35        | 9      | 18     | 8      | 2651.42               |
| LIATTAHEK                                | 156   | 164  | 100%                  | 2.38               | 44.90                 | 1.92                         | 3         | 3      | 0      | 0      | 983.55                |
| LIATTAHEKMPWFHGNISR                      | 156   | 174  | 100%                  | 3.11               | 42.19                 | 4.46                         | 4         | 0      | 0      | 4      | 2,224.12              |
| LIATTAHEKMPWFHGNISRDESEQTVLIGSK          | 156   | 186  | 100%                  | 4.98               | 20.70                 | 2.64                         | 3         | 0      | 0      | 3      | 3511.76               |
| MPWFHGNISR                               | 165   | 174  | 99%                   | 2.44               | 37.45                 | 5.19                         | 3         | 0      | 3      | 0      | 1260.59               |
| MPWFHGNISRDESEQTVLIGSK                   | 165   | 186  | 100%                  | 4.43               | 25.10                 | 2.89                         | 12        | 0      | 4      | 8      | 2547.23               |
| DESEQTVLIGSK                             | 175   | 186  | 100%                  | 3.12               | 65.90                 | 5.74                         | 5         | 5      | 0      | 0      | 1305.65               |
| TNGKFLIR                                 | 187   | 194  | 100%                  | 2.05               | 62.71                 | 6.21                         | 12        | 12     | 0      | 0      | 949.55                |
| ARDNSGSYALcLLHEGK                        | 195   | 211  | 100%                  | 5.08               | 38.10                 | 3.64                         | 4         | 0      | 4      | 0      | 1890.91               |
| IDRDKTGKLSIPEGK                          | 217   | 231  | 100%                  | nd                 | nd                    | 3.96                         | 1         | 0      | 0      | 1      | 1,655.92              |
| DKTGKLSIPEGK                             | 220   | 231  | 100%                  | 2.98               | 47.59                 | 4.42                         | 2         | 1      | 1      | 0      | 1272.72               |
| TGKLSIPEGK                               | 222   | 231  | 100%                  | 2.72               | 26.00                 | 3.43                         | 2         | 2      | 0      | 0      | 1029.59               |
| LSIPEGKFDTLWQLVEHYSYKPDGLLR              | 225   | 252  | 100%                  | 3.43               | nd                    | nd                           | 1         | 0      | 0      | 1      | 3332.77               |
| KFDTLWQLVEHYSYKPDGLLR                    | 232   | 252  | 100%                  | 6.39               | 48.60                 | 6.38                         | 23        | 0      | 8      | 15     | 2608.36               |
| FDTLWQLVEHYSYKPDGLLR                     | 233   | 252  | 100%                  | 5.26               | 52.80                 | 2.92                         | 6         | 0      | 4      | 2      | 2480.26               |
| VLTVPCQK                                 | 253   | 260  | 100%                  | 1.82               | 25.12                 | 4.04                         | 1         | 1      | 0      | 0      | 944.5006              |
| IGAQMGGHPGSPNAHPVTWSPGGIISR              | 261   | 286  | 100%                  | 5.32               | 60.70                 | 8.48                         | 50        | 4      | 19     | 27     | 2640.31               |
| IKSYSFPGKPGHK                            | 287   | 298  | 100%                  | 3.95               | 44.10                 | 4.43                         | 5         | 2      | 3      | 0      | 1388.77               |
| SYSFPGKPGHK                              | 289   | 298  | 100%                  | 2.44               | 24.90                 | 2.27                         | 3         | 3      | 0      | 0      | 1147.59               |
| SYSFPGKPGHKPAPPQGSRPESTVSFNPEYPTGGPWGPDR | 289   | 328  | 100%                  | 5.55               | 16.90                 | nd                           | 1         | 0      | 0      | 1      | 4339.08               |
| KPAPPQGSRPESTVSFNPEYPTGGPWGPDR           | 299   | 328  | 100%                  | 7.41               | 69.10                 | 9.21                         | 27        | 0      | 14     | 13     | 3288.51               |
| KPAPPQGSRPESTVSFNPEYPTGGPWGPDRGLQR       | 299   | 332  | 99%                   | 5.96               | 41.20                 | 3.57                         | 7         | 0      | 0      | 7      | 3662.81               |
| EALPMDTEVYESPYADPEEIRPK                  | 333   | 355  | 100%                  | 3.97               | 43.40                 | 12.38                        | 22        | 9      | 13     | 0      | 2695.24               |
| EALPMDTEVYESPYADPEEIRKPEVYLDLR           | 333   | 361  | 100%                  | 4.43               | 70.30                 | 3.96                         | 6         | 0      | 4      | 2      | 3470.63               |
| EVYLDRLSLLTLEDNELGSGNFGTVK               | 356   | 380  | 100%                  | 5.07               | 69.10                 | 6.34                         | 6         | 1      | 5      | 0      | 2769.39               |
| EVYLDRLSLLTLEDNELGSGNFGTVKK              | 356   | 381  | 100%                  | 5.63               | 41.20                 | nd                           | 2         | 0      | 2      | 0      | 2898.47               |
| SLLTLEDNELGSGNFGTVK                      | 362   | 380  | 100%                  | 6.06               | 97.20                 | 11.50                        | 21        | 15     | 6      | 0      | 1994.99               |
| SLLTLEDNELGSGNFGTVKK                     | 362   | 381  | 100%                  | 5.58               | 91.60                 | 7.92                         | 8         | 4      | 4      | 0      | 2122.10               |
| SLLTLEDNELGSGNFGTVKKGYQMK                | 362   | 387  | 100%                  | nd                 | 23.70                 | 4.01                         | 1         | 0      | 1      | 0      | 2908.44               |
| ILKNEANDPALKDELLAEANVMQQLDNPYIVR         | 397   | 428  | 100%                  | 7.42               | 93.70                 | 9.41                         | 21        | 0      | 9      | 12     | 3638.87               |
| NEANDPALKDELLAEANVMQQLDNPYIVR            | 400   | 428  | 100%                  | 6.56               | 75.70                 | 6.42                         | 11        | 0      | 11     | 0      | 3284.61               |
| MIGICEAESWMLVMEMAELGPLNK                 | 429   | 452  | 99%                   | nd                 | 26.20                 | nd                           | 1         | 0      | 1      | 0      | 2816.27               |

|                                |     |     |      |      |       |      |    |    |   |    |          |
|--------------------------------|-----|-----|------|------|-------|------|----|----|---|----|----------|
| MIGICEAESWMLVMEMAELGPLNKYLQQNR | 429 | 458 | 100% | nd   | 90.10 | 4.37 | 2  | 0  | 2 | 0  | 3618.68  |
| HIKDKNIIELVHQVSMGMK            | 459 | 477 | 100% | 5.07 | 43.10 | 2.60 | 20 | 0  | 8 | 12 | 2252.19  |
| DKNIIELVHQVSMGMK               | 462 | 477 | 100% | 2.73 | 8.69  | 2.42 | 1  | 0  | 1 | 0  | 1873.95  |
| NIIELVHQVSMGMK                 | 464 | 477 | 100% | 2.96 | 28.50 | nd   | 1  | 1  | 0 | 0  | 1630.83  |
| YLEESNFVHR                     | 478 | 487 | 100% | 3.18 | 61.01 | 5.47 | 9  | 4  | 5 | 0  | 1293.62  |
| YLEESNFVHRDLAAR                | 478 | 492 | 100% | 3.06 | 70.84 | 7.80 | 5  | 1  | 3 | 1  | 1819.91  |
| NVLLVTQHYAK                    | 493 | 503 | 100% | 2.60 | 48.05 | 5.22 | 8  | 5  | 3 | 0  | 1285.73  |
| NVLLVTQHYAKISDFGLSK            | 493 | 511 | 100% | 3.41 | 24.10 | 3.21 | 3  | 0  | 3 | 0  | 2133.17  |
| ISDFGLSK                       | 504 | 511 | 100% | 1.73 | 54.03 | 2.72 | 1  | 1  | 0 | 0  | 865.4546 |
| ALRADENYYK                     | 512 | 521 | 100% | 3.61 | 41.00 | 4.01 | 9  | 4  | 5 | 0  | 1242.61  |
| ALRADENYYKAQTHGK               | 512 | 527 | 100% | 2.82 | 10.98 | 1.05 | 1  | 0  | 0 | 1  | 1,863.93 |
| ADENYYK                        | 515 | 521 | 99%  | 2.82 | 38.70 | 2.66 | 3  | 3  | 0 | 0  | 902.39   |
| AQTHGKWPK                      | 522 | 531 | 100% | 3.19 | 43.20 | 4.82 | 4  | 4  | 0 | 0  | 1151.63  |
| AQTHGKWPKWYAPEcINYYK           | 522 | 542 | 100% | 4.41 | 21.50 | 0.68 | 3  | 0  | 2 | 1  | 2639.29  |
| WYAPEcINYYK                    | 532 | 542 | 100% | 2.28 | 27.00 | 1.80 | 2  | 2  | 0 | 0  | 1506.67  |
| FSSKSDVWSFGVLMWEAFSYGQKPYR     | 543 | 568 | 100% | 5.83 | 39.00 | 1.05 | 4  | 0  | 0 | 4  | 3119.46  |
| SDVWSFGVLMWEAFSYGQKPYR         | 547 | 568 | 100% | 4.64 | 49.90 | 3.92 | 7  | 3  | 4 | 0  | 2670.23  |
| GMKGSEVTAMLEKGER               | 569 | 584 | 100% | 3.88 | 35.70 | 1.40 | 4  | 0  | 4 | 0  | 1754.84  |
| GSEVTAMLEK                     | 572 | 581 | 100% | 2.96 | 35.30 | 3.89 | 8  | 8  | 0 | 0  | 1080.52  |
| GSEVTAMLEKGER                  | 572 | 584 | 100% | 4.35 | 65.81 | 8.14 | 23 | 14 | 9 | 0  | 1422.69  |
| MGCPAGCPR                      | 585 | 593 | 100% | 2.90 | 47.50 | 5.42 | 2  | 2  | 0 | 0  | 1021.40  |
| EMYDLMNLCWTYDVENRPGFTAVELR     | 594 | 619 | 100% | 4.72 | 83.90 | 4.23 | 7  | 0  | 7 | 0  | 3254.46  |
| LRNYYYDVVN                     | 620 | 629 | 100% | 2.85 | 42.64 | 1.42 | 4  | 4  | 0 | 0  | 1318.64  |
| NYYYDVVN                       | 622 | 629 | 100% | 2.36 | 47.00 | 1.80 | 4  | 4  | 0 | 0  | 1049.46  |
