# Supplementary material for: Mercury alters endogenous phosphorylation profiles of SYK in murine B cells
Source: Springer Nature journal article supplement (doi:10.1186/s12865-017-0221-0), 2017-07-17
Supplement: MOESM2 [file 13309776]

**Additional File 2. Consensus SYK phosphorylation sites.** Singly, doubly or triply phosphorylated peptides were scored for peptide identification probability and modification site localization probability. Cutoff for accepted phosphosites was a localization probability of  $\geq 95\%$ . Data represent top scoring peptides.

| Phosphosite      | Peptide Sequence <sup>1</sup> | Start | Stop | Variable Modifications             | Fixed Modifications <sup>2</sup> | Localization Probability | Ascore           | Peptide Probability <sup>3</sup> | Mascot Ion Score | Sequest XCORR | X!Tandem Expect | z | Actual Mass | Observed Mass | Delta AMU |
|------------------|-------------------------------|-------|------|------------------------------------|----------------------------------|--------------------------|------------------|----------------------------------|------------------|---------------|-----------------|---|-------------|---------------|-----------|
| Y14              | aGSAVDSANHLTYFFGNITR          | 2     | 21   | n-term Acetyl, Y13 Phospho         |                                  | 100%, 100%               | 1000, 27.96      | 100%                             | nd               | nd            | 6.40E-12        | 3 | 2262.02     | 755.01        | 0.00596   |
| Y27              | EEAEDyLVQGGMTDGLYLLR          | 22    | 41   | Y6 Phospho                         |                                  | 100%                     | 168.83           | 100%                             | 55.79            | 2.996         | 1.70E-13        | 3 | 2351.05     | 784.69        | 0.00547   |
| Y46              | NyLGGFALVAHNR                 | 45    | 58   | Y2 Phospho                         |                                  | 100%                     | 294.8            | 100%                             | 94.26            | 3.784         | 8.30E-13        | 2 | 1597.74     | 799.88        | 0.00208   |
| Y63              | KAHHyTIER                     | 59    | 67   | Y5 Phospho                         |                                  | 100%                     | 27.96            | 100%                             | 37.72            | 2.033         | 4.30E-04        | 3 | 1233.56     | 412.20        | -0.00149  |
| Y73              | ELNGTyAISGGR                  | 68    | 79   | Y6 Phospho                         |                                  | 100%                     | 30.97            | 100%                             | 74.69            | 1.809         | 4.00E-06        | 2 | 1316.58     | 659.30        | 0.00070   |
| Y90              | AHASPADLcHyHSQEPDGLicLLK      | 80    | 103  | Y11 Phospho                        | C9 IAA, C21 IAA                  | 98%                      | 17.21            | 100%                             | 30.64            | 3.552         | 3.80E-06        | 4 | 2811.26     | 703.82        | 0.00594   |
| Y130             | TGPFEDLKENLIREyVK             | 116   | 132  | Y15 Phospho                        |                                  | 100%                     | 314.35           | 100%                             | 50.09            | 2.68          | 6.30E-13        | 3 | 2130.04     | 711.02        | 0.00106   |
| Y202             | ARDNSGSyAlcLLHEGK             | 195   | 211  | Y8 Phospho                         | C11 IAA                          | 100%                     | 24.95            | 99.99%                           | 18.29            | 1.423         | 5.50E-04        | 3 | 1969.87     | 657.63        | -0.00093  |
| Y243             | KFDTLWQLVEHySYKPDGLLR         | 232   | 252  | Y12 Phospho                        |                                  | 100%                     | 26.2             | 100%                             | 32.19            | 3.735         | 1.30E-08        | 4 | 2687.32     | 672.84        | 0.00848   |
| S270             | IGAQMGGHPGsPNAHPVTWSPGGIISR   | 261   | 286  | S10 Phospho                        |                                  | 100%                     | 231.99           | 100%                             | 44.58            | 6.892         | 2.10E-09        | 3 | 2703.27     | 902.10        | 0.00022   |
| S279             | IGAQMGGHPGsPNAHPVTWSPGGIISR   | 261   | 286  | S19 Phospho                        |                                  | 99%                      | 21.95            | 99.83%                           | 19.26            | 3.34          | 0.0012          | 3 | 2703.27     | 902.10        | -0.00656  |
| S270, S279       | IGAQMGGHPGsPNAHPVTWSPGGIISR   | 261   | 286  | S10 Phospho, S19 Phospho           |                                  | 100%, 98%                | 28.35, 17.99     | 99.25%                           | 25.84            | 3.157         | 0.0083          | 3 | 2783.24     | 928.7526      | -0.00469  |
| Y290             | IKSySFPKPGHK                  | 287   | 298  | Y4 Phospho                         |                                  | 100%                     | 24.95            | 100%                             | 45.32            | 3.081         | 4.40E-07        | 2 | 1467.73     | 734.87        | -0.00104  |
| S290, Y291       | IKSySFPKPGHK                  | 287   | 298  | Y4 Phospho, S5 Phospho             |                                  | 100%, 99%                | 24.95, 21.95     | 100%                             | 38.9             | 3.584         | 0.0017          | 2 | 1547.70     | 774.86        | 0.00297   |
| S289, Y290, S291 | IKSySFPKPGHK                  | 287   | 298  | S3 Phospho, Y4 Phospho, S5 Phospho |                                  | 100%, 100%, 100%         | 1000, 1000, 1000 | 100%                             | 18.71            | 2.178         | 0.019           | 3 | 1627.67     | 543.56        | 0.00513   |
| Y317             | KPAPPQGSRPSTVSFNPyEPTGGPWGPDR | 299   | 328  | Y19 Phospho                        |                                  | 100%                     | 96.95            | 100%                             | 36.53            | 5.145         | 8.80E-16        | 3 | 3287.52     | 1096.85       | 0.01340   |
| Y342             | EALPMDTEVYESPADPEEIRPK        | 333   | 355  | Y10 Phospho                        |                                  | 100%                     | 77.91            | 100%                             | 65.28            | 4.32          | 3.50E-11        | 3 | 2758.22     | 920.41        | 0.01010   |
| Y346             | EALPMDTEVYESPyADPEEIRPK       | 333   | 355  | Y14 Phospho                        |                                  | 100%                     | 53.49            | 100%                             | 50.86            | nd            | 3.00E-11        | 3 | 2758.22     | 920.41        | 0.01430   |
| Y342, Y346       | EALPMDTEVYESPADPEEIRPK        | 333   | 355  | Y10 Phospho, Y14 Phospho           |                                  | 100%, 100%               | 23.20, 53.49     | 100%                             | 41.14            | 3.265         | 7.90E-10        | 3 | 2838.21     | 947.08        | 0.03960   |
| Y358             | EVyLDR                        | 356   | 361  | Y3 Phospho                         |                                  | 100%                     | 1,000.00         | 90%                              | 23.36            | 1.592         | 0.0091          | 2 | 873.38      | 437.70        | 0.01320   |
| Y501             | NVLLVTQHyAK                   | 493   | 503  | Y9 Phospho                         |                                  | 99%                      | 20.19            | 99.99%                           | 25.17            | 2.971         | 0.0031          | 2 | 1364.69     | 683.35        | 0.00427   |
| Y519             | ALRADENyYK                    | 512   | 521  | Y8 Phospho                         |                                  | 100%                     | 58.42            | 100%                             | 37.37            | 3.131         | 2.90E-10        | 2 | 1321.57     | 661.79        | 0.00245   |
| Y520             | ALRADENyYK                    | 512   | 521  | Y9 Phospho                         |                                  | 100%                     | 51.06            | 100%                             | 40.77            | 2.897         | 4.40E-11        | 2 | 1321.57     | 661.79        | 0.00294   |
| Y519, Y520       | ALRADENyyK                    | 512   | 521  | Y8 Phospho, Y9 Phospho             |                                  | 100%, 100%               | 1000, 1000       | 100%                             | 44.13            | 2.529         | 7.00E-11        | 2 | 1401.54     | 701.78        | 0.00377   |
| Y624             | LRNyYyDyVVN                   | 620   | 629  | Y5 Phospho                         |                                  | 100%                     | 30.97            | 100%                             | 39.56            | 2.619         | 1.40E-04        | 2 | 1397.60     | 699.81        | 0.00006   |
| Y625             | LRNyYyDyVVN                   | 620   | 629  | Y6 Phospho                         |                                  | 100%                     | 27.96            | 100%                             | 45.51            | 1.857         | 4.60E-04        | 2 | 1397.60     | 699.81        | 0.00018   |
| Y624, Y625       | LRNyYyDyVVN                   | 620   | 629  | Y5 Phospho, Y6 Phospho             |                                  | 100%, 100%               | 30.97, 60.18     | 99.84%                           | 13.74            | nd            | 0.006           | 2 | 1477.59     | 739.80        | 0.02210   |

nd, not determined

<sup>1</sup>Lower case amino acid residues represent modified sites

<sup>2</sup>IAA = iodoacetamide-derived carbamidomethylation of cysteine residue

<sup>3</sup>Based on PeptideProphet algorithm
