# Supplementary material for: Mercury alters endogenous phosphorylation profiles of SYK in murine B cells
Source: Springer Nature journal article supplement (doi:10.1186/s12865-017-0221-0), 2017-07-17
Supplement: MOESM3 [file 13309776]

**Additional File 3. Identification of SYK phosphopeptides.** MS2 phosphopeptide identification information was collated from various studies on WEHI cell extracts, including anti-SYK and anti-pY immunoprecipitation experiments and titanium dioxide enrichments. Peptides were filtered to a  $\leq 1\%$  false discovery rate.

| Number | Experiment Type <sup>1</sup> | Cell Treatment <sup>2</sup> | Dosage      | Peptide Start | Peptide Stop | Peptide sequence <sup>3</sup>            | Variable modifications                         | Peptide probability | SEQUEST XCorr score | Mascot Ion score | X! Tandem -log(e) score | z | Observed m/z | Actual peptide mass (AMU) | delta mass (AMU) |
|--------|------------------------------|-----------------------------|-------------|---------------|--------------|------------------------------------------|------------------------------------------------|---------------------|---------------------|------------------|-------------------------|---|--------------|---------------------------|------------------|
| 1      | PE                           | PV                          | 30 $\mu$ M  | 2             | 21           | aGSAVDSANHLTYFFGNITR                     | n-term: Acetyl (+42.01), y13: Phospho (+79.97) | 99.70%              | 0                   | 0                | 10.5                    | 3 | 755.01       | 2,262.01                  | 0.00394          |
| 2      | PE                           | PV                          | 30 $\mu$ M  | 2             | 21           | aGSAVDSANHLTYFFGNITR                     | n-term: Acetyl (+42.01), y13: Phospho (+79.97) | 99.70%              | 0                   | 0                | 15.8                    | 3 | 755.01       | 2,262.02                  | 0.00577          |
| 3      | PE                           | PV                          | 30 $\mu$ M  | 2             | 21           | aGSAVDSANHLTYFFGNITR                     | n-term: Acetyl (+42.01), y13: Phospho (+79.97) | 99.70%              | 0                   | 0                | 6.49                    | 3 | 755.36       | 2,263.05                  | 1.04300          |
| 4      | PE                           | PV                          | 100 $\mu$ M | 2             | 21           | aGSAVDSANHLTYFFGNITR                     | n-term: Acetyl (+42.01), y13: Phospho (+79.97) | 99.70%              | 0                   | 0                | 11.2                    | 3 | 755.01       | 2,262.02                  | 0.00596          |
| 5      | PE                           | PV                          | 100 $\mu$ M | 2             | 21           | aGSAVDSANHLTYFFGNITR                     | n-term: Acetyl (+42.01), y13: Phospho (+79.97) | 99.70%              | 0                   | 0                | 9.77                    | 2 | 1132.01      | 2,262.01                  | 0.00164          |
| 6      | PE                           | PV                          | 100 $\mu$ M | 2             | 21           | aGSAVDSANHLTYFFGNITR                     | n-term: Acetyl (+42.01), y13: Phospho (+79.97) | 99.70%              | 0                   | 0                | 12                      | 3 | 755.01       | 2,262.02                  | 0.00467          |
| 7      | PE                           | PV                          | 100 $\mu$ M | 2             | 21           | aGSAVDSANHLTYFFGNITR                     | n-term: Acetyl (+42.01), y13: Phospho (+79.97) | 99.70%              | 0                   | 0                | 13.6                    | 3 | 755.01       | 2,262.01                  | 0.00248          |
| 8      | PE                           | PV                          | 100 $\mu$ M | 2             | 21           | aGSAVDSANHLTYFFGNITR                     | n-term: Acetyl (+42.01), y13: Phospho (+79.97) | 99.70%              | 0                   | 0                | 8.32                    | 2 | 1132.54      | 2,263.06                  | 1.04800          |
| 9      | PE                           | PV                          | 100 $\mu$ M | 2             | 21           | aGSAVDSANHLTYFFGNITR                     | n-term: Acetyl (+42.01), y13: Phospho (+79.97) | 99.70%              | 0                   | 0                | 8.4                     | 2 | 1132.03      | 2,262.05                  | 0.03850          |
| 10     | PE                           | PV                          | 30 $\mu$ M  | 2             | 41           | aGSAVDSANHLTYFFGNITREEAEDyLVQGGMTDGLYLLR | n-term: Acetyl (+42.01), y26: Phospho (+79.97) | 99.70%              | 0                   | 0                | 11.4                    | 4 | 1129.78      | 4,515.10                  | 0.02301          |
| 11     | PE                           | PV                          | 100 $\mu$ M | 2             | 41           | aGSAVDSANHLTYFFGNITREEAEDyLVQGGMTDGLYLLR | n-term: Acetyl (+42.01), t19: Phospho (+79.97) | 99.70%              | 0                   | 0                | 11                      | 4 | 1129.78      | 4,515.09                  | 0.01764          |
| 12     | PE                           | PV                          | 100 $\mu$ M | 2             | 41           | aGSAVDSANHLTYFFGNITREEAEDyLVQGGMTDGLYLLR | n-term: Acetyl (+42.01), y26: Phospho (+79.97) | 99.70%              | 0                   | 0                | 11.1                    | 4 | 1129.78      | 4,515.09                  | 0.01764          |
| 13     | PE                           | PV                          | 100 $\mu$ M | 2             | 41           | aGSAVDSANHLTYFFGNITREEAEDyLVQGGMTDGLYLLR | Deamidated (+0.98), y26: Phospho (+79.97)      | 99.60%              | 0                   | 0                | 6.4                     | 4 | 1130.28      | 4,517.09                  | 1.02900          |
| 14     | PE                           | PV                          | 100 $\mu$ M | 2             | 41           | aGSAVDSANHLTYFFGNITREEAEDyLVQGGMTDGLYLLR | n-term: Acetyl (+42.01), t12: Phospho (+79.97) | 99.70%              | 0                   | 0                | 11.1                    | 4 | 1129.77      | 4,515.06                  | -0.01068         |
| 15     | PE                           | PV                          | 100 $\mu$ M | 2             | 41           | aGSAVDSANHLTYFFGNITREEAEDyLVQGGMTDGLYLLR | n-term: Acetyl (+42.01), y26: Phospho (+79.97) | 99.70%              | 0                   | 0                | 12                      | 4 | 1129.78      | 4,515.08                  | 0.00436          |

|    |    |    |        |    |    |                                         |                                                |        |      |      |      |   |         |          |          |
|----|----|----|--------|----|----|-----------------------------------------|------------------------------------------------|--------|------|------|------|---|---------|----------|----------|
| 16 | PE | PV | 100 µM | 2  | 41 | aGSAVDSANHLTYFFGNItREEAEDYLQGGMTDGLYLLR | n-term: Acetyl (+42.01), t19: Phospho (+79.97) | 99.70% | 0    | 0    | 13.1 | 4 | 1129.79 | 4,515.13 | 0.05280  |
| 17 | PE | PV | 100 µM | 2  | 41 | aGSAVDSANHLTYFFGNItREEAEDYLQGGMTDGLYLLR | n-term: Acetyl (+42.01), t19: Phospho (+79.97) | 99.70% | 0    | 0    | 14   | 3 | 1506.05 | 4,515.12 | 0.04616  |
| 18 | PE | PV | 30 µM  | 22 | 41 | EEAEDyLVQGGMTDGLYLLR                    | y6: Phospho (+79.97)                           | 99.70% | 1.96 | 36.1 | 8.8  | 3 | 784.69  | 2,351.04 | 0.00363  |
| 19 | PE | PV | 100 µM | 22 | 41 | EEAEDyLVQGGMTDGLYLLR                    | y6: Phospho (+79.97)                           | 99.70% | 3    | 55.8 | 12.8 | 3 | 784.69  | 2,351.05 | 0.00546  |
| 20 | PE | PV | 100 µM | 22 | 41 | EEAEDyLVQGGMTDGLYLLR                    | y6: Phospho (+79.97)                           | 99.70% | 2.85 | 72.2 | 12.6 | 3 | 784.69  | 2,351.04 | -0.00003 |
| 21 | PE | Hg | 100 µM | 45 | 58 | NyLGGFALSVAHNR                          | y2: Phospho (+79.97)                           | 99.70% | 2.8  | 19.7 | 1.04 | 2 | 799.88  | 1,597.75 | 0.00721  |
| 22 | PE | PV | 30 µM  | 45 | 58 | NyLGGFALSVAHNR                          | y2: Phospho (+79.97)                           | 99.70% | 1.77 | 31.4 | 1.19 | 2 | 799.88  | 1,597.75 | 0.00562  |
| 23 | PE | PV | 30 µM  | 45 | 58 | NyLGGFALSVAHNR                          | y2: Phospho (+79.97)                           | 99.70% | 1.92 | 27   | 0    | 2 | 799.88  | 1,597.74 | 0.00306  |
| 24 | PE | PV | 30 µM  | 45 | 58 | NyLGGFALSVAHNR                          | y2: Phospho (+79.97)                           | 98.10% | 0.8  | 14.2 | 1.29 | 2 | 799.88  | 1,597.74 | 0.00281  |
| 25 | PE | PV | 30 µM  | 45 | 58 | NyLGGFALSVAHNR                          | y2: Phospho (+79.97)                           | 99.70% | 3.29 | 73.8 | 11.5 | 2 | 799.88  | 1,597.74 | 0.00245  |
| 26 | PE | PV | 30 µM  | 45 | 58 | NyLGGFALSVAHNR                          | y2: Phospho (+79.97)                           | 99.70% | 3.41 | 78   | 10.5 | 2 | 799.88  | 1,597.74 | 0.00391  |
| 27 | PE | PV | 30 µM  | 45 | 58 | NyLGGFALSVAHNR                          | y2: Phospho (+79.97)                           | 99.70% | 1.87 | 82.9 | 4.07 | 2 | 799.88  | 1,597.74 | -0.00195 |
| 28 | PE | PV | 30 µM  | 45 | 58 | NyLGGFALSVAHNR                          | y2: Phospho (+79.97)                           | 99.70% | 2.34 | 103  | 8.37 | 2 | 799.88  | 1,597.74 | 0.00404  |
| 29 | PE | PV | 30 µM  | 45 | 58 | NyLGGFALSVAHNR                          | y2: Phospho (+79.97)                           | 99.70% | 1.62 | 30.8 | 4.15 | 3 | 533.59  | 1,597.76 | 0.02215  |
| 30 | PE | PV | 30 µM  | 45 | 58 | NyLGGFALSVAHNR                          | y2: Phospho (+79.97)                           | 99.70% | 1.99 | 74.3 | 9.52 | 2 | 799.89  | 1,597.76 | 0.02210  |
| 31 | PE | PV | 30 µM  | 45 | 58 | NyLGGFALSVAHNR                          | y2: Phospho (+79.97)                           | 99.70% | 2.37 | 56.1 | 10.7 | 2 | 799.89  | 1,597.76 | 0.02125  |
| 32 | PE | PV | 30 µM  | 45 | 58 | NyLGGFALSVAHNR                          | y2: Phospho (+79.97)                           | 99.70% | 1.65 | 36.9 | 5.48 | 3 | 533.59  | 1,597.76 | 0.02270  |
| 33 | PE | PV | 30 µM  | 45 | 58 | NyLGGFALSVAHNR                          | y2: Phospho (+79.97)                           | 99.70% | 2.55 | 37.6 | 4.92 | 3 | 533.60  | 1,597.76 | 0.02325  |
| 34 | PE | PV | 30 µM  | 45 | 58 | NyLGGFALSVAHNR                          | y2: Phospho (+79.97)                           | 99.20% | 0.78 | 12.8 | 0    | 2 | 799.88  | 1,597.74 | 0.00269  |
| 35 | PE | PV | 30 µM  | 45 | 58 | NyLGGFALSVAHNR                          | y2: Phospho (+79.97)                           | 99.70% | 2.46 | 87.4 | 15.2 | 2 | 799.88  | 1,597.74 | 0.00037  |
| 36 | PE | PV | 30 µM  | 45 | 58 | NyLGGFALSVAHNR                          | y2: Phospho (+79.97)                           | 99.70% | 2.35 | 39.8 | 6.35 | 3 | 533.59  | 1,597.75 | 0.00494  |
| 37 | PE | PV | 100 µM | 45 | 58 | NyLGGFALSVAHNR                          | y2: Phospho (+79.97)                           | 81.60% | 2.2  | 0    | 0    | 2 | 799.88  | 1,597.74 | -0.00134 |
| 38 | PE | PV | 100 µM | 45 | 58 | NyLGGFALSVAHNR                          | y2: Phospho (+79.97)                           | 99.70% | 2.44 | 31.2 | 0    | 2 | 799.88  | 1,597.74 | 0.00330  |
| 39 | PE | PV | 100 µM | 45 | 58 | NyLGGFALSVAHNR                          | y2: Phospho (+79.97)                           | 99.70% | 2.23 | 38   | 1.09 | 2 | 799.88  | 1,597.74 | 0.00172  |
| 40 | PE | PV | 100 µM | 45 | 58 | NyLGGFALSVAHNR                          | y2: Phospho (+79.97)                           | 99.70% | 2.11 | 22.9 | 3.17 | 3 | 533.59  | 1,597.74 | 0.00311  |
| 41 | PE | PV | 100 µM | 45 | 58 | NyLGGFALSVAHNR                          | y2: Phospho (+79.97)                           | 99.70% | 2.13 | 84.5 | 14.9 | 2 | 799.88  | 1,597.74 | 0.00184  |
| 42 | PE | PV | 100 µM | 45 | 58 | NyLGGFALSVAHNR                          | y2: Phospho (+79.97)                           | 99.70% | 1.76 | 29.5 | 4.96 | 2 | 799.88  | 1,597.74 | -0.00073 |
| 43 | PE | PV | 100 µM | 45 | 58 | NyLGGFALSVAHNR                          | y2: Phospho (+79.97)                           | 99.70% | 3.49 | 84.9 | 12.3 | 2 | 799.88  | 1,597.75 | 0.00501  |
| 44 | PE | PV | 100 µM | 45 | 58 | NyLGGFALSVAHNR                          | y2: Phospho (+79.97)                           | 99.70% | 3.78 | 94.3 | 12.1 | 2 | 799.88  | 1,597.74 | 0.00208  |
| 45 | PE | PV | 100 µM | 45 | 58 | NyLGGFALSVAHNR                          | y2: Phospho (+79.97)                           | 99.70% | 3.99 | 89.2 | 11.4 | 2 | 799.88  | 1,597.74 | 0.00343  |
| 46 | PE | PV | 100 µM | 45 | 58 | NyLGGFALSVAHNR                          | y2: Phospho (+79.97)                           | 99.70% | 3.5  | 59.6 | 7.7  | 3 | 533.59  | 1,597.74 | 0.00329  |
| 47 | PE | PV | 100 µM | 45 | 58 | NyLGGFALSVAHNR                          | y2: Phospho (+79.97)                           | 99.70% | 3.89 | 59.3 | 7.21 | 3 | 533.59  | 1,597.75 | 0.00530  |
| 48 | PE | PV | 100 µM | 45 | 58 | NyLGGFALSVAHNR                          | y2: Phospho (+79.97)                           | 99.70% | 2.57 | 113  | 8.27 | 2 | 799.88  | 1,597.74 | -0.00341 |
| 49 | PE | PV | 100 µM | 45 | 58 | NyLGGFALSVAHNR                          | y2: Phospho (+79.97)                           | 99.70% | 1.2  | 21.9 | 1.15 | 3 | 533.59  | 1,597.74 | 0.00128  |
| 50 | PE | PV | 100 µM | 45 | 58 | NyLGGFALSVAHNR                          | y2: Phospho (+79.97)                           | 99.70% | 1.42 | 31.6 | 1.23 | 3 | 533.59  | 1,597.74 | 0.00182  |
| 51 | PE | PV | 100 µM | 45 | 58 | NyLGGFALSVAHNR                          | y2: Phospho (+79.97)                           | 99.70% | 2.74 | 99.1 | 15.4 | 2 | 799.88  | 1,597.74 | 0.00233  |
| 52 | PE | PV | 100 µM | 45 | 58 | NyLGGFALSVAHNR                          | y2: Phospho (+79.97)                           | 99.70% | 2.89 | 110  | 8.37 | 2 | 799.88  | 1,597.74 | 0.00233  |
| 53 | PE | PV | 100 µM | 45 | 58 | NyLGGFALSVAHNR                          | y2: Phospho (+79.97)                           | 99.70% | 3.04 | 99   | 16.2 | 2 | 799.88  | 1,597.74 | 0.00025  |
| 54 | PE | PV | 100 µM | 45 | 58 | NyLGGFALSVAHNR                          | y2: Phospho (+79.97)                           | 99.70% | 3.03 | 70   | 13.2 | 2 | 799.88  | 1,597.74 | -0.00305 |
| 55 | PE | PV | 100 µM | 45 | 58 | NyLGGFALSVAHNR                          | y2: Phospho (+79.97)                           | 99.70% | 1.85 | 36.3 | 4.41 | 3 | 533.59  | 1,597.74 | 0.00128  |
| 56 | PE | PV | 100 µM | 45 | 58 | NyLGGFALSVAHNR                          | y2: Phospho (+79.97)                           | 99.70% | 2.51 | 89.1 | 8.25 | 2 | 799.88  | 1,597.74 | 0.00281  |
| 57 | PE | PV | 100 µM | 45 | 58 | NyLGGFALSVAHNR                          | y2: Phospho (+79.97)                           | 99.70% | 3.13 | 108  | 13.1 | 2 | 799.88  | 1,597.75 | 0.00574  |
| 58 | PE | PV | 100 µM | 45 | 58 | NyLGGFALSVAHNR                          | y2: Phospho (+79.97)                           | 99.70% | 2.27 | 31.1 | 3.74 | 3 | 533.60  | 1,597.76 | 0.02361  |

|     |    |    |        |    |    |                 |                                              |        |      |      |      |   |        |          |          |
|-----|----|----|--------|----|----|-----------------|----------------------------------------------|--------|------|------|------|---|--------|----------|----------|
| 59  | PE | PV | 100 µM | 45 | 58 | NyLGGFALSVAHNR  | y2: Phospho (+79.97)                         | 99.70% | 2.08 | 31   | 4.07 | 3 | 533.59 | 1,597.76 | 0.02288  |
| 60  | PE | PV | 100 µM | 45 | 58 | NyLGGFALSVAHNR  | y2: Phospho (+79.97)                         | 99.70% | 2.56 | 31.6 | 5.74 | 3 | 533.59 | 1,597.76 | 0.02142  |
| 61  | PE | PV | 100 µM | 45 | 58 | NyLGGFALSVAHNR  | y2: Phospho (+79.97)                         | 99.70% | 2.62 | 40.6 | 6.37 | 3 | 533.59 | 1,597.76 | 0.02197  |
| 62  | PE | PV | 100 µM | 45 | 58 | NyLGGFALSVAHNR  | y2: Phospho (+79.97)                         | 99.70% | 2.24 | 54.7 | 11.2 | 2 | 799.89 | 1,597.76 | 0.02076  |
| 63  | PE | PV | 100 µM | 45 | 58 | NyLGGFALSVAHNR  | y2: Phospho (+79.97)                         | 99.70% | 2.22 | 76.7 | 10.1 | 2 | 799.89 | 1,597.76 | 0.02296  |
| 64  | PE | PV | 100 µM | 45 | 58 | NyLGGFALSVAHNR  | y2: Phospho (+79.97)                         | 99.70% | 2.33 | 67.8 | 10.1 | 2 | 799.89 | 1,597.76 | 0.02430  |
| 65  | PE | PV | 100 µM | 45 | 58 | NyLGGFALSVAHNR  | y2: Phospho (+79.97)                         | 99.70% | 2.56 | 70.4 | 8.7  | 2 | 799.89 | 1,597.76 | 0.02393  |
| 66  | PE | PV | 100 µM | 45 | 58 | NyLGGFALSVAHNR  | y2: Phospho (+79.97)                         | 99.70% | 3.03 | 65.4 | 9    | 2 | 799.89 | 1,597.76 | 0.02296  |
| 67  | PE | PV | 100 µM | 45 | 58 | NyLGGFALSVAHNR  | y2: Phospho (+79.97)                         | 99.70% | 2.56 | 47   | 6.3  | 3 | 533.59 | 1,597.76 | 0.02288  |
| 68  | PE | PV | 100 µM | 45 | 58 | NyLGGFALSVAHNR  | y2: Phospho (+79.97)                         | 99.70% | 2.72 | 50.9 | 5.54 | 3 | 533.59 | 1,597.76 | 0.02233  |
| 69  | PE | PV | 100 µM | 45 | 58 | NyLGGFALSVAHNR  | y2: Phospho (+79.97)                         | 99.50% | 0.74 | 17.4 | 1.11 | 2 | 799.88 | 1,597.74 | -0.00085 |
| 70  | PE | PV | 100 µM | 45 | 58 | NyLGGFALSVAHNR  | y2: Phospho (+79.97)                         | 99.70% | 1.34 | 50.5 | 3.49 | 2 | 799.88 | 1,597.75 | 0.00672  |
| 71  | PE | PV | 100 µM | 45 | 58 | NyLGGFALSVAHNR  | y2: Phospho (+79.97)                         | 99.70% | 2.66 | 77.2 | 12.7 | 2 | 799.88 | 1,597.74 | 0.00013  |
| 72  | PE | PV | 100 µM | 45 | 58 | NyLGGFALSVAHNR  | y2: Phospho (+79.97)                         | 99.70% | 2.64 | 37   | 8.26 | 3 | 533.59 | 1,597.74 | 0.00054  |
| 73  | PE | PV | 100 µM | 45 | 59 | NyLGGFALSVAHNRK | y2: Phospho (+79.97)                         | 99.70% | 3.33 | 26.5 | 5.31 | 3 | 576.29 | 1,725.84 | 0.00485  |
| 74  | PE | PV | 100 µM | 45 | 59 | NyLGGFALSVAHNRK | y2: Phospho (+79.97)                         | 99.70% | 3.68 | 33.2 | 6.37 | 3 | 576.29 | 1,725.84 | 0.00393  |
| 75  | PE | PV | 100 µM | 45 | 59 | NyLGGFALSVAHNRK | y2: Phospho (+79.97)                         | 99.70% | 2.33 | 28.2 | 5.47 | 3 | 576.29 | 1,725.83 | -0.00028 |
| 76  | PE | PV | 30 µM  | 59 | 67 | KAHHyTIER       | y5: Phospho (+79.97)                         | 99.20% | 0.93 | 16.6 | 0    | 3 | 412.20 | 1,233.56 | -0.00085 |
| 77  | PE | PV | 30 µM  | 59 | 67 | KAHHyTIER       | y5: Phospho (+79.97)                         | 99.70% | 2.6  | 22   | 2.77 | 3 | 412.20 | 1,233.56 | -0.00122 |
| 78  | PE | PV | 100 µM | 59 | 67 | KAHHyTIER       | y5: Phospho (+79.97)                         | 99.70% | 2.15 | 28.7 | 2.82 | 3 | 412.20 | 1,233.57 | 0.00180  |
| 79  | PE | PV | 100 µM | 59 | 67 | KAHHyTIER       | y5: Phospho (+79.97)                         | 99.70% | 2.06 | 18.8 | 3    | 3 | 412.20 | 1,233.57 | 0.00061  |
| 80  | PE | PV | 100 µM | 59 | 67 | KAHHyTIER       | y5: Phospho (+79.97)                         | 99.70% | 2.03 | 37.7 | 3.37 | 3 | 412.20 | 1,233.56 | -0.00149 |
| 81  | PE | PV | 100 µM | 59 | 67 | KAHHyTIER       | y5: Phospho (+79.97)                         | 99.70% | 2.18 | 22.2 | 2.96 | 3 | 412.20 | 1,233.56 | -0.00140 |
| 82  | PE | PV | 100 µM | 59 | 67 | KAHHyTIER       | y5: Phospho (+79.97)                         | 99.70% | 3.08 | 16.1 | 3.14 | 3 | 412.20 | 1,233.56 | -0.00122 |
| 83  | PE | PV | 100 µM | 59 | 67 | KAHHyTIER       | y5: Phospho (+79.97)                         | 99.70% | 2.13 | 30.7 | 2.34 | 3 | 412.20 | 1,233.56 | -0.00113 |
| 84  | PE | Hg | 50 µM  | 68 | 79 | ELNGTyAISGGR    | y6: Phospho (+79.97)                         | 99.70% | 2.71 | 33.2 | 4    | 2 | 659.30 | 1,316.58 | 0.00241  |
| 85  | PE | Hg | 50 µM  | 68 | 79 | ELNGTyAISGGR    | y6: Phospho (+79.97)                         | 99.70% | 1.35 | 52.4 | 2.14 | 2 | 659.29 | 1,316.58 | -0.00101 |
| 86  | PE | Hg | 50 µM  | 68 | 79 | ELNGTyAISGGR    | y6: Phospho (+79.97)                         | 99.70% | 1.81 | 74.7 | 5.4  | 2 | 659.30 | 1,316.58 | 0.00070  |
| 87  | PE | Hg | 50 µM  | 68 | 79 | ELNGTyAISGGR    | y6: Phospho (+79.97)                         | 99.70% | 2.84 | 51.1 | 7.4  | 2 | 659.30 | 1,316.58 | 0.00082  |
| 88  | PE | Hg | 50 µM  | 68 | 79 | ELNGTyAISGGR    | y6: Phospho (+79.97)                         | 99.70% | 3.14 | 51.2 | 7.39 | 2 | 659.30 | 1,316.58 | 0.00009  |
| 89  | PE | Hg | 50 µM  | 68 | 79 | ELnGtY AISGGR   | n3: Deamidated (+0.98), t5: Phospho (+79.97) | 99.60% | 0.98 | 27.7 | 0    | 2 | 659.79 | 1,317.56 | 0.00374  |
| 90  | PE | Hg | 50 µM  | 68 | 79 | ELNGTyAISGGR    | y6: Phospho (+79.97)                         | 99.70% | 1.51 | 57.2 | 3.06 | 2 | 659.30 | 1,316.58 | 0.00631  |
| 91  | PE | Hg | 50 µM  | 68 | 79 | ELNGTyAISGGR    | y6: Phospho (+79.97)                         | 99.70% | 2.96 | 66.7 | 5.33 | 2 | 659.30 | 1,316.58 | 0.00436  |
| 92  | PE | Hg | 50 µM  | 68 | 79 | ELNGTyAISGGR    | t5: Phospho (+79.97)                         | 99.70% | 2.57 | 37.7 | 5.82 | 2 | 659.31 | 1,316.60 | 0.01938  |
| 93  | PE | Hg | 50 µM  | 68 | 79 | ELNGTyAISGGR    | y6: Phospho (+79.97)                         | 99.70% | 2.45 | 42   | 5.64 | 2 | 659.30 | 1,316.59 | 0.01571  |
| 94  | PE | Hg | 50 µM  | 68 | 79 | ELNGTyAISGGR    | t5: Phospho (+79.97)                         | 99.70% | 2.45 | 58.1 | 6.21 | 2 | 659.30 | 1,316.59 | 0.01803  |
| 95  | PE | Hg | 100 µM | 68 | 79 | ELnGtY AISGGR   | n3: Deamidated (+0.98), y6: Phospho (+79.97) | 98.90% | 2.3  | 28.3 | 0    | 2 | 659.79 | 1,317.57 | 0.00631  |
| 96  | PE | Hg | 100 µM | 68 | 79 | ELNGTyAISGGR    | t5: Phospho (+79.97)                         | 99.50% | 2.15 | 0    | 1.03 | 2 | 659.30 | 1,316.58 | 0.00448  |
| 97  | PE | Hg | 100 µM | 68 | 79 | ELNGTyAISGGR    | y6: Phospho (+79.97)                         | 99.70% | 3.47 | 26.3 | 1.46 | 2 | 659.30 | 1,316.58 | 0.00216  |
| 98  | PE | Hg | 100 µM | 68 | 79 | ELNGTyAISGGR    | y6: Phospho (+79.97)                         | 99.70% | 3.06 | 54.3 | 4.92 | 2 | 659.30 | 1,316.58 | 0.00473  |
| 99  | PE | Hg | 100 µM | 68 | 79 | ELNGTyAISGGR    | t5: Phospho (+79.97)                         | 95.00% | 0.95 | 34.1 | 1.23 | 2 | 659.30 | 1,316.58 | 0.00058  |
| 100 | PE | Hg | 100 µM | 68 | 79 | ELNGTyAISGGR    | y6: Phospho (+79.97)                         | 97.80% | 1.27 | 63.1 | 0.77 | 2 | 659.30 | 1,316.58 | 0.00058  |

|     |    |    |        |    |    |               |                                              |        |      |      |      |   |        |          |          |
|-----|----|----|--------|----|----|---------------|----------------------------------------------|--------|------|------|------|---|--------|----------|----------|
| 101 | PE | Hg | 100 µM | 68 | 79 | ELnGTyAISGGR  | n3: Deamidated (+0.98), y6: Phospho (+79.97) | 98.70% | 1.06 | 63.5 | 1.54 | 2 | 659.79 | 1,317.56 | -0.00102 |
| 102 | PE | Hg | 100 µM | 68 | 79 | ELnGTyAISGGR  | n3: Deamidated (+0.98), y6: Phospho (+79.97) | 99.10% | 1.38 | 65.4 | 2.17 | 2 | 659.79 | 1,317.56 | 0.00118  |
| 103 | PE | Hg | 100 µM | 68 | 79 | ELNGTyAISGGR  | y6: Phospho (+79.97)                         | 99.70% | 1.78 | 78.4 | 2.57 | 2 | 659.30 | 1,316.58 | 0.00168  |
| 104 | PE | Hg | 100 µM | 68 | 79 | ELNGTyAISGGR  | y6: Phospho (+79.97)                         | 99.70% | 2.27 | 60.4 | 4.55 | 2 | 659.30 | 1,316.58 | -0.00016 |
| 105 | PE | Hg | 100 µM | 68 | 79 | ELNGTyAISGGR  | y6: Phospho (+79.97)                         | 99.70% | 1.9  | 67.3 | 6.11 | 2 | 659.30 | 1,316.58 | 0.00229  |
| 106 | PE | Hg | 100 µM | 68 | 79 | ELNGTyAISGGR  | y6: Phospho (+79.97)                         | 99.70% | 2.93 | 66.7 | 5.72 | 2 | 659.30 | 1,316.58 | 0.00216  |
| 107 | PE | Hg | 100 µM | 68 | 79 | ELNGTyAISGGR  | y6: Phospho (+79.97)                         | 99.70% | 0    | 49.5 | 6.47 | 2 | 659.30 | 1,316.58 | 0.00436  |
| 108 | PE | Hg | 100 µM | 68 | 79 | ELNGTyAISGGR  | y6: Phospho (+79.97)                         | 99.70% | 0    | 50   | 7.15 | 2 | 659.30 | 1,316.58 | 0.00546  |
| 109 | PE | Hg | 100 µM | 68 | 79 | ELNGTyAISGGR  | y6: Phospho (+79.97)                         | 99.70% | 0    | 49.6 | 7.28 | 2 | 659.30 | 1,316.58 | 0.00326  |
| 110 | PE | Hg | 100 µM | 68 | 79 | ELnGTyAISGGR  | n3: Deamidated (+0.98), y6: Phospho (+79.97) | 99.70% | 1.61 | 62.4 | 2.92 | 2 | 659.79 | 1,317.56 | -0.00248 |
| 111 | PE | Hg | 100 µM | 68 | 79 | ELNGTyAISGGR  | y6: Phospho (+79.97)                         | 99.70% | 2.4  | 56.9 | 4.08 | 2 | 659.29 | 1,316.57 | -0.00333 |
| 112 | PE | Hg | 100 µM | 68 | 79 | ELNGTyAISGGR  | y6: Phospho (+79.97)                         | 99.70% | 3.26 | 42.7 | 5.74 | 2 | 659.30 | 1,316.58 | -0.00016 |
| 113 | PE | Hg | 100 µM | 68 | 79 | ELNGTyAISGGR  | y6: Phospho (+79.97)                         | 99.70% | 3.25 | 41.7 | 6.33 | 2 | 659.29 | 1,316.57 | -0.00138 |
| 114 | PE | Hg | 100 µM | 68 | 79 | ELNGTyAISGGR  | y6: Phospho (+79.97)                         | 99.70% | 3.19 | 50   | 7.96 | 2 | 659.30 | 1,316.58 | 0.00094  |
| 115 | PE | Hg | 100 µM | 68 | 79 | ELnGtY AISGGR | n3: Deamidated (+0.98), t5: Phospho (+79.97) | 97.10% | 0.97 | 18.5 | 0    | 2 | 659.79 | 1,317.56 | 0.00155  |
| 116 | PE | Hg | 100 µM | 68 | 79 | ELNGTyAISGGR  | y6: Phospho (+79.97)                         | 99.70% | 1.46 | 56   | 2.08 | 2 | 659.30 | 1,316.58 | 0.00448  |
| 117 | PE | Hg | 100 µM | 68 | 79 | ELNGTyAISGGR  | y6: Phospho (+79.97)                         | 99.70% | 3.33 | 53   | 4.82 | 2 | 659.30 | 1,316.58 | 0.00595  |
| 118 | PE | Hg | 100 µM | 68 | 79 | ELNGtY AISGGR | t5: Phospho (+79.97)                         | 99.70% | 2.26 | 26.6 | 5.89 | 2 | 659.30 | 1,316.59 | 0.01779  |
| 119 | PE | PV | 1 µM   | 68 | 79 | ELNGtY AISGGR | t5: Phospho (+79.97)                         | 83.00% | 0.25 | 0    | 0    | 2 | 659.29 | 1,316.57 | -0.00443 |
| 120 | PE | PV | 10 µM  | 68 | 79 | ELNGTyAISGGR  | y6: Phospho (+79.97)                         | 94.70% | 1.8  | 12.7 | 0    | 2 | 659.30 | 1,316.58 | 0.00387  |
| 121 | PE | PV | 10 µM  | 68 | 79 | ELNGTyAISGGR  | y6: Phospho (+79.97)                         | 99.70% | 1.19 | 44.2 | 2.05 | 2 | 659.30 | 1,316.58 | 0.00168  |
| 122 | PE | PV | 30 µM  | 68 | 79 | ELNGTyAISGGR  | y6: Phospho (+79.97)                         | 97.60% | 1.27 | 15.6 | 0    | 2 | 659.30 | 1,316.58 | 0.00851  |
| 123 | PE | PV | 30 µM  | 68 | 79 | ELNGTyAISGGR  | y6: Phospho (+79.97)                         | 99.30% | 2.81 | 26.2 | 1.48 | 2 | 659.30 | 1,316.58 | 0.00680  |
| 124 | PE | PV | 30 µM  | 68 | 79 | ELNGTyAISGGR  | y6: Phospho (+79.97)                         | 99.70% | 2.59 | 38.4 | 2.01 | 2 | 659.30 | 1,316.58 | 0.00546  |
| 125 | PE | PV | 30 µM  | 68 | 79 | ELNGTyAISGGR  | y6: Phospho (+79.97)                         | 99.70% | 2.51 | 33.1 | 1.52 | 2 | 659.29 | 1,316.58 | -0.00089 |
| 126 | PE | PV | 30 µM  | 68 | 79 | ELNGTyAISGGR  | y6: Phospho (+79.97)                         | 99.50% | 1.7  | 61.7 | 1.37 | 2 | 659.30 | 1,316.58 | 0.00290  |
| 127 | PE | PV | 30 µM  | 68 | 79 | ELNGTyAISGGR  | y6: Phospho (+79.97)                         | 99.70% | 2.21 | 62.4 | 2.62 | 2 | 659.30 | 1,316.58 | 0.00497  |
| 128 | PE | PV | 30 µM  | 68 | 79 | ELnGTyAISGGR  | n3: Deamidated (+0.98), y6: Phospho (+79.97) | 99.70% | 1.44 | 58.3 | 3.28 | 2 | 659.79 | 1,317.56 | -0.00114 |
| 129 | PE | PV | 30 µM  | 68 | 79 | ELnGTyAISGGR  | n3: Deamidated (+0.98), y6: Phospho (+79.97) | 99.70% | 2.51 | 66.1 | 5.89 | 2 | 659.79 | 1,317.56 | -0.00297 |
| 130 | PE | PV | 30 µM  | 68 | 79 | ELNGTyAISGGR  | y6: Phospho (+79.97)                         | 99.70% | 2.83 | 71.7 | 5.72 | 2 | 659.30 | 1,316.58 | 0.00277  |
| 131 | PE | PV | 30 µM  | 68 | 79 | ELNGTyAISGGR  | y6: Phospho (+79.97)                         | 99.70% | 1.78 | 31.9 | 2.7  | 2 | 659.30 | 1,316.58 | 0.00314  |
| 132 | PE | PV | 30 µM  | 68 | 79 | ELnGTyAISGGR  | n3: Deamidated (+0.98), y6: Phospho (+79.97) | 99.70% | 2.94 | 44.7 | 4.92 | 2 | 659.79 | 1,317.57 | 0.00472  |
| 133 | PE | PV | 30 µM  | 68 | 79 | ELNGTyAISGGR  | y6: Phospho (+79.97)                         | 99.70% | 3    | 34.7 | 6.02 | 2 | 659.30 | 1,316.58 | 0.00338  |
| 134 | PE | PV | 30 µM  | 68 | 79 | ELNGTyAISGGR  | y6: Phospho (+79.97)                         | 99.70% | 3.16 | 49.6 | 7.74 | 2 | 659.30 | 1,316.58 | 0.00387  |
| 135 | PE | PV | 30 µM  | 68 | 79 | ELNGTyAISGGR  | y6: Phospho (+79.97)                         | 99.70% | 3.43 | 48.3 | 8.18 | 2 | 659.30 | 1,316.58 | 0.00326  |
| 136 | PE | PV | 30 µM  | 68 | 79 | ELNGTyAISGGR  | y6: Phospho (+79.97)                         | 99.70% | 3.4  | 50.3 | 7.13 | 2 | 659.30 | 1,316.58 | 0.00363  |
| 137 | PE | PV | 30 µM  | 68 | 79 | ELnGTyAISGGR  | n3: Deamidated (+0.98), y6: Phospho (+79.97) | 99.70% | 1.3  | 69.4 | 3.48 | 2 | 659.79 | 1,317.56 | 0.00094  |

|     |    |    |        |    |    |               |                                              |        |      |      |      |   |        |          |          |
|-----|----|----|--------|----|----|---------------|----------------------------------------------|--------|------|------|------|---|--------|----------|----------|
| 138 | PE | PV | 30 μM  | 68 | 79 | ELNGTyAISGGR  | y6: Phospho (+79.97)                         | 99.70% | 2.73 | 57   | 5.08 | 2 | 659.29 | 1,316.58 | -0.00101 |
| 139 | PE | PV | 30 μM  | 68 | 79 | ELNGTyAISGGR  | y6: Phospho (+79.97)                         | 99.70% | 2.74 | 52.3 | 4.06 | 2 | 659.29 | 1,316.58 | -0.00126 |
| 140 | PE | PV | 30 μM  | 68 | 79 | ELNGTyAISGGR  | y6: Phospho (+79.97)                         | 99.70% | 2.95 | 51.3 | 4.25 | 2 | 659.30 | 1,316.58 | 0.00351  |
| 141 | PE | PV | 30 μM  | 68 | 79 | ELNGTyAISGGR  | y6: Phospho (+79.97)                         | 99.70% | 3.42 | 49.7 | 7.64 | 2 | 659.30 | 1,316.58 | 0.00058  |
| 142 | PE | PV | 30 μM  | 68 | 79 | ELNGTyAISGGR  | y6: Phospho (+79.97)                         | 99.70% | 3.41 | 49.9 | 5.44 | 2 | 659.29 | 1,316.58 | -0.00101 |
| 143 | PE | PV | 30 μM  | 68 | 79 | ELNGTyAISGGR  | y6: Phospho (+79.97)                         | 99.70% | 3.06 | 66.6 | 5.64 | 2 | 659.30 | 1,316.58 | 0.00424  |
| 144 | PE | PV | 30 μM  | 68 | 79 | ELNGTyAISGGR  | y6: Phospho (+79.97)                         | 99.70% | 2.67 | 36.9 | 4.89 | 2 | 659.30 | 1,316.60 | 0.01901  |
| 145 | PE | PV | 30 μM  | 68 | 79 | ELNGTyAISGGR  | y6: Phospho (+79.97)                         | 99.70% | 2.39 | 39.1 | 5.55 | 2 | 659.30 | 1,316.59 | 0.01791  |
| 146 | PE | PV | 30 μM  | 68 | 79 | ELNGTyAISGGR  | y6: Phospho (+79.97)                         | 99.70% | 2.24 | 39.6 | 6.27 | 2 | 659.30 | 1,316.59 | 0.01779  |
| 147 | PE | PV | 30 μM  | 68 | 79 | ELNGTyAISGGR  | y6: Phospho (+79.97)                         | 99.70% | 2.12 | 28.2 | 3.72 | 2 | 659.30 | 1,316.58 | 0.00619  |
| 148 | PE | PV | 30 μM  | 68 | 79 | ELNGTyAISGGR  | y6: Phospho (+79.97)                         | 99.70% | 2.64 | 57.6 | 5.52 | 2 | 659.30 | 1,316.58 | 0.00107  |
| 149 | PE | PV | 100 μM | 68 | 79 | ELNGTyAISGGR  | y6: Phospho (+79.97)                         | 89.60% | 2.79 | 0    | 0    | 2 | 659.30 | 1,316.58 | 0.00314  |
| 150 | PE | PV | 100 μM | 68 | 79 | ELNGTyAISGGR  | y6: Phospho (+79.97)                         | 98.70% | 1.85 | 13.4 | 0.89 | 2 | 659.30 | 1,316.58 | 0.00326  |
| 151 | PE | PV | 100 μM | 68 | 79 | ELnGTyAISGGR  | n3: Deamidated (+0.98), y6: Phospho (+79.97) | 99.70% | 2.15 | 34   | 1.05 | 2 | 659.79 | 1,317.56 | 0.00216  |
| 152 | PE | PV | 100 μM | 68 | 79 | ELNGTyAISGGR  | y6: Phospho (+79.97)                         | 99.70% | 2.79 | 55   | 3.4  | 2 | 659.30 | 1,316.58 | 0.00119  |
| 153 | PE | PV | 100 μM | 68 | 79 | ELNGTyAISGGR  | y6: Phospho (+79.97)                         | 99.70% | 2.97 | 38.2 | 3.35 | 2 | 659.30 | 1,316.58 | 0.00204  |
| 154 | PE | PV | 100 μM | 68 | 79 | ELNGTyAISGGR  | y6: Phospho (+79.97)                         | 99.70% | 2.41 | 62.8 | 6.24 | 2 | 659.30 | 1,316.58 | 0.00631  |
| 155 | PE | PV | 100 μM | 68 | 79 | ELnGTyAISGGR  | n3: Deamidated (+0.98), y6: Phospho (+79.97) | 99.70% | 2.58 | 74.8 | 4.96 | 2 | 659.79 | 1,317.56 | -0.00138 |
| 156 | PE | PV | 100 μM | 68 | 79 | ELNGTyAISGGR  | y6: Phospho (+79.97)                         | 99.70% | 2.73 | 59.7 | 5.6  | 2 | 659.30 | 1,316.58 | 0.00277  |
| 157 | PE | PV | 100 μM | 68 | 79 | ELNGTyAISGGR  | y6: Phospho (+79.97)                         | 99.70% | 2.97 | 66.5 | 4.77 | 2 | 659.30 | 1,316.58 | 0.00094  |
| 158 | PE | PV | 100 μM | 68 | 79 | ELnGTyAISGGR  | n3: Deamidated (+0.98), y6: Phospho (+79.97) | 99.70% | 2.65 | 56   | 4.08 | 2 | 659.79 | 1,317.56 | 0.00008  |
| 159 | PE | PV | 100 μM | 68 | 79 | ELNGTyAISGGR  | y6: Phospho (+79.97)                         | 99.70% | 3.35 | 53.2 | 4.66 | 2 | 659.30 | 1,316.58 | -0.00028 |
| 160 | PE | PV | 100 μM | 68 | 79 | ELNGTyAISGGR  | y6: Phospho (+79.97)                         | 99.70% | 3.35 | 51.3 | 5.05 | 2 | 659.30 | 1,316.58 | 0.00082  |
| 161 | PE | PV | 100 μM | 68 | 79 | ELNGTyAISGGR  | y6: Phospho (+79.97)                         | 99.70% | 2.56 | 33.9 | 4.89 | 2 | 659.30 | 1,316.58 | 0.00412  |
| 162 | PE | PV | 100 μM | 68 | 79 | ELnGTyAISGGR  | n3: Deamidated (+0.98), y6: Phospho (+79.97) | 99.70% | 2.89 | 47.9 | 4.41 | 2 | 659.79 | 1,317.57 | 0.00557  |
| 163 | PE | PV | 100 μM | 68 | 79 | ELnGTyAISGGR  | n3: Deamidated (+0.98), y6: Phospho (+79.97) | 99.70% | 3.05 | 53.5 | 5.85 | 2 | 659.79 | 1,317.57 | 0.00545  |
| 164 | PE | PV | 100 μM | 68 | 79 | ELnGTyAISGGR  | n3: Deamidated (+0.98), y6: Phospho (+79.97) | 99.70% | 2.76 | 52.5 | 6.7  | 2 | 659.79 | 1,317.57 | 0.00509  |
| 165 | PE | PV | 100 μM | 68 | 79 | ELNGTyAISGGR  | y6: Phospho (+79.97)                         | 99.70% | 3.23 | 50   | 7.14 | 2 | 659.30 | 1,316.58 | 0.00656  |
| 166 | PE | PV | 100 μM | 68 | 79 | ELNGTyAISGGR  | y6: Phospho (+79.97)                         | 99.70% | 3.41 | 50   | 6.26 | 2 | 659.30 | 1,316.58 | 0.00400  |
| 167 | PE | PV | 100 μM | 68 | 79 | ELNGTyAISGGR  | y6: Phospho (+79.97)                         | 99.70% | 3.43 | 51.3 | 5.85 | 2 | 659.30 | 1,316.58 | 0.00424  |
| 168 | PE | PV | 100 μM | 68 | 79 | ELnGtY AISGGR | n3: Deamidated (+0.98), t5: Phospho (+79.97) | 99.70% | 2.84 | 38   | 6.35 | 2 | 659.79 | 1,317.57 | 0.00594  |
| 169 | PE | PV | 100 μM | 68 | 79 | ELNGTyAISGGR  | y6: Phospho (+79.97)                         | 99.70% | 3.41 | 51.4 | 6.17 | 2 | 659.30 | 1,316.58 | 0.00412  |
| 170 | PE | PV | 100 μM | 68 | 79 | ELnGtY AISGGR | n3: Deamidated (+0.98), t5: Phospho (+79.97) | 99.70% | 2.83 | 60.9 | 4.25 | 2 | 659.79 | 1,317.56 | 0.00020  |
| 171 | PE | PV | 100 μM | 68 | 79 | ELnGTyAISGGR  | n3: Deamidated (+0.98), y6: Phospho (+79.97) | 99.60% | 2.49 | 54   | 4.32 | 2 | 659.79 | 1,317.57 | 0.00655  |
| 172 | PE | PV | 100 μM | 68 | 79 | ELNGTyAISGGR  | y6: Phospho (+79.97)                         | 99.70% | 3.13 | 49.3 | 5.66 | 2 | 659.30 | 1,316.58 | 0.00326  |
| 173 | PE | PV | 100 μM | 68 | 79 | ELNGTyAISGGR  | y6: Phospho (+79.97)                         | 99.70% | 3.3  | 52.9 | 5.77 | 2 | 659.30 | 1,316.58 | 0.00326  |

|     |    |    |        |     |     |                          |                                                                                    |        |      |      |      |   |         |          |          |
|-----|----|----|--------|-----|-----|--------------------------|------------------------------------------------------------------------------------|--------|------|------|------|---|---------|----------|----------|
| 174 | PE | PV | 100 µM | 68  | 79  | ELnGTyAISGGR             | n3: Deamidated (+0.98), y6: Phospho (+79.97)                                       | 99.70% | 2.99 | 46.7 | 7.72 | 2 | 659.79  | 1,317.56 | 0.00350  |
| 175 | PE | PV | 100 µM | 68  | 79  | ELnGTyAISGGR             | n3: Deamidated (+0.98), t5: Phospho (+79.97)                                       | 99.70% | 3.11 | 39.7 | 7.44 | 2 | 659.79  | 1,317.56 | 0.00118  |
| 176 | PE | PV | 100 µM | 68  | 79  | ELNGTyAISGGR             | y6: Phospho (+79.97)                                                               | 99.70% | 3.51 | 52.9 | 5.33 | 2 | 659.30  | 1,316.58 | 0.00168  |
| 177 | PE | PV | 100 µM | 68  | 79  | ELNGTyAISGGR             | y6: Phospho (+79.97)                                                               | 99.70% | 3.36 | 49.9 | 7.62 | 2 | 659.30  | 1,316.58 | -0.00077 |
| 178 | PE | PV | 100 µM | 68  | 79  | ELnGTyAISGGR             | n3: Deamidated (+0.98), y6: Phospho (+79.97)                                       | 99.70% | 3.16 | 53.6 | 6.12 | 2 | 659.79  | 1,317.56 | 0.00094  |
| 179 | PE | PV | 100 µM | 68  | 79  | ELnGTyAISGGR             | n3: Deamidated (+0.98), y6: Phospho (+79.97)                                       | 99.70% | 3.24 | 53.8 | 6.42 | 2 | 659.79  | 1,317.56 | 0.00094  |
| 180 | PE | PV | 100 µM | 68  | 79  | ELNGTyAISGGR             | y6: Phospho (+79.97)                                                               | 99.70% | 1.4  | 37.7 | 2.12 | 2 | 659.30  | 1,316.58 | 0.00532  |
| 181 | PE | PV | 100 µM | 68  | 79  | ELnGTyAISGGR             | n3: Deamidated (+0.98), y6: Phospho (+79.97)                                       | 99.70% | 2.7  | 62.9 | 5.3  | 2 | 659.79  | 1,317.56 | 0.00179  |
| 182 | PE | PV | 100 µM | 68  | 79  | ELNGTyAISGGR             | y6: Phospho (+79.97)                                                               | 98.40% | 1.8  | 21.1 | 0    | 1 | 1317.60 | 1,316.59 | 0.01603  |
| 183 | PE | PV | 100 µM | 68  | 79  | ELnGTyAISGGR             | n3: Deamidated (+0.98), t5: Phospho (+79.97)                                       | 99.70% | 2.09 | 36.5 | 5.09 | 2 | 659.80  | 1,317.58 | 0.02059  |
| 184 | PE | PV | 100 µM | 68  | 79  | ELNGTyAISGGR             | y6: Phospho (+79.97)                                                               | 99.70% | 2.99 | 49.3 | 4.55 | 2 | 659.30  | 1,316.59 | 0.01754  |
| 185 | PE | PV | 100 µM | 68  | 79  | ELnGTyAISGGR             | n3: Deamidated (+0.98), t5: Phospho (+79.97)                                       | 99.70% | 2.32 | 38.3 | 5.22 | 2 | 659.80  | 1,317.58 | 0.01998  |
| 186 | PE | PV | 100 µM | 68  | 79  | ELnGTyAISGGR             | n3: Deamidated (+0.98), y6: Phospho (+79.97)                                       | 99.70% | 2.24 | 44   | 5.89 | 2 | 659.80  | 1,317.58 | 0.02218  |
| 187 | PE | PV | 100 µM | 68  | 79  | ELNGTyAISGGR             | y6: Phospho (+79.97)                                                               | 99.70% | 2.45 | 52.7 | 5.22 | 2 | 659.30  | 1,316.59 | 0.01779  |
| 188 | PE | PV | 100 µM | 68  | 79  | ELNGTyAISGGR             | y6: Phospho (+79.97)                                                               | 99.70% | 2.93 | 36.1 | 5.68 | 2 | 659.31  | 1,316.60 | 0.01925  |
| 189 | PE | PV | 100 µM | 68  | 79  | ELNGTyAISGGR             | y6: Phospho (+79.97)                                                               | 99.70% | 2.18 | 71.5 | 7.05 | 2 | 659.30  | 1,316.59 | 0.01559  |
| 190 | PE | PV | 100 µM | 68  | 79  | eLNGTyAISGGR             | n-term: Dehydrated (-18.01), n3: Deamidated (+0.98), y6: Phospho (+79.97)          | 97.60% | 0    | 0    | 2.09 | 2 | 650.78  | 1,299.55 | -0.00034 |
| 191 | PE | PV | 100 µM | 68  | 79  | ELNGTyAISGGR             | y6: Phospho (+79.97)                                                               | 99.70% | 1.51 | 46.5 | 1.89 | 2 | 659.30  | 1,316.58 | 0.00375  |
| 192 | PE | PV | 30 µM  | 80  | 103 | AHASPADLcHYHsQEPDGLIcLLK | c9: Carbamidomethyl (+57.02), s13: Phospho (+79.97), c21: Carbamidomethyl (+57.02) | 99.70% | 2.56 | 14.1 | 4.03 | 4 | 703.83  | 2,811.27 | 0.01961  |
| 193 | PE | PV | 30 µM  | 80  | 103 | AHASPADLcHyHSQEPDGLIcLLK | c9: Carbamidomethyl (+57.02), y11: Phospho (+79.97), c21: Carbamidomethyl (+57.02) | 99.70% | 3.55 | 30.6 | 5.42 | 4 | 703.82  | 2,811.26 | 0.00594  |
| 194 | PE | PV | 30 µM  | 80  | 103 | AHASPADLcHYHsQEPDGLIcLLK | c9: Carbamidomethyl (+57.02), s13: Phospho (+79.97), c21: Carbamidomethyl (+57.02) | 99.70% | 3.85 | 26   | 4.19 | 4 | 703.82  | 2,811.26 | 0.00643  |
| 195 | PE | PV | 100 µM | 80  | 103 | AHASPADLcHyHSQEPDGLIcLLK | c9: Carbamidomethyl (+57.02), y11: Phospho (+79.97), c21: Carbamidomethyl (+57.02) | 99.70% | 3.93 | 30.5 | 6.37 | 4 | 703.82  | 2,811.25 | 0.00325  |
| 196 | PE | PV | 100 µM | 80  | 103 | AHASPADLcHYHsQEPDGLIcLLK | c9: Carbamidomethyl (+57.02), s13: Phospho (+79.97), c21: Carbamidomethyl (+57.02) | 99.70% | 2.57 | 27.1 | 3.38 | 4 | 703.82  | 2,811.26 | 0.00863  |
| 197 | PE | PV | 10 µM  | 116 | 132 | TGPFEDLKENLIREyVK        | y15: Phospho (+79.97)                                                              | 99.70% | 2.68 | 50.1 | 12.2 | 3 | 711.02  | 2,130.04 | 0.00106  |
| 198 | PE | PV | 10 µM  | 116 | 132 | TGPFEDLKENLIREyVK        | y15: Phospho (+79.97)                                                              | 99.70% | 3.37 | 29.8 | 6.04 | 3 | 711.02  | 2,130.04 | -0.00077 |

|     |    |    |        |     |     |                              |                                                     |        |      |      |      |   |         |          |          |
|-----|----|----|--------|-----|-----|------------------------------|-----------------------------------------------------|--------|------|------|------|---|---------|----------|----------|
| 199 | PE | PV | 10 µM  | 116 | 132 | TGPFEDLKENLIREyVK            | y15: Phospho (+79.97)                               | 99.70% | 2.94 | 37.5 | 4.14 | 3 | 711.02  | 2,130.04 | 0.00289  |
| 200 | PE | PV | 30 µM  | 116 | 132 | TGPFEDLKENLIREyVK            | y15: Phospho (+79.97)                               | 99.70% | 3.11 | 23.2 | 6.1  | 3 | 711.02  | 2,130.04 | -0.00169 |
| 201 | PE | PV | 30 µM  | 116 | 132 | TGPFEDLKENLIREyVK            | y15: Phospho (+79.97)                               | 99.70% | 3.35 | 39.4 | 4.89 | 3 | 711.02  | 2,130.04 | -0.00370 |
| 202 | PE | PV | 100 µM | 116 | 132 | TGPFEDLKENLIREyVK            | y15: Phospho (+79.97)                               | 99.70% | 3.65 | 38.1 | 8.07 | 3 | 711.02  | 2,130.04 | -0.00041 |
| 203 | PE | PV | 30 µM  | 129 | 155 | EyVKQTNWNLQGQALEQAIISQKPQLEK | y2: Phospho (+79.97)                                | 99.00% | 1.42 | 0    | 0.43 | 4 | 813.42  | 3,249.65 | 0.00180  |
| 204 | PE | PV | 30 µM  | 129 | 155 | EyVKQTNWNLQGQALEQAIISQKPQLEK | y2: Phospho (+79.97)                                | 99.30% | 1.09 | 0    | 0.48 | 4 | 813.42  | 3,249.64 | -0.00357 |
| 205 | PE | PV | 30 µM  | 129 | 155 | EyVKQTNWNLQGQALEQAIISQKPQLEK | y2: Phospho (+79.97)                                | 99.60% | 1.25 | 0    | 0.52 | 4 | 813.42  | 3,249.64 | -0.00016 |
| 206 | PE | PV | 30 µM  | 129 | 155 | EyVKQTNWNLQGQALEQAIISQKPQLEK | y2: Phospho (+79.97)                                | 99.70% | 1.63 | 27.2 | 2.41 | 3 | 1084.22 | 3,249.65 | 0.00737  |
| 207 | PE | PV | 30 µM  | 129 | 155 | EyVKQTNWNLQGQALEQAIISQKPQLEK | y2: Phospho (+79.97)                                | 99.70% | 2.21 | 26.9 | 6.96 | 4 | 813.42  | 3,249.65 | 0.01034  |
| 208 | PE | PV | 100 µM | 129 | 155 | EyVKQTNWNLQGQALEQAIISQKPQLEK | y2: Phospho (+79.97)                                | 93.70% | 0.91 | 0    | 2.17 | 4 | 813.42  | 3,249.65 | 0.00400  |
| 209 | PE | PV | 100 µM | 129 | 155 | EyVKQTNWNLQGQALEQAIISQKPQLEK | y2: Phospho (+79.97)                                | 99.30% | 1.86 | 0    | 1.36 | 4 | 813.42  | 3,249.65 | 0.00888  |
| 210 | PE | PV | 100 µM | 129 | 155 | EyVKQTNWNLQGQALEQAIISQKPQLEK | y2: Phospho (+79.97)                                | 99.70% | 1.43 | 0    | 1.66 | 4 | 813.42  | 3,249.65 | 0.00204  |
| 211 | PE | PV | 100 µM | 129 | 155 | EyVKQTNWNLQGQALEQAIISQKPQLEK | y2: Phospho (+79.97)                                | 99.70% | 1.31 | 16.3 | 2.52 | 4 | 813.42  | 3,249.65 | 0.00131  |
| 212 | PE | PV | 100 µM | 129 | 155 | EyVKQTNWNLQGQALEQAIISQKPQLEK | y2: Phospho (+79.97)                                | 99.70% | 1.55 | 29.3 | 3.72 | 4 | 813.42  | 3,249.65 | 0.01107  |
| 213 | PE | PV | 100 µM | 129 | 155 | EyVKQTNWNLQGQALEQAIISQKPQLEK | y2: Phospho (+79.97)                                | 99.70% | 2.46 | 31.8 | 4.85 | 4 | 813.42  | 3,249.64 | -0.00211 |
| 214 | PE | PV | 100 µM | 129 | 155 | EyVKQTNWNLQGQALEQAIISQKPQLEK | y2: Phospho (+79.97)                                | 99.70% | 3.18 | 24.6 | 1.8  | 4 | 813.42  | 3,249.64 | -0.00504 |
| 215 | PE | PV | 30 µM  | 195 | 211 | ARDNSGSyALcLLHEGK            | y8: Phospho (+79.97), c11: Carbamidomethyl (+57.02) | 99.60% | 1.27 | 18.8 | 2.31 | 3 | 657.63  | 1,969.88 | 0.00328  |
| 216 | PE | PV | 100 µM | 195 | 211 | ARDNSGSyALcLLHEGK            | y8: Phospho (+79.97), c11: Carbamidomethyl (+57.02) | 99.70% | 1.42 | 18.3 | 3.26 | 3 | 657.63  | 1,969.87 | -0.00093 |
| 217 | PE | PV | 30 µM  | 197 | 211 | DNSGSyALcLLHEGK              | y6: Phospho (+79.97), c9: Carbamidomethyl (+57.02)  | 99.70% | 3.38 | 34   | 6.43 | 3 | 581.92  | 1,742.74 | 0.00628  |
| 218 | PE | PV | 100 µM | 197 | 211 | DNsGSyALcLLHEGK              | s3: Phospho (+79.97), c9: Carbamidomethyl (+57.02)  | 96.40% | 0.74 | 13.4 | 0    | 3 | 581.92  | 1,742.74 | 0.00317  |
| 219 | PE | PV | 100 µM | 197 | 211 | DNsGSyALcLLHEGK              | s3: Phospho (+79.97), c9: Carbamidomethyl (+57.02)  | 99.70% | 0.94 | 29.3 | 3.38 | 3 | 581.92  | 1,742.74 | 0.00885  |
| 220 | PE | PV | 30 µM  | 232 | 252 | KFDTLWQLVEHySYKPDGLLR        | y14: Phospho (+79.97)                               | 99.70% | 2.07 | 31.5 | 6.54 | 4 | 672.84  | 2,687.32 | 0.00921  |
| 221 | PE | PV | 30 µM  | 232 | 252 | KFDTLWQLVEHySYKPDGLLR        | y12: Phospho (+79.97)                               | 99.70% | 2.99 | 35   | 8.72 | 4 | 672.84  | 2,687.33 | 0.01189  |
| 222 | PE | PV | 30 µM  | 232 | 252 | KFDTLWQLVEHySYKPDGLLR        | s13: Phospho (+79.97)                               | 99.70% | 2.75 | 22.6 | 7.89 | 4 | 672.84  | 2,687.32 | 0.00408  |
| 223 | PE | PV | 100 µM | 232 | 252 | KFDTLWQLVEHySYKPDGLLR        | y12: Phospho (+79.97)                               | 99.70% | 3.73 | 32.2 | 7.89 | 4 | 672.84  | 2,687.32 | 0.00848  |
| 224 | IP | Ig | 2 min  | 261 | 286 | IGAQMGPgSPNAHPVTWSPGGIISR    | m5: Oxidation (+15.99), s10: Phospho (+79.97)       | 99.70% | 4.22 | 37.5 | 3.34 | 3 | 907.44  | 2,719.29 | 0.01879  |
| 225 | IP | Ig | 2 min  | 261 | 286 | IGAQMGPgSPNAHPVTWSPGGIISR    | m5: Oxidation (+15.99), s10: Phospho (+79.97)       | 98.20% | 4.01 | 34.3 | 1.55 | 3 | 907.44  | 2,719.29 | 0.02062  |
| 226 | IP | Ig | 2 min  | 261 | 286 | IGAQMGPgSPNAHPVTWSPGGIISR    | m5: Oxidation (+15.99), s10: Phospho (+79.97)       | 98.70% | 3.66 | 29.4 | 1.96 | 3 | 907.44  | 2,719.29 | 0.02428  |
| 227 | IP | Ig | 2 min  | 261 | 286 | IGAQMGPgSPNAHPVTWSPGGIISR    | m5: Oxidation (+15.99), s10: Phospho (+79.97)       | 98.80% | 4.47 | 50.3 | 2.18 | 3 | 907.44  | 2,719.29 | 0.02044  |
| 228 | IP | Ig | 2 min  | 261 | 286 | IGAQMGPgSPNAHPVTWSPGGIISR    | m5: Oxidation (+15.99), s10: Phospho (+79.97)       | 97.70% | 2.38 | 31   | 3    | 3 | 907.43  | 2,719.27 | 0.00158  |
| 229 | IP | Ig | 2 min  | 261 | 286 | IGAQMGPgSPNAHPVTWSPGGIISR    | m5: Oxidation (+15.99), s10: Phospho (+79.97)       | 98.90% | 2.01 | 41   | 4.29 | 4 | 680.82  | 2,719.27 | 0.00114  |
| 230 | IP | Ig | 2 min  | 261 | 286 | IGAQMGPgSPNAHPVTWSPGGIISR    | m5: Oxidation (+15.99), s10: Phospho (+79.97)       | 99.50% | 4.22 | 27.2 | 2    | 3 | 907.43  | 2,719.27 | 0.00103  |

|     |    |    |       |     |     |                           |                                                                      |        |      |      |      |   |        |          |          |
|-----|----|----|-------|-----|-----|---------------------------|----------------------------------------------------------------------|--------|------|------|------|---|--------|----------|----------|
| 231 | IP | Ig | 2 min | 261 | 286 | IGAQMHPGsPNAHPVTWSPGGIISR | m5: Oxidation (+15.99), s10: Phospho (+79.97)                        | 99.70% | 3.69 | 24.1 | 2.36 | 3 | 907.43 | 2,719.27 | 0.00121  |
| 232 | IP | Ig | 2 min | 261 | 286 | IGAQMHPGsPNAHPVTWSPGGIISR | m5: Oxidation (+15.99), s10: Phospho (+79.97)                        | 99.70% | 4.11 | 48.4 | 4.14 | 3 | 907.43 | 2,719.27 | 0.00121  |
| 233 | IP | NT | 0     | 261 | 286 | IGAQMHPGsPNAHPVTWSPGGIISR | m5: Oxidation (+15.99), s10: Phospho (+79.97)                        | 97.80% | 1.08 | 20.6 | 1.47 | 3 | 907.43 | 2,719.28 | 0.01037  |
| 234 | IP | NT | 0     | 261 | 286 | IGAQMHPGsPNAHPVTWSPGGIISR | s10: Phospho (+79.97)                                                | 99.70% | 2.28 | 28   | 4.05 | 3 | 902.10 | 2,703.28 | 0.00132  |
| 235 | IP | NT | 0     | 261 | 286 | IGAQMHPGsPNAHPVTWSPGGIISR | m5: Oxidation (+15.99), s10: Phospho (+79.97)                        | 99.70% | 2.47 | 32.8 | 7.92 | 4 | 680.83 | 2,719.27 | 0.00334  |
| 236 | IP | NT | 0     | 261 | 286 | IGAQMHPGsPNAHPVTWSPGGIISR | m5: Oxidation (+15.99), s10: Phospho (+79.97)                        | 99.70% | 2.37 | 35.3 | 3.42 | 3 | 907.43 | 2,719.28 | 0.00597  |
| 237 | IP | NT | 0     | 261 | 286 | IGAQMHPGsPNAHPVTWSPGGIISR | s10: Phospho (+79.97)                                                | 94.00% | 1.44 | 28.1 | 1.77 | 3 | 902.10 | 2,703.27 | 0.00040  |
| 238 | IP | NT | 0     | 261 | 286 | IGAQMHPGsPNAHPVTWSPGGIISR | m5: Oxidation (+15.99), s10: Phospho (+79.97)                        | 99.50% | 3.95 | 45.9 | 8.48 | 4 | 680.82 | 2,719.27 | -0.00057 |
| 239 | IP | NT | 0     | 261 | 286 | IGAQMHPGsPNAHPVTWSPGGIISR | m5: Oxidation (+15.99), s10: Phospho (+79.97)                        | 99.70% | 4.52 | 30   | 4.04 | 3 | 907.43 | 2,719.28 | 0.00817  |
| 240 | IP | NT | 0     | 261 | 286 | IGAQMHPGsPNAHPVTWSPGGIISR | m5: Oxidation (+15.99), s10: Phospho (+79.97)                        | 99.60% | 3.61 | 26.4 | 0    | 3 | 907.43 | 2,719.27 | 0.00103  |
| 241 | IP | Hg | 50 µM | 261 | 286 | IGAQMHPGsPNAHPVTWSPGGIISR | m5: Oxidation (+15.99), s10: Phospho (+79.97)                        | 96.50% | 3.46 | 28.4 | 0    | 3 | 907.44 | 2,719.29 | 0.02062  |
| 242 | IP | Hg | 50 µM | 261 | 286 | IGAQMHPGsPNAHPVTWSPGGIISR | m5: Oxidation (+15.99), s10: Phospho (+79.97)                        | 99.70% | 3.9  | 35.7 | 0    | 3 | 907.44 | 2,719.29 | 0.01751  |
| 243 | IP | Hg | 50 µM | 261 | 286 | IGAQMHPGsPNAHPVTWSPGGIISR | m5: Oxidation (+15.99), s10: Phospho (+79.97)                        | 99.70% | 5.39 | 45.9 | 9.7  | 4 | 680.82 | 2,719.27 | 0.00089  |
| 244 | IP | Hg | 50 µM | 261 | 286 | IGAQMHPGsPNAHPVTWSPGGIISR | m5: Oxidation (+15.99), s10: Phospho (+79.97)                        | 99.70% | 4.87 | 30.8 | 7.66 | 3 | 907.43 | 2,719.27 | -0.00208 |
| 245 | IP | Hg | 50 µM | 261 | 286 | IGAQMHPGsPNAHPVTWSPGGIISR | m5: Oxidation (+15.99), s10: Phospho (+79.97), s19: Phospho (+79.97) | 99.60% | 4.29 | 3.55 | 0    | 3 | 934.09 | 2,799.24 | 0.00436  |
| 246 | IP | Hg | 50 µM | 261 | 286 | IGAQMHPGsPNAHPVTWSPGGIISR | m5: Oxidation (+15.99), s19: Phospho (+79.97)                        | 99.70% | 4.66 | 4.73 | 2.89 | 3 | 907.43 | 2,719.28 | 0.00597  |
| 247 | IP | Hg | 50 µM | 261 | 286 | IGAQMHPGsPNAHPVTWSPGGIISR | m5: Oxidation (+15.99), s10: Phospho (+79.97)                        | 99.70% | 4.26 | 46.9 | 3.39 | 3 | 907.43 | 2,719.27 | -0.00044 |
| 248 | IP | Hg | 50 µM | 261 | 286 | IGAQMHPGsPNAHPVTWSPGGIISR | m5: Oxidation (+15.99), s10: Phospho (+79.97)                        | 99.70% | 5.1  | 38.4 | 3.21 | 3 | 907.43 | 2,719.27 | 0.00231  |
| 249 | IP | Hg | 50 µM | 261 | 286 | IGAQMHPGsPNAHPVTWSPGGIISR | m5: Oxidation (+15.99), s10: Phospho (+79.97)                        | 99.70% | 4.59 | 33.7 | 4.57 | 3 | 907.43 | 2,719.27 | 0.00378  |
| 250 | IP | PV | 0     | 261 | 286 | IGAQMHPGsPNAHPVTWSPGGIISR | m5: Oxidation (+15.99), s19: Phospho (+79.97)                        | 97.00% | 3.88 | 6.15 | 1.38 | 3 | 907.43 | 2,719.27 | 0.00488  |
| 251 | IP | PV | 0     | 261 | 286 | IGAQMHPGsPNAHPVTWSPGGIISR | m5: Oxidation (+15.99), s10: Phospho (+79.97)                        | 99.20% | 4.05 | 30.9 | 2.17 | 3 | 907.43 | 2,719.27 | 0.00359  |
| 252 | IP | PV | 0     | 261 | 286 | IGAQMHPGsPNAHPVTWSPGGIISR | m5: Oxidation (+15.99), s10: Phospho (+79.97)                        | 99.70% | 4.49 | 28.9 | 3.52 | 3 | 907.43 | 2,719.27 | 0.00359  |
| 253 | IP | PV | 0     | 261 | 286 | IGAQMHPGsPNAHPVTWSPGGIISR | m5: Oxidation (+15.99), s10: Phospho (+79.97)                        | 99.70% | 4.34 | 45.9 | 3.64 | 3 | 907.43 | 2,719.27 | 0.00304  |



|     |    |    |       |     |     |                           |                                               |        |      |      |      |   |        |          |          |
|-----|----|----|-------|-----|-----|---------------------------|-----------------------------------------------|--------|------|------|------|---|--------|----------|----------|
| 254 | IP | PV | 0     | 261 | 286 | IGAQMGPgSPNAHPVTWSPGGIISR | m5: Oxidation (+15.99), s10: Phospho (+79.97) | 99.70% | 4.95 | 37.4 | 3.92 | 3 | 907.43 | 2,719.27 | 0.00085  |
| 255 | PE | lg | NT    | 261 | 286 | IGAQMGPgSPNAHPVTWSPGGIISR | s19: Phospho (+79.97)                         | 99.70% | 3.03 | 30.8 | 3.08 | 4 | 676.83 | 2,703.28 | 0.00948  |
| 256 | PE | lg | NT    | 261 | 286 | IGAQMGPgSPNAHPVTWSPGGIISR | s10: Phospho (+79.97)                         | 99.70% | 2.3  | 26.9 | 3.96 | 3 | 902.10 | 2,703.28 | 0.00754  |
| 257 | PE | lg | NT    | 261 | 286 | IGAQMGPgSPNAHPVTWSPGGIISR | s10: Phospho (+79.97)                         | 99.70% | 3.32 | 22   | 4.22 | 3 | 902.10 | 2,703.28 | 0.00480  |
| 258 | PE | lg | NT    | 261 | 286 | IGAQMGPgSPNAHPVTWSPGGIISR | s10: Phospho (+79.97)                         | 99.70% | 3.81 | 34.2 | 9.68 | 4 | 676.83 | 2,703.28 | 0.00362  |
| 259 | PE | lg | NT    | 261 | 286 | IGAQMGPgSPNAHPVTWSPGGIISR | s19: Phospho (+79.97)                         | 99.50% | 3.11 | 12.8 | 0    | 4 | 676.83 | 2,703.28 | 0.00533  |
| 260 | PE | lg | NT    | 261 | 286 | IGAQMGPgSPNAHPVTWSPGGIISR | s19: Phospho (+79.97)                         | 99.70% | 2.69 | 23.2 | 3.1  | 4 | 676.83 | 2,703.28 | 0.00948  |
| 261 | PE | lg | NT    | 261 | 286 | IGAQMGPgSPNAHPVTWSPGGIISR | m5: Oxidation (+15.99), s10: Phospho (+79.97) | 99.70% | 2.85 | 23   | 2.8  | 4 | 680.83 | 2,719.27 | 0.00431  |
| 262 | PE | lg | NT    | 261 | 286 | IGAQMGPgSPNAHPVTWSPGGIISR | m5: Oxidation (+15.99), s10: Phospho (+79.97) | 99.70% | 3.36 | 24.5 | 5.8  | 3 | 907.43 | 2,719.28 | 0.01037  |
| 263 | PE | lg | NT    | 261 | 286 | IGAQMGPgSPNAHPVTWSPGGIISR | s10: Phospho (+79.97)                         | 99.70% | 4    | 38.2 | 7.37 | 4 | 676.82 | 2,703.27 | -0.00370 |
| 264 | PE | lg | NT    | 261 | 286 | IGAQMGPgSPNAHPVTWSPGGIISR | s10: Phospho (+79.97)                         | 99.70% | 6.56 | 33.8 | 9.13 | 3 | 902.10 | 2,703.27 | -0.00033 |
| 265 | PE | lg | NT    | 261 | 286 | IGAQMGPgSPNAHPVTWSPGGIISR | s10: Phospho (+79.97)                         | 99.70% | 5.3  | 47.6 | 8.96 | 4 | 676.83 | 2,703.27 | 0.00045  |
| 266 | PE | lg | NT    | 261 | 286 | IGAQMGPgSPNAHPVTWSPGGIISR | s10: Phospho (+79.97)                         | 99.70% | 2.71 | 29.6 | 4.03 | 3 | 902.11 | 2,703.31 | 0.03757  |
| 267 | PE | lg | NT    | 261 | 286 | IGAQMGPgSPNAHPVTWSPGGIISR | s10: Phospho (+79.97)                         | 99.70% | 2.88 | 45.3 | 6.42 | 4 | 676.84 | 2,703.31 | 0.03731  |
| 268 | PE | lg | NT    | 261 | 286 | IGAQMGPgSPNAHPVTWSPGGIISR | s10: Phospho (+79.97)                         | 99.70% | 3.02 | 30.7 | 7.8  | 4 | 676.84 | 2,703.32 | 0.04244  |
| 269 | PE | lg | NT    | 261 | 286 | IGAQMGPgSPNAHPVTWSPGGIISR | s10: Phospho (+79.97)                         | 99.70% | 3.15 | 38.6 | 4.68 | 3 | 902.11 | 2,703.31 | 0.03647  |
| 270 | PE | lg | 1 min | 261 | 286 | IGAQMGPgSPNAHPVTWSPGGIISR | s10: Phospho (+79.97)                         | 99.70% | 3.17 | 29.2 | 7.27 | 4 | 676.83 | 2,703.27 | -0.00004 |
| 271 | PE | lg | 1 min | 261 | 286 | IGAQMGPgSPNAHPVTWSPGGIISR | s10: Phospho (+79.97)                         | 99.70% | 3.5  | 54.3 | 10.2 | 4 | 676.83 | 2,703.27 | -0.00297 |
| 272 | PE | lg | 1 min | 261 | 286 | IGAQMGPgSPNAHPVTWSPGGIISR | s19: Phospho (+79.97)                         | 99.60% | 2.86 | 16.9 | 1.52 | 4 | 676.82 | 2,703.27 | -0.00541 |
| 273 | PE | lg | 1 min | 261 | 286 | IGAQMGPgSPNAHPVTWSPGGIISR | s10: Phospho (+79.97)                         | 99.70% | 3.63 | 24   | 6.7  | 3 | 902.10 | 2,703.28 | 0.00150  |
| 274 | PE | lg | 1 min | 261 | 286 | IGAQMGPgSPNAHPVTWSPGGIISR | t17: Phospho (+79.97)                         | 99.70% | 3.29 | 22.5 | 7.77 | 4 | 676.83 | 2,703.28 | 0.00460  |
| 275 | PE | lg | 1 min | 261 | 286 | IGAQMGPgSPNAHPVTWSPGGIISR | s10: Phospho (+79.97)                         | 99.70% | 4.51 | 33.5 | 8.28 | 4 | 676.83 | 2,703.27 | -0.00004 |
| 276 | PE | lg | 1 min | 261 | 286 | IGAQMGPgSPNAHPVTWSPGGIISR | s10: Phospho (+79.97)                         | 99.70% | 6.89 | 44.6 | 8.68 | 3 | 902.10 | 2,703.27 | 0.00022  |
| 277 | PE | lg | 1 min | 261 | 286 | IGAQMGPgSPNAHPVTWSPGGIISR | s10: Phospho (+79.97)                         | 99.70% | 5.27 | 49.2 | 11.3 | 4 | 676.83 | 2,703.28 | 0.00631  |
| 278 | PE | lg | 1 min | 261 | 286 | IGAQMGPgSPNAHPVTWSPGGIISR | s10: Phospho (+79.97)                         | 99.70% | 5.69 | 35.9 | 7.51 | 3 | 902.10 | 2,703.27 | 0.00058  |
| 279 | PE | lg | 1 min | 261 | 286 | IGAQMGPgSPNAHPVTWSPGGIISR | s10: Phospho (+79.97)                         | 99.70% | 2.74 | 26.6 | 2.27 | 3 | 902.11 | 2,703.31 | 0.03336  |
| 280 | PE | lg | 1 min | 261 | 286 | IGAQMGPgSPNAHPVTWSPGGIISR | s10: Phospho (+79.97)                         | 99.70% | 2.63 | 17.7 | 3.8  | 3 | 902.11 | 2,703.30 | 0.02219  |
| 281 | PE | lg | 1 min | 261 | 286 | IGAQMGPgSPNAHPVTWSPGGIISR | m5: Oxidation (+15.99), s10: Phospho (+79.97) | 99.70% | 3.29 | 29.5 | 2.51 | 3 | 907.44 | 2,719.31 | 0.03838  |
| 282 | PE | lg | 1 min | 261 | 286 | IGAQMGPgSPNAHPVTWSPGGIISR | s10: Phospho (+79.97)                         | 99.70% | 2.92 | 26.2 | 3.8  | 3 | 902.11 | 2,703.32 | 0.04087  |
| 283 | PE | lg | 1 min | 261 | 286 | IGAQMGPgSPNAHPVTWSPGGIISR | s10: Phospho (+79.97)                         | 99.70% | 2.48 | 40.3 | 7.82 | 4 | 676.83 | 2,703.31 | 0.03414  |
| 284 | PE | lg | 1 min | 261 | 286 | IGAQMGPgSPNAHPVTWSPGGIISR | s10: Phospho (+79.97)                         | 99.70% | 3.1  | 23.8 | 8.59 | 4 | 676.83 | 2,703.31 | 0.03097  |
| 285 | PE | lg | 1 min | 261 | 286 | IGAQMGPgSPNAHPVTWSPGGIISR | s10: Phospho (+79.97)                         | 99.70% | 3.43 | 35.8 | 5.28 | 3 | 902.11 | 2,703.31 | 0.03373  |
| 286 | PE | lg | 2 min | 261 | 286 | IGAQMGPgSPNAHPVTWSPGGIISR | s19: Phospho (+79.97)                         | 99.70% | 2.78 | 24.8 | 2.52 | 4 | 676.83 | 2,703.28 | 0.00924  |
| 287 | PE | lg | 2 min | 261 | 286 | IGAQMGPgSPNAHPVTWSPGGIISR | s10: Phospho (+79.97)                         | 99.70% | 2.86 | 17.1 | 4.96 | 3 | 902.10 | 2,703.28 | 0.00296  |
| 288 | PE | lg | 2 min | 261 | 286 | IGAQMGPgSPNAHPVTWSPGGIISR | s10: Phospho (+79.97)                         | 99.70% | 3    | 27   | 5.24 | 3 | 902.10 | 2,703.28 | 0.00223  |
| 289 | PE | lg | 2 min | 261 | 286 | IGAQMGPgSPNAHPVTWSPGGIISR | s10: Phospho (+79.97)                         | 99.70% | 3.56 | 35.5 | 7.82 | 4 | 676.83 | 2,703.28 | 0.00362  |
| 290 | PE | lg | 2 min | 261 | 286 | IGAQMGPgSPNAHPVTWSPGGIISR | s10: Phospho (+79.97)                         | 99.70% | 4.3  | 39.1 | 9.14 | 4 | 676.83 | 2,703.27 | 0.00020  |
| 291 | PE | lg | 2 min | 261 | 286 | IGAQMGPgSPNAHPVTWSPGGIISR | s10: Phospho (+79.97)                         | 99.70% | 4.31 | 45.4 | 10.4 | 4 | 676.83 | 2,703.28 | 0.00265  |
| 292 | PE | lg | 2 min | 261 | 286 | IGAQMGPgSPNAHPVTWSPGGIISR | s19: Phospho (+79.97)                         | 99.70% | 3.34 | 19.3 | 2.92 | 3 | 902.10 | 2,703.27 | -0.00656 |
| 293 | PE | lg | 2 min | 261 | 286 | IGAQMGPgSPNAHPVTWSPGGIISR | s19: Phospho (+79.97)                         | 99.70% | 2.75 | 21.5 | 0    | 4 | 676.83 | 2,703.28 | 0.00435  |
| 294 | PE | lg | 2 min | 261 | 286 | IGAQMGPgSPNAHPVTWSPGGIISR | s10: Phospho (+79.97)                         | 99.70% | 2.48 | 23.6 | 6.28 | 4 | 676.83 | 2,703.28 | 0.00362  |

|     |    |    |       |     |     |                          |                                                                        |        |      |      |      |   |        |          |          |
|-----|----|----|-------|-----|-----|--------------------------|------------------------------------------------------------------------|--------|------|------|------|---|--------|----------|----------|
| 295 | PE | lg | 2 min | 261 | 286 | IGAQMGPgSNAHPVTWSPGGIISR | s10: Phospho (+79.97)                                                  | 99.70% | 5.14 | 37.1 | 9.85 | 4 | 676.83 | 2,703.28 | 0.00142  |
| 296 | PE | lg | 2 min | 261 | 286 | IGAQMGPgSNAHPVTWSPGGIISR | s10: Phospho (+79.97)                                                  | 99.70% | 6.2  | 43.1 | 9.77 | 3 | 902.10 | 2,703.28 | 0.00095  |
| 297 | PE | lg | 2 min | 261 | 286 | IGAQMGPgSNAHPVTWSPGGIISR | s10: Phospho (+79.97)                                                  | 99.70% | 5.78 | 38.3 | 7.44 | 3 | 902.10 | 2,703.27 | 0.00003  |
| 298 | PE | lg | 2 min | 261 | 286 | IGAQMGPgSNAHPVTWSPGGIISR | s10: Phospho (+79.97)                                                  | 99.70% | 1.55 | 11.6 | 0    | 3 | 902.10 | 2,703.28 | 0.00461  |
| 299 | PE | lg | 2 min | 261 | 286 | IGAQMGPgSNAHPVTWSPGGIISR | m5: Oxidation (+15.99), s10: Phospho (+79.97), n12: Deamidated (+0.98) | 89.40% | 0    | 0    | 3.74 | 3 | 907.78 | 2,720.31 | 0.05760  |
| 300 | PE | lg | 2 min | 261 | 286 | IGAQMGPgSNAHPVTWSPGGIISR | s10: Phospho (+79.97)                                                  | 99.70% | 2.81 | 17.6 | 3.17 | 3 | 902.11 | 2,703.30 | 0.02256  |
| 301 | PE | lg | 2 min | 261 | 286 | IGAQMGPgSNAHPVTWSPGGIISR | s10: Phospho (+79.97)                                                  | 99.70% | 2.71 | 16.6 | 2.89 | 3 | 902.11 | 2,703.30 | 0.02915  |
| 302 | PE | lg | 2 min | 261 | 286 | IGAQMGPgSNAHPVTWSPGGIISR | s10: Phospho (+79.97)                                                  | 99.70% | 2.88 | 30   | 3.89 | 3 | 902.11 | 2,703.31 | 0.03281  |
| 303 | PE | lg | 2 min | 261 | 286 | IGAQMGPgSNAHPVTWSPGGIISR | m5: Oxidation (+15.99), s10: Phospho (+79.97)                          | 99.70% | 3.11 | 21.1 | 5.52 | 4 | 680.83 | 2,719.31 | 0.03996  |
| 304 | PE | lg | 2 min | 261 | 286 | IGAQMGPgSNAHPVTWSPGGIISR | s10: Phospho (+79.97)                                                  | 99.70% | 2.43 | 31.4 | 6.08 | 4 | 676.83 | 2,703.31 | 0.03634  |
| 305 | PE | lg | 2 min | 261 | 286 | IGAQMGPgSNAHPVTWSPGGIISR | s10: Phospho (+79.97)                                                  | 99.70% | 3.09 | 45.3 | 6.8  | 4 | 676.84 | 2,703.31 | 0.03829  |
| 306 | PE | lg | 2 min | 261 | 286 | IGAQMGPgSNAHPVTWSPGGIISR | s10: Phospho (+79.97)                                                  | 99.70% | 2.91 | 40.6 | 9.34 | 4 | 676.84 | 2,703.31 | 0.03853  |
| 307 | PE | lg | 3 min | 261 | 286 | IGAQMGPgSNAHPVTWSPGGIISR | s10: Phospho (+79.97)                                                  | 99.70% | 3.71 | 0    | 4.34 | 3 | 902.10 | 2,703.28 | 0.00571  |
| 308 | PE | lg | 3 min | 261 | 286 | IGAQMGPgSNAHPVTWSPGGIISR | s10: Phospho (+79.97)                                                  | 99.70% | 3.88 | 24   | 6.89 | 3 | 902.10 | 2,703.27 | -0.00619 |
| 309 | PE | lg | 3 min | 261 | 286 | IGAQMGPgSNAHPVTWSPGGIISR | s10: Phospho (+79.97)                                                  | 99.70% | 3.11 | 19.3 | 7.49 | 4 | 676.83 | 2,703.28 | 0.00265  |
| 310 | PE | lg | 3 min | 261 | 286 | IGAQMGPgSNAHPVTWSPGGIISR | s10: Phospho (+79.97)                                                  | 99.70% | 3.14 | 30   | 7.59 | 4 | 676.83 | 2,703.28 | 0.00387  |
| 311 | PE | lg | 3 min | 261 | 286 | IGAQMGPgSNAHPVTWSPGGIISR | s10: Phospho (+79.97)                                                  | 99.70% | 4.16 | 35.8 | 8.92 | 4 | 676.83 | 2,703.28 | 0.00362  |
| 312 | PE | lg | 3 min | 261 | 286 | IGAQMGPgSNAHPVTWSPGGIISR | s19: Phospho (+79.97)                                                  | 99.50% | 2.49 | 0    | 2.55 | 3 | 902.10 | 2,703.27 | -0.00729 |
| 313 | PE | lg | 3 min | 261 | 286 | IGAQMGPgSNAHPVTWSPGGIISR | s19: Phospho (+79.97)                                                  | 99.70% | 3.16 | 28   | 1.68 | 4 | 676.83 | 2,703.27 | -0.00297 |
| 314 | PE | lg | 3 min | 261 | 286 | IGAQMGPgSNAHPVTWSPGGIISR | s10: Phospho (+79.97)                                                  | 99.70% | 3.21 | 18.4 | 4.11 | 3 | 902.10 | 2,703.27 | -0.00235 |
| 315 | PE | lg | 3 min | 261 | 286 | IGAQMGPgSNAHPVTWSPGGIISR | s10: Phospho (+79.97)                                                  | 99.70% | 1.98 | 19.6 | 6.85 | 4 | 676.83 | 2,703.28 | 0.00313  |
| 316 | PE | lg | 3 min | 261 | 286 | IGAQMGPgSNAHPVTWSPGGIISR | s10: Phospho (+79.97)                                                  | 99.70% | 3.86 | 27.2 | 7.49 | 3 | 902.10 | 2,703.27 | 0.00003  |
| 317 | PE | lg | 3 min | 261 | 286 | IGAQMGPgSNAHPVTWSPGGIISR | s10: Phospho (+79.97)                                                  | 99.70% | 4.05 | 38   | 7.11 | 4 | 676.83 | 2,703.28 | 0.00094  |
| 318 | PE | lg | 3 min | 261 | 286 | IGAQMGPgSNAHPVTWSPGGIISR | s10: Phospho (+79.97)                                                  | 99.70% | 4.54 | 30.3 | 7.96 | 4 | 676.83 | 2,703.28 | 0.00338  |
| 319 | PE | lg | 3 min | 261 | 286 | IGAQMGPgSNAHPVTWSPGGIISR | s10: Phospho (+79.97)                                                  | 99.70% | 5.6  | 41.6 | 8.29 | 3 | 902.10 | 2,703.27 | -0.00326 |
| 320 | PE | lg | 3 min | 261 | 286 | IGAQMGPgSNAHPVTWSPGGIISR | s10: Phospho (+79.97)                                                  | 99.70% | 5.13 | 30.6 | 6.64 | 3 | 902.10 | 2,703.28 | 0.00351  |
| 321 | PE | lg | 3 min | 261 | 286 | IGAQMGPgSNAHPVTWSPGGIISR | s10: Phospho (+79.97)                                                  | 99.70% | 2.76 | 18   | 3.03 | 3 | 902.11 | 2,703.32 | 0.04123  |
| 322 | PE | lg | 3 min | 261 | 286 | IGAQMGPgSNAHPVTWSPGGIISR | s10: Phospho (+79.97)                                                  | 99.70% | 3.72 | 28   | 4.2  | 3 | 902.11 | 2,703.31 | 0.03501  |
| 323 | PE | lg | 3 min | 261 | 286 | IGAQMGPgSNAHPVTWSPGGIISR | s10: Phospho (+79.97)                                                  | 99.70% | 3.18 | 42   | 8.77 | 4 | 676.84 | 2,703.31 | 0.03951  |
| 324 | PE | lg | 3 min | 261 | 286 | IGAQMGPgSNAHPVTWSPGGIISR | s10: Phospho (+79.97)                                                  | 99.70% | 3.75 | 39   | 5.51 | 3 | 902.11 | 2,703.31 | 0.03885  |
| 325 | PE | lg | 5 min | 261 | 286 | IGAQMGPgSNAHPVTWSPGGIISR | s10: Phospho (+79.97)                                                  | 99.70% | 2.98 | 10.8 | 4.11 | 3 | 902.10 | 2,703.28 | 0.00699  |
| 326 | PE | lg | 5 min | 261 | 286 | IGAQMGPgSNAHPVTWSPGGIISR | s10: Phospho (+79.97)                                                  | 99.70% | 3.58 | 20.6 | 6.8  | 3 | 902.10 | 2,703.28 | 0.00937  |
| 327 | PE | lg | 5 min | 261 | 286 | IGAQMGPgSNAHPVTWSPGGIISR | s10: Phospho (+79.97)                                                  | 99.70% | 3.29 | 28.1 | 7.54 | 4 | 676.83 | 2,703.27 | -0.00273 |
| 328 | PE | lg | 5 min | 261 | 286 | IGAQMGPgSNAHPVTWSPGGIISR | s10: Phospho (+79.97)                                                  | 99.70% | 3.21 | 28.7 | 9.41 | 4 | 676.83 | 2,703.27 | -0.00151 |
| 329 | PE | lg | 5 min | 261 | 286 | IGAQMGPgSNAHPVTWSPGGIISR | s19: Phospho (+79.97)                                                  | 88.10% | 2.73 | 0    | 0    | 3 | 902.10 | 2,703.27 | -0.00052 |
| 330 | PE | lg | 5 min | 261 | 286 | IGAQMGPgSNAHPVTWSPGGIISR | s19: Phospho (+79.97)                                                  | 99.70% | 3.8  | 33   | 3.42 | 4 | 676.83 | 2,703.28 | 0.00167  |
| 331 | PE | lg | 5 min | 261 | 286 | IGAQMGPgSNAHPVTWSPGGIISR | s10: Phospho (+79.97)                                                  | 99.70% | 2.52 | 26   | 4.6  | 4 | 676.83 | 2,703.28 | 0.00435  |
| 332 | PE | lg | 5 min | 261 | 286 | IGAQMGPgSNAHPVTWSPGGIISR | s10: Phospho (+79.97)                                                  | 99.70% | 2.87 | 42   | 8.42 | 4 | 676.82 | 2,703.27 | -0.00566 |
| 333 | PE | lg | 5 min | 261 | 286 | IGAQMGPgSNAHPVTWSPGGIISR | s10: Phospho (+79.97)                                                  | 99.70% | 3.99 | 20.5 | 8.92 | 3 | 902.10 | 2,703.27 | -0.00271 |
| 334 | PE | lg | 5 min | 261 | 286 | IGAQMGPgSNAHPVTWSPGGIISR | s10: Phospho (+79.97)                                                  | 99.70% | 4.19 | 38.6 | 9.89 | 4 | 676.83 | 2,703.28 | 0.00435  |
| 335 | PE | lg | 5 min | 261 | 286 | IGAQMGPgSNAHPVTWSPGGIISR | s10: Phospho (+79.97)                                                  | 99.70% | 4.46 | 38.7 | 7.11 | 3 | 902.10 | 2,703.28 | 0.00388  |
| 336 | PE | lg | 5 min | 261 | 286 | IGAQMGPgSNAHPVTWSPGGIISR | s10: Phospho (+79.97)                                                  | 99.30% | 1.66 | 44.1 | 0    | 4 | 676.83 | 2,703.28 | 0.00899  |

|     |    |    |        |     |     |                           |                                               |        |      |      |      |   |        |          |          |
|-----|----|----|--------|-----|-----|---------------------------|-----------------------------------------------|--------|------|------|------|---|--------|----------|----------|
| 337 | PE | Ig | 5 min  | 261 | 286 | IGAQMGPgSPNAHPVTWSPGGIISR | s10: Phospho (+79.97)                         | 99.70% | 1.83 | 31.4 | 0    | 3 | 902.10 | 2,703.28 | 0.00718  |
| 338 | PE | Ig | 5 min  | 261 | 286 | IGAQMGPgSPNAHPVTWSPGGIISR | m5: Oxidation (+15.99), s10: Phospho (+79.97) | 93.70% | 2.66 | 22   | 0    | 3 | 907.44 | 2,719.31 | 0.04333  |
| 339 | PE | Ig | 5 min  | 261 | 286 | IGAQMGPgSPNAHPVTWSPGGIISR | s19: Phospho (+79.97)                         | 99.40% | 2.36 | 17   | 0    | 4 | 676.84 | 2,703.32 | 0.04677  |
| 340 | PE | Ig | 5 min  | 261 | 286 | IGAQMGPgSPNAHPVTWSPGGIISR | s10: Phospho (+79.97)                         | 99.70% | 2.59 | 30.8 | 3.72 | 3 | 902.11 | 2,703.31 | 0.03757  |
| 341 | PE | Ig | 5 min  | 261 | 286 | IGAQMGPgSPNAHPVTWSPGGIISR | s10: Phospho (+79.97)                         | 99.70% | 3.16 | 26   | 3.92 | 3 | 902.11 | 2,703.31 | 0.03977  |
| 342 | PE | Ig | 5 min  | 261 | 286 | IGAQMGPgSPNAHPVTWSPGGIISR | s10: Phospho (+79.97)                         | 99.70% | 2.84 | 20.6 | 4.7  | 3 | 902.11 | 2,703.32 | 0.04801  |
| 343 | PE | Ig | 5 min  | 261 | 286 | IGAQMGPgSPNAHPVTWSPGGIISR | s10: Phospho (+79.97)                         | 99.70% | 2.16 | 26.3 | 4.89 | 3 | 902.11 | 2,703.32 | 0.04544  |
| 344 | PE | Ig | 5 min  | 261 | 286 | IGAQMGPgSPNAHPVTWSPGGIISR | s10: Phospho (+79.97)                         | 99.70% | 2.77 | 26   | 7.06 | 3 | 902.11 | 2,703.31 | 0.03336  |
| 345 | PE | Ig | 15 min | 261 | 286 | IGAQMGPgSPNAHPVTWSPGGIISR | s10: Phospho (+79.97)                         | 99.30% | 3.21 | 0    | 2.49 | 3 | 902.10 | 2,703.28 | 0.00919  |
| 346 | PE | Ig | 15 min | 261 | 286 | IGAQMGPgSPNAHPVTWSPGGIISR | s10: Phospho (+79.97)                         | 99.70% | 3.05 | 28.1 | 7.34 | 4 | 676.83 | 2,703.28 | 0.00069  |
| 347 | PE | Ig | 15 min | 261 | 286 | IGAQMGPgSPNAHPVTWSPGGIISR | s10: Phospho (+79.97)                         | 99.70% | 4.19 | 16.7 | 7.28 | 3 | 902.09 | 2,703.25 | -0.02121 |
| 348 | PE | Ig | 15 min | 261 | 286 | IGAQMGPgSPNAHPVTWSPGGIISR | s10: Phospho (+79.97)                         | 99.70% | 3.73 | 54.1 | 7.03 | 4 | 676.83 | 2,703.29 | 0.01436  |
| 349 | PE | Ig | 15 min | 261 | 286 | IGAQMGPgSPNAHPVTWSPGGIISR | s10: Phospho (+79.97)                         | 99.70% | 5.08 | 50.9 | 10.5 | 4 | 676.83 | 2,703.28 | 0.00387  |
| 350 | PE | Ig | 15 min | 261 | 286 | IGAQMGPgSPNAHPVTWSPGGIISR | s10: Phospho (+79.97)                         | 99.70% | 3.39 | 29.1 | 10.8 | 4 | 676.83 | 2,703.27 | -0.00151 |
| 351 | PE | Ig | 15 min | 261 | 286 | IGAQMGPgSPNAHPVTWSPGGIISR | s10: Phospho (+79.97)                         | 99.70% | 5.84 | 38.2 | 7.85 | 3 | 902.10 | 2,703.27 | 0.00022  |
| 352 | PE | Ig | 15 min | 261 | 286 | IGAQMGPgSPNAHPVTWSPGGIISR | s10: Phospho (+79.97)                         | 99.10% | 0.74 | 32.8 | 0    | 4 | 676.83 | 2,703.28 | 0.00533  |
| 353 | PE | Ig | 15 min | 261 | 286 | IGAQMGPgSPNAHPVTWSPGGIISR | m5: Oxidation (+15.99), s10: Phospho (+79.97) | 99.70% | 2.41 | 15.3 | 3.04 | 3 | 907.45 | 2,719.32 | 0.04717  |
| 354 | PE | Ig | 15 min | 261 | 286 | IGAQMGPgSPNAHPVTWSPGGIISR | s10: Phospho (+79.97)                         | 99.70% | 2.92 | 17.5 | 2.66 | 3 | 902.11 | 2,703.32 | 0.04087  |
| 355 | PE | Ig | 15 min | 261 | 286 | IGAQMGPgSPNAHPVTWSPGGIISR | m5: Oxidation (+15.99), s10: Phospho (+79.97) | 99.70% | 2.72 | 16   | 3.77 | 4 | 680.84 | 2,719.32 | 0.04777  |
| 356 | PE | Ig | 15 min | 261 | 286 | IGAQMGPgSPNAHPVTWSPGGIISR | s10: Phospho (+79.97)                         | 99.70% | 1.82 | 15.3 | 3.6  | 4 | 676.83 | 2,703.31 | 0.03463  |
| 357 | PE | Ig | 15 min | 261 | 286 | IGAQMGPgSPNAHPVTWSPGGIISR | s10: Phospho (+79.97)                         | 99.70% | 3.93 | 33.3 | 5.31 | 3 | 902.11 | 2,703.31 | 0.03757  |
| 358 | PE | Ig | 15 min | 261 | 286 | IGAQMGPgSPNAHPVTWSPGGIISR | s10: Phospho (+79.97)                         | 99.70% | 2.46 | 32.7 | 5.52 | 4 | 676.84 | 2,703.31 | 0.04049  |
| 359 | PE | Ig | 15 min | 261 | 286 | IGAQMGPgSPNAHPVTWSPGGIISR | s10: Phospho (+79.97)                         | 99.70% | 1.98 | 27   | 6.35 | 4 | 676.83 | 2,703.31 | 0.03609  |
| 360 | PE | Ig | 15 min | 261 | 286 | IGAQMGPgSPNAHPVTWSPGGIISR | s10: Phospho (+79.97)                         | 99.70% | 2.65 | 38.6 | 4.7  | 3 | 902.11 | 2,703.32 | 0.04416  |
| 361 | PE | Ig | 15 min | 261 | 286 | IGAQMGPgSPNAHPVTWSPGGIISR | s10: Phospho (+79.97)                         | 99.70% | 3.18 | 59.3 | 6.59 | 3 | 902.11 | 2,703.31 | 0.03464  |
| 362 | PE | Hg | 0      | 261 | 286 | IGAQMGPgSPNAHPVTWSPGGIISR | s10: Phospho (+79.97)                         | 99.40% | 2.87 | 0    | 4.82 | 3 | 902.10 | 2,703.28 | 0.00718  |
| 363 | PE | Hg | 0      | 261 | 286 | IGAQMGPgSPNAHPVTWSPGGIISR | s10: Phospho (+79.97)                         | 99.70% | 3.6  | 37.2 | 8.15 | 4 | 676.83 | 2,703.29 | 0.01143  |
| 364 | PE | Hg | 0      | 261 | 286 | IGAQMGPgSPNAHPVTWSPGGIISR | s10: Phospho (+79.97)                         | 96.10% | 2.06 | 0    | 3.54 | 3 | 902.10 | 2,703.28 | 0.00068  |
| 365 | PE | Hg | 0      | 261 | 286 | IGAQMGPgSPNAHPVTWSPGGIISR | m5: Oxidation (+15.99), s10: Phospho (+79.97) | 99.70% | 3.1  | 36.6 | 7.24 | 4 | 680.83 | 2,719.27 | 0.00212  |
| 366 | PE | Hg | 0      | 261 | 286 | IGAQMGPgSPNAHPVTWSPGGIISR | s10: Phospho (+79.97)                         | 99.70% | 5.57 | 43.1 | 7.44 | 3 | 902.10 | 2,703.27 | -0.00125 |
| 367 | PE | Hg | 0      | 261 | 286 | IGAQMGPgSPNAHPVTWSPGGIISR | s10: Phospho (+79.97)                         | 99.70% | 3.31 | 37.8 | 9.09 | 4 | 676.83 | 2,703.28 | 0.00265  |
| 368 | PE | Hg | 0      | 261 | 286 | IGAQMGPgSPNAHPVTWSPGGIISR | s10: Phospho (+79.97)                         | 99.70% | 3.23 | 39.1 | 8.92 | 4 | 676.83 | 2,703.27 | -0.00175 |
| 369 | PE | Hg | 0      | 261 | 286 | IGAQMGPgSPNAHPVTWSPGGIISR | s10: Phospho (+79.97)                         | 84.20% | 0    | 10.3 | 0    | 3 | 902.10 | 2,703.28 | 0.00718  |
| 370 | PE | Hg | 0      | 261 | 286 | IGAQMGPgSPNAHPVTWSPGGIISR | s10: Phospho (+79.97)                         | 99.30% | 0.5  | 19.6 | 0    | 4 | 676.83 | 2,703.28 | 0.00997  |
| 371 | PE | Hg | 1 µM   | 261 | 286 | IGAQMGPgSPNAHPVTWSPGGIISR | s10: Phospho (+79.97)                         | 99.70% | 3.3  | 11.8 | 4.23 | 3 | 902.10 | 2,703.28 | 0.00809  |
| 372 | PE | Hg | 1 µM   | 261 | 286 | IGAQMGPgSPNAHPVTWSPGGIISR | s10: Phospho (+79.97)                         | 99.70% | 2.91 | 52.2 | 10.8 | 4 | 676.83 | 2,703.27 | -0.00053 |
| 373 | PE | Hg | 1 µM   | 261 | 286 | IGAQMGPgSPNAHPVTWSPGGIISR | s10: Phospho (+79.97)                         | 99.70% | 4.66 | 40.8 | 11.2 | 4 | 676.83 | 2,703.28 | 0.00728  |
| 374 | PE | Hg | 1 µM   | 261 | 286 | IGAQMGPgSPNAHPVTWSPGGIISR | s10: Phospho (+79.97)                         | 97.00% | 3.41 | 0    | 3.7  | 3 | 902.10 | 2,703.27 | -0.00747 |
| 375 | PE | Hg | 1 µM   | 261 | 286 | IGAQMGPgSPNAHPVTWSPGGIISR | s10: Phospho (+79.97)                         | 99.70% | 2.49 | 25.4 | 4.89 | 3 | 902.10 | 2,703.27 | 0.00003  |
| 376 | PE | Hg | 1 µM   | 261 | 286 | IGAQMGPgSPNAHPVTWSPGGIISR | s10: Phospho (+79.97)                         | 99.70% | 4.65 | 31.1 | 6.89 | 3 | 902.10 | 2,703.27 | -0.00638 |
| 377 | PE | Hg | 1 µM   | 261 | 286 | IGAQMGPgSPNAHPVTWSPGGIISR | s10: Phospho (+79.97)                         | 99.70% | 2.98 | 36.5 | 9.22 | 4 | 676.83 | 2,703.27 | -0.00199 |

|     |    |    |        |     |     |                           |                                               |        |      |      |      |   |        |          |          |
|-----|----|----|--------|-----|-----|---------------------------|-----------------------------------------------|--------|------|------|------|---|--------|----------|----------|
| 378 | PE | Hg | 1 µM   | 261 | 286 | IGAQMGPgsPNAHPVTWSPGGIISR | s10: Phospho (+79.97)                         | 99.70% | 3.5  | 43.8 | 10.9 | 4 | 676.83 | 2,703.27 | -0.00004 |
| 379 | PE | Hg | 5 µM   | 261 | 286 | IGAQMGPgsPNAHPVTWSPGGIISR | s10: Phospho (+79.97)                         | 99.70% | 3.72 | 20   | 6.14 | 3 | 902.10 | 2,703.28 | 0.00406  |
| 380 | PE | Hg | 5 µM   | 261 | 286 | IGAQMGPgsPNAHPVTWSPGGIISR | s10: Phospho (+79.97)                         | 99.70% | 4    | 47.2 | 10.5 | 4 | 676.83 | 2,703.27 | 0.00020  |
| 381 | PE | Hg | 5 µM   | 261 | 286 | IGAQMGPgsPNAHPVTWSPGGIISR | s10: Phospho (+79.97)                         | 99.70% | 3.92 | 52   | 10.3 | 4 | 676.83 | 2,703.28 | 0.01021  |
| 382 | PE | Hg | 5 µM   | 261 | 286 | IGAQMGPgsPNAHPVTWSPGGIISR | m5: Oxidation (+15.99), s10: Phospho (+79.97) | 99.30% | 1.65 | 19.7 | 2.89 | 3 | 907.43 | 2,719.28 | 0.01366  |
| 383 | PE | Hg | 5 µM   | 261 | 286 | IGAQMGPgsPNAHPVTWSPGGIISR | s10: Phospho (+79.97)                         | 99.70% | 3.78 | 34.8 | 8.12 | 4 | 676.82 | 2,703.27 | -0.00614 |
| 384 | PE | Hg | 5 µM   | 261 | 286 | IGAQMGPgsPNAHPVTWSPGGIISR | s10: Phospho (+79.97)                         | 99.70% | 2.92 | 36.9 | 9.32 | 4 | 676.82 | 2,703.27 | -0.00737 |
| 385 | PE | Hg | 5 µM   | 261 | 286 | IGAQMGPgsPNAHPVTWSPGGIISR | s10: Phospho (+79.97)                         | 92.70% | 0.98 | 11.9 | 0    | 3 | 902.10 | 2,703.29 | 0.01175  |
| 386 | PE | Hg | 10 µM  | 261 | 286 | IGAQMGPgsPNAHPVTWSPGGIISR | s10: Phospho (+79.97)                         | 99.70% | 3.75 | 18.8 | 4.17 | 3 | 902.10 | 2,703.28 | 0.00754  |
| 387 | PE | Hg | 10 µM  | 261 | 286 | IGAQMGPgsPNAHPVTWSPGGIISR | s10: Phospho (+79.97)                         | 99.70% | 3.3  | 28.3 | 8.44 | 4 | 676.83 | 2,703.28 | 0.00924  |
| 388 | PE | Hg | 10 µM  | 261 | 286 | IGAQMGPgsPNAHPVTWSPGGIISR | s10: Phospho (+79.97)                         | 99.70% | 4.2  | 39.8 | 8.28 | 4 | 676.83 | 2,703.28 | 0.00240  |
| 389 | PE | Hg | 10 µM  | 261 | 286 | IGAQMGPgsPNAHPVTWSPGGIISR | s10: Phospho (+79.97)                         | 99.70% | 4.62 | 50.2 | 11.6 | 4 | 676.83 | 2,703.27 | -0.00028 |
| 390 | PE | Hg | 10 µM  | 261 | 286 | IGAQMGPgsPNAHPVTWSPGGIISR | s10: Phospho (+79.97)                         | 99.70% | 3.42 | 35.2 | 7.66 | 3 | 902.10 | 2,703.28 | 0.00370  |
| 391 | PE | Hg | 10 µM  | 261 | 286 | IGAQMGPgsPNAHPVTWSPGGIISR | s10: Phospho (+79.97)                         | 99.50% | 0    | 0    | 4.29 | 3 | 902.77 | 2,705.28 | 2.00200  |
| 392 | PE | Hg | 10 µM  | 261 | 286 | IGAQMGPgsPNAHPVTWSPGGIISR | s10: Phospho (+79.97)                         | 99.70% | 3.44 | 43.2 | 7.33 | 4 | 676.82 | 2,703.27 | -0.00444 |
| 393 | PE | Hg | 10 µM  | 261 | 286 | IGAQMGPgsPNAHPVTWSPGGIISR | s10: Phospho (+79.97)                         | 99.70% | 2.99 | 39.8 | 9.15 | 4 | 676.83 | 2,703.27 | -0.00346 |
| 394 | PE | Hg | 20 µM  | 261 | 286 | IGAQMGPgsPNAHPVTWSPGGIISR | s10: Phospho (+79.97)                         | 99.70% | 3.37 | 20.7 | 4.23 | 3 | 902.10 | 2,703.28 | 0.00516  |
| 395 | PE | Hg | 20 µM  | 261 | 286 | IGAQMGPgsPNAHPVTWSPGGIISR | s10: Phospho (+79.97)                         | 99.70% | 4.08 | 53.7 | 8.85 | 4 | 676.83 | 2,703.29 | 0.01388  |
| 396 | PE | Hg | 20 µM  | 261 | 286 | IGAQMGPgsPNAHPVTWSPGGIISR | s10: Phospho (+79.97)                         | 99.70% | 3.68 | 42.8 | 9.04 | 4 | 676.83 | 2,703.28 | 0.00850  |
| 397 | PE | Hg | 20 µM  | 261 | 286 | IGAQMGPgsPNAHPVTWSPGGIISR | s10: Phospho (+79.97)                         | 99.70% | 3.25 | 17.2 | 2.42 | 3 | 902.10 | 2,703.27 | -0.00180 |
| 398 | PE | Hg | 20 µM  | 261 | 286 | IGAQMGPgsPNAHPVTWSPGGIISR | s10: Phospho (+79.97)                         | 99.70% | 3.72 | 34.9 | 8.92 | 4 | 676.82 | 2,703.26 | -0.01054 |
| 399 | PE | Hg | 20 µM  | 261 | 286 | IGAQMGPgsPNAHPVTWSPGGIISR | s10: Phospho (+79.97)                         | 99.70% | 3.26 | 27.2 | 9.38 | 4 | 676.83 | 2,703.27 | 0.00045  |
| 400 | PE | Hg | 20 µM  | 261 | 286 | IGAQMGPgsPNAHPVTWSPGGIISR | s10: Phospho (+79.97)                         | 99.70% | 4.62 | 38.3 | 5.89 | 3 | 902.10 | 2,703.27 | -0.00143 |
| 401 | PE | Hg | 20 µM  | 261 | 286 | IGAQMGPgsPNAHPVTWSPGGIISR | s10: Phospho (+79.97)                         | 99.70% | 1.26 | 36.4 | 3.1  | 4 | 676.83 | 2,703.28 | 0.01046  |
| 402 | PE | Hg | 20 µM  | 261 | 286 | IGAQMGPgsPNAHPVTWSPGGIISR | s10: Phospho (+79.97)                         | 99.70% | 1.31 | 31.4 | 0.96 | 3 | 902.10 | 2,703.29 | 0.01596  |
| 403 | PE | Hg | 50 µM  | 261 | 286 | IGAQMGPgsPNAHPVTWSPGGIISR | s10: Phospho (+79.97)                         | 99.70% | 4.11 | 36.2 | 7.64 | 4 | 676.83 | 2,703.28 | 0.00631  |
| 404 | PE | Hg | 50 µM  | 261 | 286 | IGAQMGPgsPNAHPVTWSPGGIISR | s10: Phospho (+79.97)                         | 99.70% | 3.96 | 29.6 | 9.26 | 4 | 676.83 | 2,703.28 | 0.00094  |
| 405 | PE | Hg | 50 µM  | 261 | 286 | IGAQMGPgsPNAHPVTWSPGGIISR | s10: Phospho (+79.97)                         | 99.70% | 3.84 | 16.3 | 5.21 | 3 | 902.10 | 2,703.27 | -0.00015 |
| 406 | PE | Hg | 50 µM  | 261 | 286 | IGAQMGPgsPNAHPVTWSPGGIISR | s10: Phospho (+79.97)                         | 99.70% | 4.4  | 26.2 | 5.64 | 3 | 902.10 | 2,703.27 | -0.00125 |
| 407 | PE | Hg | 50 µM  | 261 | 286 | IGAQMGPgsPNAHPVTWSPGGIISR | s10: Phospho (+79.97)                         | 99.70% | 3.26 | 45.3 | 11.9 | 4 | 676.83 | 2,703.27 | -0.00077 |
| 408 | PE | Hg | 50 µM  | 261 | 286 | IGAQMGPgsPNAHPVTWSPGGIISR | s10: Phospho (+79.97)                         | 99.70% | 0.77 | 25.1 | 1.15 | 3 | 902.10 | 2,703.29 | 0.01120  |
| 409 | PE | Hg | 100 µM | 261 | 286 | IGAQMGPgsPNAHPVTWSPGGIISR | s10: Phospho (+79.97)                         | 99.70% | 0    | 33.3 | 7.34 | 4 | 676.83 | 2,703.28 | 0.00631  |
| 410 | PE | Hg | 100 µM | 261 | 286 | IGAQMGPgsPNAHPVTWSPGGIISR | s10: Phospho (+79.97)                         | 99.70% | 3.31 | 15.9 | 5.96 | 3 | 902.10 | 2,703.27 | -0.00052 |
| 411 | PE | Hg | 100 µM | 261 | 286 | IGAQMGPgsPNAHPVTWSPGGIISR | s10: Phospho (+79.97)                         | 99.70% | 1.99 | 28.1 | 8.32 | 4 | 676.82 | 2,703.27 | -0.00395 |
| 412 | PE | Hg | 100 µM | 261 | 286 | IGAQMGPgsPNAHPVTWSPGGIISR | s10: Phospho (+79.97)                         | 99.70% | 2.71 | 39.3 | 10.6 | 4 | 676.82 | 2,703.27 | -0.00932 |
| 413 | PE | PV | 0      | 261 | 286 | IGAQMGPgsPNAHPVTWsPGGIISR | s10: Phospho (+79.97), s19: Phospho (+79.97)  | 99.20% | 3.16 | 25.8 | 2.08 | 3 | 928.75 | 2,783.24 | -0.00469 |
| 414 | PE | PV | 0      | 261 | 286 | IGAQMGPgsPNAHPVTWSPGGIISR | s10: Phospho (+79.97)                         | 99.70% | 4.61 | 0    | 3.41 | 3 | 902.10 | 2,703.27 | -0.00161 |
| 415 | PE | PV | 0      | 261 | 286 | IGAQMGPgsPNAHPVTWSPGGIISR | s10: Phospho (+79.97)                         | 99.70% | 3.36 | 20.8 | 7.68 | 4 | 676.82 | 2,703.27 | -0.00590 |
| 416 | PE | PV | 0      | 261 | 286 | IGAQMGPgsPNAHPVTWSPGGIISR | s10: Phospho (+79.97)                         | 99.70% | 4.99 | 41.2 | 10.5 | 4 | 676.83 | 2,703.27 | -0.00077 |
| 417 | PE | PV | 0      | 261 | 286 | IGAQMGPgsPNAHPVTWsPGGIISR | s19: Phospho (+79.97)                         | 99.70% | 3.13 | 16.9 | 1.42 | 3 | 902.10 | 2,703.27 | 0.00003  |
| 418 | PE | PV | 0      | 261 | 286 | IGAQMGPgsPNAHPVTWSPGGIISR | s10: Phospho (+79.97)                         | 99.70% | 5.75 | 31.8 | 6.39 | 3 | 902.10 | 2,703.28 | 0.00150  |
| 419 | PE | PV | 1 µM   | 261 | 286 | IGAQMGPgsPNAHPVTWSPGGIISR | s10: Phospho (+79.97)                         | 99.70% | 2.7  | 22.2 | 7.13 | 4 | 676.83 | 2,703.28 | 0.00435  |
| 420 | PE | PV | 1 µM   | 261 | 286 | IGAQMGPgsPNAHPVTWsPGGIISR | s19: Phospho (+79.97)                         | 99.40% | 1.86 | 10.4 | 0    | 4 | 676.83 | 2,703.28 | 0.00435  |

|     |    |    |        |     |     |                          |                                               |        |      |      |      |   |        |          |          |
|-----|----|----|--------|-----|-----|--------------------------|-----------------------------------------------|--------|------|------|------|---|--------|----------|----------|
| 421 | PE | PV | 1 µM   | 261 | 286 | IGAQMGPgSNAHPVTWSPGGIISR | s10: Phospho (+79.97)                         | 99.70% | 4.48 | 50.3 | 10.8 | 4 | 676.83 | 2,703.28 | 0.00655  |
| 422 | PE | PV | 3 µM   | 261 | 286 | IGAQMGPgSNAHPVTWSPGGIISR | s10: Phospho (+79.97)                         | 99.70% | 2.39 | 12.2 | 5.12 | 3 | 902.10 | 2,703.28 | 0.00296  |
| 423 | PE | PV | 3 µM   | 261 | 286 | IGAQMGPgSNAHPVTWSPGGIISR | s10: Phospho (+79.97)                         | 99.70% | 2.79 | 25.5 | 6.77 | 4 | 676.83 | 2,703.28 | 0.00655  |
| 424 | PE | PV | 3 µM   | 261 | 286 | IGAQMGPgSNAHPVTWSPGGIISR | s10: Phospho (+79.97)                         | 99.70% | 3.82 | 32.7 | 10.2 | 4 | 676.83 | 2,703.28 | 0.00460  |
| 425 | PE | PV | 10 µM  | 261 | 286 | IGAQMGPgSNAHPVTWSPGGIISR | s10: Phospho (+79.97)                         | 99.70% | 3.69 | 25.2 | 6.8  | 3 | 902.10 | 2,703.28 | 0.00919  |
| 426 | PE | PV | 10 µM  | 261 | 286 | IGAQMGPgSNAHPVTWSPGGIISR | s10: Phospho (+79.97)                         | 99.70% | 4.09 | 26   | 6.92 | 4 | 676.83 | 2,703.28 | 0.00411  |
| 427 | PE | PV | 10 µM  | 261 | 286 | IGAQMGPgSNAHPVTWSPGGIISR | s10: Phospho (+79.97)                         | 99.70% | 2.35 | 26   | 8.48 | 4 | 676.83 | 2,703.28 | 0.00094  |
| 428 | PE | PV | 10 µM  | 261 | 286 | IGAQMGPgSNAHPVTWSPGGIISR | s10: Phospho (+79.97)                         | 99.70% | 2.97 | 26.4 | 9.31 | 4 | 676.83 | 2,703.28 | 0.00094  |
| 429 | PE | PV | 30 µM  | 261 | 286 | IGAQMGPgSNAHPVTWSPGGIISR | s10: Phospho (+79.97)                         | 99.70% | 2.82 | 16.2 | 5.77 | 3 | 902.10 | 2,703.28 | 0.00480  |
| 430 | PE | PV | 30 µM  | 261 | 286 | IGAQMGPgSNAHPVTWSPGGIISR | s10: Phospho (+79.97)                         | 99.70% | 3.76 | 29.8 | 5.77 | 3 | 902.10 | 2,703.28 | 0.00498  |
| 431 | PE | PV | 30 µM  | 261 | 286 | IGAQMGPgSNAHPVTWSPGGIISR | s10: Phospho (+79.97)                         | 99.70% | 2.4  | 17.4 | 5.96 | 4 | 676.83 | 2,703.28 | 0.00704  |
| 432 | PE | PV | 30 µM  | 261 | 286 | IGAQMGPgSNAHPVTWSPGGIISR | s10: Phospho (+79.97)                         | 99.70% | 2.76 | 0    | 7.06 | 3 | 902.10 | 2,703.28 | 0.00461  |
| 433 | PE | PV | 30 µM  | 261 | 286 | IGAQMGPgSNAHPVTWSPGGIISR | s10: Phospho (+79.97)                         | 99.70% | 4.09 | 24.3 | 6.89 | 4 | 676.83 | 2,703.28 | 0.00728  |
| 434 | PE | PV | 30 µM  | 261 | 286 | IGAQMGPgSNAHPVTWSPGGIISR | s10: Phospho (+79.97)                         | 99.70% | 3.61 | 31.8 | 7.7  | 4 | 676.83 | 2,703.27 | -0.00151 |
| 435 | PE | PV | 30 µM  | 261 | 286 | IGAQMGPgSNAHPVTWSPGGIISR | s10: Phospho (+79.97)                         | 99.70% | 5.06 | 53.8 | 10.2 | 4 | 676.83 | 2,703.27 | -0.00151 |
| 436 | PE | PV | 30 µM  | 261 | 286 | IGAQMGPgSNAHPVTWSPGGIISR | s10: Phospho (+79.97)                         | 99.70% | 3.77 | 38.8 | 11.1 | 4 | 676.83 | 2,703.27 | -0.00004 |
| 437 | PE | PV | 30 µM  | 261 | 286 | IGAQMGPgSNAHPVTWSPGGIISR | s10: Phospho (+79.97)                         | 99.70% | 0.94 | 24.2 | 1.33 | 3 | 902.10 | 2,703.28 | 0.00205  |
| 438 | PE | PV | 100 µM | 261 | 286 | IGAQMGPgSNAHPVTWSPGGIISR | s10: Phospho (+79.97)                         | 99.70% | 4.39 | 35.4 | 5.82 | 3 | 902.10 | 2,703.28 | 0.00406  |
| 439 | PE | PV | 100 µM | 261 | 286 | IGAQMGPgSNAHPVTWSPGGIISR | s10: Phospho (+79.97)                         | 99.70% | 4.1  | 52.1 | 9.35 | 4 | 676.83 | 2,703.27 | -0.00126 |
| 440 | PE | PV | 100 µM | 261 | 286 | IGAQMGPgSNAHPVTWSPGGIISR | m5: Oxidation (+15.99), s10: Phospho (+79.97) | 99.70% | 4.63 | 25.2 | 9.47 | 3 | 907.43 | 2,719.26 | -0.00758 |
| 441 | PE | PV | 100 µM | 261 | 286 | IGAQMGPgSNAHPVTWSPGGIISR | m5: Oxidation (+15.99), s10: Phospho (+79.97) | 99.70% | 3.6  | 31.6 | 9.47 | 4 | 680.82 | 2,719.27 | -0.00228 |
| 442 | IP | PV | 0      | 287 | 298 | IKSySFPKPGHK             | y4: Phospho (+79.97)                          | 99.70% | 1.45 | 21.4 | 2.02 | 3 | 490.25 | 1,467.73 | -0.00127 |
| 443 | PE | Ig | NT     | 287 | 298 | IKSySFPKPGHK             | s5: Phospho (+79.97)                          | 96.90% | 1.68 | 17   | 0    | 3 | 490.25 | 1,467.72 | -0.00457 |
| 444 | PE | Ig | 2 min  | 287 | 298 | IKSySFPKPGHK             | y4: Phospho (+79.97)                          | 99.70% | 2.4  | 29.5 | 0    | 3 | 490.25 | 1,467.73 | -0.00191 |
| 445 | PE | Ig | 2 min  | 287 | 298 | IKSysFPKPGHK             | y4: Phospho (+79.97), s5: Phospho (+79.97)    | 99.70% | 1.7  | 19.7 | 0    | 3 | 516.91 | 1,547.70 | 0.00307  |
| 446 | PE | Ig | 3 min  | 287 | 298 | IKSysFPKPGHK             | y4: Phospho (+79.97), s5: Phospho (+79.97)    | 97.90% | 1.46 | 13.4 | 0    | 3 | 516.91 | 1,547.70 | 0.00124  |
| 447 | PE | Ig | 3 min  | 287 | 298 | IKSySFPKPGHK             | y4: Phospho (+79.97)                          | 99.70% | 2.56 | 22   | 0    | 3 | 490.25 | 1,467.72 | -0.00502 |
| 448 | PE | Ig | 5 min  | 287 | 298 | IKSySFPKPGHK             | y4: Phospho (+79.97)                          | 85.30% | 1.57 | 14.5 | 0    | 3 | 490.25 | 1,467.72 | -0.00292 |
| 449 | PE | Hg | 10 µM  | 287 | 298 | IKSySFPKPGHK             | y4: Phospho (+79.97)                          | 99.70% | 1.82 | 19.6 | 2    | 3 | 490.25 | 1,467.72 | -0.00457 |
| 450 | PE | Hg | 50 µM  | 287 | 298 | IKSysFPKPGHK             | y4: Phospho (+79.97), s5: Phospho (+79.97)    | 99.70% | 1.81 | 16.3 | 0    | 3 | 516.91 | 1,547.70 | 0.00289  |
| 451 | PE | PV | 10 µM  | 287 | 298 | IKSysFPKPGHK             | y4: Phospho (+79.97), s5: Phospho (+79.97)    | 99.70% | 3    | 22.2 | 1.2  | 3 | 516.91 | 1,547.70 | 0.00380  |
| 452 | PE | PV | 10 µM  | 287 | 298 | IKSySFPKPGHK             | s3: Phospho (+79.97), s5: Phospho (+79.97)    | 99.70% | 2.68 | 11.2 | 1.55 | 3 | 516.91 | 1,547.70 | 0.00399  |
| 453 | PE | PV | 10 µM  | 287 | 298 | IKSysFPKPGHK             | y4: Phospho (+79.97), s5: Phospho (+79.97)    | 99.70% | 3.13 | 23   | 0    | 3 | 516.91 | 1,547.70 | 0.00435  |
| 454 | PE | PV | 10 µM  | 287 | 298 | IKSySFPKPGHK             | s3: Phospho (+79.97), s5: Phospho (+79.97)    | 99.70% | 2.87 | 17.7 | 0    | 3 | 516.91 | 1,547.70 | 0.00271  |
| 455 | PE | PV | 10 µM  | 287 | 298 | IKSysFPKPGHK             | y4: Phospho (+79.97), s5: Phospho (+79.97)    | 99.70% | 3.17 | 15.2 | 0    | 3 | 516.91 | 1,547.70 | 0.00380  |

|     |    |    |       |     |     |              |                                                                  |        |      |      |      |   |        |          |          |
|-----|----|----|-------|-----|-----|--------------|------------------------------------------------------------------|--------|------|------|------|---|--------|----------|----------|
| 456 | PE | PV | 10 µM | 287 | 298 | IKSysFPKPGHK | y4: Phospho (+79.97), s5: Phospho (+79.97)                       | 99.70% | 3.8  | 25.5 | 0    | 3 | 516.91 | 1,547.70 | 0.00325  |
| 457 | PE | PV | 10 µM | 287 | 298 | IKsYsFPKPGHK | s3: Phospho (+79.97), s5: Phospho (+79.97)                       | 87.20% | 2.73 | 0    | 0    | 3 | 516.91 | 1,547.70 | 0.00142  |
| 458 | PE | PV | 10 µM | 287 | 298 | IKsYsFPKPGHK | s3: Phospho (+79.97), s5: Phospho (+79.97)                       | 95.90% | 3.16 | 0    | 0    | 3 | 516.91 | 1,547.70 | 0.00124  |
| 459 | PE | PV | 10 µM | 287 | 298 | IKSysFPKPGHK | y4: Phospho (+79.97), s5: Phospho (+79.97)                       | 99.50% | 1.98 | 11.5 | 0    | 3 | 516.91 | 1,547.69 | -0.00023 |
| 460 | PE | PV | 10 µM | 287 | 298 | IKSysFPKPGHK | y4: Phospho (+79.97), s5: Phospho (+79.97)                       | 99.70% | 2.02 | 14.4 | 0    | 3 | 516.91 | 1,547.69 | -0.00004 |
| 461 | PE | PV | 10 µM | 287 | 298 | IKsYSFPKPGHK | s3: Phospho (+79.97)                                             | 97.00% | 0.5  | 19.3 | 0    | 2 | 734.87 | 1,467.73 | 0.00323  |
| 462 | PE | PV | 10 µM | 287 | 298 | IKsysFPKPGHK | s3: Phospho (+79.97), y4: Phospho (+79.97), s5: Phospho (+79.97) | 98.60% | 0.92 | 13.8 | 0    | 2 | 814.84 | 1,627.66 | 0.00440  |
| 463 | PE | PV | 10 µM | 287 | 298 | IKsYsFPKPGHK | s3: Phospho (+79.97), s5: Phospho (+79.97)                       | 99.70% | 1.22 | 0    | 0.96 | 3 | 516.91 | 1,547.70 | 0.00563  |
| 464 | PE | PV | 10 µM | 287 | 298 | IKsysFPKPGHK | s3: Phospho (+79.97), y4: Phospho (+79.97), s5: Phospho (+79.97) | 99.70% | 1.73 | 11.7 | 0    | 3 | 543.56 | 1,627.67 | 0.00695  |
| 465 | PE | PV | 10 µM | 287 | 298 | IKSysFPKPGHK | y4: Phospho (+79.97), s5: Phospho (+79.97)                       | 99.70% | 1.35 | 0    | 1.2  | 3 | 516.91 | 1,547.70 | 0.00344  |
| 466 | PE | PV | 10 µM | 287 | 298 | IKsysFPKPGHK | s3: Phospho (+79.97), y4: Phospho (+79.97), s5: Phospho (+79.97) | 99.70% | 1.85 | 11.8 | 1.54 | 3 | 543.56 | 1,627.67 | 0.00622  |
| 467 | PE | PV | 10 µM | 287 | 298 | IKsYsFPKPGHK | y4: Phospho (+79.97)                                             | 99.70% | 2.55 | 59.7 | 6.17 | 2 | 734.87 | 1,467.73 | 0.00006  |
| 468 | PE | PV | 10 µM | 287 | 298 | IKsYSFPKPGHK | s3: Phospho (+79.97)                                             | 99.70% | 2.35 | 17.2 | 2.1  | 3 | 490.25 | 1,467.73 | 0.00230  |
| 469 | PE | PV | 10 µM | 287 | 298 | IKSysFPKPGHK | y4: Phospho (+79.97), s5: Phospho (+79.97)                       | 99.70% | 2.53 | 60.4 | 2.66 | 2 | 774.86 | 1,547.70 | 0.00296  |
| 470 | PE | PV | 10 µM | 287 | 298 | IKsYsFPKPGHK | s3: Phospho (+79.97), s5: Phospho (+79.97)                       | 99.70% | 2.89 | 19   | 1.64 | 3 | 516.91 | 1,547.70 | 0.00948  |
| 471 | PE | PV | 10 µM | 287 | 298 | IKSysFPKPGHK | y4: Phospho (+79.97), s5: Phospho (+79.97)                       | 99.70% | 3.4  | 32   | 1.85 | 3 | 516.91 | 1,547.70 | 0.00692  |
| 472 | PE | PV | 10 µM | 287 | 298 | IKsYsFPKPGHK | y4: Phospho (+79.97)                                             | 99.70% | 3.02 | 32.4 | 3.27 | 3 | 490.25 | 1,467.73 | 0.00111  |
| 473 | PE | PV | 10 µM | 287 | 298 | IKSysFPKPGHK | y4: Phospho (+79.97), s5: Phospho (+79.97)                       | 98.60% | 1.61 | 13.2 | 0    | 2 | 774.87 | 1,547.72 | 0.02542  |
| 474 | PE | PV | 10 µM | 287 | 298 | IKSysFPKPGHK | y4: Phospho (+79.97), s5: Phospho (+79.97)                       | 99.50% | 2.52 | 16.9 | 0    | 3 | 516.91 | 1,547.72 | 0.02431  |
| 475 | PE | PV | 10 µM | 287 | 298 | IKsYsFPKPGHK | s3: Phospho (+79.97), s5: Phospho (+79.97)                       | 99.70% | 2.79 | 23.7 | 0    | 3 | 516.91 | 1,547.72 | 0.02578  |
| 476 | PE | PV | 10 µM | 287 | 298 | IKsysFPKPGHK | s3: Phospho (+79.97), y4: Phospho (+79.97), s5: Phospho (+79.97) | 84.80% | 1.12 | 19.9 | 0    | 3 | 543.56 | 1,627.66 | 0.00219  |
| 477 | PE | PV | 10 µM | 287 | 298 | IKsYsFPKPGHK | y4: Phospho (+79.97)                                             | 99.70% | 0.76 | 20.3 | 2.46 | 2 | 734.87 | 1,467.73 | 0.00115  |
| 478 | PE | PV | 10 µM | 287 | 298 | IKSysFPKPGHK | y4: Phospho (+79.97), s5: Phospho (+79.97)                       | 99.70% | 2.5  | 43.9 | 1.42 | 2 | 774.86 | 1,547.70 | 0.00223  |

|     |    |    |       |     |     |              |                                            |        |      |      |      |   |        |          |          |
|-----|----|----|-------|-----|-----|--------------|--------------------------------------------|--------|------|------|------|---|--------|----------|----------|
| 479 | PE | PV | 30 µM | 287 | 298 | IKsYsFPKPGHK | s3: Phospho (+79.97), s5: Phospho (+79.97) | 82.80% | 1.48 | 13.2 | 0    | 3 | 516.91 | 1,547.70 | 0.00234  |
| 480 | PE | PV | 30 µM | 287 | 298 | IKsYsFPKPGHK | s3: Phospho (+79.97), s5: Phospho (+79.97) | 91.00% | 2.23 | 0    | 0    | 3 | 516.91 | 1,547.70 | 0.00289  |
| 481 | PE | PV | 30 µM | 287 | 298 | IKSysFPKPGHK | y4: Phospho (+79.97), s5: Phospho (+79.97) | 95.00% | 1.29 | 17   | 0.59 | 3 | 516.91 | 1,547.70 | 0.00179  |
| 482 | PE | PV | 30 µM | 287 | 298 | IKsYsFPKPGHK | s3: Phospho (+79.97), s5: Phospho (+79.97) | 99.70% | 2.44 | 14.9 | 1.55 | 3 | 516.91 | 1,547.70 | 0.00289  |
| 483 | PE | PV | 30 µM | 287 | 298 | IKSysFPKPGHK | y4: Phospho (+79.97), s5: Phospho (+79.97) | 99.70% | 2.35 | 17.5 | 1.57 | 3 | 516.91 | 1,547.70 | 0.00179  |
| 484 | PE | PV | 30 µM | 287 | 298 | IKSYsFPKPGHK | s5: Phospho (+79.97)                       | 97.90% | 1.72 | 14.8 | 1.35 | 3 | 490.25 | 1,467.73 | 0.00615  |
| 485 | PE | PV | 30 µM | 287 | 298 | IKSySFPKPGHK | y4: Phospho (+79.97)                       | 99.30% | 1.88 | 19.9 | 2.77 | 3 | 490.25 | 1,467.73 | 0.00560  |
| 486 | PE | PV | 30 µM | 287 | 298 | IKSysFPKPGHK | y4: Phospho (+79.97), s5: Phospho (+79.97) | 99.70% | 2.71 | 14.8 | 0    | 3 | 516.91 | 1,547.70 | 0.00325  |
| 487 | PE | PV | 30 µM | 287 | 298 | IKSysFPKPGHK | y4: Phospho (+79.97), s5: Phospho (+79.97) | 99.70% | 3.23 | 21.8 | 0    | 3 | 516.91 | 1,547.70 | 0.00472  |
| 488 | PE | PV | 30 µM | 287 | 298 | IKSysFPKPGHK | y4: Phospho (+79.97), s5: Phospho (+79.97) | 99.70% | 3.24 | 21.9 | 1.41 | 3 | 516.91 | 1,547.70 | 0.00362  |
| 489 | PE | PV | 30 µM | 287 | 298 | IKsYsFPKPGHK | s3: Phospho (+79.97), s5: Phospho (+79.97) | 99.70% | 3.04 | 11.2 | 0    | 3 | 516.91 | 1,547.70 | 0.00234  |
| 490 | PE | PV | 30 µM | 287 | 298 | IKsYsFPKPGHK | s3: Phospho (+79.97), s5: Phospho (+79.97) | 99.70% | 3.34 | 20   | 0    | 3 | 516.91 | 1,547.70 | 0.00527  |
| 491 | PE | PV | 30 µM | 287 | 298 | IKSYsFPKPGHK | s5: Phospho (+79.97)                       | 99.60% | 2.02 | 16.4 | 0    | 3 | 490.25 | 1,467.73 | 0.00157  |
| 492 | PE | PV | 30 µM | 287 | 298 | IKSYsFPKPGHK | s5: Phospho (+79.97)                       | 99.70% | 2.2  | 17.6 | 0    | 3 | 490.25 | 1,467.73 | -0.00017 |
| 493 | PE | PV | 30 µM | 287 | 298 | IKsYsFPKPGHK | s3: Phospho (+79.97), s5: Phospho (+79.97) | 99.70% | 3.38 | 14.8 | 0    | 3 | 516.91 | 1,547.69 | 0.00014  |
| 494 | PE | PV | 30 µM | 287 | 298 | IKSysFPKPGHK | y4: Phospho (+79.97), s5: Phospho (+79.97) | 99.70% | 3.26 | 26.5 | 0    | 3 | 516.91 | 1,547.70 | 0.00124  |
| 495 | PE | PV | 30 µM | 287 | 298 | IKSysFPKPGHK | y4: Phospho (+79.97), s5: Phospho (+79.97) | 99.70% | 3.81 | 27.5 | 1.32 | 3 | 516.91 | 1,547.69 | -0.00041 |
| 496 | PE | PV | 30 µM | 287 | 298 | IKSysFPKPGHK | y4: Phospho (+79.97), s5: Phospho (+79.97) | 96.60% | 0.92 | 25.7 | 0    | 2 | 774.85 | 1,547.69 | -0.00058 |
| 497 | PE | PV | 30 µM | 287 | 298 | IKsYsFPKPGHK | s3: Phospho (+79.97), s5: Phospho (+79.97) | 97.70% | 1.29 | 16.8 | 0    | 3 | 516.91 | 1,547.70 | 0.00673  |
| 498 | PE | PV | 30 µM | 287 | 298 | IKSYsFPKPGHK | s5: Phospho (+79.97)                       | 99.70% | 0.9  | 26.6 | 3.19 | 2 | 734.87 | 1,467.73 | -0.00104 |
| 499 | PE | PV | 30 µM | 287 | 298 | IKSysFPKPGHK | y4: Phospho (+79.97), s5: Phospho (+79.97) | 99.70% | 1.89 | 27.2 | 0.55 | 2 | 774.86 | 1,547.70 | 0.00186  |
| 500 | PE | PV | 30 µM | 287 | 298 | IKSySFPKPGHK | y4: Phospho (+79.97)                       | 99.70% | 3.08 | 45.3 | 6.36 | 2 | 734.87 | 1,467.73 | -0.00104 |
| 501 | PE | PV | 30 µM | 287 | 298 | IKSySFPKPGHK | y4: Phospho (+79.97)                       | 99.70% | 2.75 | 19.6 | 3.42 | 3 | 490.25 | 1,467.73 | -0.00063 |
| 502 | PE | PV | 30 µM | 287 | 298 | IKsYsFPKPGHK | s3: Phospho (+79.97), s5: Phospho (+79.97) | 99.70% | 2.6  | 11.7 | 2    | 3 | 516.91 | 1,547.70 | 0.00563  |
| 503 | PE | PV | 30 µM | 287 | 298 | IKSysFPKPGHK | y4: Phospho (+79.97), s5: Phospho (+79.97) | 99.70% | 3.58 | 38.9 | 2.77 | 2 | 774.86 | 1,547.70 | 0.00296  |
| 504 | PE | PV | 30 µM | 287 | 298 | IKSySFPKPGHK | y4: Phospho (+79.97)                       | 99.70% | 2.68 | 34.8 | 3.32 | 3 | 490.25 | 1,467.73 | 0.00111  |

|     |    |    |       |     |     |              |                                                                  |        |      |      |      |   |        |          |          |
|-----|----|----|-------|-----|-----|--------------|------------------------------------------------------------------|--------|------|------|------|---|--------|----------|----------|
| 505 | PE | PV | 30 µM | 287 | 298 | IKSysFPKPGHK | y4: Phospho (+79.97), s5: Phospho (+79.97)                       | 99.70% | 3.09 | 24.2 | 1.52 | 3 | 516.91 | 1,547.71 | 0.01223  |
| 506 | PE | PV | 30 µM | 287 | 298 | IKsYsFPKPGHK | s3: Phospho (+79.97), s5: Phospho (+79.97)                       | 82.00% | 2.78 | 10.2 | 0    | 3 | 516.91 | 1,547.72 | 0.02340  |
| 507 | PE | PV | 30 µM | 287 | 298 | IKsYsFPKPGHK | s3: Phospho (+79.97), s5: Phospho (+79.97)                       | 97.30% | 2.21 | 14.4 | 0    | 3 | 516.91 | 1,547.72 | 0.02523  |
| 508 | PE | PV | 30 µM | 287 | 298 | IKsYsFPKPGHK | s3: Phospho (+79.97), s5: Phospho (+79.97)                       | 99.10% | 2.64 | 19.9 | 0    | 3 | 516.91 | 1,547.72 | 0.02431  |
| 509 | PE | PV | 30 µM | 287 | 298 | IKSYsFPKPGHK | s5: Phospho (+79.97)                                             | 99.30% | 1.9  | 19.7 | 0    | 3 | 490.26 | 1,467.75 | 0.02290  |
| 510 | PE | PV | 30 µM | 287 | 298 | IKsYsFPKPGHK | s3: Phospho (+79.97), s5: Phospho (+79.97)                       | 99.50% | 1.84 | 11.1 | 0    | 2 | 774.87 | 1,547.72 | 0.02188  |
| 511 | PE | PV | 30 µM | 287 | 298 | IKSysFPKPGHK | y4: Phospho (+79.97), s5: Phospho (+79.97)                       | 99.60% | 1.98 | 37.4 | 0    | 2 | 774.87 | 1,547.72 | 0.02249  |
| 512 | PE | PV | 30 µM | 287 | 298 | IKSYsFPKPGHK | s5: Phospho (+79.97)                                             | 99.70% | 2.23 | 34.8 | 0    | 3 | 490.26 | 1,467.75 | 0.02253  |
| 513 | PE | PV | 30 µM | 287 | 298 | IKSysFPKPGHK | y4: Phospho (+79.97), s5: Phospho (+79.97)                       | 99.70% | 3.02 | 18.2 | 0    | 3 | 516.91 | 1,547.72 | 0.02468  |
| 514 | PE | PV | 30 µM | 287 | 298 | IKSysFPKPGHK | y4: Phospho (+79.97), s5: Phospho (+79.97)                       | 99.70% | 2.41 | 34   | 0    | 2 | 774.86 | 1,547.72 | 0.02127  |
| 515 | PE | PV | 30 µM | 287 | 298 | IKSySFPKPGHK | y4: Phospho (+79.97)                                             | 86.50% | 1.39 | 0    | 1.36 | 4 | 367.94 | 1,467.73 | 0.00491  |
| 516 | PE | PV | 30 µM | 287 | 298 | IKsYsFPKPGHK | s3: Phospho (+79.97), s5: Phospho (+79.97)                       | 97.80% | 1.7  | 0    | 0    | 3 | 516.91 | 1,547.70 | 0.00106  |
| 517 | PE | PV | 30 µM | 287 | 298 | IKsYsFPKPGHK | s3: Phospho (+79.97), s5: Phospho (+79.97)                       | 98.20% | 1.07 | 17.2 | 0    | 2 | 774.85 | 1,547.69 | -0.00046 |
| 518 | PE | PV | 30 µM | 287 | 298 | IKSYsFPKPGHK | s3: Phospho (+79.97)                                             | 99.00% | 1.48 | 0    | 0    | 3 | 490.25 | 1,467.73 | 0.00111  |
| 519 | PE | PV | 30 µM | 287 | 298 | IKsYsFPKPGHK | s3: Phospho (+79.97), s5: Phospho (+79.97)                       | 99.10% | 1.8  | 10.2 | 0    | 3 | 516.91 | 1,547.70 | 0.00197  |
| 520 | PE | PV | 30 µM | 287 | 298 | IKSySFPKPGHK | y4: Phospho (+79.97)                                             | 99.70% | 1.84 | 30.9 | 2.15 | 2 | 734.87 | 1,467.73 | 0.00299  |
| 521 | PE | PV | 30 µM | 287 | 298 | IKsYsFPKPGHK | s3: Phospho (+79.97), s5: Phospho (+79.97)                       | 99.70% | 1.79 | 10.9 | 1.66 | 3 | 516.91 | 1,547.70 | 0.00234  |
| 522 | PE | PV | 30 µM | 287 | 298 | IKsYsFPKPGHK | s3: Phospho (+79.97), s5: Phospho (+79.97)                       | 99.70% | 1.96 | 0    | 1.96 | 3 | 516.91 | 1,547.70 | 0.00454  |
| 523 | PE | PV | 30 µM | 287 | 298 | IKsysFPKPGHK | s3: Phospho (+79.97), y4: Phospho (+79.97), s5: Phospho (+79.97) | 99.70% | 1.95 | 10.2 | 1.13 | 3 | 543.56 | 1,627.66 | -0.00147 |
| 524 | PE | PV | 30 µM | 287 | 298 | IKsYsFPKPGHK | s3: Phospho (+79.97), s5: Phospho (+79.97)                       | 99.70% | 1.91 | 14   | 1.6  | 3 | 516.91 | 1,547.70 | 0.00216  |
| 525 | PE | PV | 30 µM | 287 | 298 | IKsysFPKPGHK | s3: Phospho (+79.97), y4: Phospho (+79.97), s5: Phospho (+79.97) | 99.70% | 1.82 | 13.3 | 0    | 3 | 543.56 | 1,627.66 | 0.00110  |
| 526 | PE | PV | 30 µM | 287 | 298 | IKSysFPKPGHK | y4: Phospho (+79.97), s5: Phospho (+79.97)                       | 99.70% | 1.89 | 15.4 | 2.24 | 3 | 516.91 | 1,547.70 | 0.00161  |
| 527 | PE | PV | 30 µM | 287 | 298 | IKsYsFPKPGHK | s3: Phospho (+79.97), s5: Phospho (+79.97)                       | 99.70% | 1.93 | 10.5 | 0.89 | 3 | 516.91 | 1,547.70 | 0.00179  |
| 528 | PE | PV | 30 µM | 287 | 298 | IKsYsFPKPGHK | s3: Phospho (+79.97), s5: Phospho (+79.97)                       | 99.70% | 2.14 | 0    | 0    | 3 | 516.91 | 1,547.70 | 0.00161  |



|     |    |    |        |     |     |              |                                            |        |      |      |      |   |        |          |          |
|-----|----|----|--------|-----|-----|--------------|--------------------------------------------|--------|------|------|------|---|--------|----------|----------|
| 529 | PE | PV | 30 µM  | 287 | 298 | IKSysFPKPGHK | y4: Phospho (+79.97), s5: Phospho (+79.97) | 99.70% | 2.4  | 26.8 | 2.31 | 3 | 516.91 | 1,547.70 | 0.00124  |
| 530 | PE | PV | 30 µM  | 287 | 298 | IKsYsFPKPGHK | s3: Phospho (+79.97), s5: Phospho (+79.97) | 99.70% | 1.95 | 15.2 | 1.55 | 3 | 516.91 | 1,547.70 | 0.00271  |
| 531 | PE | PV | 30 µM  | 287 | 298 | IKSysFPKPGHK | y4: Phospho (+79.97), s5: Phospho (+79.97) | 99.70% | 2.35 | 17   | 1.92 | 3 | 516.91 | 1,547.70 | 0.00454  |
| 532 | PE | PV | 30 µM  | 287 | 298 | IKsYsFPKPGHK | s3: Phospho (+79.97), s5: Phospho (+79.97) | 99.70% | 2.2  | 10.6 | 1.64 | 3 | 516.91 | 1,547.70 | 0.00344  |
| 533 | PE | PV | 30 µM  | 287 | 298 | IKsYsFPKPGHK | s3: Phospho (+79.97), s5: Phospho (+79.97) | 99.70% | 2.13 | 10   | 2.72 | 3 | 516.91 | 1,547.70 | 0.00271  |
| 534 | PE | PV | 30 µM  | 287 | 298 | IKsYsFPKPGHK | s3: Phospho (+79.97), s5: Phospho (+79.97) | 99.70% | 2.63 | 18.6 | 1.48 | 3 | 516.91 | 1,547.70 | 0.00289  |
| 535 | PE | PV | 30 µM  | 287 | 298 | IKSysFPKPGHK | y4: Phospho (+79.97), s5: Phospho (+79.97) | 99.70% | 2.31 | 19.4 | 1.43 | 3 | 516.91 | 1,547.70 | 0.00216  |
| 536 | PE | PV | 30 µM  | 287 | 298 | IKSySFPKPGHK | y4: Phospho (+79.97)                       | 99.70% | 2.48 | 39.8 | 2.82 | 3 | 490.25 | 1,467.73 | 0.00129  |
| 537 | PE | PV | 30 µM  | 287 | 298 | IKSySFPKPGHK | y4: Phospho (+79.97)                       | 99.70% | 2.4  | 32.2 | 3.32 | 3 | 490.25 | 1,467.73 | 0.00367  |
| 538 | PE | PV | 30 µM  | 287 | 298 | IKSysFPKPGHK | y4: Phospho (+79.97), s5: Phospho (+79.97) | 99.70% | 2.7  | 15.4 | 1.59 | 3 | 516.91 | 1,547.70 | 0.00271  |
| 539 | PE | PV | 30 µM  | 287 | 298 | IKSySFPKPGHK | y4: Phospho (+79.97)                       | 99.70% | 2.65 | 24.9 | 2.09 | 3 | 490.25 | 1,467.73 | 0.00377  |
| 540 | PE | PV | 100 µM | 287 | 298 | IKSysFPKPGHK | y4: Phospho (+79.97), s5: Phospho (+79.97) | 98.20% | 1.35 | 10.5 | 0.5  | 3 | 516.91 | 1,547.70 | 0.00179  |
| 541 | PE | PV | 100 µM | 287 | 298 | IKSysFPKPGHK | y4: Phospho (+79.97), s5: Phospho (+79.97) | 98.50% | 1.45 | 12.7 | 0.8  | 3 | 516.91 | 1,547.70 | 0.00124  |
| 542 | PE | PV | 100 µM | 287 | 298 | IKsYsFPKPGHK | s3: Phospho (+79.97), s5: Phospho (+79.97) | 93.30% | 2.53 | 0    | 0    | 3 | 516.91 | 1,547.70 | 0.00252  |
| 543 | PE | PV | 100 µM | 287 | 298 | IKSySFPKPGHK | y4: Phospho (+79.97)                       | 99.20% | 1.93 | 15.5 | 0    | 3 | 490.25 | 1,467.73 | 0.00468  |
| 544 | PE | PV | 100 µM | 287 | 298 | IKsYsFPKPGHK | s3: Phospho (+79.97), s5: Phospho (+79.97) | 99.70% | 2.92 | 0    | 0    | 3 | 516.91 | 1,547.70 | 0.00417  |
| 545 | PE | PV | 100 µM | 287 | 298 | IKsYsFPKPGHK | s3: Phospho (+79.97), s5: Phospho (+79.97) | 99.70% | 2.66 | 15.8 | 0    | 3 | 516.91 | 1,547.70 | 0.00271  |
| 546 | PE | PV | 100 µM | 287 | 298 | IKSysFPKPGHK | y4: Phospho (+79.97), s5: Phospho (+79.97) | 99.70% | 2.86 | 13.6 | 0    | 3 | 516.91 | 1,547.70 | 0.00362  |
| 547 | PE | PV | 100 µM | 287 | 298 | IKSysFPKPGHK | y4: Phospho (+79.97), s5: Phospho (+79.97) | 99.70% | 3.07 | 14.4 | 0    | 3 | 516.91 | 1,547.70 | 0.00490  |
| 548 | PE | PV | 100 µM | 287 | 298 | IKSysFPKPGHK | y4: Phospho (+79.97), s5: Phospho (+79.97) | 99.70% | 2.92 | 14.7 | 0    | 3 | 516.91 | 1,547.70 | 0.00563  |
| 549 | PE | PV | 100 µM | 287 | 298 | IKSysFPKPGHK | y4: Phospho (+79.97), s5: Phospho (+79.97) | 98.60% | 3.02 | 0    | 0    | 3 | 516.91 | 1,547.70 | 0.00307  |
| 550 | PE | PV | 100 µM | 287 | 298 | IKSysFPKPGHK | y4: Phospho (+79.97), s5: Phospho (+79.97) | 99.20% | 1.93 | 13.1 | 0    | 3 | 516.91 | 1,547.69 | -0.00059 |
| 551 | PE | PV | 100 µM | 287 | 298 | IKsYsFPKPGHK | s3: Phospho (+79.97)                       | 99.70% | 2.23 | 13.1 | 0    | 3 | 490.25 | 1,467.73 | 0.00148  |
| 552 | PE | PV | 100 µM | 287 | 298 | IKsYsFPKPGHK | s3: Phospho (+79.97), s5: Phospho (+79.97) | 99.70% | 2.83 | 11.6 | 0    | 3 | 516.91 | 1,547.69 | 0.00051  |
| 553 | PE | PV | 100 µM | 287 | 298 | IKSysFPKPGHK | y4: Phospho (+79.97), s5: Phospho (+79.97) | 99.70% | 3.39 | 10.9 | 0    | 3 | 516.91 | 1,547.69 | 0.00014  |

|     |    |    |        |     |     |              |                                                                  |        |      |      |      |   |        |          |          |
|-----|----|----|--------|-----|-----|--------------|------------------------------------------------------------------|--------|------|------|------|---|--------|----------|----------|
| 554 | PE | PV | 100 µM | 287 | 298 | IKSysFPKPGHK | y4: Phospho (+79.97), s5: Phospho (+79.97)                       | 97.90% | 1.2  | 12.5 | 1.03 | 2 | 774.86 | 1,547.70 | 0.01090  |
| 555 | PE | PV | 100 µM | 287 | 298 | IKSysFPKPGHK | s3: Phospho (+79.97), y4: Phospho (+79.97), s5: Phospho (+79.97) | 98.40% | 0.93 | 12.4 | 0    | 2 | 814.84 | 1,627.66 | 0.00245  |
| 556 | PE | PV | 100 µM | 287 | 298 | IKsYsFPKPGHK | s3: Phospho (+79.97), s5: Phospho (+79.97)                       | 98.70% | 1.72 | 16.3 | 0    | 3 | 516.91 | 1,547.70 | 0.00600  |
| 557 | PE | PV | 100 µM | 287 | 298 | IKsYSFPKPGHK | s3: Phospho (+79.97)                                             | 99.70% | 2.06 | 0    | 0    | 3 | 490.25 | 1,467.73 | -0.00072 |
| 558 | PE | PV | 100 µM | 287 | 298 | IKSySFPKPGHK | y4: Phospho (+79.97)                                             | 99.70% | 1.82 | 24.8 | 2.37 | 3 | 490.25 | 1,467.73 | 0.00230  |
| 559 | PE | PV | 100 µM | 287 | 298 | IKSySFPKPGHK | y4: Phospho (+79.97)                                             | 99.70% | 2.91 | 30.8 | 3.16 | 3 | 490.25 | 1,467.73 | 0.00111  |
| 560 | PE | PV | 100 µM | 287 | 298 | IKSySFPKPGHK | y4: Phospho (+79.97)                                             | 99.70% | 2.54 | 53.2 | 5.57 | 2 | 734.87 | 1,467.73 | 0.00152  |
| 561 | PE | PV | 100 µM | 287 | 298 | IKsysFPKPGHK | s3: Phospho (+79.97), y4: Phospho (+79.97), s5: Phospho (+79.97) | 99.70% | 2.29 | 14.9 | 2.41 | 3 | 543.56 | 1,627.67 | 0.00494  |
| 562 | PE | PV | 100 µM | 287 | 298 | IKSysFPKPGHK | y4: Phospho (+79.97), s5: Phospho (+79.97)                       | 99.70% | 2.53 | 49   | 1.54 | 2 | 774.86 | 1,547.70 | 0.00272  |
| 563 | PE | PV | 100 µM | 287 | 298 | IKSySFPKPGHK | y4: Phospho (+79.97)                                             | 99.70% | 2.62 | 49.2 | 4.32 | 2 | 734.87 | 1,467.73 | -0.00031 |
| 564 | PE | PV | 100 µM | 287 | 298 | IKsYsFPKPGHK | s3: Phospho (+79.97), s5: Phospho (+79.97)                       | 99.70% | 2.5  | 24   | 2.49 | 3 | 516.91 | 1,547.70 | 0.00637  |
| 565 | PE | PV | 100 µM | 287 | 298 | IKsYsFPKPGHK | s3: Phospho (+79.97), s5: Phospho (+79.97)                       | 99.70% | 2.68 | 22.5 | 2.28 | 3 | 516.91 | 1,547.70 | 0.00728  |
| 566 | PE | PV | 100 µM | 287 | 298 | IKSysFPKPGHK | y4: Phospho (+79.97), s5: Phospho (+79.97)                       | 99.70% | 3.2  | 23.9 | 2.44 | 3 | 516.91 | 1,547.70 | 0.00655  |
| 567 | PE | PV | 100 µM | 287 | 298 | IKSysFPKPGHK | y4: Phospho (+79.97), s5: Phospho (+79.97)                       | 98.80% | 1.99 | 12.8 | 0    | 2 | 774.87 | 1,547.72 | 0.02555  |
| 568 | PE | PV | 100 µM | 287 | 298 | IKsysFPKPGHK | s3: Phospho (+79.97), y4: Phospho (+79.97), s5: Phospho (+79.97) | 99.10% | 2.44 | 14.6 | 0    | 3 | 543.57 | 1,627.69 | 0.02581  |
| 569 | PE | PV | 100 µM | 287 | 298 | IKSysFPKPGHK | y4: Phospho (+79.97), s5: Phospho (+79.97)                       | 99.20% | 2.76 | 14.7 | 0    | 3 | 516.91 | 1,547.72 | 0.02541  |
| 570 | PE | PV | 100 µM | 287 | 298 | IKSysFPKPGHK | y4: Phospho (+79.97), s5: Phospho (+79.97)                       | 99.60% | 2.17 | 25.8 | 0    | 2 | 774.87 | 1,547.72 | 0.02225  |
| 571 | PE | PV | 100 µM | 287 | 298 | IKsysFPKPGHK | s3: Phospho (+79.97), y4: Phospho (+79.97), s5: Phospho (+79.97) | 99.70% | 2.38 | 17.2 | 0    | 3 | 543.57 | 1,627.69 | 0.02728  |
| 572 | PE | PV | 100 µM | 287 | 298 | IKsYsFPKPGHK | s3: Phospho (+79.97), s5: Phospho (+79.97)                       | 99.70% | 3.42 | 14.6 | 0    | 3 | 516.91 | 1,547.72 | 0.02669  |
| 573 | PE | PV | 100 µM | 287 | 298 | IKSysFPKPGHK | y4: Phospho (+79.97), s5: Phospho (+79.97)                       | 85.00% | 1.97 | 0    | 0    | 3 | 516.91 | 1,547.70 | 0.00399  |
| 574 | PE | PV | 100 µM | 287 | 298 | IKsySFPKPGHK | s3: Phospho (+79.97), y4: Phospho (+79.97)                       | 89.10% | 0    | 0    | 1.39 | 3 | 517.24 | 1,548.70 | 1.00600  |
| 575 | PE | PV | 100 µM | 287 | 298 | IKsYsFPKPGHK | s3: Phospho (+79.97), s5: Phospho (+79.97)                       | 93.00% | 1.88 | 0    | 0    | 3 | 516.91 | 1,547.70 | 0.00271  |
| 576 | PE | PV | 100 µM | 287 | 298 | IKsYSFPKPGHK | s3: Phospho (+79.97)                                             | 93.60% | 1.17 | 0    | 0.51 | 3 | 490.25 | 1,467.73 | 0.00038  |

|     |    |    |        |     |     |              |                                                                  |        |      |      |      |   |        |          |          |
|-----|----|----|--------|-----|-----|--------------|------------------------------------------------------------------|--------|------|------|------|---|--------|----------|----------|
| 577 | PE | PV | 100 µM | 287 | 298 | IKsYsFPKPGHK | s3: Phospho (+79.97), s5: Phospho (+79.97)                       | 95.10% | 1.96 | 0    | 0    | 3 | 516.91 | 1,547.70 | 0.00289  |
| 578 | PE | PV | 100 µM | 287 | 298 | IKsySFPKPGHK | s3: Phospho (+79.97), y4: Phospho (+79.97)                       | 97.20% | 0    | 0    | 1.96 | 3 | 517.24 | 1,548.70 | 1.00500  |
| 579 | PE | PV | 100 µM | 287 | 298 | IKSySFPKPGHK | y4: Phospho (+79.97)                                             | 99.70% | 2    | 0    | 0.68 | 4 | 367.94 | 1,467.73 | 0.00125  |
| 580 | PE | PV | 100 µM | 287 | 298 | IKsysFPKPGHK | s3: Phospho (+79.97), y4: Phospho (+79.97), s5: Phospho (+79.97) | 99.70% | 1.51 | 14.5 | 1.21 | 2 | 814.84 | 1,627.66 | 0.00050  |
| 581 | PE | PV | 100 µM | 287 | 298 | IKsysFPKPGHK | s3: Phospho (+79.97), y4: Phospho (+79.97), s5: Phospho (+79.97) | 99.70% | 1.55 | 11.5 | 0.77 | 3 | 543.56 | 1,627.66 | 0.00091  |
| 582 | PE | PV | 100 µM | 287 | 298 | IKsysFPKPGHK | s3: Phospho (+79.97), y4: Phospho (+79.97), s5: Phospho (+79.97) | 99.70% | 1.01 | 21   | 0    | 2 | 814.84 | 1,627.66 | -0.00231 |
| 583 | PE | PV | 100 µM | 287 | 298 | IKSySFPKPGHK | y4: Phospho (+79.97)                                             | 99.70% | 1.8  | 0    | 0.82 | 4 | 367.94 | 1,467.73 | 0.00259  |
| 584 | PE | PV | 100 µM | 287 | 298 | IKsysFPKPGHK | s3: Phospho (+79.97), y4: Phospho (+79.97), s5: Phospho (+79.97) | 99.70% | 1.97 | 10   | 1.35 | 3 | 543.56 | 1,627.66 | 0.00018  |
| 585 | PE | PV | 100 µM | 287 | 298 | IKsysFPKPGHK | s3: Phospho (+79.97), y4: Phospho (+79.97), s5: Phospho (+79.97) | 99.70% | 1.66 | 20.2 | 1.07 | 3 | 543.56 | 1,627.66 | -0.00147 |
| 586 | PE | PV | 100 µM | 287 | 298 | IKSySFPKPGHK | y4: Phospho (+79.97), s5: Phospho (+79.97)                       | 99.70% | 2.01 | 60.5 | 1.72 | 2 | 774.85 | 1,547.69 | -0.00094 |
| 587 | PE | PV | 100 µM | 287 | 298 | IKsYsFPKPGHK | s3: Phospho (+79.97), s5: Phospho (+79.97)                       | 99.70% | 2.27 | 0    | 0.42 | 3 | 516.91 | 1,547.70 | 0.00216  |
| 588 | PE | PV | 100 µM | 287 | 298 | IKsYSFPKPGHK | s3: Phospho (+79.97)                                             | 99.70% | 2.06 | 26.2 | 0.89 | 3 | 490.25 | 1,467.73 | 0.00285  |
| 589 | PE | PV | 100 µM | 287 | 298 | IKSYsFPKPGHK | s5: Phospho (+79.97)                                             | 99.70% | 1.78 | 40.5 | 4.21 | 2 | 734.87 | 1,467.73 | 0.00176  |
| 590 | PE | PV | 100 µM | 287 | 298 | IKsYSFPKPGHK | s3: Phospho (+79.97)                                             | 99.70% | 2.23 | 24.1 | 1.74 | 3 | 490.25 | 1,467.73 | 0.00001  |
| 591 | PE | PV | 100 µM | 287 | 298 | IKsysFPKPGHK | s3: Phospho (+79.97), y4: Phospho (+79.97), s5: Phospho (+79.97) | 99.70% | 2.18 | 18.7 | 1.72 | 3 | 543.56 | 1,627.67 | 0.00512  |
| 592 | PE | PV | 100 µM | 287 | 298 | IKsysFPKPGHK | s3: Phospho (+79.97), y4: Phospho (+79.97), s5: Phospho (+79.97) | 99.70% | 2.56 | 20.3 | 0    | 3 | 543.56 | 1,627.66 | 0.00146  |
| 593 | PE | PV | 100 µM | 287 | 298 | IKSySFPKPGHK | y4: Phospho (+79.97), s5: Phospho (+79.97)                       | 99.70% | 2.57 | 18.8 | 0.68 | 3 | 516.91 | 1,547.70 | 0.00472  |
| 594 | PE | PV | 100 µM | 287 | 298 | IKSysFPKPGHK | y4: Phospho (+79.97), s5: Phospho (+79.97)                       | 99.70% | 2.97 | 18.8 | 1.89 | 3 | 516.91 | 1,547.70 | 0.00289  |
| 595 | PE | PV | 100 µM | 287 | 298 | IKSySFPKPGHK | y4: Phospho (+79.97)                                             | 99.70% | 2.49 | 33   | 2.92 | 3 | 490.25 | 1,467.73 | 0.00120  |
| 596 | PE | PV | 100 µM | 287 | 298 | IKsYsFPKPGHK | s3: Phospho (+79.97), s5: Phospho (+79.97)                       | 99.70% | 2.56 | 21.1 | 1.05 | 3 | 516.91 | 1,547.70 | 0.00344  |
| 597 | PE | PV | 100 µM | 287 | 298 | IKsYsFPKPGHK | s3: Phospho (+79.97), s5: Phospho (+79.97)                       | 99.70% | 2.87 | 0    | 2.15 | 3 | 516.91 | 1,547.70 | 0.00271  |
| 598 | PE | Ig | 2 min  | 289 | 298 | SYsFPKPGHK   | s3: Phospho (+79.97)                                             | 83.40% | 1.43 | 0    | 0    | 3 | 409.86 | 1,226.55 | 0.00412  |
| 599 | PE | Hg | 1 µM   | 289 | 298 | SYsFPKPGHK   | s3: Phospho (+79.97)                                             | 88.10% | 1.13 | 0    | 0.52 | 3 | 409.86 | 1,226.55 | 0.00495  |

|     |    |    |        |     |     |                                             |                                                |        |      |      |      |   |         |          |          |
|-----|----|----|--------|-----|-----|---------------------------------------------|------------------------------------------------|--------|------|------|------|---|---------|----------|----------|
| 600 | PE | Hg | 5 µM   | 289 | 298 | SySFPKPGHK                                  | s3: Phospho (+79.97)                           | 99.70% | 1.52 | 0    | 0.62 | 3 | 409.86  | 1,226.55 | 0.00330  |
| 601 | PE | PV | 3 µM   | 289 | 298 | SySFPKPGHK                                  | s3: Phospho (+79.97)                           | 97.50% | 2.04 | 12.1 | 0    | 3 | 409.86  | 1,226.57 | 0.01822  |
| 602 | PE | PV | 3 µM   | 289 | 298 | SySFPKPGHK                                  | s3: Phospho (+79.97)                           | 99.30% | 2.2  | 12.8 | 0    | 3 | 409.86  | 1,226.57 | 0.01841  |
| 603 | PE | PV | 10 µM  | 289 | 298 | sYSFPKPGHK                                  | s1: Phospho (+79.97)                           | 98.50% | 1.09 | 11   | 0    | 3 | 409.86  | 1,226.55 | 0.00339  |
| 604 | PE | PV | 10 µM  | 289 | 298 | sYSFPKPGHK                                  | s1: Phospho (+79.97)                           | 99.70% | 2.41 | 14.7 | 1.23 | 3 | 409.86  | 1,226.55 | 0.00339  |
| 605 | PE | PV | 10 µM  | 289 | 298 | sYSFPKPGHK                                  | s1: Phospho (+79.97)                           | 99.70% | 2.03 | 40.7 | 9.62 | 2 | 614.28  | 1,226.55 | 0.00167  |
| 606 | PE | PV | 10 µM  | 289 | 298 | sYSFPKPGHK                                  | s1: Phospho (+79.97), s3: Phospho (+79.97)     | 99.20% | 0.74 | 11.1 | 1.46 | 2 | 654.26  | 1,306.51 | -0.00031 |
| 607 | PE | PV | 10 µM  | 289 | 298 | SySFPKPGHK                                  | y2: Phospho (+79.97)                           | 99.70% | 1.23 | 13.6 | 1.77 | 3 | 409.86  | 1,226.55 | -0.00055 |
| 608 | PE | PV | 10 µM  | 289 | 298 | SySFPKPGHK                                  | y2: Phospho (+79.97)                           | 99.70% | 1.88 | 15.8 | 2.43 | 3 | 409.86  | 1,226.55 | 0.00156  |
| 609 | PE | PV | 30 µM  | 289 | 298 | SySFPKPGHK                                  | y2: Phospho (+79.97)                           | 99.70% | 1.48 | 11.4 | 1.15 | 3 | 409.86  | 1,226.55 | 0.00477  |
| 610 | PE | PV | 30 µM  | 289 | 298 | sYSFPKPGHK                                  | s1: Phospho (+79.97)                           | 99.70% | 1.11 | 11.1 | 1.02 | 3 | 409.86  | 1,226.55 | 0.00422  |
| 611 | PE | PV | 30 µM  | 289 | 298 | SySFPKPGHK                                  | y2: Phospho (+79.97)                           | 99.70% | 2.16 | 17.7 | 1.49 | 3 | 409.86  | 1,226.55 | 0.00330  |
| 612 | PE | PV | 30 µM  | 289 | 298 | SySFPKPGHK                                  | y2: Phospho (+79.97)                           | 99.70% | 1.71 | 36.5 | 4.89 | 2 | 614.28  | 1,226.55 | 0.00167  |
| 613 | PE | PV | 30 µM  | 289 | 298 | sYSFPKPGHK                                  | s1: Phospho (+79.97)                           | 99.70% | 1.53 | 39.1 | 3.8  | 2 | 614.28  | 1,226.55 | 0.00106  |
| 614 | PE | PV | 30 µM  | 289 | 298 | sYSFPKPGHK                                  | s1: Phospho (+79.97), s3: Phospho (+79.97)     | 99.60% | 0.7  | 0    | 1.23 | 2 | 654.26  | 1,306.51 | -0.00031 |
| 615 | PE | PV | 30 µM  | 289 | 298 | sYSFPKPGHK                                  | s1: Phospho (+79.97)                           | 99.70% | 1.17 | 14.2 | 1.57 | 2 | 614.28  | 1,226.55 | -0.00053 |
| 616 | PE | PV | 30 µM  | 289 | 298 | SySFPKPGHK                                  | y2: Phospho (+79.97)                           | 99.70% | 1.14 | 11.1 | 1.68 | 2 | 614.28  | 1,226.55 | -0.00224 |
| 617 | PE | PV | 30 µM  | 289 | 298 | SySFPKPGHK                                  | y2: Phospho (+79.97)                           | 99.70% | 1.8  | 21.5 | 2.6  | 3 | 409.86  | 1,226.55 | 0.00229  |
| 618 | PE | PV | 30 µM  | 289 | 298 | SySFPKPGHK                                  | y2: Phospho (+79.97), s3: Phospho (+79.97)     | 99.70% | 1.63 | 24.7 | 4.51 | 2 | 654.26  | 1,306.51 | -0.00129 |
| 619 | PE | PV | 30 µM  | 289 | 298 | SySFPKPGHK                                  | y2: Phospho (+79.97)                           | 99.70% | 2.43 | 15.2 | 2.39 | 3 | 409.86  | 1,226.55 | 0.00119  |
| 620 | PE | PV | 30 µM  | 289 | 298 | SySFPKPGHK                                  | y2: Phospho (+79.97)                           | 99.70% | 2.32 | 12.8 | 2.4  | 3 | 409.86  | 1,226.55 | 0.00000  |
| 621 | PE | PV | 30 µM  | 289 | 298 | SySFPKPGHK                                  | y2: Phospho (+79.97)                           | 99.70% | 2.05 | 15.1 | 2.51 | 3 | 409.86  | 1,226.55 | 0.00129  |
| 622 | PE | PV | 100 µM | 289 | 298 | SySFPKPGHK                                  | y2: Phospho (+79.97)                           | 99.70% | 1.78 | 11.6 | 0.89 | 3 | 409.86  | 1,226.55 | 0.00577  |
| 623 | PE | PV | 100 µM | 289 | 298 | sYSFPKPGHK                                  | s1: Phospho (+79.97)                           | 99.70% | 1.47 | 17.2 | 2.24 | 2 | 614.28  | 1,226.55 | -0.00139 |
| 624 | PE | PV | 100 µM | 289 | 298 | SySFPKPGHK                                  | y2: Phospho (+79.97)                           | 99.70% | 2.57 | 34.9 | 8.41 | 2 | 614.28  | 1,226.55 | 0.00215  |
| 625 | PE | PV | 100 µM | 289 | 298 | SySFPKPGHK                                  | y2: Phospho (+79.97), s3: Phospho (+79.97)     | 99.60% | 1.56 | 13.9 | 0.85 | 3 | 436.51  | 1,306.52 | 0.00050  |
| 626 | PE | PV | 100 µM | 289 | 298 | SySFPKPGHK                                  | y2: Phospho (+79.97)                           | 99.70% | 1.67 | 0    | 1.27 | 3 | 409.86  | 1,226.55 | 0.00174  |
| 627 | PE | PV | 100 µM | 289 | 298 | SySFPKPGHK                                  | y2: Phospho (+79.97)                           | 99.70% | 2.18 | 19.2 | 3.06 | 3 | 409.86  | 1,226.55 | -0.00045 |
| 628 | PE | PV | 100 µM | 289 | 298 | SySFPKPGHK                                  | y2: Phospho (+79.97)                           | 99.70% | 2.1  | 13.9 | 3.09 | 3 | 409.86  | 1,226.55 | 0.00202  |
| 629 | IP | NT | 0      | 299 | 328 | KPAPPQGSrPESTVSFNp <sub>y</sub> EPTGGPWGPDR | y19: Phospho (+79.97)                          | 98.20% | 2.7  | 24.8 | 3.66 | 4 | 822.89  | 3,287.52 | 0.01562  |
| 630 | IP | NT | 0      | 299 | 328 | KPAPPQGSrPESTVSFNp <sub>y</sub> EPTGGPWGPDR | y19: Phospho (+79.97)                          | 99.10% | 2.12 | 37.7 | 8.41 | 3 | 1096.84 | 3,287.51 | 0.00569  |
| 631 | IP | NT | 0      | 299 | 328 | KPAPPQGSrPESTVSFNp <sub>y</sub> EPTGGPWGPDR | y19: Phospho (+79.97)                          | 99.70% | 5.11 | 35.9 | 11.4 | 4 | 822.88  | 3,287.50 | -0.00782 |
| 632 | IP | NT | 0      | 299 | 328 | KPAPPQGSrPESTVSFNp <sub>y</sub> EPTGGPWGPDR | y19: Phospho (+79.97)                          | 99.10% | 5.29 | 48.7 | 2.96 | 3 | 1096.84 | 3,287.50 | 0.00019  |
| 633 | IP | NT | 0      | 299 | 328 | KPAPPQGSrPESTVSFNp <sub>y</sub> EPTGGPWGPDR | y19: Phospho (+79.97)                          | 99.40% | 5.27 | 52   | 2.96 | 3 | 1096.84 | 3,287.51 | 0.00276  |
| 634 | IP | NT | 0      | 299 | 328 | KPAPPQGSrPESTVSFNp <sub>y</sub> EPTGGPWGPDR | y19: Phospho (+79.97)                          | 99.70% | 6.24 | 50.6 | 3.19 | 3 | 1096.84 | 3,287.50 | 0.00056  |
| 635 | IP | Hg | 50 µM  | 299 | 328 | KPAPPQGSrPESTVSFNp <sub>y</sub> EPTGGPWGPDR | n17: Deamidated (+0.98), y19: Phospho (+79.97) | 99.10% | 3.64 | 17.8 | 10.6 | 3 | 1097.18 | 3,288.51 | 0.02399  |
| 636 | IP | Hg | 50 µM  | 299 | 328 | KPAPPQGSrPESTVSFNp <sub>y</sub> EPTGGPWGPDR | y19: Phospho (+79.97)                          | 99.60% | 3.07 | 42.6 | 10   | 4 | 822.89  | 3,287.51 | 0.00732  |
| 637 | IP | Hg | 50 µM  | 299 | 328 | KPAPPQGSrPESTVSFNp <sub>y</sub> EPTGGPWGPDR | y19: Phospho (+79.97)                          | 99.10% | 4.97 | 35.2 | 2.57 | 3 | 1096.84 | 3,287.50 | -0.00677 |
| 638 | IP | Hg | 50 µM  | 299 | 328 | KPAPPQGSrPESTVSFNp <sub>y</sub> EPTGGPWGPDR | y19: Phospho (+79.97)                          | 99.50% | 5.29 | 30.5 | 3.74 | 3 | 1096.84 | 3,287.50 | -0.00054 |
| 639 | IP | Hg | 50 µM  | 299 | 328 | KPAPPQGSrPESTVSFNp <sub>y</sub> EPTGGPWGPDR | y19: Phospho (+79.97)                          | 99.70% | 5.33 | 35.6 | 5.66 | 3 | 1096.84 | 3,287.50 | -0.00017 |

|     |    |    |       |     |     |                                |                                                |        |      |      |      |   |         |          |          |
|-----|----|----|-------|-----|-----|--------------------------------|------------------------------------------------|--------|------|------|------|---|---------|----------|----------|
| 640 | IP | PV | 0     | 299 | 328 | KPAPPQGSRPSTVSFNPyEPTGGPWGPDR  | t22: Phospho (+79.97)                          | 99.70% | 5.13 | 25.4 | 13.6 | 3 | 1096.84 | 3,287.51 | 0.00239  |
| 641 | IP | PV | 0     | 299 | 328 | KPAPPQGSRPSTVSFNPyEPTGGPWGPDR  | y19: Phospho (+79.97)                          | 99.70% | 4.19 | 36.6 | 13.3 | 4 | 822.89  | 3,287.51 | 0.00732  |
| 642 | IP | PV | 0     | 299 | 328 | KPAPPQGSRPSTVSFNPyEPTGGPWGPDR  | y19: Phospho (+79.97)                          | 98.60% | 3.69 | 24.4 | 1.32 | 4 | 822.88  | 3,287.50 | -0.00196 |
| 643 | IP | PV | 0     | 299 | 328 | KPAPPQGSRPSTVSFNPyEPTGGPWGPDR  | y19: Phospho (+79.97)                          | 98.90% | 3.66 | 25.9 | 1.6  | 4 | 822.88  | 3,287.51 | 0.00268  |
| 644 | IP | PV | 0     | 299 | 328 | KPAPPQGSRPSTVSFNPyEPTGGPWGPDR  | y19: Phospho (+79.97)                          | 99.60% | 5.86 | 37.4 | 1.66 | 3 | 1096.84 | 3,287.51 | 0.00349  |
| 645 | IP | PV | 0     | 299 | 328 | KPAPPQGSRPSTVSFNPyEPTGGPWGPDR  | y19: Phospho (+79.97)                          | 99.70% | 3.59 | 28.6 | 2.11 | 4 | 822.88  | 3,287.51 | 0.00268  |
| 646 | IP | PV | 0     | 299 | 328 | KPAPPQGSRPSTVSFNPyEPTGGPWGPDR  | y19: Phospho (+79.97)                          | 99.70% | 5.63 | 32.5 | 2.82 | 3 | 1096.84 | 3,287.51 | 0.00495  |
| 647 | IP | PV | 0     | 299 | 328 | KPAPPQGSRPSTVSFNPyEPTGGPWGPDR  | y19: Phospho (+79.97)                          | 99.70% | 4.19 | 30.1 | 1.92 | 4 | 822.88  | 3,287.51 | 0.00341  |
| 648 | IP | PV | 0     | 299 | 328 | KPAPPQGSRPSTVSFNPyEPTGGPWGPDR  | y19: Phospho (+79.97)                          | 99.70% | 5.92 | 40.7 | 2.44 | 3 | 1096.84 | 3,287.51 | 0.00459  |
| 649 | IP | PV | 0     | 299 | 328 | KPAPPQGSRPSTVSFNPyEPTGGPWGPDR  | y19: Phospho (+79.97)                          | 99.70% | 5.8  | 48.8 | 4.64 | 3 | 1096.84 | 3,287.51 | 0.00569  |
| 650 | IP | PV | 0     | 299 | 328 | KPAPPQGSRPSTVSFNPyEPTGGPWGPDR  | y19: Phospho (+79.97)                          | 99.70% | 3.95 | 33.5 | 2.8  | 4 | 822.88  | 3,287.51 | 0.00586  |
| 651 | IP | PV | 0     | 299 | 328 | KPAPPQGSRPSTVSFNPyEPTGGPWGPDR  | n17: Deamidated (+0.98), y19: Phospho (+79.97) | 99.70% | 5.97 | 60.1 | 4.8  | 3 | 1097.18 | 3,288.51 | 0.02655  |
| 652 | PE | Ig | NT    | 299 | 328 | KPAPPQGSRPSTVSFNPyEPTGGPWGPDR  | y19: Phospho (+79.97)                          | 99.70% | 3.89 | 0    | 5.55 | 4 | 822.89  | 3,287.51 | 0.00683  |
| 653 | PE | Ig | NT    | 299 | 328 | KPAPPQGSRPSTVSFNPyEPTGGPWGPDR  | y19: Phospho (+79.97)                          | 99.70% | 4.72 | 20.7 | 8.89 | 4 | 822.89  | 3,287.53 | 0.02563  |
| 654 | PE | Ig | 1 min | 299 | 328 | KPAPPQGSRPSTVSFNPyEPTGGPWGPDR  | y19: Phospho (+79.97)                          | 99.70% | 5.12 | 11.1 | 5.08 | 4 | 822.89  | 3,287.51 | 0.00732  |
| 655 | PE | Ig | 1 min | 299 | 328 | KPAPPQGSRPSTVSFNPyEPTGGPWGPDR  | y19: Phospho (+79.97)                          | 99.70% | 4.87 | 22.3 | 8.59 | 4 | 822.89  | 3,287.53 | 0.02221  |
| 656 | PE | Ig | 1 min | 299 | 328 | KPAPPQGSRPSTVSFNPyEPTGGPWGPDR  | y19: Phospho (+79.97)                          | 99.70% | 4.5  | 26.2 | 8.34 | 4 | 822.89  | 3,287.52 | 0.01611  |
| 657 | PE | Ig | 1 min | 299 | 328 | KPAPPQGSRPSTVSFNPyEPTGGPWGPDR  | y19: Phospho (+79.97)                          | 99.70% | 5.22 | 21.7 | 11   | 4 | 822.89  | 3,287.53 | 0.02465  |
| 658 | PE | Ig | 1 min | 299 | 328 | KPAPPQGSRPSTVSFNPyEPTGGPWGPDR  | y19: Phospho (+79.97)                          | 99.70% | 4.99 | 18.1 | 11.1 | 4 | 822.89  | 3,287.52 | 0.01831  |
| 659 | PE | Ig | 1 min | 299 | 328 | KPAPPQGSRPSTVSFNPyEPTGGPWGPDR  | y19: Phospho (+79.97)                          | 99.70% | 5.58 | 26.1 | 8.6  | 4 | 822.89  | 3,287.53 | 0.02490  |
| 660 | PE | Ig | 1 min | 299 | 328 | KPAPPQGSRPSTVSFNPyEPTGGPWGPDR  | y19: Phospho (+79.97)                          | 99.70% | 4.78 | 24   | 10.7 | 4 | 822.88  | 3,287.51 | 0.00122  |
| 661 | PE | Ig | 1 min | 299 | 328 | KPAPPQGSRPSTVSFNPyEPTGGPWGPDR  | y19: Phospho (+79.97)                          | 99.70% | 3.45 | 23.9 | 6.42 | 4 | 822.90  | 3,287.55 | 0.04834  |
| 662 | PE | Ig | 1 min | 299 | 328 | KPAPPQGSRPSTVSFNPyEPTGGPWGPDR  | y19: Phospho (+79.97)                          | 99.70% | 2.52 | 17.4 | 6.49 | 3 | 1096.86 | 3,287.55 | 0.04727  |
| 663 | PE | Ig | 1 min | 299 | 328 | KPAPPQGSRPSTVSFNPyEPTGGPWGPDR  | y19: Phospho (+79.97)                          | 99.70% | 2.78 | 23.2 | 7.12 | 3 | 1096.86 | 3,287.55 | 0.04487  |
| 664 | PE | Ig | 1 min | 299 | 328 | KPAPPQGSRPSTVSFNPyEPTGGPWGPDR  | y19: Phospho (+79.97)                          | 99.70% | 3.59 | 33.1 | 9.6  | 4 | 822.89  | 3,287.53 | 0.02587  |
| 665 | PE | Ig | 1 min | 299 | 328 | KPAPPQGSRPSTVSFNPyEPTGGPWGPDR  | n17: Deamidated (+0.98), y19: Phospho (+79.97) | 99.70% | 3.65 | 20   | 11.9 | 4 | 823.15  | 3,288.55 | 0.06359  |
| 666 | PE | Ig | 1 min | 299 | 328 | KPAPPQGSRPSTVSFNPyEPTGGPWGPDR  | y19: Phospho (+79.97)                          | 99.70% | 3.63 | 19.6 | 11.5 | 3 | 1096.86 | 3,287.55 | 0.04633  |
| 667 | PE | Ig | 1 min | 299 | 328 | KPAPPQGSRPSTVSFNPyEPTGGPWGPDR  | y19: Phospho (+79.97)                          | 99.70% | 3.73 | 37.9 | 10.4 | 4 | 822.89  | 3,287.54 | 0.03881  |
| 668 | PE | Ig | 1 min | 299 | 328 | KPAPPQGSRPSTVSFNPyEPTGGPWGPDR  | y19: Phospho (+79.97)                          | 99.70% | 3.67 | 25.8 | 11.9 | 4 | 822.89  | 3,287.54 | 0.03320  |
| 669 | PE | Ig | 2 min | 299 | 328 | KPAPPQGSRPSTVSFNPyEPTGGPWGPDR  | y19: Phospho (+79.97)                          | 99.70% | 3.33 | 26.3 | 10.5 | 4 | 822.89  | 3,287.52 | 0.01489  |
| 670 | PE | Ig | 2 min | 299 | 328 | KPAPPQGSRPSTVSFNPyEPTGGPWGPDR  | y19: Phospho (+79.97)                          | 99.60% | 2.59 | 11.5 | 3.74 | 3 | 1096.85 | 3,287.52 | 0.01814  |
| 671 | PE | Ig | 2 min | 299 | 328 | KPAPPqGSRPESTVSFNPyEPTGGPWGPDR | q6: Deamidated (+0.98), y19: Phospho (+79.97)  | 99.70% | 2.96 | 15.1 | 8.24 | 4 | 823.14  | 3,288.51 | 0.02648  |
| 672 | PE | Ig | 2 min | 299 | 328 | KPAPPQGSRPSTVSFNPyEPTGGPWGPDR  | y19: Phospho (+79.97)                          | 99.70% | 4.86 | 11.7 | 6.55 | 4 | 822.89  | 3,287.51 | 0.00854  |
| 673 | PE | Ig | 2 min | 299 | 328 | KPAPPQGSRPSTVSFNPyEPTGGPWGPDR  | y19: Phospho (+79.97)                          | 99.70% | 5.03 | 26.3 | 9.37 | 4 | 822.89  | 3,287.53 | 0.02734  |
| 674 | PE | Ig | 2 min | 299 | 328 | KPAPPQGSRPSTVSFNPyEPTGGPWGPDR  | y19: Phospho (+79.97)                          | 99.70% | 0    | 0    | 12.6 | 4 | 823.39  | 3,289.52 | 2.01900  |
| 675 | PE | Ig | 2 min | 299 | 328 | KPAPPqGSRPESTVSFNPyEPTGGPWGPDR | q6: Deamidated (+0.98), y19: Phospho (+79.97)  | 99.70% | 3.38 | 13.5 | 8.32 | 4 | 823.13  | 3,288.50 | 0.01403  |
| 676 | PE | Ig | 2 min | 299 | 328 | KPAPPQGSRPSTVSFNPyEPTGGPWGPDR  | y19: Phospho (+79.97)                          | 99.70% | 5.05 | 30   | 9.77 | 4 | 822.89  | 3,287.53 | 0.02710  |
| 677 | PE | Ig | 2 min | 299 | 328 | KPAPPQGSRPSTVSFNPyEPTGGPWGPDR  | y19: Phospho (+79.97)                          | 99.70% | 5.36 | 12.3 | 5.41 | 4 | 822.88  | 3,287.51 | 0.00537  |
| 678 | PE | Ig | 2 min | 299 | 328 | KPAPPQGSRPSTVSFNPyEPTGGPWGPDR  | y19: Phospho (+79.97)                          | 99.70% | 3.85 | 33.6 | 11.6 | 3 | 1096.85 | 3,287.52 | 0.01484  |
| 679 | PE | Ig | 2 min | 299 | 328 | KPAPPQGSRPSTVSFNPyEPTGGPWGPDR  | y19: Phospho (+79.97)                          | 99.70% | 5.16 | 23.3 | 12.6 | 4 | 822.89  | 3,287.52 | 0.01855  |
| 680 | PE | Ig | 2 min | 299 | 328 | KPAPPQGSRPSTVSFNPyEPTGGPWGPDR  | y19: Phospho (+79.97)                          | 99.70% | 5.95 | 29.1 | 12   | 4 | 822.88  | 3,287.51 | 0.00244  |

|     |    |    |       |     |     |                               |                                               |        |      |      |      |   |         |          |         |
|-----|----|----|-------|-----|-----|-------------------------------|-----------------------------------------------|--------|------|------|------|---|---------|----------|---------|
| 681 | PE | Ig | 2 min | 299 | 328 | KPAPPQGSRPSTVSFNPyEPTGGPWGPDR | y19: Phospho (+79.97)                         | 99.70% | 2.99 | 37.9 | 0    | 4 | 822.88  | 3,287.51 | 0.00586 |
| 682 | PE | Ig | 2 min | 299 | 328 | KPAPPQGSRPSTVSFNPyEPTGGPWGPDR | y19: Phospho (+79.97)                         | 99.70% | 2.44 | 23.9 | 6    | 3 | 1096.86 | 3,287.55 | 0.04597 |
| 683 | PE | Ig | 2 min | 299 | 328 | KPAPPQGSRPSTVSFNPyEPTGGPWGPDR | y19: Phospho (+79.97)                         | 99.70% | 2.35 | 19.6 | 7.28 | 3 | 1096.86 | 3,287.55 | 0.04926 |
| 684 | PE | Ig | 2 min | 299 | 328 | KPAPPQGSRPSTVSFNPyEPTGGPWGPDR | y19: Phospho (+79.97)                         | 99.70% | 2.63 | 15.3 | 8    | 3 | 1096.86 | 3,287.56 | 0.05146 |
| 685 | PE | Ig | 2 min | 299 | 328 | KPAPPQGSRPSTVSFNPyEPTGGPWGPDR | y19: Phospho (+79.97)                         | 99.70% | 3.07 | 23.5 | 8.82 | 4 | 822.90  | 3,287.56 | 0.05273 |
| 686 | PE | Ig | 2 min | 299 | 328 | KPAPPQGSRPSTVSFNPyEPTGGPWGPDR | y19: Phospho (+79.97)                         | 99.70% | 3.43 | 27.5 | 8.66 | 4 | 822.90  | 3,287.55 | 0.05029 |
| 687 | PE | Ig | 2 min | 299 | 328 | KPAPPQGSRPSTVSFNPyEPTGGPWGPDR | y19: Phospho (+79.97)                         | 99.70% | 3.04 | 17   | 8.85 | 4 | 822.89  | 3,287.54 | 0.04077 |
| 688 | PE | Ig | 2 min | 299 | 328 | KPAPPQGSRPSTVSFNPyEPTGGPWGPDR | y19: Phospho (+79.97)                         | 99.70% | 2.47 | 27.2 | 11.7 | 3 | 1096.86 | 3,287.56 | 0.05256 |
| 689 | PE | Ig | 2 min | 299 | 328 | KPAPPQGSRPSTVSFNPyEPTGGPWGPDR | y19: Phospho (+79.97)                         | 99.70% | 2.7  | 28.8 | 11.3 | 4 | 822.90  | 3,287.56 | 0.05493 |
| 690 | PE | Ig | 2 min | 299 | 328 | KPAPPQGSRPSTVSFNPyEPTGGPWGPDR | s8: Phospho (+79.97)                          | 99.70% | 2.75 | 22.4 | 11.5 | 3 | 1096.86 | 3,287.57 | 0.06135 |
| 691 | PE | Ig | 2 min | 299 | 328 | KPAPPQGSRPSTVSFNPyEPTGGPWGPDR | y19: Phospho (+79.97)                         | 99.70% | 3.21 | 25.5 | 10   | 4 | 822.89  | 3,287.55 | 0.04467 |
| 692 | PE | Ig | 2 min | 299 | 328 | KPAPPQGSRPSTVSFNPyEPTGGPWGPDR | y19: Phospho (+79.97)                         | 99.70% | 3.25 | 21.8 | 10.7 | 4 | 822.89  | 3,287.54 | 0.04052 |
| 693 | PE | Ig | 2 min | 299 | 328 | KPAPPQGSRPSTVSFNPyEPTGGPWGPDR | y19: Phospho (+79.97)                         | 99.70% | 3.19 | 16.5 | 10.1 | 4 | 822.89  | 3,287.55 | 0.04541 |
| 694 | PE | Ig | 3 min | 299 | 328 | KPAPPQGSRPSTVSFNPyEPTGGPWGPDR | y19: Phospho (+79.97)                         | 99.70% | 1.98 | 37.2 | 5.74 | 4 | 822.88  | 3,287.51 | 0.00586 |
| 695 | PE | Ig | 3 min | 299 | 328 | KPAPPQGSRPSTVSFNPyEPTGGPWGPDR | y19: Phospho (+79.97)                         | 93.80% | 1.66 | 0    | 1.77 | 3 | 1096.85 | 3,287.52 | 0.01740 |
| 696 | PE | Ig | 3 min | 299 | 328 | KPAPPQGSRPSTVSFNPyEPTGGPWGPDR | y19: Phospho (+79.97)                         | 99.70% | 3.53 | 12.7 | 4.51 | 4 | 822.89  | 3,287.53 | 0.02929 |
| 697 | PE | Ig | 3 min | 299 | 328 | KPAPPQGSRPSTVSFNPyEPTGGPWGPDR | y19: Phospho (+79.97)                         | 99.70% | 2.19 | 20.2 | 7.04 | 3 | 1096.85 | 3,287.52 | 0.01924 |
| 698 | PE | Ig | 3 min | 299 | 328 | KPAPPQGSRPSTVSFNPyEPTGGPWGPDR | y19: Phospho (+79.97)                         | 99.70% | 4.45 | 25.8 | 8.42 | 4 | 822.89  | 3,287.53 | 0.02685 |
| 699 | PE | Ig | 3 min | 299 | 328 | KPAPPQGSRPSTVSFNPyEPTGGPWGPDR | y19: Phospho (+79.97)                         | 99.70% | 4.67 | 19.7 | 8.24 | 4 | 822.89  | 3,287.53 | 0.02661 |
| 700 | PE | Ig | 3 min | 299 | 328 | KPAPPQGSRPSTVSFNPyEPTGGPWGPDR | y19: Phospho (+79.97)                         | 99.70% | 5.42 | 32.7 | 10   | 4 | 822.89  | 3,287.53 | 0.02685 |
| 701 | PE | Ig | 3 min | 299 | 328 | KPAPPQGSRPSTVSFNPyEPTGGPWGPDR | y19: Phospho (+79.97)                         | 99.70% | 5.42 | 28.7 | 11.2 | 4 | 822.89  | 3,287.53 | 0.02197 |
| 702 | PE | Ig | 3 min | 299 | 328 | KPAPPQGSRPSTVSFNPyEPTGGPWGPDR | y19: Phospho (+79.97)                         | 99.70% | 4.99 | 19.5 | 9.72 | 4 | 822.89  | 3,287.51 | 0.00903 |
| 703 | PE | Ig | 3 min | 299 | 328 | KPAPPqGSRPSTVSFNPyEPTGGPWGPDR | q6: Deamidated (+0.98), y19: Phospho (+79.97) | 99.70% | 4.13 | 13   | 6.7  | 4 | 823.13  | 3,288.50 | 0.01647 |
| 704 | PE | Ig | 3 min | 299 | 328 | KPAPPQGSRPSTVSFNPyEPTGGPWGPDR | y19: Phospho (+79.97)                         | 99.70% | 3.18 | 21.4 | 9.21 | 3 | 1096.85 | 3,287.52 | 0.01777 |
| 705 | PE | Ig | 3 min | 299 | 328 | KPAPPQGSRPSTVSFNPyEPTGGPWGPDR | y19: Phospho (+79.97)                         | 99.70% | 5.21 | 27.1 | 12.8 | 4 | 822.89  | 3,287.51 | 0.00830 |
| 706 | PE | Ig | 3 min | 299 | 328 | KPAPPQGSRPSTVSFNPyEPTGGPWGPDR | y19: Phospho (+79.97)                         | 99.70% | 2.74 | 0    | 7.59 | 3 | 1096.85 | 3,287.54 | 0.03755 |
| 707 | PE | Ig | 3 min | 299 | 328 | KPAPPQGSRPSTVSFNPyEPTGGPWGPDR | y19: Phospho (+79.97)                         | 99.70% | 3.37 | 10   | 5.92 | 3 | 1096.86 | 3,287.55 | 0.04926 |
| 708 | PE | Ig | 3 min | 299 | 328 | KPAPPQGSRPSTVSFNPyEPTGGPWGPDR | y19: Phospho (+79.97)                         | 99.70% | 3.57 | 27.8 | 9.35 | 4 | 822.89  | 3,287.55 | 0.04345 |
| 709 | PE | Ig | 3 min | 299 | 328 | KPAPPQGSRPSTVSFNPyEPTGGPWGPDR | y19: Phospho (+79.97)                         | 99.70% | 2.62 | 15.5 | 9.92 | 3 | 1096.85 | 3,287.54 | 0.03864 |
| 710 | PE | Ig | 3 min | 299 | 328 | KPAPPQGSRPSTVSFNPyEPTGGPWGPDR | y19: Phospho (+79.97)                         | 99.70% | 2.56 | 18.2 | 9.82 | 3 | 1096.86 | 3,287.55 | 0.04597 |
| 711 | PE | Ig | 3 min | 299 | 328 | KPAPPQGSRPSTVSFNPyEPTGGPWGPDR | y19: Phospho (+79.97)                         | 99.70% | 3.13 | 33.8 | 11.8 | 4 | 822.90  | 3,287.56 | 0.05151 |
| 712 | PE | Ig | 3 min | 299 | 328 | KPAPPQGSRPSTVSFNPyEPTGGPWGPDR | y19: Phospho (+79.97)                         | 99.70% | 3.58 | 26.5 | 10.7 | 4 | 822.90  | 3,287.55 | 0.04809 |
| 713 | PE | Ig | 5 min | 299 | 328 | KPAPPQGSRPSTVSFNPyEPTGGPWGPDR | y19: Phospho (+79.97)                         | 99.70% | 2.14 | 24.5 | 6.23 | 4 | 822.89  | 3,287.52 | 0.01269 |
| 714 | PE | Ig | 5 min | 299 | 328 | KPAPPQGSRPSTVSFNPyEPTGGPWGPDR | y19: Phospho (+79.97)                         | 96.70% | 0    | 0    | 3.21 | 4 | 823.39  | 3,289.52 | 2.01100 |
| 715 | PE | Ig | 5 min | 299 | 328 | KPAPPQGSRPSTVSFNPyEPTGGPWGPDR | y19: Phospho (+79.97)                         | 99.70% | 0    | 0    | 8.17 | 4 | 822.89  | 3,287.54 | 0.03295 |
| 716 | PE | Ig | 5 min | 299 | 328 | KPAPPQGSRPSTVSFNPyEPTGGPWGPDR | y19: Phospho (+79.97)                         | 99.70% | 2.68 | 17.4 | 4.17 | 3 | 1096.85 | 3,287.52 | 0.01264 |
| 717 | PE | Ig | 5 min | 299 | 328 | KPAPPQGSRPSTVSFNPyEPTGGPWGPDR | y19: Phospho (+79.97)                         | 99.70% | 3.28 | 17   | 5.39 | 3 | 1096.85 | 3,287.52 | 0.01264 |
| 718 | PE | Ig | 5 min | 299 | 328 | KPAPPQGSRPSTVSFNPyEPTGGPWGPDR | y19: Phospho (+79.97)                         | 99.70% | 3.81 | 24   | 9.21 | 4 | 822.89  | 3,287.53 | 0.02978 |
| 719 | PE | Ig | 5 min | 299 | 328 | KPAPPQGSRPSTVSFNPyEPTGGPWGPDR | y19: Phospho (+79.97)                         | 99.70% | 5.21 | 23   | 13.6 | 4 | 822.89  | 3,287.52 | 0.02002 |
| 720 | PE | Ig | 5 min | 299 | 328 | KPAPPQGSRPSTVSFNPyEPTGGPWGPDR | y19: Phospho (+79.97)                         | 99.70% | 5.69 | 45.1 | 13.7 | 4 | 822.89  | 3,287.53 | 0.03003 |
| 721 | PE | Ig | 5 min | 299 | 328 | KPAPPqGSRPSTVSFNPyEPTGGPWGPDR | q6: Deamidated (+0.98), y19: Phospho (+79.97) | 99.70% | 3.51 | 0    | 7.85 | 4 | 823.13  | 3,288.50 | 0.00914 |
| 722 | PE | Ig | 5 min | 299 | 328 | KPAPPQGSRPSTVSFNPyEPTGGPWGPDR | y19: Phospho (+79.97)                         | 99.70% | 3.66 | 40.7 | 0    | 4 | 822.89  | 3,287.51 | 0.01074 |
| 723 | PE | Ig | 5 min | 299 | 328 | KPAPPQGSRPSTVSFNPyEPTGGPWGPDR | y19: Phospho (+79.97)                         | 99.70% | 0    | 0    | 7.06 | 4 | 822.90  | 3,287.57 | 0.06689 |

|     |    |    |        |     |     |                               |                                                                        |        |      |      |      |   |         |          |          |
|-----|----|----|--------|-----|-----|-------------------------------|------------------------------------------------------------------------|--------|------|------|------|---|---------|----------|----------|
| 724 | PE | Ig | 5 min  | 299 | 328 | KPAPPQGSRPSTVSFNPyEPTGGPWGPDR | y19: Phospho (+79.97)                                                  | 99.70% | 2.93 | 13.3 | 5.92 | 4 | 822.89  | 3,287.55 | 0.04321  |
| 725 | PE | Ig | 5 min  | 299 | 328 | KPAPPQGSRPSTVSFNPyEPTGGPWGPDR | y19: Phospho (+79.97)                                                  | 99.70% | 2.05 | 23.7 | 7.82 | 3 | 1096.86 | 3,287.55 | 0.04633  |
| 726 | PE | Ig | 15 min | 299 | 328 | KPAPPQGSRPSTVSFNPyEPTGGPWGPDR | y19: Phospho (+79.97)                                                  | 99.70% | 3.42 | 0    | 5.85 | 4 | 822.89  | 3,287.53 | 0.03076  |
| 727 | PE | Ig | 15 min | 299 | 328 | KPAPPQGSRPSTVSFNPyEPTGGPWGPDR | y19: Phospho (+79.97)                                                  | 99.70% | 5.51 | 29.2 | 10.4 | 4 | 822.89  | 3,287.53 | 0.02270  |
| 728 | PE | Ig | 15 min | 299 | 328 | KPAPPqGSRPSTVSFnPyEPTGGPWGPDR | q6: Deamidated (+0.98), n17: Deamidated (+0.98), y19: Phospho (+79.97) | 99.70% | 4.53 | 17.6 | 8.8  | 4 | 823.38  | 3,289.49 | 0.01854  |
| 729 | PE | Ig | 15 min | 299 | 328 | KPAPPQGSRPSTVSFNPyEPTGGPWGPDR | y19: Phospho (+79.97)                                                  | 99.70% | 3.11 | 41.9 | 0    | 4 | 822.89  | 3,287.51 | 0.01049  |
| 730 | PE | Ig | 15 min | 299 | 328 | KPAPPQGSRPSTVSFNPyEPTGGPWGPDR | y19: Phospho (+79.97)                                                  | 99.70% | 3.05 | 24   | 5.48 | 4 | 822.89  | 3,287.53 | 0.03027  |
| 731 | PE | Ig | 15 min | 299 | 328 | KPAPPQGSRPSTVSFNPyEPTGGPWGPDR | y19: Phospho (+79.97)                                                  | 99.70% | 1.67 | 16.4 | 4.48 | 3 | 1096.86 | 3,287.55 | 0.04157  |
| 732 | PE | Hg | 0      | 299 | 328 | KPAPPQGSRPSTVSFNPyEPTGGPWGPDR | y19: Phospho (+79.97)                                                  | 99.70% | 3.81 | 0    | 6.89 | 4 | 822.89  | 3,287.52 | 0.01757  |
| 733 | PE | Hg | 0      | 299 | 328 | KPAPPQGSRPSTVSFNPyEPTGGPWGPDR | t22: Phospho (+79.97)                                                  | 99.40% | 0.85 | 16.1 | 0    | 4 | 822.88  | 3,287.50 | 0.00048  |
| 734 | PE | Hg | 0      | 299 | 328 | KPAPPQGSRPSTVSFNPyEPTGGPWGPDR | y19: Phospho (+79.97)                                                  | 99.70% | 2.41 | 21.8 | 7.62 | 4 | 822.89  | 3,287.55 | 0.04394  |
| 735 | PE | Hg | 5 µM   | 299 | 328 | KPAPPQGSRPSTVSFNPyEPTGGPWGPDR | y19: Phospho (+79.97)                                                  | 99.70% | 1.32 | 24.7 | 2.27 | 4 | 822.89  | 3,287.52 | 0.01367  |
| 736 | PE | Hg | 5 µM   | 299 | 328 | KPAPPQGSRPSTVSFNPyEPTGGPWGPDR | y19: Phospho (+79.97)                                                  | 99.70% | 2.97 | 16.5 | 6.62 | 4 | 822.89  | 3,287.54 | 0.03247  |
| 737 | PE | Hg | 10 µM  | 299 | 328 | KPAPPQGSRPSTVSFNPyEPTGGPWGPDR | y19: Phospho (+79.97)                                                  | 99.70% | 4.54 | 0    | 5.43 | 4 | 822.89  | 3,287.52 | 0.01196  |
| 738 | PE | Hg | 10 µM  | 299 | 328 | KPAPPQGSRPSTVSFNPyEPTGGPWGPDR | y19: Phospho (+79.97)                                                  | 99.70% | 4.2  | 10.5 | 6.43 | 4 | 822.89  | 3,287.52 | 0.01098  |
| 739 | PE | Hg | 10 µM  | 299 | 328 | KPAPPQGSRPSTVSFNPyEPTGGPWGPDR | y19: Phospho (+79.97)                                                  | 99.70% | 0    | 14   | 4.62 | 4 | 822.89  | 3,287.55 | 0.04150  |
| 740 | PE | Hg | 20 µM  | 299 | 328 | KPAPPQGSRPSTVSFNPyEPTGGPWGPDR | y19: Phospho (+79.97)                                                  | 99.70% | 3.86 | 0    | 4.74 | 4 | 822.89  | 3,287.54 | 0.03100  |
| 741 | PE | Hg | 50 µM  | 299 | 328 | KPAPPQGSRPSTVSFNPyEPTGGPWGPDR | y19: Phospho (+79.97)                                                  | 99.70% | 4.44 | 14.9 | 4.4  | 4 | 822.89  | 3,287.52 | 0.01586  |
| 742 | PE | Hg | 50 µM  | 299 | 328 | KPAPPQGSRPSTVSFNPyEPTGGPWGPDR | n17: Deamidated (+0.98), y19: Phospho (+79.97)                         | 99.70% | 3.19 | 0    | 4.92 | 4 | 823.13  | 3,288.50 | 0.01622  |
| 743 | PE | Hg | 50 µM  | 299 | 328 | KPAPPQGSRPSTVSFNPyEPTGGPWGPDR | y19: Phospho (+79.97)                                                  | 99.70% | 0    | 19   | 7.7  | 4 | 822.89  | 3,287.54 | 0.03247  |
| 744 | PE | Hg | 50 µM  | 299 | 328 | KPAPPQGSRPSTVSFNPyEPTGGPWGPDR | y19: Phospho (+79.97)                                                  | 99.70% | 5.62 | 12.9 | 7.22 | 4 | 822.89  | 3,287.52 | 0.01635  |
| 745 | PE | Hg | 50 µM  | 299 | 328 | KPAPPQGSRPSTVSFNPyEPTGGPWGPDR | y19: Phospho (+79.97)                                                  | 99.70% | 5.84 | 26.3 | 9.25 | 4 | 822.89  | 3,287.53 | 0.02807  |
| 746 | PE | Hg | 50 µM  | 299 | 328 | KPAPPQGSRPSTVSFNPyEPTGGPWGPDR | y19: Phospho (+79.97)                                                  | 99.70% | 5.26 | 22.8 | 9.16 | 4 | 822.89  | 3,287.53 | 0.02246  |
| 747 | PE | Hg | 50 µM  | 299 | 328 | KPAPPQGSRPSTVSFNPyEPTGGPWGPDR | y19: Phospho (+79.97)                                                  | 99.70% | 5.63 | 21.9 | 10.2 | 4 | 822.89  | 3,287.51 | 0.01049  |
| 748 | PE | Hg | 50 µM  | 299 | 328 | KPAPPQGSRPSTVSFNPyEPTGGPWGPDR | y19: Phospho (+79.97)                                                  | 99.70% | 4.91 | 0    | 7.32 | 3 | 1096.84 | 3,287.50 | -0.00091 |
| 749 | PE | Hg | 50 µM  | 299 | 328 | KPAPPQGSRPSTVSFNPyEPTGGPWGPDR | y19: Phospho (+79.97)                                                  | 99.70% | 5.03 | 24.8 | 9.82 | 4 | 822.89  | 3,287.51 | 0.00854  |
| 750 | PE | Hg | 50 µM  | 299 | 328 | KPAPPQGSRPSTVSFNPyEPTGGPWGPDR | y19: Phospho (+79.97)                                                  | 99.70% | 5.72 | 16.9 | 9.82 | 4 | 822.88  | 3,287.50 | -0.00147 |
| 751 | PE | Hg | 50 µM  | 299 | 328 | KPAPPQGSRPSTVSFNPyEPTGGPWGPDR | y19: Phospho (+79.97)                                                  | 99.70% | 1.91 | 16.1 | 3.37 | 4 | 822.89  | 3,287.52 | 0.01367  |
| 752 | PE | Hg | 50 µM  | 299 | 328 | KPAPPQGSRPSTVSFNPyEPTGGPWGPDR | y19: Phospho (+79.97)                                                  | 99.70% | 3.06 | 0    | 3.55 | 3 | 1096.86 | 3,287.57 | 0.06172  |
| 753 | PE | Hg | 50 µM  | 299 | 328 | KPAPPQGSRPSTVSFNPyEPTGGPWGPDR | n17: Deamidated (+0.98), y19: Phospho (+79.97)                         | 99.70% | 3.02 | 25.2 | 6.01 | 4 | 823.14  | 3,288.55 | 0.05944  |
| 754 | PE | Hg | 50 µM  | 299 | 328 | KPAPPQGSRPSTVSFNPyEPTGGPWGPDR | y19: Phospho (+79.97)                                                  | 99.70% | 3.44 | 0    | 6.59 | 4 | 822.90  | 3,287.56 | 0.05200  |
| 755 | PE | Hg | 50 µM  | 299 | 328 | KPAPPQGSRPSTVSFNPyEPTGGPWGPDR | y19: Phospho (+79.97)                                                  | 99.70% | 2.99 | 13.9 | 7.54 | 4 | 822.90  | 3,287.56 | 0.05835  |
| 756 | PE | Hg | 50 µM  | 299 | 328 | KPAPPQGSRPSTVSFNPyEPTGGPWGPDR | y19: Phospho (+79.97)                                                  | 99.70% | 3.35 | 19   | 8.62 | 3 | 1096.86 | 3,287.55 | 0.04185  |
| 757 | PE | Hg | 50 µM  | 299 | 328 | KPAPPQGSRPSTVSFNPyEPTGGPWGPDR | y19: Phospho (+79.97)                                                  | 99.70% | 2.82 | 19   | 9.64 | 3 | 1096.86 | 3,287.56 | 0.05293  |
| 758 | PE | Hg | 50 µM  | 299 | 328 | KPAPPQGSRPSTVSFNPyEPTGGPWGPDR | y19: Phospho (+79.97)                                                  | 99.70% | 3.37 | 14.9 | 8.96 | 4 | 822.89  | 3,287.55 | 0.04296  |
| 759 | PE | Hg | 50 µM  | 299 | 328 | KPAPPQGSRPSTVSFNPyEPTGGPWGPDR | y19: Phospho (+79.97)                                                  | 99.70% | 2.55 | 18.9 | 9.96 | 3 | 1096.86 | 3,287.56 | 0.05732  |
| 760 | PE | Hg | 50 µM  | 299 | 328 | KPAPPQGSRPSTVSFNPyEPTGGPWGPDR | y19: Phospho (+79.97)                                                  | 99.70% | 3.73 | 20.4 | 8.92 | 4 | 822.89  | 3,287.55 | 0.04296  |
| 761 | PE | Hg | 50 µM  | 299 | 328 | KPAPPQGSRPSTVSFNPyEPTGGPWGPDR | y19: Phospho (+79.97)                                                  | 99.70% | 3.38 | 26.9 | 10.6 | 4 | 822.89  | 3,287.55 | 0.04394  |
| 762 | PE | Hg | 50 µM  | 299 | 328 | KPAPPQGSRPSTVSFNPyEPTGGPWGPDR | y19: Phospho (+79.97)                                                  | 99.70% | 3.41 | 26.7 | 10.6 | 4 | 822.89  | 3,287.55 | 0.04638  |
| 763 | PE | Hg | 50 µM  | 299 | 328 | KPAPPQGSRPSTVSFNPyEPTGGPWGPDR | y19: Phospho (+79.97)                                                  | 99.70% | 3.65 | 28.4 | 11   | 4 | 822.89  | 3,287.55 | 0.04614  |
| 764 | PE | Hg | 50 µM  | 299 | 328 | KPAPPQGSRPSTVSFNPyEPTGGPWGPDR | y19: Phospho (+79.97)                                                  | 99.70% | 3.4  | 20   | 10.9 | 3 | 1096.86 | 3,287.54 | 0.03938  |

|     |    |    |        |     |     |                               |                                                                        |        |      |      |      |   |         |          |          |
|-----|----|----|--------|-----|-----|-------------------------------|------------------------------------------------------------------------|--------|------|------|------|---|---------|----------|----------|
| 765 | PE | Hg | 50 µM  | 299 | 328 | KPAPPQGSRPSTVSFNPyEPTGGPWGPDR | y19: Phospho (+79.97)                                                  | 99.70% | 3.91 | 30   | 12   | 4 | 822.90  | 3,287.55 | 0.04956  |
| 766 | PE | Hg | 50 µM  | 299 | 328 | KPAPPQGSRPSTVSFNPyEPTGGPWGPDR | y19: Phospho (+79.97)                                                  | 99.70% | 3.78 | 23.3 | 10.2 | 4 | 822.89  | 3,287.55 | 0.04126  |
| 767 | PE | Hg | 100 µM | 299 | 328 | KPAPPQGSRPSTVSFNPyEPTGGPWGPDR | y19: Phospho (+79.97)                                                  | 99.70% | 2.62 | 20.7 | 6.89 | 3 | 1096.85 | 3,287.51 | 0.00971  |
| 768 | PE | Hg | 100 µM | 299 | 328 | KPAPPQGSRPSTVSFNPyEPTGGPWGPDR | y19: Phospho (+79.97)                                                  | 99.70% | 3.86 | 22.7 | 11.1 | 4 | 822.88  | 3,287.49 | -0.01099 |
| 769 | PE | Hg | 100 µM | 299 | 328 | KPAPPqGSRPSTVSFNPyEPTGGPWGPDR | q6: Deamidated (+0.98), y19: Phospho (+79.97)                          | 99.20% | 0    | 28.1 | 9.32 | 4 | 823.14  | 3,288.52 | 0.02819  |
| 770 | PE | Hg | 100 µM | 299 | 328 | KPAPPQGSRPSTVSFNPyEPTGGPWGPDR | y19: Phospho (+79.97)                                                  | 99.50% | 0    | 27   | 11   | 4 | 822.89  | 3,287.53 | 0.02563  |
| 771 | PE | Hg | 100 µM | 299 | 328 | KPAPPQGSRPSTVSFNPyEPTGGPWGPDR | y19: Phospho (+79.97)                                                  | 99.60% | 0    | 23.1 | 11.1 | 4 | 822.89  | 3,287.51 | 0.00854  |
| 772 | PE | Hg | 100 µM | 299 | 328 | KPAPPQGSRPSTVSFNPyEPTGGPWGPDR | y19: Phospho (+79.97)                                                  | 99.70% | 0    | 21.9 | 11.1 | 4 | 822.89  | 3,287.52 | 0.01220  |
| 773 | PE | Hg | 100 µM | 299 | 328 | KPAPPQGSRPSTVSFNPyEPTGGPWGPDR | y19: Phospho (+79.97)                                                  | 99.70% | 0    | 30.2 | 13.3 | 4 | 822.89  | 3,287.53 | 0.02661  |
| 774 | PE | Hg | 100 µM | 299 | 328 | KPAPPqGSRPSTVSFNPyEPTGGPWGPDR | q6: Deamidated (+0.98), y19: Phospho (+79.97)                          | 99.70% | 0    | 19.4 | 6.09 | 4 | 823.14  | 3,288.51 | 0.02355  |
| 775 | PE | Hg | 100 µM | 299 | 328 | KPAPPQGSRPSTVSFNPyEPTGGPWGPDR | y19: Phospho (+79.97)                                                  | 99.70% | 0    | 16.4 | 6.6  | 3 | 1096.85 | 3,287.53 | 0.02143  |
| 776 | PE | Hg | 100 µM | 299 | 328 | KPAPPQGSRPSTVSFNPyEPTGGPWGPDR | y19: Phospho (+79.97)                                                  | 99.70% | 0    | 11.3 | 7.12 | 4 | 822.89  | 3,287.52 | 0.01562  |
| 777 | PE | Hg | 100 µM | 299 | 328 | KPAPPQGSRPSTVSFNPyEPTGGPWGPDR | y19: Phospho (+79.97)                                                  | 99.70% | 0    | 12   | 8    | 3 | 1096.85 | 3,287.52 | 0.01740  |
| 778 | PE | Hg | 100 µM | 299 | 328 | KPAPPQGSRPSTVSFNPyEPTGGPWGPDR | y19: Phospho (+79.97)                                                  | 99.70% | 0    | 20.8 | 14.9 | 3 | 1096.85 | 3,287.52 | 0.01740  |
| 779 | PE | Hg | 100 µM | 299 | 328 | KPAPPqGSRPSTVSFNPyEPTGGPWGPDR | q6: Deamidated (+0.98), y19: Phospho (+79.97)                          | 99.70% | 0    | 0    | 10.1 | 4 | 823.14  | 3,288.52 | 0.03331  |
| 780 | PE | Hg | 100 µM | 299 | 328 | KPAPPQGSRPSTVSFNPyEPTGGPWGPDR | y19: Phospho (+79.97)                                                  | 99.70% | 4.2  | 16.5 | 6.47 | 4 | 822.89  | 3,287.51 | 0.00708  |
| 781 | PE | Hg | 100 µM | 299 | 328 | KPAPPQGSRPSTVSFNPyEPTGGPWGPDR | y19: Phospho (+79.97)                                                  | 99.70% | 4.83 | 11.1 | 7.27 | 4 | 822.88  | 3,287.51 | 0.00268  |
| 782 | PE | Hg | 100 µM | 299 | 328 | KPAPPqGSRPSTVSFnPyEPTGGPWGPDR | q6: Deamidated (+0.98), n17: Deamidated (+0.98), y19: Phospho (+79.97) | 99.70% | 4.99 | 24.7 | 9.89 | 4 | 823.38  | 3,289.50 | 0.02806  |
| 783 | PE | Hg | 100 µM | 299 | 328 | KPAPPQGSRPSTVSFNPyEPTGGPWGPDR | y19: Phospho (+79.97)                                                  | 99.70% | 0    | 0    | 7.05 | 4 | 823.40  | 3,289.55 | 2.04800  |
| 784 | PE | Hg | 100 µM | 299 | 328 | KPAPPQGSRPSTVSFNPyEPTGGPWGPDR | y19: Phospho (+79.97)                                                  | 99.70% | 2.83 | 13.1 | 5.43 | 3 | 1096.86 | 3,287.55 | 0.04487  |
| 785 | PE | Hg | 100 µM | 299 | 328 | KPAPPQGSRPSTVSFNPyEPTGGPWGPDR | y19: Phospho (+79.97)                                                  | 99.70% | 2.56 | 16   | 6.52 | 3 | 1096.86 | 3,287.55 | 0.04414  |
| 786 | PE | Hg | 100 µM | 299 | 328 | KPAPPQGSRPSTVSFNPyEPTGGPWGPDR | y19: Phospho (+79.97)                                                  | 99.70% | 2.96 | 10.6 | 7.03 | 4 | 822.90  | 3,287.55 | 0.04809  |
| 787 | PE | Hg | 100 µM | 299 | 328 | KPAPPQGSRPSTVSFNPyEPTGGPWGPDR | y19: Phospho (+79.97)                                                  | 99.70% | 3.49 | 19.4 | 11.4 | 4 | 822.90  | 3,287.56 | 0.05639  |
| 788 | PE | Hg | 100 µM | 299 | 328 | KPAPPQGSRPSTVSFNPyEPTGGPWGPDR | y19: Phospho (+79.97)                                                  | 99.70% | 3.23 | 22.6 | 11.2 | 3 | 1096.86 | 3,287.57 | 0.06245  |
| 789 | PE | Hg | 100 µM | 299 | 328 | KPAPPQGSRPSTVSFNPyEPTGGPWGPDR | y19: Phospho (+79.97)                                                  | 99.70% | 3.49 | 19.8 | 12   | 4 | 822.89  | 3,287.55 | 0.04492  |
| 790 | PE | Hg | 100 µM | 299 | 328 | KPAPPQGSRPSTVSFNPyEPTGGPWGPDR | y19: Phospho (+79.97)                                                  | 99.70% | 2.9  | 31.5 | 11.7 | 4 | 822.90  | 3,287.55 | 0.04956  |
| 791 | PE | Hg | 100 µM | 299 | 328 | KPAPPQGSRPSTVSFNPyEPTGGPWGPDR | y19: Phospho (+79.97)                                                  | 99.70% | 3.48 | 20.5 | 11   | 4 | 822.89  | 3,287.55 | 0.04663  |
| 792 | PE | PV | 0      | 299 | 328 | KPAPPQGSRPSTVSFNPyEPTGGPWGPDR | y19: Phospho (+79.97)                                                  | 99.70% | 4.63 | 11.9 | 5.92 | 4 | 822.89  | 3,287.53 | 0.02417  |
| 793 | PE | PV | 0      | 299 | 328 | KPAPPQGSRPSTVSFNPyEPTGGPWGPDR | y19: Phospho (+79.97)                                                  | 99.70% | 2.41 | 21.8 | 7.62 | 4 | 822.89  | 3,287.55 | 0.04394  |
| 794 | PE | PV | 1 µM   | 299 | 328 | KPAPPQGSRPSTVSFNPyEPTGGPWGPDR | y19: Phospho (+79.97)                                                  | 93.00% | 2.4  | 0    | 3.8  | 4 | 822.89  | 3,287.52 | 0.01904  |
| 795 | PE | PV | 3 µM   | 299 | 328 | KPAPPQGSRPSTVSFNPyEPTGGPWGPDR | y19: Phospho (+79.97)                                                  | 99.70% | 3.95 | 14.5 | 6.42 | 4 | 822.89  | 3,287.52 | 0.01586  |
| 796 | PE | PV | 10 µM  | 299 | 328 | KPAPPQGSRPSTVSFNPyEPTGGPWGPDR | y19: Phospho (+79.97)                                                  | 99.60% | 1.88 | 12.9 | 2.27 | 4 | 822.89  | 3,287.51 | 0.00781  |
| 797 | PE | PV | 10 µM  | 299 | 328 | KPAPPQGSRPSTVSFNPyEPTGGPWGPDR | y19: Phospho (+79.97)                                                  | 99.70% | 3.2  | 22.2 | 8.92 | 3 | 1096.85 | 3,287.51 | 0.00971  |
| 798 | PE | PV | 10 µM  | 299 | 328 | KPAPPQGSRPSTVSFNPyEPTGGPWGPDR | y19: Phospho (+79.97)                                                  | 99.70% | 5.17 | 12.5 | 8.04 | 3 | 1096.84 | 3,287.51 | 0.00202  |
| 799 | PE | PV | 10 µM  | 299 | 328 | KPAPPQGSRPSTVSFNPyEPTGGPWGPDR | y19: Phospho (+79.97)                                                  | 99.70% | 5.23 | 31.4 | 11.7 | 4 | 822.88  | 3,287.50 | -0.00025 |
| 800 | PE | PV | 10 µM  | 299 | 328 | KPAPPqGSRPSTVSFNPyEPTGGPWGPDR | q6: Deamidated (+0.98), y19: Phospho (+79.97)                          | 99.70% | 2.65 | 22.5 | 5.7  | 3 | 1097.18 | 3,288.50 | 0.01520  |
| 801 | PE | PV | 10 µM  | 299 | 328 | KPAPPQGSRPSTVSFNPyEPTGGPWGPDR | y19: Phospho (+79.97)                                                  | 99.70% | 4.8  | 0    | 5.66 | 4 | 822.89  | 3,287.52 | 0.01440  |
| 802 | PE | PV | 10 µM  | 299 | 328 | KPAPPQGSRPSTVSFNPyEPTGGPWGPDR | y19: Phospho (+79.97)                                                  | 99.70% | 3.01 | 22.6 | 8.18 | 3 | 1096.85 | 3,287.52 | 0.01631  |
| 803 | PE | PV | 10 µM  | 299 | 328 | KPAPPQGSRPSTVSFNPyEPTGGPWGPDR | y19: Phospho (+79.97)                                                  | 99.70% | 4.43 | 24.6 | 10.5 | 3 | 1096.85 | 3,287.52 | 0.01667  |



|     |    |    |       |     |     |                               |                                                                        |        |      |      |      |   |         |          |          |
|-----|----|----|-------|-----|-----|-------------------------------|------------------------------------------------------------------------|--------|------|------|------|---|---------|----------|----------|
| 804 | PE | PV | 10 µM | 299 | 328 | KPAPPQGSRPSTVSFNPyEPTGGPWGPDR | y19: Phospho (+79.97)                                                  | 99.70% | 5.39 | 35.5 | 8.96 | 4 | 822.89  | 3,287.52 | 0.01269  |
| 805 | PE | PV | 10 µM | 299 | 328 | KPAPPQGSRPSTVSFNPyEPTGGPWGPDR | y19: Phospho (+79.97)                                                  | 99.70% | 3.59 | 25.6 | 12.1 | 3 | 1096.85 | 3,287.52 | 0.02033  |
| 806 | PE | PV | 10 µM | 299 | 328 | KPAPPQGSRPSTVSFNPyEPTGGPWGPDR | y19: Phospho (+79.97)                                                  | 99.70% | 5.26 | 32.8 | 10.3 | 4 | 822.89  | 3,287.52 | 0.01611  |
| 807 | PE | PV | 10 µM | 299 | 328 | KPAPPQGSRPSTVSFNPyEPTGGPWGPDR | y19: Phospho (+79.97)                                                  | 99.70% | 6.14 | 25   | 9.85 | 4 | 822.89  | 3,287.51 | 0.00756  |
| 808 | PE | PV | 10 µM | 299 | 328 | KPAPPQGSRPSTVSFNPyEPTGGPWGPDR | y19: Phospho (+79.97)                                                  | 99.70% | 6.26 | 30.2 | 11.8 | 4 | 822.89  | 3,287.51 | 0.01049  |
| 809 | PE | PV | 10 µM | 299 | 328 | KPAPPQGSRPSTVSFNPyEPTGGPWGPDR | y19: Phospho (+79.97)                                                  | 99.70% | 7.35 | 32.4 | 12.4 | 4 | 822.89  | 3,287.52 | 0.01294  |
| 810 | PE | PV | 10 µM | 299 | 328 | KPAPPqGSRPSTVSFNPyEPTGGPWGPDR | q6: Deamidated (+0.98), y19: Phospho (+79.97)                          | 99.70% | 4.29 | 48.5 | 9.92 | 4 | 823.14  | 3,288.52 | 0.03112  |
| 811 | PE | PV | 10 µM | 299 | 328 | KPAPPqGSRPSTVSFNPyEPTGGPWGPDR | q6: Deamidated (+0.98), y19: Phospho (+79.97)                          | 99.70% | 5.31 | 36   | 13.5 | 4 | 823.13  | 3,288.51 | 0.01867  |
| 812 | PE | PV | 10 µM | 299 | 328 | KPAPPqGSRPSTVSFNPyEPTGGPWGPDR | q6: Deamidated (+0.98), y19: Phospho (+79.97)                          | 99.70% | 4.95 | 42.8 | 11.2 | 4 | 823.13  | 3,288.51 | 0.02111  |
| 813 | PE | PV | 10 µM | 299 | 328 | KPAPPQGSRPSTVSFNPyEPTGGPWGPDR | y19: Phospho (+79.97)                                                  | 99.70% | 6.39 | 37.8 | 14.5 | 4 | 822.89  | 3,287.51 | 0.01025  |
| 814 | PE | PV | 10 µM | 299 | 328 | KPAPPqGSRPSTVSFNPyEPTGGPWGPDR | q6: Deamidated (+0.98), y19: Phospho (+79.97)                          | 99.70% | 5.51 | 37.6 | 13.1 | 4 | 823.13  | 3,288.50 | 0.01598  |
| 815 | PE | PV | 10 µM | 299 | 328 | KPAPPQGSRPSTVSFNPyEPTGGPWGPDR | y19: Phospho (+79.97)                                                  | 99.70% | 6.35 | 36.2 | 12.8 | 4 | 822.89  | 3,287.52 | 0.01171  |
| 816 | PE | PV | 10 µM | 299 | 328 | KPAPPqGSRPSTVSFNPyEPTGGPWGPDR | q6: Deamidated (+0.98), y19: Phospho (+79.97)                          | 99.70% | 5.31 | 44.6 | 12.1 | 4 | 823.13  | 3,288.51 | 0.01818  |
| 817 | PE | PV | 10 µM | 299 | 328 | KPAPPQGSRPSTVSFNPyEPTGGPWGPDR | y19: Phospho (+79.97)                                                  | 99.70% | 6.64 | 37.5 | 14.8 | 4 | 822.89  | 3,287.52 | 0.01171  |
| 818 | PE | PV | 10 µM | 299 | 328 | KPAPPQGSRPSTVSFNPyEPTGGPWGPDR | y19: Phospho (+79.97)                                                  | 99.70% | 6.07 | 25   | 11.4 | 3 | 1096.85 | 3,287.51 | 0.01081  |
| 819 | PE | PV | 10 µM | 299 | 328 | KPAPPQGSRPSTVSFNPyEPTGGPWGPDR | y19: Phospho (+79.97)                                                  | 99.70% | 5.95 | 21.5 | 10.5 | 3 | 1096.85 | 3,287.52 | 0.01557  |
| 820 | PE | PV | 10 µM | 299 | 328 | KPAPPQGSRPSTVSFNPyEPTGGPWGPDR | y19: Phospho (+79.97)                                                  | 99.70% | 6.03 | 21.6 | 15.3 | 3 | 1096.85 | 3,287.52 | 0.01704  |
| 821 | PE | PV | 10 µM | 299 | 328 | KPAPPQGSRPSTVSFNPyEPTGGPWGPDR | y19: Phospho (+79.97)                                                  | 99.70% | 5.14 | 36.5 | 15.1 | 3 | 1096.85 | 3,287.52 | 0.01338  |
| 822 | PE | PV | 10 µM | 299 | 328 | KPAPPqGSRPSTVSFNPyEPTGGPWGPDR | q6: Deamidated (+0.98), y19: Phospho (+79.97)                          | 99.70% | 2.77 | 14.2 | 4.08 | 3 | 1097.17 | 3,288.49 | 0.00019  |
| 823 | PE | PV | 10 µM | 299 | 328 | KPAPPqGSRPSTVSFnPyEPTGGPWGPDR | q6: Deamidated (+0.98), n17: Deamidated (+0.98), y19: Phospho (+79.97) | 99.70% | 0    | 0    | 11.1 | 3 | 1097.84 | 3,290.49 | 1.02200  |
| 824 | PE | PV | 10 µM | 299 | 328 | KPAPPqGSRPSTVSFNPyEPTGGPWGPDR | q6: Deamidated (+0.98), y19: Phospho (+79.97)                          | 99.70% | 3.44 | 24   | 6.92 | 3 | 1097.17 | 3,288.48 | -0.00824 |
| 825 | PE | PV | 10 µM | 299 | 328 | KPAPPQGSRPSTVSFNPyEPTGGPWGPDR | y19: Phospho (+79.97)                                                  | 99.70% | 5.36 | 31.7 | 9.55 | 4 | 822.89  | 3,287.51 | 0.00854  |
| 826 | PE | PV | 10 µM | 299 | 328 | KPAPPQGSRPSTVSFNPyEPTGGPWGPDR | y19: Phospho (+79.97)                                                  | 99.70% | 5.97 | 35.7 | 11.7 | 4 | 822.88  | 3,287.51 | 0.00561  |
| 827 | PE | PV | 10 µM | 299 | 328 | KPAPPQGSRPSTVSFNPyEPTGGPWGPDR | y19: Phospho (+79.97)                                                  | 99.70% | 3.62 | 26   | 9.85 | 4 | 822.88  | 3,287.49 | -0.01123 |
| 828 | PE | PV | 10 µM | 299 | 328 | KPAPPQGSRPSTVSFNPyEPTGGPWGPDR | y19: Phospho (+79.97)                                                  | 99.70% | 3.06 | 20.3 | 14.8 | 3 | 1096.85 | 3,287.53 | 0.03022  |
| 829 | PE | PV | 10 µM | 299 | 328 | KPAPPqGSRPSTVSFNPyEPTGGPWGPDR | q6: Deamidated (+0.98), y19: Phospho (+79.97)                          | 99.70% | 3.61 | 12.8 | 7.2  | 3 | 1097.18 | 3,288.51 | 0.01959  |
| 830 | PE | PV | 10 µM | 299 | 328 | KPAPPqGSRPSTVSFNPyEPTGGPWGPDR | q6: Deamidated (+0.98), y19: Phospho (+79.97)                          | 99.70% | 4.18 | 27.3 | 11.9 | 4 | 823.13  | 3,288.50 | 0.01256  |
| 831 | PE | PV | 10 µM | 299 | 328 | KPAPPqGSRPSTVSFNPyEPTGGPWGPDR | q6: Deamidated (+0.98), y19: Phospho (+79.97)                          | 99.70% | 5.21 | 32.1 | 11.5 | 4 | 823.13  | 3,288.50 | 0.01574  |
| 832 | PE | PV | 10 µM | 299 | 328 | KPAPPqGSRPSTVSFNPyEPTGGPWGPDR | q6: Deamidated (+0.98), y19: Phospho (+79.97)                          | 99.70% | 4.68 | 35   | 9.34 | 4 | 823.13  | 3,288.50 | 0.01525  |
| 833 | PE | PV | 10 µM | 299 | 328 | KPAPPqGSRPSTVSFNPyEPTGGPWGPDR | q6: Deamidated (+0.98), y19: Phospho (+79.97)                          | 99.70% | 4.77 | 20.1 | 10   | 3 | 1097.18 | 3,288.51 | 0.02509  |

|     |    |    |       |     |     |                                |                                                   |        |      |      |      |   |         |          |          |
|-----|----|----|-------|-----|-----|--------------------------------|---------------------------------------------------|--------|------|------|------|---|---------|----------|----------|
| 834 | PE | PV | 10 µM | 299 | 328 | KPAPPqGSRPESTVSFNPyEPTGGPWGPDR | q6: Deamidated (+0.98), y19:<br>Phospho (+79.97)  | 99.70% | 5    | 31.6 | 10.2 | 4 | 823.13  | 3,288.50 | 0.00841  |
| 835 | PE | PV | 10 µM | 299 | 328 | KPAPPQGSRPSTVSFNPyEPTGGPWGPDR  | y19: Phospho (+79.97)                             | 99.70% | 5.22 | 36.9 | 11.3 | 4 | 822.88  | 3,287.51 | 0.00390  |
| 836 | PE | PV | 10 µM | 299 | 328 | KPAPPQGSRPSTVSFNPyEPTGGPWGPDR  | y19: Phospho (+79.97)                             | 99.70% | 5.61 | 26.8 | 9.7  | 4 | 822.88  | 3,287.50 | -0.00196 |
| 837 | PE | PV | 10 µM | 299 | 328 | KPAPPqGSRPESTVSFNPyEPTGGPWGPDR | q6: Deamidated (+0.98), y19:<br>Phospho (+79.97)  | 99.70% | 5.64 | 39.4 | 12.7 | 4 | 823.13  | 3,288.50 | 0.00939  |
| 838 | PE | PV | 10 µM | 299 | 328 | KPAPPQGSRPSTVSFNPyEPTGGPWGPDR  | y19: Phospho (+79.97)                             | 99.70% | 5.83 | 35   | 10.6 | 4 | 822.88  | 3,287.51 | 0.00366  |
| 839 | PE | PV | 10 µM | 299 | 328 | KPAPPQGSRPSTVSFNPyEPTGGPWGPDR  | y19: Phospho (+79.97)                             | 99.70% | 4.98 | 21.9 | 13.9 | 3 | 1096.85 | 3,287.53 | 0.02509  |
| 840 | PE | PV | 10 µM | 299 | 328 | KPAPPQGSRPSTVSFNPyEPTGGPWGPDR  | y19: Phospho (+79.97)                             | 99.70% | 5.82 | 14.7 | 13   | 3 | 1096.84 | 3,287.50 | -0.00164 |
| 841 | PE | PV | 10 µM | 299 | 328 | KPAPPQGSRPSTVSFNPyEPTGGPWGPDR  | y19: Phospho (+79.97)                             | 99.70% | 5.61 | 22.1 | 7.66 | 3 | 1096.85 | 3,287.52 | 0.01887  |
| 842 | PE | PV | 10 µM | 299 | 328 | KPAPPQGSRPSTVSFNPyEPTGGPWGPDR  | y19: Phospho (+79.97)                             | 99.70% | 6.45 | 36.2 | 13.3 | 4 | 822.88  | 3,287.51 | 0.00390  |
| 843 | PE | PV | 10 µM | 299 | 328 | KPAPPQGSRPSTVSFNPyEPTGGPWGPDR  | y19: Phospho (+79.97)                             | 99.70% | 6.57 | 26.6 | 12.5 | 3 | 1096.84 | 3,287.51 | 0.00276  |
| 844 | PE | PV | 10 µM | 299 | 328 | KPAPPQGSRPSTVSFNPyEPTGGPWGPDR  | y19: Phospho (+79.97)                             | 99.70% | 6.62 | 38.5 | 12.7 | 3 | 1096.85 | 3,287.53 | 0.02143  |
| 845 | PE | PV | 10 µM | 299 | 328 | KPAPPQGSRPSTVSFNPyEPTGGPWGPDR  | y19: Phospho (+79.97)                             | 99.70% | 3.39 | 27.6 | 6.51 | 4 | 822.89  | 3,287.51 | 0.00732  |
| 846 | PE | PV | 10 µM | 299 | 328 | KPAPPQGSRPSTVSFNPyEPTGGPWGPDR  | n17: Deamidated (+0.98), y19:<br>Phospho (+79.97) | 99.70% | 0    | 0    | 10.2 | 3 | 1097.53 | 3,289.56 | 1.07000  |
| 847 | PE | PV | 10 µM | 299 | 328 | KPAPPQGSRPSTVSFNPyEPTGGPWGPDR  | y19: Phospho (+79.97)                             | 99.70% | 0    | 15.9 | 5.74 | 3 | 1096.86 | 3,287.55 | 0.04341  |
| 848 | PE | PV | 10 µM | 299 | 328 | KPAPPQGSRPSTVSFNPyEPTGGPWGPDR  | y19: Phospho (+79.97)                             | 99.70% | 2.13 | 50.5 | 6.85 | 4 | 822.89  | 3,287.54 | 0.03881  |
| 849 | PE | PV | 10 µM | 299 | 328 | KPAPPQGSRPSTVSFNPyEPTGGPWGPDR  | y19: Phospho (+79.97)                             | 99.70% | 4.47 | 22.3 | 6.43 | 3 | 1096.86 | 3,287.56 | 0.05183  |
| 850 | PE | PV | 10 µM | 299 | 328 | KPAPPQGSRPSTVSFNPyEPTGGPWGPDR  | y19: Phospho (+79.97)                             | 99.70% | 3.14 | 0    | 6.74 | 3 | 1096.86 | 3,287.55 | 0.05073  |
| 851 | PE | PV | 10 µM | 299 | 328 | KPAPPQGSRPSTVSFNPyEPTGGPWGPDR  | y19: Phospho (+79.97)                             | 99.70% | 2.64 | 18.6 | 8.54 | 3 | 1096.86 | 3,287.56 | 0.05403  |
| 852 | PE | PV | 10 µM | 299 | 328 | KPAPPQGSRPSTVSFNPyEPTGGPWGPDR  | y19: Phospho (+79.97)                             | 99.70% | 3.82 | 14.9 | 9.06 | 3 | 1096.86 | 3,287.56 | 0.05403  |
| 853 | PE | PV | 10 µM | 299 | 328 | KPAPPQGSRPSTVSFNPyEPTGGPWGPDR  | y19: Phospho (+79.97)                             | 99.70% | 3.38 | 12.9 | 10.7 | 3 | 1096.86 | 3,287.56 | 0.05622  |
| 854 | PE | PV | 10 µM | 299 | 328 | KPAPPQGSRPSTVSFNPyEPTGGPWGPDR  | y19: Phospho (+79.97)                             | 99.70% | 3.15 | 26.5 | 12.3 | 3 | 1096.86 | 3,287.56 | 0.05219  |
| 855 | PE | PV | 10 µM | 299 | 328 | KPAPPQGSRPSTVSFNPyEPTGGPWGPDR  | y19: Phospho (+79.97)                             | 99.70% | 3.34 | 20.4 | 12.1 | 3 | 1096.86 | 3,287.55 | 0.05073  |
| 856 | PE | PV | 10 µM | 299 | 328 | KPAPPQGSRPSTVSFNPyEPTGGPWGPDR  | y19: Phospho (+79.97)                             | 99.70% | 3.5  | 25.6 | 11.1 | 4 | 822.90  | 3,287.55 | 0.04858  |
| 857 | PE | PV | 10 µM | 299 | 328 | KPAPPQGSRPSTVSFNPyEPTGGPWGPDR  | y19: Phospho (+79.97)                             | 99.70% | 3.62 | 28.2 | 11.7 | 4 | 822.90  | 3,287.56 | 0.05175  |
| 858 | PE | PV | 10 µM | 299 | 328 | KPAPPQGSRPSTVSFNPyEPTGGPWGPDR  | y19: Phospho (+79.97)                             | 99.70% | 4.03 | 17.8 | 11   | 3 | 1096.86 | 3,287.55 | 0.04817  |
| 859 | PE | PV | 10 µM | 299 | 328 | KPAPPQGSRPSTVSFNPyEPTGGPWGPDR  | y19: Phospho (+79.97)                             | 99.70% | 3.53 | 26.3 | 11   | 4 | 822.90  | 3,287.55 | 0.05004  |
| 860 | PE | PV | 10 µM | 299 | 328 | KPAPPQGSRPSTVSFNPyEPTGGPWGPDR  | y19: Phospho (+79.97)                             | 99.70% | 3.82 | 34.1 | 11.6 | 4 | 822.90  | 3,287.55 | 0.04834  |
| 861 | PE | PV | 10 µM | 299 | 328 | KPAPPQGSRPSTVSFNPyEPTGGPWGPDR  | y19: Phospho (+79.97)                             | 99.70% | 3.39 | 30.4 | 11.2 | 4 | 822.90  | 3,287.55 | 0.04956  |
| 862 | PE | PV | 10 µM | 299 | 328 | KPAPPQGSRPSTVSFNPyEPTGGPWGPDR  | y19: Phospho (+79.97)                             | 99.70% | 3.66 | 32   | 11.6 | 4 | 822.90  | 3,287.56 | 0.05444  |
| 863 | PE | PV | 10 µM | 299 | 328 | KPAPPQGSRPSTVSFNPyEPTGGPWGPDR  | y19: Phospho (+79.97)                             | 99.70% | 3.62 | 26.2 | 11.2 | 4 | 822.89  | 3,287.55 | 0.04419  |
| 864 | PE | PV | 10 µM | 299 | 328 | KPAPPQGSRPSTVSFNPyEPTGGPWGPDR  | y19: Phospho (+79.97)                             | 99.70% | 3.78 | 28.9 | 10.1 | 4 | 822.90  | 3,287.55 | 0.04711  |
| 865 | PE | PV | 10 µM | 299 | 328 | KPAPPQGSRPSTVSFNPyEPTGGPWGPDR  | y19: Phospho (+79.97)                             | 99.70% | 3.66 | 24.2 | 12.6 | 4 | 822.90  | 3,287.55 | 0.04711  |
| 866 | PE | PV | 30 µM | 299 | 328 | KPAPPQGSRPSTVSFNPyEPTGGPWGPDR  | y19: Phospho (+79.97)                             | 99.70% | 3.59 | 17.8 | 7.7  | 4 | 822.89  | 3,287.52 | 0.01977  |
| 867 | PE | PV | 30 µM | 299 | 328 | KPAPPQGSRPSTVSFNPyEPTGGPWGPDR  | y19: Phospho (+79.97)                             | 99.70% | 3.82 | 23.2 | 13   | 3 | 1096.84 | 3,287.51 | 0.00678  |
| 868 | PE | PV | 30 µM | 299 | 328 | KPAPPQGSRPSTVSFNPyEPTGGPWGPDR  | y19: Phospho (+79.97)                             | 99.70% | 4.41 | 37.8 | 7.54 | 4 | 822.88  | 3,287.51 | 0.00537  |
| 869 | PE | PV | 30 µM | 299 | 328 | KPAPPQGSRPSTVSFNPyEPTGGPWGPDR  | y19: Phospho (+79.97)                             | 99.70% | 5.67 | 34.8 | 12.1 | 4 | 822.88  | 3,287.51 | 0.00659  |
| 870 | PE | PV | 30 µM | 299 | 328 | KPAPPQGSRPSTVSFNPyEPTGGPWGPDR  | y19: Phospho (+79.97)                             | 99.70% | 4.91 | 22.3 | 12   | 3 | 1096.85 | 3,287.52 | 0.01594  |
| 871 | PE | PV | 30 µM | 299 | 328 | KPAPPQGSRPSTVSFNPyEPTGGPWGPDR  | y19: Phospho (+79.97)                             | 99.70% | 5.25 | 17   | 6.62 | 4 | 822.89  | 3,287.52 | 0.01489  |
| 872 | PE | PV | 30 µM | 299 | 328 | KPAPPQGSRPSTVSFNPyEPTGGPWGPDR  | y19: Phospho (+79.97)                             | 99.70% | 3.78 | 21.8 | 11.7 | 3 | 1096.85 | 3,287.53 | 0.02143  |
| 873 | PE | PV | 30 µM | 299 | 328 | KPAPPQGSRPSTVSFNPyEPTGGPWGPDR  | y19: Phospho (+79.97)                             | 99.70% | 5.22 | 22.1 | 8.74 | 4 | 822.89  | 3,287.51 | 0.00854  |
| 874 | PE | PV | 30 µM | 299 | 328 | KPAPPQGSRPSTVSFNPyEPTGGPWGPDR  | y19: Phospho (+79.97)                             | 99.70% | 5.43 | 34   | 10.1 | 4 | 822.89  | 3,287.51 | 0.01025  |
| 875 | PE | PV | 30 µM | 299 | 328 | KPAPPQGSRPSTVSFNPyEPTGGPWGPDR  | y19: Phospho (+79.97)                             | 99.70% | 6.75 | 31.5 | 12   | 4 | 822.89  | 3,287.52 | 0.01489  |

|     |    |    |       |     |     |                                |                                                |        |      |      |      |   |         |          |          |
|-----|----|----|-------|-----|-----|--------------------------------|------------------------------------------------|--------|------|------|------|---|---------|----------|----------|
| 876 | PE | PV | 30 µM | 299 | 328 | KPAPPqGSRPESTVSFNPyEPTGGPWGPDR | q6: Deamidated (+0.98), y19: Phospho (+79.97)  | 99.70% | 5.04 | 30.5 | 13.3 | 4 | 823.13  | 3,288.50 | 0.01622  |
| 877 | PE | PV | 30 µM | 299 | 328 | KPAPPQGSRPESTVSFnPyEPTGGPWGPDR | n17: Deamidated (+0.98), y19: Phospho (+79.97) | 99.70% | 3.42 | 16.7 | 4.43 | 3 | 1097.18 | 3,288.52 | 0.02948  |
| 878 | PE | PV | 30 µM | 299 | 328 | KPAPPQGSRPESTVSFnPyEPTGGPWGPDR | n17: Deamidated (+0.98), y19: Phospho (+79.97) | 99.70% | 3.65 | 25.5 | 9.09 | 3 | 1097.18 | 3,288.51 | 0.02399  |
| 879 | PE | PV | 30 µM | 299 | 328 | KPAPPQGSRPESTVSFnPyEPTGGPWGPDR | n17: Deamidated (+0.98), y19: Phospho (+79.97) | 99.70% | 5.11 | 34.8 | 13.3 | 4 | 823.13  | 3,288.51 | 0.01915  |
| 880 | PE | PV | 30 µM | 299 | 328 | KPAPPQGSRPESTVSFNPyEPTGGPWGPDR | y19: Phospho (+79.97)                          | 99.70% | 6.45 | 28.5 | 12.9 | 4 | 822.89  | 3,287.52 | 0.01171  |
| 881 | PE | PV | 30 µM | 299 | 328 | KPAPPqGSRPESTVSFNPyEPTGGPWGPDR | q6: Deamidated (+0.98), y19: Phospho (+79.97)  | 99.70% | 4.56 | 25.6 | 13.1 | 4 | 823.14  | 3,288.51 | 0.02282  |
| 882 | PE | PV | 30 µM | 299 | 328 | KPAPPQGSRPESTVSFNPyEPTGGPWGPDR | y19: Phospho (+79.97)                          | 99.70% | 6.88 | 37.3 | 14.3 | 4 | 822.89  | 3,287.52 | 0.01220  |
| 883 | PE | PV | 30 µM | 299 | 328 | KPAPPQGSRPESTVSFnPyEPTGGPWGPDR | n17: Deamidated (+0.98), y19: Phospho (+79.97) | 99.70% | 3.87 | 22.8 | 6.7  | 3 | 1097.18 | 3,288.51 | 0.01996  |
| 884 | PE | PV | 30 µM | 299 | 328 | KPAPPQGSRPESTVSFNPyEPTGGPWGPDR | y19: Phospho (+79.97)                          | 99.70% | 5.76 | 29.4 | 12.2 | 4 | 822.89  | 3,287.51 | 0.00756  |
| 885 | PE | PV | 30 µM | 299 | 328 | KPAPPQGSRPESTVSFNPyEPTGGPWGPDR | y19: Phospho (+79.97)                          | 99.70% | 4.25 | 15.2 | 11.6 | 3 | 1096.85 | 3,287.52 | 0.01924  |
| 886 | PE | PV | 30 µM | 299 | 328 | KPAPPQGSRPESTVSFNPyEPTGGPWGPDR | y19: Phospho (+79.97)                          | 99.70% | 6.35 | 36.9 | 13.3 | 4 | 822.89  | 3,287.52 | 0.01220  |
| 887 | PE | PV | 30 µM | 299 | 328 | KPAPPqGSRPESTVSFNPyEPTGGPWGPDR | q6: Deamidated (+0.98), y19: Phospho (+79.97)  | 99.70% | 5.2  | 46.8 | 14.4 | 4 | 823.13  | 3,288.51 | 0.01720  |
| 888 | PE | PV | 30 µM | 299 | 328 | KPAPPQGSRPESTVSFNPyEPTGGPWGPDR | y19: Phospho (+79.97)                          | 99.70% | 6.87 | 36.6 | 14.4 | 4 | 822.89  | 3,287.52 | 0.01196  |
| 889 | PE | PV | 30 µM | 299 | 328 | KPAPPQGSRPESTVSFNPyEPTGGPWGPDR | y19: Phospho (+79.97)                          | 99.70% | 6.66 | 31.7 | 14.2 | 4 | 822.89  | 3,287.52 | 0.01123  |
| 890 | PE | PV | 30 µM | 299 | 328 | KPAPPQGSRPESTVSFNPyEPTGGPWGPDR | y19: Phospho (+79.97)                          | 99.70% | 4.72 | 23.5 | 10.2 | 3 | 1096.85 | 3,287.52 | 0.02033  |
| 891 | PE | PV | 30 µM | 299 | 328 | KPAPPQGSRPESTVSFNPyEPTGGPWGPDR | y19: Phospho (+79.97)                          | 99.70% | 4.99 | 22.2 | 11.2 | 3 | 1096.85 | 3,287.52 | 0.01411  |
| 892 | PE | PV | 30 µM | 299 | 328 | KPAPPQGSRPESTVSFNPyEPTGGPWGPDR | y19: Phospho (+79.97)                          | 99.70% | 5.13 | 23.1 | 8.39 | 3 | 1096.85 | 3,287.52 | 0.02033  |
| 893 | PE | PV | 30 µM | 299 | 328 | KPAPPQGSRPESTVSFNPyEPTGGPWGPDR | y19: Phospho (+79.97)                          | 99.70% | 7.73 | 38.3 | 13.1 | 4 | 822.89  | 3,287.52 | 0.01245  |
| 894 | PE | PV | 30 µM | 299 | 328 | KPAPPQGSRPESTVSFNPyEPTGGPWGPDR | y19: Phospho (+79.97)                          | 99.70% | 5.42 | 33.8 | 13.5 | 3 | 1096.85 | 3,287.52 | 0.01521  |
| 895 | PE | PV | 30 µM | 299 | 328 | KPAPPQGSRPESTVSFNPyEPTGGPWGPDR | y19: Phospho (+79.97)                          | 99.70% | 4.99 | 21.6 | 7.22 | 3 | 1096.85 | 3,287.52 | 0.01521  |
| 896 | PE | PV | 30 µM | 299 | 328 | KPAPPQGSRPESTVSFNPyEPTGGPWGPDR | y19: Phospho (+79.97)                          | 99.70% | 3.97 | 24.8 | 0    | 5 | 658.51  | 3,287.50 | -0.00356 |
| 897 | PE | PV | 30 µM | 299 | 328 | KPAPPQGSRPESTVSFNPyEPTGGPWGPDR | y19: Phospho (+79.97)                          | 99.70% | 5.56 | 35.5 | 10.7 | 4 | 822.89  | 3,287.51 | 0.00756  |
| 898 | PE | PV | 30 µM | 299 | 328 | KPAPPQGSRPESTVSFNPyEPTGGPWGPDR | y19: Phospho (+79.97)                          | 99.70% | 5.72 | 33.2 | 10.3 | 4 | 822.88  | 3,287.51 | 0.00415  |
| 899 | PE | PV | 30 µM | 299 | 328 | KPAPPQGSRPESTVSFNPyEPTGGPWGPDR | y19: Phospho (+79.97)                          | 99.70% | 3.6  | 21.5 | 11.6 | 3 | 1096.84 | 3,287.50 | -0.00017 |
| 900 | PE | PV | 30 µM | 299 | 328 | KPAPPqGSRPESTVSFNPyEPTGGPWGPDR | q6: Deamidated (+0.98), y19: Phospho (+79.97)  | 99.70% | 3.45 | 22.5 | 10.9 | 4 | 823.13  | 3,288.49 | 0.00621  |
| 901 | PE | PV | 30 µM | 299 | 328 | KPAPPqGSRPESTVSFNPyEPTGGPWGPDR | q6: Deamidated (+0.98), y19: Phospho (+79.97)  | 99.70% | 4.29 | 17.7 | 7.7  | 3 | 1097.17 | 3,288.47 | -0.01446 |
| 902 | PE | PV | 30 µM | 299 | 328 | KPAPPqGSRPESTVSFNPyEPTGGPWGPDR | q6: Deamidated (+0.98), y19: Phospho (+79.97)  | 99.70% | 3.91 | 24.1 | 12   | 3 | 1097.17 | 3,288.49 | 0.00385  |
| 903 | PE | PV | 30 µM | 299 | 328 | KPAPPqGSRPESTVSFNPyEPTGGPWGPDR | q6: Deamidated (+0.98), y19: Phospho (+79.97)  | 99.70% | 4.64 | 34.7 | 12.9 | 4 | 823.13  | 3,288.50 | 0.00719  |
| 904 | PE | PV | 30 µM | 299 | 328 | KPAPPQGSRPESTVSFNPyEPTGGPWGPDR | y19: Phospho (+79.97)                          | 99.70% | 6.57 | 34.9 | 12.4 | 4 | 822.88  | 3,287.51 | 0.00439  |
| 905 | PE | PV | 30 µM | 299 | 328 | KPAPPqGSRPESTVSFNPyEPTGGPWGPDR | q6: Deamidated (+0.98), y19: Phospho (+79.97)  | 99.70% | 4.91 | 15.2 | 11.9 | 3 | 1097.17 | 3,288.49 | 0.00641  |
| 906 | PE | PV | 30 µM | 299 | 328 | KPAPPQGSRPESTVSFNPyEPTGGPWGPDR | y19: Phospho (+79.97)                          | 99.70% | 5.39 | 33.3 | 13.4 | 4 | 822.88  | 3,287.51 | 0.00097  |
| 907 | PE | PV | 30 µM | 299 | 328 | KPAPPqGSRPESTVSFNPyEPTGGPWGPDR | q6: Deamidated (+0.98), y19: Phospho (+79.97)  | 99.70% | 4.84 | 36.6 | 13.6 | 4 | 823.13  | 3,288.49 | 0.00280  |

|     |    |    |       |     |     |                               |                                                |        |      |      |      |   |         |          |          |
|-----|----|----|-------|-----|-----|-------------------------------|------------------------------------------------|--------|------|------|------|---|---------|----------|----------|
| 908 | PE | PV | 30 µM | 299 | 328 | KPAPPQGSRPSTVSFNPyEPTGGPWGPDR | y19: Phospho (+79.97)                          | 99.70% | 4.95 | 28.1 | 9.57 | 3 | 1096.85 | 3,287.53 | 0.02949  |
| 909 | PE | PV | 30 µM | 299 | 328 | KPAPPqGSRPSTVSFNPyEPTGGPWGPDR | q6: Deamidated (+0.98), y19: Phospho (+79.97)  | 99.70% | 5.61 | 37.6 | 12.3 | 4 | 823.13  | 3,288.50 | 0.01329  |
| 910 | PE | PV | 30 µM | 299 | 328 | KPAPPQGSRPSTVSFNPyEPTGGPWGPDR | y19: Phospho (+79.97)                          | 99.70% | 5.93 | 33.1 | 11.9 | 4 | 822.88  | 3,287.51 | 0.00561  |
| 911 | PE | PV | 30 µM | 299 | 328 | KPAPPQGSRPSTVSFNPyEPTGGPWGPDR | y19: Phospho (+79.97)                          | 99.70% | 5.81 | 22.9 | 10.6 | 3 | 1096.84 | 3,287.51 | 0.00642  |
| 912 | PE | PV | 30 µM | 299 | 328 | KPAPPqGSRPSTVSFNPyEPTGGPWGPDR | q6: Deamidated (+0.98), y19: Phospho (+79.97)  | 99.70% | 6.15 | 38.2 | 12.3 | 4 | 823.13  | 3,288.49 | 0.00377  |
| 913 | PE | PV | 30 µM | 299 | 328 | KPAPPQGSRPSTVSFNPyEPTGGPWGPDR | y19: Phospho (+79.97)                          | 99.70% | 6.5  | 31.4 | 10.6 | 4 | 822.88  | 3,287.50 | -0.00391 |
| 914 | PE | PV | 30 µM | 299 | 328 | KPAPPqGSRPSTVSFNPyEPTGGPWGPDR | q6: Deamidated (+0.98), y19: Phospho (+79.97)  | 99.70% | 5.8  | 38.5 | 14.2 | 4 | 823.13  | 3,288.49 | 0.00255  |
| 915 | PE | PV | 30 µM | 299 | 328 | KPAPPqGSRPSTVSFNPyEPTGGPWGPDR | q6: Deamidated (+0.98), y19: Phospho (+79.97)  | 99.70% | 5.85 | 38.2 | 13.1 | 4 | 823.13  | 3,288.49 | 0.00109  |
| 916 | PE | PV | 30 µM | 299 | 328 | KPAPPQGSRPSTVSFNPyEPTGGPWGPDR | y19: Phospho (+79.97)                          | 99.70% | 5.58 | 30.7 | 10.6 | 3 | 1096.85 | 3,287.53 | 0.02290  |
| 917 | PE | PV | 30 µM | 299 | 328 | KPAPPQGSRPSTVSFNPyEPTGGPWGPDR | y19: Phospho (+79.97)                          | 99.70% | 6.74 | 32   | 11.4 | 3 | 1096.84 | 3,287.51 | 0.00825  |
| 918 | PE | PV | 30 µM | 299 | 328 | KPAPPQGSRPSTVSFNPyEPTGGPWGPDR | y19: Phospho (+79.97)                          | 99.70% | 5.8  | 19.9 | 13.7 | 3 | 1096.85 | 3,287.52 | 0.01301  |
| 919 | PE | PV | 30 µM | 299 | 328 | KPAPPqGSRPSTVSFNPyEPTGGPWGPDR | q6: Deamidated (+0.98), y19: Phospho (+79.97)  | 99.70% | 6.31 | 19.7 | 10.8 | 3 | 1097.17 | 3,288.49 | 0.00568  |
| 920 | PE | PV | 30 µM | 299 | 328 | KPAPPQGSRPSTVSFNPyEPTGGPWGPDR | y19: Phospho (+79.97)                          | 99.70% | 2.56 | 20.3 | 6.34 | 3 | 1096.85 | 3,287.51 | 0.01081  |
| 921 | PE | PV | 30 µM | 299 | 328 | KPAPPQGSRPSTVSFNPyEPTGGPWGPDR | y19: Phospho (+79.97)                          | 99.70% | 3.7  | 28.3 | 14   | 3 | 1096.85 | 3,287.52 | 0.01118  |
| 922 | PE | PV | 30 µM | 299 | 328 | KPAPPQGSRPSTVSFNPyEPTGGPWGPDR | y19: Phospho (+79.97)                          | 99.70% | 4.81 | 35.7 | 15.3 | 4 | 822.89  | 3,287.52 | 0.01342  |
| 923 | PE | PV | 30 µM | 299 | 328 | KPAPPQGSRPSTVSFNPyEPTGGPWGPDR | y19: Phospho (+79.97)                          | 99.70% | 4.27 | 49.1 | 14.6 | 4 | 822.89  | 3,287.51 | 0.01049  |
| 924 | PE | PV | 30 µM | 299 | 328 | KPAPPQGSRPSTVSFNPyEPTGGPWGPDR | s15: Phospho (+79.97)                          | 93.00% | 0    | 0    | 3.02 | 4 | 823.15  | 3,288.57 | 1.06900  |
| 925 | PE | PV | 30 µM | 299 | 328 | KPAPPqGSRPSTVSFNPyEPTGGPWGPDR | q6: Deamidated (+0.98), y19: Phospho (+79.97)  | 99.70% | 0    | 0    | 7.54 | 4 | 823.40  | 3,289.56 | 1.06700  |
| 926 | PE | PV | 30 µM | 299 | 328 | KPAPPQGSRPSTVSFNPyEPTGGPWGPDR | y19: Phospho (+79.97)                          | 99.70% | 3.79 | 12.6 | 4.23 | 4 | 822.90  | 3,287.56 | 0.05273  |
| 927 | PE | PV | 30 µM | 299 | 328 | KPAPPQGSRPSTVSFNPyEPTGGPWGPDR | y19: Phospho (+79.97)                          | 99.70% | 3.84 | 11.1 | 5.05 | 4 | 822.90  | 3,287.56 | 0.05273  |
| 928 | PE | PV | 30 µM | 299 | 328 | KPAPPQGSRPSTVSFNPyEPTGGPWGPDR | y19: Phospho (+79.97)                          | 99.70% | 3.74 | 18   | 6.57 | 4 | 822.90  | 3,287.57 | 0.06176  |
| 929 | PE | PV | 30 µM | 299 | 328 | KPAPPQGSRPSTVSFNPyEPTGGPWGPDR | y19: Phospho (+79.97)                          | 99.70% | 3.49 | 14   | 6.01 | 4 | 822.90  | 3,287.55 | 0.04785  |
| 930 | PE | PV | 30 µM | 299 | 328 | KPAPPQGSRPSTVSFNPyEPTGGPWGPDR | y19: Phospho (+79.97)                          | 99.70% | 3.7  | 14.6 | 6.19 | 4 | 822.90  | 3,287.55 | 0.04760  |
| 931 | PE | PV | 30 µM | 299 | 328 | KPAPPQGSRPSTVSFNPyEPTGGPWGPDR | y19: Phospho (+79.97)                          | 99.70% | 2.64 | 23.5 | 6.37 | 4 | 822.90  | 3,287.56 | 0.05224  |
| 932 | PE | PV | 30 µM | 299 | 328 | KPAPPQGSRPSTVSFNPyEPTGGPWGPDR | y19: Phospho (+79.97)                          | 99.70% | 2.43 | 20   | 6.96 | 3 | 1096.86 | 3,287.56 | 0.05293  |
| 933 | PE | PV | 30 µM | 299 | 328 | KPAPPQGSRPSTVSFNPyEPTGGPWGPDR | s8: Phospho (+79.97)                           | 99.70% | 2.76 | 13.1 | 7.92 | 3 | 1096.86 | 3,287.56 | 0.05805  |
| 934 | PE | PV | 30 µM | 299 | 328 | KPAPPQGSRPSTVSFNPyEPTGGPWGPDR | y19: Phospho (+79.97)                          | 99.70% | 4.25 | 25.9 | 8.66 | 4 | 822.90  | 3,287.57 | 0.06225  |
| 935 | PE | PV | 30 µM | 299 | 328 | KPAPPqGSRPSTVSFNPyEPTGGPWGPDR | q6: Deamidated (+0.98), y19: Phospho (+79.97)  | 99.70% | 3.18 | 16   | 9.04 | 3 | 1097.19 | 3,288.55 | 0.05805  |
| 936 | PE | PV | 30 µM | 299 | 328 | KPAPPQGSRPSTVSFNPyEPTGGPWGPDR | y19: Phospho (+79.97)                          | 99.70% | 3.86 | 26   | 8.89 | 4 | 822.90  | 3,287.57 | 0.06225  |
| 937 | PE | PV | 30 µM | 299 | 328 | KPAPPQGSRPSTVSFNPyEPTGGPWGPDR | y19: Phospho (+79.97)                          | 99.70% | 3.83 | 26   | 9.1  | 4 | 822.90  | 3,287.56 | 0.05835  |
| 938 | PE | PV | 30 µM | 299 | 328 | KPAPPQGSRPSTVSFNPyEPTGGPWGPDR | y19: Phospho (+79.97)                          | 99.70% | 3.85 | 12.3 | 9.16 | 3 | 1096.86 | 3,287.56 | 0.05696  |
| 939 | PE | PV | 30 µM | 299 | 328 | KPAPPQGSRPSTVSFNPyEPTGGPWGPDR | y19: Phospho (+79.97)                          | 99.70% | 3.1  | 16.8 | 9.39 | 4 | 822.90  | 3,287.55 | 0.05053  |
| 940 | PE | PV | 30 µM | 299 | 328 | KPAPPQGSRPSTVSFNPyEPTGGPWGPDR | n17: Deamidated (+0.98), y19: Phospho (+79.97) | 99.70% | 0    | 35.3 | 15   | 4 | 823.15  | 3,288.55 | 0.06505  |
| 941 | PE | PV | 30 µM | 299 | 328 | KPAPPQGSRPSTVSFNPyEPTGGPWGPDR | y19: Phospho (+79.97)                          | 99.70% | 3.37 | 0    | 9.62 | 3 | 1096.86 | 3,287.56 | 0.05329  |
| 942 | PE | PV | 30 µM | 299 | 328 | KPAPPQGSRPSTVSFNPyEPTGGPWGPDR | y19: Phospho (+79.97)                          | 99.70% | 3.65 | 27.4 | 12.3 | 3 | 1096.86 | 3,287.55 | 0.05036  |
| 943 | PE | PV | 30 µM | 299 | 328 | KPAPPQGSRPSTVSFNPyEPTGGPWGPDR | y19: Phospho (+79.97)                          | 99.70% | 3.43 | 29.7 | 10.4 | 4 | 822.89  | 3,287.55 | 0.04272  |
| 944 | PE | PV | 30 µM | 299 | 328 | KPAPPQGSRPSTVSFNPyEPTGGPWGPDR | y19: Phospho (+79.97)                          | 99.70% | 3.22 | 25.2 | 12.6 | 4 | 822.90  | 3,287.55 | 0.04858  |

|     |    |    |        |     |     |                               |                                                |        |      |      |      |   |         |          |          |
|-----|----|----|--------|-----|-----|-------------------------------|------------------------------------------------|--------|------|------|------|---|---------|----------|----------|
| 945 | PE | PV | 30 μM  | 299 | 328 | KPAPPQGSRPSTVSFNPyEPTGGPWGPDR | y19: Phospho (+79.97)                          | 99.70% | 3.72 | 28.2 | 11.6 | 4 | 822.89  | 3,287.55 | 0.04589  |
| 946 | PE | PV | 30 μM  | 299 | 328 | KPAPPQGSRPSTVSFNPyEPTGGPWGPDR | y19: Phospho (+79.97)                          | 99.70% | 3.83 | 22.9 | 11.8 | 4 | 822.89  | 3,287.55 | 0.04589  |
| 947 | PE | PV | 30 μM  | 299 | 328 | KPAPPQGSRPSTVSFNPyEPTGGPWGPDR | y19: Phospho (+79.97)                          | 99.70% | 3.48 | 22   | 11.3 | 3 | 1096.86 | 3,287.55 | 0.04743  |
| 948 | PE | PV | 30 μM  | 299 | 328 | KPAPPQGSRPSTVSFNPyEPTGGPWGPDR | y19: Phospho (+79.97)                          | 99.70% | 4    | 25.2 | 12.4 | 4 | 822.89  | 3,287.55 | 0.04565  |
| 949 | PE | PV | 30 μM  | 299 | 328 | KPAPPQGSRPSTVSFNPyEPTGGPWGPDR | y19: Phospho (+79.97)                          | 99.70% | 3.87 | 25.6 | 11.8 | 4 | 822.90  | 3,287.55 | 0.04760  |
| 950 | PE | PV | 30 μM  | 299 | 328 | KPAPPQGSRPSTVSFNPyEPTGGPWGPDR | y19: Phospho (+79.97)                          | 99.70% | 4.13 | 13.4 | 10.3 | 3 | 1096.86 | 3,287.56 | 0.05403  |
| 951 | PE | PV | 30 μM  | 299 | 328 | KPAPPQGSRPSTVSFNPyEPTGGPWGPDR | y19: Phospho (+79.97)                          | 99.70% | 3.91 | 11.6 | 12.7 | 3 | 1096.86 | 3,287.55 | 0.04853  |
| 952 | PE | PV | 30 μM  | 299 | 328 | KPAPPQGSRPSTVSFNPyEPTGGPWGPDR | y19: Phospho (+79.97)                          | 99.70% | 3.93 | 32.6 | 12.4 | 4 | 822.90  | 3,287.55 | 0.04711  |
| 953 | PE | PV | 30 μM  | 299 | 328 | KPAPPQGSRPSTVSFNPyEPTGGPWGPDR | y19: Phospho (+79.97)                          | 99.70% | 3.87 | 22.1 | 10.2 | 3 | 1096.86 | 3,287.55 | 0.04450  |
| 954 | PE | PV | 30 μM  | 299 | 328 | KPAPPQGSRPSTVSFNPyEPTGGPWGPDR | y19: Phospho (+79.97)                          | 99.70% | 3.63 | 27.3 | 11.7 | 4 | 822.90  | 3,287.55 | 0.04907  |
| 955 | PE | PV | 30 μM  | 299 | 328 | KPAPPQGSRPSTVSFNPyEPTGGPWGPDR | s15: Phospho (+79.97)                          | 99.70% | 4.25 | 13.7 | 10.2 | 3 | 1096.86 | 3,287.55 | 0.04780  |
| 956 | PE | PV | 30 μM  | 299 | 328 | KPAPPQGSRPSTVSFNPyEPTGGPWGPDR | y19: Phospho (+79.97)                          | 99.70% | 4    | 25.8 | 11.9 | 4 | 822.90  | 3,287.55 | 0.04736  |
| 957 | PE | PV | 30 μM  | 299 | 328 | KPAPPQGSRPSTVSFNPyEPTGGPWGPDR | y19: Phospho (+79.97)                          | 99.70% | 4.11 | 26.7 | 11.8 | 4 | 822.90  | 3,287.55 | 0.04785  |
| 958 | PE | PV | 30 μM  | 299 | 328 | KPAPPQGSRPSTVSFNPyEPTGGPWGPDR | y19: Phospho (+79.97)                          | 99.70% | 4.31 | 15.4 | 11.3 | 3 | 1096.86 | 3,287.55 | 0.04743  |
| 959 | PE | PV | 30 μM  | 299 | 328 | KPAPPQGSRPSTVSFNPyEPTGGPWGPDR | y19: Phospho (+79.97)                          | 99.70% | 4.39 | 17.2 | 11.9 | 3 | 1096.86 | 3,287.55 | 0.04780  |
| 960 | PE | PV | 30 μM  | 299 | 328 | KPAPPQGSRPSTVSFNPyEPTGGPWGPDR | y19: Phospho (+79.97)                          | 99.70% | 2.6  | 25.4 | 5.02 | 4 | 822.88  | 3,287.50 | -0.00196 |
| 961 | PE | PV | 100 μM | 299 | 328 | KPAPPQGSRPSTVSFNPyEPTGGPWGPDR | y19: Phospho (+79.97)                          | 99.20% | 2.74 | 30.6 | 0    | 5 | 658.51  | 3,287.52 | 0.01140  |
| 962 | PE | PV | 100 μM | 299 | 328 | KPAPPQGSRPSTVSFNPyEPTGGPWGPDR | y19: Phospho (+79.97)                          | 99.70% | 5.17 | 36.5 | 11.7 | 4 | 822.89  | 3,287.51 | 0.00683  |
| 963 | PE | PV | 100 μM | 299 | 328 | KPAPPQGSRPSTVSFNPyEPTGGPWGPDR | y19: Phospho (+79.97)                          | 99.70% | 4.51 | 39.7 | 11.7 | 4 | 822.88  | 3,287.50 | 0.00024  |
| 964 | PE | PV | 100 μM | 299 | 328 | KPAPPQGSRPSTVSFNPyEPTGGPWGPDR | y19: Phospho (+79.97)                          | 99.70% | 4.65 | 15.9 | 10.7 | 3 | 1096.85 | 3,287.52 | 0.01191  |
| 965 | PE | PV | 100 μM | 299 | 328 | KPAPPQGSRPSTVSFNPyEPTGGPWGPDR | y19: Phospho (+79.97)                          | 99.70% | 4.58 | 16.5 | 12   | 3 | 1096.85 | 3,287.52 | 0.01301  |
| 966 | PE | PV | 100 μM | 299 | 328 | KPAPPQGSRPSTVSFNPyEPTGGPWGPDR | n17: Deamidated (+0.98), y19: Phospho (+79.97) | 99.70% | 2.93 | 19.7 | 4.23 | 3 | 1097.18 | 3,288.51 | 0.01996  |
| 967 | PE | PV | 100 μM | 299 | 328 | KPAPPqGSRPSTVSFNPyEPTGGPWGPDR | q6: Deamidated (+0.98), y19: Phospho (+79.97)  | 99.70% | 2.73 | 31.3 | 7.92 | 3 | 1097.18 | 3,288.51 | 0.02655  |
| 968 | PE | PV | 100 μM | 299 | 328 | KPAPPQGSRPSTVSFNPyEPTGGPWGPDR | y19: Phospho (+79.97)                          | 99.70% | 0    | 0    | 8.51 | 4 | 823.39  | 3,289.52 | 2.01400  |
| 969 | PE | PV | 100 μM | 299 | 328 | KPAPPQGSRPSTVSFNPyEPTGGPWGPDR | y19: Phospho (+79.97)                          | 99.70% | 3.41 | 24.8 | 8.77 | 3 | 1096.85 | 3,287.53 | 0.02107  |
| 970 | PE | PV | 100 μM | 299 | 328 | KPAPPQGSRPSTVSFNPyEPTGGPWGPDR | y19: Phospho (+79.97)                          | 99.70% | 5.79 | 17.2 | 9.82 | 4 | 822.89  | 3,287.51 | 0.00781  |
| 971 | PE | PV | 100 μM | 299 | 328 | KPAPPQGSRPSTVSFNPyEPTGGPWGPDR | y19: Phospho (+79.97)                          | 99.70% | 5.68 | 28   | 11.4 | 4 | 822.89  | 3,287.52 | 0.01538  |
| 972 | PE | PV | 100 μM | 299 | 328 | KPAPPQGSRPSTVSFNPyEPTGGPWGPDR | y19: Phospho (+79.97)                          | 99.70% | 7.02 | 30   | 12   | 4 | 822.89  | 3,287.52 | 0.01269  |
| 973 | PE | PV | 100 μM | 299 | 328 | KPAPPQGSRPSTVSFNPyEPTGGPWGPDR | y19: Phospho (+79.97)                          | 99.70% | 6.91 | 36.8 | 12.9 | 4 | 822.89  | 3,287.52 | 0.01611  |
| 974 | PE | PV | 100 μM | 299 | 328 | KPAPPQGSRPSTVSFNPyEPTGGPWGPDR | y19: Phospho (+79.97)                          | 99.70% | 6.23 | 38.5 | 13.2 | 4 | 822.89  | 3,287.52 | 0.01538  |
| 975 | PE | PV | 100 μM | 299 | 328 | KPAPPQGSRPSTVSFNPyEPTGGPWGPDR | n17: Deamidated (+0.98), y19: Phospho (+79.97) | 99.70% | 3.61 | 21.3 | 9.28 | 4 | 823.14  | 3,288.51 | 0.02575  |
| 976 | PE | PV | 100 μM | 299 | 328 | KPAPPqGSRPSTVSFNPyEPTGGPWGPDR | q6: Deamidated (+0.98), y19: Phospho (+79.97)  | 99.70% | 3.96 | 24   | 10.9 | 3 | 1097.18 | 3,288.50 | 0.01557  |
| 977 | PE | PV | 100 μM | 299 | 328 | KPAPPqGSRPSTVSFNPyEPTGGPWGPDR | q6: Deamidated (+0.98), y19: Phospho (+79.97)  | 99.70% | 5.23 | 40.5 | 11.7 | 4 | 823.13  | 3,288.51 | 0.02233  |
| 978 | PE | PV | 100 μM | 299 | 328 | KPAPPqGSRPSTVSFNPyEPTGGPWGPDR | q6: Deamidated (+0.98), y19: Phospho (+79.97)  | 99.70% | 5.12 | 40.1 | 14.3 | 4 | 823.14  | 3,288.51 | 0.02355  |
| 979 | PE | PV | 100 μM | 299 | 328 | KPAPPQGSRPSTVSFNPyEPTGGPWGPDR | y19: Phospho (+79.97)                          | 99.70% | 4.68 | 10.4 | 7.49 | 3 | 1096.85 | 3,287.53 | 0.02546  |
| 980 | PE | PV | 100 μM | 299 | 328 | KPAPPqGSRPSTVSFNPyEPTGGPWGPDR | q6: Deamidated (+0.98), y19: Phospho (+79.97)  | 99.70% | 5.37 | 38.9 | 11.7 | 4 | 823.14  | 3,288.51 | 0.02404  |
| 981 | PE | PV | 100 μM | 299 | 328 | KPAPPQGSRPSTVSFNPyEPTGGPWGPDR | n17: Deamidated (+0.98), y19: Phospho (+79.97) | 99.70% | 3.86 | 28.3 | 8.35 | 3 | 1097.18 | 3,288.51 | 0.02033  |

|      |    |    |        |     |     |                                |                                                |        |      |      |      |   |         |          |          |
|------|----|----|--------|-----|-----|--------------------------------|------------------------------------------------|--------|------|------|------|---|---------|----------|----------|
| 982  | PE | PV | 100 µM | 299 | 328 | KPAPPqGSRPESTVSFNPyEPTGGPWGPDR | q6: Deamidated (+0.98), y19: Phospho (+79.97)  | 99.70% | 5.06 | 44.4 | 10.7 | 4 | 823.13  | 3,288.50 | 0.01500  |
| 983  | PE | PV | 100 µM | 299 | 328 | KPAPPQGSRPESTVSFNPyEPTGGPWGPDR | y19: Phospho (+79.97)                          | 99.70% | 6.3  | 36.9 | 13   | 4 | 822.89  | 3,287.52 | 0.01391  |
| 984  | PE | PV | 100 µM | 299 | 328 | KPAPPQGSRPESTVSFnPyEPTGGPWGPDR | n17: Deamidated (+0.98), y19: Phospho (+79.97) | 99.70% | 5.36 | 30.6 | 14.8 | 4 | 823.13  | 3,288.50 | 0.01598  |
| 985  | PE | PV | 100 µM | 299 | 328 | KPAPPQGSRPESTVSFNPyEPTGGPWGPDR | y19: Phospho (+79.97)                          | 99.70% | 6.41 | 29.5 | 13.6 | 4 | 822.89  | 3,287.51 | 0.00805  |
| 986  | PE | PV | 100 µM | 299 | 328 | KPAPPQGSRPESTVSFNPyEPTGGPWGPDR | y19: Phospho (+79.97)                          | 99.70% | 4.88 | 16.4 | 12   | 3 | 1096.85 | 3,287.53 | 0.02363  |
| 987  | PE | PV | 100 µM | 299 | 328 | KPAPPQGSRPESTVSFNPyEPTGGPWGPDR | y19: Phospho (+79.97)                          | 99.70% | 5.32 | 31.4 | 16.4 | 3 | 1096.85 | 3,287.52 | 0.01521  |
| 988  | PE | PV | 100 µM | 299 | 328 | KPAPPQGSRPESTVSFNPyEPTGGPWGPDR | y19: Phospho (+79.97)                          | 99.70% | 6.44 | 28.3 | 10.4 | 3 | 1096.85 | 3,287.53 | 0.02107  |
| 989  | PE | PV | 100 µM | 299 | 328 | KPAPPQGSRPESTVSFNPyEPTGGPWGPDR | y19: Phospho (+79.97)                          | 99.70% | 6.28 | 27.2 | 12.3 | 3 | 1096.85 | 3,287.52 | 0.01594  |
| 990  | PE | PV | 100 µM | 299 | 328 | KPAPPQGSRPESTVSFnPyEPTGGPWGPDR | n17: Deamidated (+0.98), y19: Phospho (+79.97) | 99.70% | 2.92 | 0    | 2.54 | 3 | 1097.18 | 3,288.51 | 0.02069  |
| 991  | PE | PV | 100 µM | 299 | 328 | KPAPPQGSRPESTVSFNPyEPTGGPWGPDR | y19: Phospho (+79.97)                          | 99.70% | 2.99 | 17.8 | 0    | 5 | 658.51  | 3,287.50 | -0.00173 |
| 992  | PE | PV | 100 µM | 299 | 328 | KPAPPqGSRPESTVSFNPyEPTGGPWGPDR | q6: Deamidated (+0.98), y19: Phospho (+79.97)  | 99.70% | 2.89 | 13.2 | 6.28 | 3 | 1097.17 | 3,288.50 | 0.00861  |
| 993  | PE | PV | 100 µM | 299 | 328 | KPAPPQGSRPESTVSFNPyEPTGGPWGPDR | y19: Phospho (+79.97)                          | 99.70% | 4.28 | 30.6 | 0    | 5 | 658.51  | 3,287.51 | 0.00285  |
| 994  | PE | PV | 100 µM | 299 | 328 | KPAPPQGSRPESTVSFNPyEPTGGPWGPDR | y19: Phospho (+79.97)                          | 99.70% | 5.48 | 29.5 | 9.52 | 4 | 822.89  | 3,287.51 | 0.00708  |
| 995  | PE | PV | 100 µM | 299 | 328 | KPAPPQGSRPESTVSFNPyEPTGGPWGPDR | y19: Phospho (+79.97)                          | 99.70% | 5.53 | 38.6 | 12.4 | 4 | 822.89  | 3,287.51 | 0.00805  |
| 996  | PE | PV | 100 µM | 299 | 328 | KPAPPQGSRPESTVSFNPyEPTGGPWGPDR | y19: Phospho (+79.97)                          | 99.70% | 6.14 | 30.5 | 12   | 4 | 822.88  | 3,287.51 | 0.00537  |
| 997  | PE | PV | 100 µM | 299 | 328 | KPAPPQGSRPESTVSFNPyEPTGGPWGPDR | y19: Phospho (+79.97)                          | 99.70% | 6.63 | 31.3 | 12.2 | 4 | 822.89  | 3,287.51 | 0.00854  |
| 998  | PE | PV | 100 µM | 299 | 328 | KPAPPQGSRPESTVSFnPyEPTGGPWGPDR | n17: Deamidated (+0.98), y19: Phospho (+79.97) | 99.70% | 4    | 33.8 | 14.6 | 4 | 823.13  | 3,288.51 | 0.02208  |
| 999  | PE | PV | 100 µM | 299 | 328 | KPAPPqGSRPESTVSFNPyEPTGGPWGPDR | q6: Deamidated (+0.98), y19: Phospho (+79.97)  | 99.70% | 5.07 | 38.4 | 14.1 | 4 | 823.13  | 3,288.49 | 0.00328  |
| 1000 | PE | PV | 100 µM | 299 | 328 | KPAPPQGSRPESTVSFnPyEPTGGPWGPDR | n17: Deamidated (+0.98), y19: Phospho (+79.97) | 99.70% | 5.24 | 24.9 | 11.5 | 4 | 823.13  | 3,288.50 | 0.01647  |
| 1001 | PE | PV | 100 µM | 299 | 328 | KPAPPqGSRPESTVSFNPyEPTGGPWGPDR | q6: Deamidated (+0.98), y19: Phospho (+79.97)  | 99.70% | 5.25 | 35.8 | 14.9 | 4 | 823.13  | 3,288.49 | 0.00255  |
| 1002 | PE | PV | 100 µM | 299 | 328 | KPAPPqGSRPESTVSFNPyEPTGGPWGPDR | q6: Deamidated (+0.98), y19: Phospho (+79.97)  | 99.70% | 4.39 | 46.3 | 13.9 | 4 | 823.13  | 3,288.50 | 0.00719  |
| 1003 | PE | PV | 100 µM | 299 | 328 | KPAPPQGSRPESTVSFNPyEPTGGPWGPDR | y19: Phospho (+79.97)                          | 99.70% | 5    | 29.2 | 14.8 | 3 | 1096.84 | 3,287.50 | 0.00019  |
| 1004 | PE | PV | 100 µM | 299 | 328 | KPAPPqGSRPESTVSFNPyEPTGGPWGPDR | q6: Deamidated (+0.98), y19: Phospho (+79.97)  | 99.70% | 5.73 | 36   | 12.1 | 4 | 823.13  | 3,288.49 | 0.00084  |
| 1005 | PE | PV | 100 µM | 299 | 328 | KPAPPQGSRPESTVSFNPyEPTGGPWGPDR | y19: Phospho (+79.97)                          | 99.70% | 4.68 | 27.3 | 8.92 | 3 | 1096.85 | 3,287.53 | 0.02290  |
| 1006 | PE | PV | 100 µM | 299 | 328 | KPAPPqGSRPESTVSFNPyEPTGGPWGPDR | q6: Deamidated (+0.98), y19: Phospho (+79.97)  | 99.70% | 5.06 | 23.4 | 12.9 | 3 | 1097.17 | 3,288.50 | 0.01483  |
| 1007 | PE | PV | 100 µM | 299 | 328 | KPAPPqGSRPESTVSFNPyEPTGGPWGPDR | q6: Deamidated (+0.98), y19: Phospho (+79.97)  | 99.70% | 5.47 | 25.6 | 11.4 | 3 | 1097.18 | 3,288.51 | 0.02216  |
| 1008 | PE | PV | 100 µM | 299 | 328 | KPAPPqGSRPESTVSFNPyEPTGGPWGPDR | q6: Deamidated (+0.98), y19: Phospho (+79.97)  | 99.70% | 5.61 | 29   | 11.3 | 3 | 1097.18 | 3,288.51 | 0.02252  |
| 1009 | PE | PV | 100 µM | 299 | 328 | KPAPPQGSRPESTVSFNPyEPTGGPWGPDR | y19: Phospho (+79.97)                          | 99.70% | 6.27 | 15.4 | 11.6 | 3 | 1096.85 | 3,287.52 | 0.01850  |
| 1010 | PE | PV | 100 µM | 299 | 328 | KPAPPQGSRPESTVSFNPyEPTGGPWGPDR | y19: Phospho (+79.97)                          | 99.70% | 6    | 22.5 | 11.6 | 4 | 822.88  | 3,287.50 | -0.00245 |
| 1011 | PE | PV | 100 µM | 299 | 328 | KPAPPQGSRPESTVSFNPyEPTGGPWGPDR | y19: Phospho (+79.97)                          | 99.70% | 6.25 | 28.8 | 10   | 4 | 822.88  | 3,287.50 | -0.00147 |
| 1012 | PE | PV | 100 µM | 299 | 328 | KPAPPQGSRPESTVSFNPyEPTGGPWGPDR | y19: Phospho (+79.97)                          | 99.70% | 6.1  | 24.4 | 12.8 | 3 | 1096.85 | 3,287.51 | 0.01081  |
| 1013 | PE | PV | 100 µM | 299 | 328 | KPAPPQGSRPESTVSFNPyEPTGGPWGPDR | y19: Phospho (+79.97)                          | 99.70% | 6.81 | 36.7 | 15.1 | 4 | 822.88  | 3,287.51 | 0.00390  |

|      |    |    |        |     |     |                               |                                                |        |      |      |      |   |         |          |          |
|------|----|----|--------|-----|-----|-------------------------------|------------------------------------------------|--------|------|------|------|---|---------|----------|----------|
| 1014 | PE | PV | 100 µM | 299 | 328 | KPAPPQGSRPSTVSFNPyEPTGGPWGPDR | y19: Phospho (+79.97)                          | 99.70% | 5.97 | 19.6 | 16.2 | 3 | 1096.84 | 3,287.51 | 0.00605  |
| 1015 | PE | PV | 100 µM | 299 | 328 | KPAPPQGSRPSTVSFNPyEPTGGPWGPDR | y19: Phospho (+79.97)                          | 99.70% | 6.19 | 25.1 | 12.2 | 3 | 1096.85 | 3,287.53 | 0.02473  |
| 1016 | PE | PV | 100 µM | 299 | 328 | KPAPPQGSRPSTVSFNPyEPTGGPWGPDR | y19: Phospho (+79.97)                          | 99.70% | 6.18 | 28.6 | 12.6 | 3 | 1096.85 | 3,287.53 | 0.02509  |
| 1017 | PE | PV | 100 µM | 299 | 328 | KPAPPqGSRPSTVSFNPyEPTGGPWGPDR | q6: Deamidated (+0.98), y19: Phospho (+79.97)  | 99.70% | 5.85 | 36   | 14.4 | 3 | 1097.18 | 3,288.51 | 0.01703  |
| 1018 | PE | PV | 100 µM | 299 | 328 | KPAPPQGSRPSTVSFNPyEPTGGPWGPDR | y19: Phospho (+79.97)                          | 99.70% | 4.73 | 34.4 | 15.6 | 4 | 822.89  | 3,287.51 | 0.00854  |
| 1019 | PE | PV | 100 µM | 299 | 328 | KPAPPQGSRPSTVSFNPyEPTGGPWGPDR | y19: Phospho (+79.97)                          | 99.70% | 5.34 | 36   | 16.6 | 3 | 1096.85 | 3,287.51 | 0.00935  |
| 1020 | PE | PV | 100 µM | 299 | 328 | KPAPPqGSRPSTVSFNPyEPTGGPWGPDR | q6: Deamidated (+0.98), y19: Phospho (+79.97)  | 98.00% | 0    | 0    | 4.8  | 3 | 1097.53 | 3,289.56 | 1.06900  |
| 1021 | PE | PV | 100 µM | 299 | 328 | KPAPPQGSRPSTVSFNPyEPTGGPWGPDR | y19: Phospho (+79.97)                          | 99.70% | 4.08 | 14   | 6.04 | 4 | 822.89  | 3,287.55 | 0.04589  |
| 1022 | PE | PV | 100 µM | 299 | 328 | KPAPPQGSRPSTVSFNPyEPTGGPWGPDR | y19: Phospho (+79.97)                          | 99.70% | 3.98 | 14.1 | 6.3  | 4 | 822.90  | 3,287.55 | 0.04785  |
| 1023 | PE | PV | 100 µM | 299 | 328 | KPAPPQGSRPSTVSFNPyEPTGGPWGPDR | y19: Phospho (+79.97)                          | 99.70% | 4.31 | 11.7 | 7.74 | 3 | 1096.86 | 3,287.56 | 0.05146  |
| 1024 | PE | PV | 100 µM | 299 | 328 | KPAPPQGSRPSTVSFNPyEPTGGPWGPDR | y19: Phospho (+79.97)                          | 99.70% | 3.38 | 22.1 | 8.57 | 4 | 822.90  | 3,287.56 | 0.05981  |
| 1025 | PE | PV | 100 µM | 299 | 328 | KPAPPQGSRPSTVSFNPyEPTGGPWGPDR | y19: Phospho (+79.97)                          | 99.70% | 3.14 | 10.5 | 8.54 | 3 | 1096.86 | 3,287.56 | 0.05146  |
| 1026 | PE | PV | 100 µM | 299 | 328 | KPAPPQGSRPSTVSFNPyEPTGGPWGPDR | y19: Phospho (+79.97)                          | 99.70% | 4.39 | 25.1 | 8.48 | 3 | 1096.86 | 3,287.56 | 0.05146  |
| 1027 | PE | PV | 100 µM | 299 | 328 | KPAPPQGSRPSTVSFNPyEPTGGPWGPDR | y19: Phospho (+79.97)                          | 99.70% | 4.01 | 22.1 | 9.74 | 4 | 822.90  | 3,287.57 | 0.06372  |
| 1028 | PE | PV | 100 µM | 299 | 328 | KPAPPQGSRPSTVSFNPyEPTGGPWGPDR | y19: Phospho (+79.97)                          | 99.70% | 3.82 | 21.7 | 9.08 | 4 | 822.89  | 3,287.55 | 0.04516  |
| 1029 | PE | PV | 100 µM | 299 | 328 | KPAPPQGSRPSTVSFNPyEPTGGPWGPDR | y19: Phospho (+79.97)                          | 99.70% | 3.71 | 26   | 9.8  | 4 | 822.90  | 3,287.55 | 0.04711  |
| 1030 | PE | PV | 100 µM | 299 | 328 | KPAPPQGSRPSTVSFNPyEPTGGPWGPDR | y19: Phospho (+79.97)                          | 99.70% | 4.2  | 20   | 9.1  | 3 | 1096.86 | 3,287.55 | 0.04487  |
| 1031 | PE | PV | 100 µM | 299 | 328 | KPAPPQGSRPSTVSFNPyEPTGGPWGPDR | y19: Phospho (+79.97)                          | 99.70% | 3.49 | 16.3 | 11.1 | 3 | 1096.86 | 3,287.56 | 0.05732  |
| 1032 | PE | PV | 100 µM | 299 | 328 | KPAPPQGSRPSTVSFNPyEPTGGPWGPDR | y19: Phospho (+79.97)                          | 99.70% | 3.73 | 14.3 | 11.3 | 3 | 1096.86 | 3,287.55 | 0.04304  |
| 1033 | PE | PV | 100 µM | 299 | 328 | KPAPPQGSRPSTVSFNPyEPTGGPWGPDR | s12: Phospho (+79.97), n17: Deamidated (+0.98) | 99.70% | 3.42 | 16.8 | 12.3 | 3 | 1097.19 | 3,288.54 | 0.05255  |
| 1034 | PE | PV | 100 µM | 299 | 328 | KPAPPQGSRPSTVSFNPyEPTGGPWGPDR | y19: Phospho (+79.97)                          | 99.70% | 3.59 | 17.3 | 12.5 | 3 | 1096.86 | 3,287.54 | 0.04084  |
| 1035 | PE | PV | 100 µM | 299 | 328 | KPAPPQGSRPSTVSFNPyEPTGGPWGPDR | y19: Phospho (+79.97)                          | 99.70% | 4.02 | 33.4 | 14   | 4 | 822.89  | 3,287.55 | 0.04296  |
| 1036 | PE | PV | 100 µM | 299 | 328 | KPAPPQGSRPSTVSFNPyEPTGGPWGPDR | y19: Phospho (+79.97)                          | 99.70% | 3.57 | 22.3 | 10.7 | 4 | 822.89  | 3,287.55 | 0.04174  |
| 1037 | PE | PV | 100 µM | 299 | 328 | KPAPPQGSRPSTVSFNPyEPTGGPWGPDR | y19: Phospho (+79.97)                          | 99.70% | 4.36 | 30.1 | 13.6 | 4 | 822.90  | 3,287.55 | 0.04711  |
| 1038 | PE | PV | 100 µM | 299 | 328 | KPAPPQGSRPSTVSFNPyEPTGGPWGPDR | y19: Phospho (+79.97)                          | 99.70% | 3.6  | 15.3 | 11   | 3 | 1096.86 | 3,287.55 | 0.04487  |
| 1039 | PE | PV | 100 µM | 299 | 328 | KPAPPQGSRPSTVSFNPyEPTGGPWGPDR | y19: Phospho (+79.97)                          | 99.70% | 4.02 | 26.9 | 13   | 4 | 822.89  | 3,287.55 | 0.04272  |
| 1040 | PE | PV | 100 µM | 299 | 328 | KPAPPQGSRPSTVSFNPyEPTGGPWGPDR | y19: Phospho (+79.97)                          | 99.70% | 3.88 | 24.8 | 12.4 | 4 | 822.89  | 3,287.55 | 0.04370  |
| 1041 | PE | PV | 100 µM | 299 | 328 | KPAPPQGSRPSTVSFNPyEPTGGPWGPDR | y19: Phospho (+79.97)                          | 99.70% | 3.82 | 18.9 | 12.9 | 3 | 1096.86 | 3,287.55 | 0.04597  |
| 1042 | PE | PV | 100 µM | 299 | 328 | KPAPPQGSRPSTVSFNPyEPTGGPWGPDR | y19: Phospho (+79.97)                          | 99.70% | 3.59 | 18.7 | 9.8  | 3 | 1096.86 | 3,287.55 | 0.04341  |
| 1043 | PE | PV | 100 µM | 299 | 328 | KPAPPQGSRPSTVSFNPyEPTGGPWGPDR | y19: Phospho (+79.97)                          | 99.70% | 4.15 | 23.1 | 11.6 | 3 | 1096.86 | 3,287.55 | 0.04890  |
| 1044 | PE | PV | 100 µM | 299 | 328 | KPAPPQGSRPSTVSFNPyEPTGGPWGPDR | y19: Phospho (+79.97)                          | 99.70% | 3.95 | 36   | 12   | 4 | 822.89  | 3,287.55 | 0.04345  |
| 1045 | PE | PV | 100 µM | 299 | 328 | KPAPPQGSRPSTVSFNPyEPTGGPWGPDR | y19: Phospho (+79.97)                          | 99.70% | 3.97 | 24.1 | 11.8 | 4 | 822.89  | 3,287.55 | 0.04565  |
| 1046 | PE | PV | 100 µM | 299 | 328 | KPAPPQGSRPSTVSFNPyEPTGGPWGPDR | y19: Phospho (+79.97)                          | 99.70% | 3.88 | 29.8 | 12.2 | 4 | 822.89  | 3,287.55 | 0.04126  |
| 1047 | PE | PV | 100 µM | 299 | 328 | KPAPPQGSRPSTVSFNPyEPTGGPWGPDR | y19: Phospho (+79.97)                          | 99.70% | 4.07 | 25.5 | 11.7 | 4 | 822.89  | 3,287.55 | 0.04199  |
| 1048 | PE | PV | 100 µM | 299 | 328 | KPAPPQGSRPSTVSFNPyEPTGGPWGPDR | y19: Phospho (+79.97)                          | 99.70% | 4.12 | 29   | 12.7 | 4 | 822.89  | 3,287.55 | 0.04223  |
| 1049 | PE | PV | 100 µM | 299 | 328 | KPAPPQGSRPSTVSFNPyEPTGGPWGPDR | y19: Phospho (+79.97)                          | 99.70% | 4.07 | 19   | 10.1 | 3 | 1096.86 | 3,287.54 | 0.03938  |
| 1050 | PE | PV | 100 µM | 299 | 328 | KPAPPQGSRPSTVSFNPyEPTGGPWGPDR | y19: Phospho (+79.97)                          | 99.70% | 3.91 | 25   | 13.5 | 4 | 822.89  | 3,287.54 | 0.04052  |
| 1051 | PE | PV | 100 µM | 299 | 328 | KPAPPQGSRPSTVSFNPyEPTGGPWGPDR | y19: Phospho (+79.97)                          | 99.70% | 4.31 | 17.2 | 12.1 | 3 | 1096.86 | 3,287.55 | 0.04377  |
| 1052 | PE | PV | 100 µM | 299 | 328 | KPAPPqGsRPSTVSFNPyEPTGGPWGPDR | q6: Deamidated (+0.98), s8: Phospho (+79.97)   | 99.50% | 1.15 | 10.1 | 1.55 | 4 | 823.14  | 3,288.51 | 0.02526  |
| 1053 | PE | PV | 100 µM | 299 | 328 | KPAPPQGSRPSTVSFNPyEPTGGPWGPDR | y19: Phospho (+79.97)                          | 99.70% | 1.35 | 16   | 0.96 | 3 | 1096.84 | 3,287.50 | -0.00457 |
| 1054 | PE | PV | 100 µM | 299 | 328 | KPAPPQGSRPSTVSFNPyEPTGGPWGPDR | y19: Phospho (+79.97)                          | 99.70% | 2.14 | 0    | 2.85 | 4 | 822.88  | 3,287.49 | -0.01246 |

|      |    |    |        |     |     |                                    |                                                                        |        |      |      |      |   |        |          |          |
|------|----|----|--------|-----|-----|------------------------------------|------------------------------------------------------------------------|--------|------|------|------|---|--------|----------|----------|
| 1055 | PE | PV | 100 µM | 299 | 328 | KPAPPQGSRPSTVSFNPyEPTGGPWGPDR      | y19: Phospho (+79.97)                                                  | 99.70% | 4.27 | 24.5 | 6.42 | 4 | 822.89 | 3,287.51 | 0.00708  |
| 1056 | PE | PV | 100 µM | 299 | 328 | KPAPPQGSRPSTVSFNPyEPTGGPWGPDR      | y19: Phospho (+79.97)                                                  | 99.70% | 4.42 | 21.1 | 8.82 | 4 | 822.88 | 3,287.50 | 0.00048  |
| 1057 | IP | NT | 0      | 299 | 332 | KPAPPQGSRPSTVSFNPyEPTGGPWGPDRGLQR  | y19: Phospho (+79.97)                                                  | 99.70% | 5.55 | 40.2 | 3.36 | 4 | 936.45 | 3,741.77 | 0.00105  |
| 1058 | IP | NT | 0      | 299 | 332 | KPAPPQGSRPSTVSFNPyEPTGGPWGPDRGLQR  | y19: Phospho (+79.97)                                                  | 99.70% | 5.06 | 21.6 | 2.48 | 4 | 936.45 | 3,741.77 | 0.00520  |
| 1059 | IP | NT | 0      | 299 | 332 | KPAPPQGSRPSTVSFNPyEPTGGPWGPDRGLQR  | n17: Deamidated (+0.98), y19: Phospho (+79.97)                         | 99.70% | 5.96 | 41.2 | 2.62 | 4 | 936.70 | 3,742.77 | 0.01826  |
| 1060 | IP | NT | 0      | 299 | 332 | KPAPPQGSRPSTVSFNPyEPTGGPWGPDRGLQR  | y19: Phospho (+79.97)                                                  | 99.70% | 5.02 | 24.7 | 3.57 | 4 | 936.45 | 3,741.77 | 0.00350  |
| 1061 | IP | Hg | 50 µM  | 299 | 332 | KPAPPQGSRPSTVSFNPyEPTGGPWGPDRGLQR  | y19: Phospho (+79.97)                                                  | 98.70% | 3.58 | 17.4 | 1.92 | 4 | 936.45 | 3,741.79 | 0.01692  |
| 1062 | IP | Hg | 50 µM  | 299 | 332 | KPAPPQGSRPSTVSFNPyEPTGGPWGPDRGLQR  | y19: Phospho (+79.97), q33: Deamidated (+0.98)                         | 99.60% | 0    | 0    | 2.57 | 4 | 937.20 | 3,744.78 | 2.02600  |
| 1063 | IP | Hg | 50 µM  | 299 | 332 | KPAPPQGSRPSTVSFNPyEPTGGPWGPDRGLQR  | y19: Phospho (+79.97)                                                  | 99.70% | 4.49 | 15.5 | 4.21 | 4 | 936.45 | 3,741.78 | 0.00569  |
| 1064 | IP | Hg | 50 µM  | 299 | 332 | KPAPPQGSRPSTVSFNPyEPTGGPWGPDRGLQR  | y19: Phospho (+79.97)                                                  | 99.70% | 5.44 | 33   | 2.41 | 4 | 936.45 | 3,741.77 | 0.00179  |
| 1065 | IP | Hg | 50 µM  | 299 | 332 | KPAPPQGSRPSTVSFNPyEPTGGPWGPDRGLQR  | y19: Phospho (+79.97)                                                  | 99.70% | 5.25 | 28.9 | 3.08 | 4 | 936.45 | 3,741.78 | 0.00765  |
| 1066 | IP | Hg | 50 µM  | 299 | 332 | KPAPPQGSRPSTVSFNPyEPTGGPWGPDRGLQR  | y19: Phospho (+79.97)                                                  | 99.70% | 4.94 | 26.6 | 2.89 | 4 | 936.45 | 3,741.77 | 0.00276  |
| 1067 | IP | PV | 0      | 299 | 332 | KPAPPQGSRPSTVSFNPyEPTGGPWGPDRGLQR  | t22: Phospho (+79.97)                                                  | 99.20% | 5.57 | 28.6 | 1.85 | 4 | 936.45 | 3,741.77 | 0.00374  |
| 1068 | IP | PV | 0      | 299 | 332 | KPAPPQGSRPSTVSFNPyEPTGGPWGPDRGLQR  | y19: Phospho (+79.97)                                                  | 99.60% | 4.75 | 21.7 | 1.96 | 4 | 936.45 | 3,741.78 | 0.00569  |
| 1069 | IP | PV | 0      | 299 | 332 | KPAPPqGSRPESTVSFNPyEPTGGPWGPDRGLQR | q6: Deamidated (+0.98), n17: Deamidated (+0.98), y19: Phospho (+79.97) | 99.70% | 4.48 | 37   | 2.01 | 4 | 936.95 | 3,743.77 | 0.02985  |
| 1070 | IP | PV | 0      | 299 | 332 | KPAPPQGSRPSTVSFNPyEPTGGPWGPDRGLQR  | y19: Phospho (+79.97)                                                  | 99.70% | 5.6  | 26.2 | 3.31 | 4 | 936.45 | 3,741.77 | 0.00301  |
| 1071 | PE | Ig | 2 min  | 299 | 332 | KPAPPQGSRPSTVSFNPyEPTGGPWGPDRGLQR  | y19: Phospho (+79.97)                                                  | 99.60% | 3.84 | 11.6 | 2.28 | 4 | 936.45 | 3,741.76 | -0.00920 |
| 1072 | PE | Ig | 2 min  | 299 | 332 | KPAPPQGSRPSTVSFNPyEPTGGPWGPDRGLQR  | y19: Phospho (+79.97)                                                  | 99.70% | 3.91 | 30.4 | 3.01 | 4 | 936.45 | 3,741.76 | -0.01164 |
| 1073 | IP | PV | 0      | 333 | 355 | EALPmDTEVYESPyADPEEIRPK            | m5: Oxidation (+15.99), y14: Phospho (+79.97)                          | 99.00% | 3.82 | 45.7 | 3.52 | 3 | 925.74 | 2,774.21 | 0.00578  |
| 1074 | IP | PV | 0      | 333 | 355 | EALPmDTEVYESPyADPEEIRPK            | m5: Oxidation (+15.99), y10: Phospho (+79.97)                          | 99.30% | 3.81 | 25.6 | 1.85 | 3 | 925.74 | 2,774.21 | 0.00395  |
| 1075 | IP | PV | 0      | 333 | 355 | EALPmDTEVYESPyADPEEIRPK            | m5: Oxidation (+15.99), y14: Phospho (+79.97)                          | 99.70% | 3.93 | 36.9 | 3.72 | 3 | 925.74 | 2,774.21 | 0.00193  |
| 1076 | IP | PV | 0      | 333 | 355 | EALPmDTEVYESPyADPEEIRPK            | m5: Oxidation (+15.99), y14: Phospho (+79.97)                          | 99.70% | 0    | 0    | 4.74 | 3 | 926.08 | 2,775.21 | 1.01000  |
| 1077 | IP | PV | 0      | 333 | 355 | EALPmDTEVYESPyADPEEIRPK            | m5: Oxidation (+15.99), y14: Phospho (+79.97)                          | 99.70% | 3.32 | 7.43 | 5.25 | 3 | 925.74 | 2,774.21 | 0.00358  |
| 1078 | IP | PV | 0      | 333 | 355 | EALPmDTEVYESPyADPEEIRPK            | m5: Oxidation (+15.99), y10: Phospho (+79.97)                          | 99.70% | 4.01 | 9.85 | 4.15 | 3 | 925.74 | 2,774.21 | 0.00230  |
| 1079 | IP | PV | 0      | 333 | 355 | EALPmDTEVYESPyADPEEIRPK            | m5: Oxidation (+15.99), y10: Phospho (+79.97)                          | 99.70% | 4.27 | 37.8 | 5.1  | 3 | 925.74 | 2,774.21 | 0.00431  |
| 1080 | PE | Ig | NT     | 333 | 355 | EALPMDTEVYESPyADPEEIRPK            | y14: Phospho (+79.97)                                                  | 99.70% | 2.6  | 37.5 | 11.5 | 3 | 920.43 | 2,758.26 | 0.05074  |
| 1081 | PE | Ig | 1 min  | 333 | 355 | EALPMDTEVYESPyADPEEIRPK            | y14: Phospho (+79.97)                                                  | 97.40% | 0.49 | 12.3 | 0    | 3 | 920.41 | 2,758.22 | 0.01101  |
| 1082 | PE | Ig | 1 min  | 333 | 355 | EALPMDTEVYESPyADPEEIRPK            | y14: Phospho (+79.97)                                                  | 99.70% | 2.81 | 36.8 | 9    | 3 | 920.43 | 2,758.25 | 0.04561  |
| 1083 | PE | Ig | 1 min  | 333 | 355 | EALPMDTEVYESPyADPEEIRPK            | y14: Phospho (+79.97)                                                  | 99.70% | 2.61 | 26.7 | 9.82 | 3 | 920.43 | 2,758.26 | 0.05001  |
| 1084 | PE | Ig | 1 min  | 333 | 355 | EALPMDTEVYESPyADPEEIRPK            | y14: Phospho (+79.97)                                                  | 99.70% | 3.41 | 43.1 | 13.3 | 3 | 920.42 | 2,758.25 | 0.04177  |
| 1085 | PE | Ig | 2 min  | 333 | 355 | EALPMDTEVYESPyADPEEIRPK            | y14: Phospho (+79.97)                                                  | 99.70% | 2.28 | 20.2 | 5.21 | 3 | 920.42 | 2,758.23 | 0.02456  |
| 1086 | PE | Ig | 2 min  | 333 | 355 | EALPmDTEVYESPyADPEEIRPK            | m5: Oxidation (+15.99), y14: Phospho (+79.97)                          | 99.70% | 1.53 | 17.2 | 0    | 3 | 925.75 | 2,774.22 | 0.01402  |
| 1087 | PE | Ig | 2 min  | 333 | 355 | EALPMDTEVYESPyADPEEIRPK            | y14: Phospho (+79.97)                                                  | 99.70% | 2.58 | 47.7 | 0    | 3 | 920.41 | 2,758.22 | 0.00973  |



|      |    |    |        |     |     |                         |                                               |        |      |      |      |   |         |          |          |
|------|----|----|--------|-----|-----|-------------------------|-----------------------------------------------|--------|------|------|------|---|---------|----------|----------|
| 1088 | PE | Ig | 2 min  | 333 | 355 | EALPMDTEVYESPADPEEIRPK  | y10: Phospho (+79.97)                         | 99.70% | 1.78 | 30   | 0    | 3 | 920.41  | 2,758.21 | 0.00606  |
| 1089 | PE | Ig | 2 min  | 333 | 355 | EALPMDTEVYESPyADPEEIRPK | y14: Phospho (+79.97)                         | 99.70% | 2.57 | 39.4 | 9.02 | 3 | 920.43  | 2,758.25 | 0.04525  |
| 1090 | PE | Ig | 2 min  | 333 | 355 | EALPMDTEVYESPyADPEEIRPK | y14: Phospho (+79.97)                         | 99.70% | 3.02 | 37.5 | 9.7  | 3 | 920.43  | 2,758.26 | 0.04873  |
| 1091 | PE | Ig | 3 min  | 333 | 355 | EALPMDTEVYESPADPEEIRPK  | y10: Phospho (+79.97)                         | 99.50% | 0.74 | 12   | 0    | 3 | 920.41  | 2,758.22 | 0.00918  |
| 1092 | PE | Ig | 3 min  | 333 | 355 | EALPmDTEVYESPyADPEEIRPK | m5: Oxidation (+15.99), y14: Phospho (+79.97) | 99.70% | 1.75 | 29.2 | 0    | 3 | 925.74  | 2,774.21 | 0.00779  |
| 1093 | PE | Ig | 3 min  | 333 | 355 | EALPMDTEVYESPyADPEEIRPK | y14: Phospho (+79.97)                         | 99.70% | 0    | 0    | 8.66 | 3 | 921.09  | 2,760.25 | 2.04000  |
| 1094 | PE | Ig | 3 min  | 333 | 355 | EALPMDTEVYESPyADPEEIRPK | y14: Phospho (+79.97)                         | 99.70% | 2.74 | 19.1 | 10.2 | 3 | 920.42  | 2,758.24 | 0.03206  |
| 1095 | PE | Ig | 3 min  | 333 | 355 | EALPMDTEVYESPyADPEEIRPK | y14: Phospho (+79.97)                         | 99.70% | 3.06 | 16.1 | 12.7 | 3 | 920.42  | 2,758.24 | 0.03316  |
| 1096 | PE | Ig | 5 min  | 333 | 355 | EALPMDTEVYESPyADPEEIRPK | y14: Phospho (+79.97)                         | 99.70% | 2.87 | 21.9 | 8.24 | 3 | 920.41  | 2,758.21 | 0.00075  |
| 1097 | PE | Ig | 5 min  | 333 | 355 | EALPMDTEVYESPyADPEEIRPK | s12: Phospho (+79.97)                         | 86.30% | 0.67 | 0    | 0    | 3 | 920.41  | 2,758.22 | 0.00844  |
| 1098 | PE | Ig | 5 min  | 333 | 355 | EALPMDtEVYESPyADPEEIRPK | t7: Phospho (+79.97)                          | 99.70% | 0.38 | 21.1 | 0    | 2 | 1380.12 | 2,758.22 | 0.00956  |
| 1099 | PE | Ig | 5 min  | 333 | 355 | EALPmDTEVYESPyADPEEIRPK | m5: Oxidation (+15.99), s12: Phospho (+79.97) | 99.70% | 1.24 | 37.4 | 0    | 3 | 925.75  | 2,774.21 | 0.01072  |
| 1100 | PE | Ig | 5 min  | 333 | 355 | EALPMDTEVYESPyADPEEIRPK | y14: Phospho (+79.97)                         | 99.70% | 2.4  | 37.5 | 0    | 3 | 920.42  | 2,758.23 | 0.01650  |
| 1101 | PE | Ig | 5 min  | 333 | 355 | EALPMDTEVYESPADPEEIRPK  | y10: Phospho (+79.97)                         | 99.70% | 2.54 | 57.9 | 0    | 3 | 920.41  | 2,758.21 | 0.00533  |
| 1102 | PE | Ig | 5 min  | 333 | 355 | EALPmDTEVYESPyADPEEIRPK | m5: Oxidation (+15.99), y14: Phospho (+79.97) | 99.70% | 2.87 | 42.3 | 0    | 3 | 925.74  | 2,774.21 | 0.00541  |
| 1103 | PE | Ig | 15 min | 333 | 355 | EALPMDTEVYESPyADPEEIRPK | y14: Phospho (+79.97)                         | 99.10% | 1.18 | 17.6 | 0    | 3 | 920.41  | 2,758.22 | 0.01064  |
| 1104 | PE | Ig | 15 min | 333 | 355 | EALPmDTEVYESPyADPEEIRPK | m5: Oxidation (+15.99), y14: Phospho (+79.97) | 99.70% | 2.4  | 51   | 0    | 3 | 925.74  | 2,774.21 | 0.00541  |
| 1105 | PE | Ig | 15 min | 333 | 355 | EALPMDTEVYESPyADPEEIRPK | y14: Phospho (+79.97)                         | 99.70% | 2.8  | 17.7 | 8.28 | 3 | 920.43  | 2,758.26 | 0.04799  |
| 1106 | PE | Hg | 0      | 333 | 355 | EALPmDTEVYESPyADPEEIRPK | m5: Oxidation (+15.99), y14: Phospho (+79.97) | 98.40% | 2.68 | 0    | 0.7  | 3 | 925.74  | 2,774.21 | 0.00816  |
| 1107 | PE | Hg | 0      | 333 | 355 | EALPMDTEVYESPyADPEEIRPK | y14: Phospho (+79.97)                         | 99.70% | 0    | 40.4 | 3    | 3 | 920.41  | 2,758.21 | 0.00149  |
| 1108 | PE | Hg | 0      | 333 | 355 | EALPMDTEVYESPADPEEIRPK  | y10: Phospho (+79.97)                         | 99.70% | 1.07 | 16.5 | 2.22 | 3 | 920.41  | 2,758.21 | 0.00295  |
| 1109 | PE | Hg | 0      | 333 | 355 | EALPmDTEVYESPyADPEEIRPK | m5: Oxidation (+15.99), y14: Phospho (+79.97) | 99.70% | 1.4  | 12.8 | 4.96 | 3 | 925.75  | 2,774.22 | 0.01402  |
| 1110 | PE | Hg | 0      | 333 | 355 | EALPmDTEVYESPyADPEEIRPK | m5: Oxidation (+15.99), y14: Phospho (+79.97) | 99.70% | 1.58 | 17   | 4.89 | 3 | 925.74  | 2,774.21 | 0.00889  |
| 1111 | PE | Hg | 0      | 333 | 355 | EALPMDTEVYESPyADPEEIRPK | y14: Phospho (+79.97)                         | 99.70% | 0    | 19.6 | 5.92 | 3 | 920.42  | 2,758.23 | 0.01742  |
| 1112 | PE | Hg | 1 µM   | 333 | 355 | EALPmDTEVYESPyADPEEIRPK | m5: Oxidation (+15.99), y14: Phospho (+79.97) | 99.00% | 0.99 | 11.1 | 0    | 3 | 925.74  | 2,774.20 | -0.00851 |
| 1113 | PE | Hg | 1 µM   | 333 | 355 | EALPMDTEVYESPyADPEEIRPK | y14: Phospho (+79.97)                         | 99.60% | 1.99 | 11.7 | 2.34 | 3 | 920.43  | 2,758.26 | 0.04799  |
| 1114 | PE | Hg | 1 µM   | 333 | 355 | EALPMDTEVYESPyADPEEIRPK | y14: Phospho (+79.97)                         | 99.70% | 2.53 | 29.5 | 7.74 | 3 | 920.42  | 2,758.24 | 0.03609  |
| 1115 | PE | Hg | 5 µM   | 333 | 355 | EALPmDTEVYESPyADPEEIRPK | m5: Oxidation (+15.99), y14: Phospho (+79.97) | 88.80% | 0.65 | 0    | 0.85 | 3 | 925.74  | 2,774.21 | 0.00834  |
| 1116 | PE | Hg | 10 µM  | 333 | 355 | EALPmDTEVYESPyADPEEIRPK | m5: Oxidation (+15.99), s12: Phospho (+79.97) | 99.70% | 1.09 | 0    | 2.35 | 3 | 925.74  | 2,774.21 | 0.00688  |
| 1117 | PE | Hg | 10 µM  | 333 | 355 | EALPmDTEVYESPyADPEEIRPK | m5: Oxidation (+15.99), y14: Phospho (+79.97) | 99.70% | 1.44 | 26.5 | 5.44 | 3 | 925.74  | 2,774.20 | -0.00118 |
| 1118 | PE | Hg | 10 µM  | 333 | 355 | EALPmDTEVYESPyADPEEIRPK | m5: Oxidation (+15.99), y14: Phospho (+79.97) | 99.70% | 0    | 19.9 | 1.33 | 3 | 925.75  | 2,774.22 | 0.01383  |
| 1119 | PE | Hg | 20 µM  | 333 | 355 | EALPMDTEVYESPADPEEIRPK  | y10: Phospho (+79.97)                         | 96.10% | 0.74 | 0    | 0    | 3 | 920.41  | 2,758.20 | -0.00694 |
| 1120 | PE | Hg | 20 µM  | 333 | 355 | EALPMDTEVYESPyADPEEIRPK | y14: Phospho (+79.97)                         | 99.70% | 1.31 | 0    | 2.19 | 3 | 920.41  | 2,758.22 | 0.00808  |

|      |    |    |        |     |     |                                      |                                                                            |        |      |      |      |   |         |          |          |
|------|----|----|--------|-----|-----|--------------------------------------|----------------------------------------------------------------------------|--------|------|------|------|---|---------|----------|----------|
| 1121 | PE | Hg | 20 µM  | 333 | 355 | EALPmDTEVYESPyADPEEIRPK              | m5: Oxidation (+15.99), y14: Phospho (+79.97)                              | 99.70% | 1.22 | 10.3 | 3.18 | 3 | 925.75  | 2,774.21 | 0.01109  |
| 1122 | PE | Hg | 50 µM  | 333 | 355 | EALPMDTEVYESPyADPEEIRPK              | y14: Phospho (+79.97)                                                      | 99.70% | 2.76 | 33.9 | 8.07 | 3 | 920.42  | 2,758.23 | 0.01815  |
| 1123 | PE | Hg | 50 µM  | 333 | 355 | EALPMDTEVYESPyADPEEIRPK              | y14: Phospho (+79.97)                                                      | 99.70% | 3.37 | 34.2 | 9.3  | 3 | 920.41  | 2,758.22 | 0.01430  |
| 1124 | PE | Hg | 50 µM  | 333 | 355 | EALPmDTEVYESPyADPEEIRPK              | m5: Oxidation (+15.99), y14: Phospho (+79.97)                              | 99.70% | 1.43 | 11.3 | 2.28 | 4 | 694.56  | 2,774.19 | -0.01041 |
| 1125 | PE | Hg | 50 µM  | 333 | 355 | EALPmDTEVYESPyADPEEIRPK              | m5: Oxidation (+15.99), y14: Phospho (+79.97)                              | 99.70% | 1.43 | 21.3 | 3.15 | 3 | 925.74  | 2,774.20 | -0.00100 |
| 1126 | PE | Hg | 50 µM  | 333 | 355 | EALPmDTEVYESPyADPEEIRPK              | m5: Oxidation (+15.99), y14: Phospho (+79.97)                              | 99.70% | 2.47 | 39.5 | 9.49 | 3 | 925.74  | 2,774.20 | -0.00136 |
| 1127 | PE | Hg | 50 µM  | 333 | 355 | EALPMDTEVYESPyADPEEIRPK              | y14: Phospho (+79.97)                                                      | 99.70% | 2.62 | 46.2 | 8.29 | 3 | 920.41  | 2,758.20 | -0.00584 |
| 1128 | PE | Hg | 50 µM  | 333 | 355 | EALPmDTEVYESPyADPEEIRPK              | m5: Oxidation (+15.99), y14: Phospho (+79.97)                              | 99.70% | 1.16 | 10.9 | 2.96 | 3 | 925.74  | 2,774.21 | 0.00834  |
| 1129 | PE | Hg | 50 µM  | 333 | 355 | EALPMDTEVYESPyADPEEIRPK              | y14: Phospho (+79.97)                                                      | 99.70% | 2.17 | 49.9 | 5.35 | 3 | 920.41  | 2,758.22 | 0.00918  |
| 1130 | PE | Hg | 50 µM  | 333 | 355 | EALPMDtEVYESPyADPEEIRPK              | t7: Phospho (+79.97), y14: Phospho (+79.97)                                | 99.70% | 0    | 0    | 8.55 | 3 | 947.75  | 2,840.22 | 2.04100  |
| 1131 | PE | Hg | 50 µM  | 333 | 355 | eALPmDTEVYESPyADPEEIRPK              | n-term: Dehydrated (-18.01), m5: Oxidation (+15.99), y14: Phospho (+79.97) | 99.70% | 0    | 0    | 10.3 | 3 | 920.09  | 2,757.25 | 1.05200  |
| 1132 | PE | Hg | 50 µM  | 333 | 355 | EALPMDTEVYESPyADPEEIRPK              | y14: Phospho (+79.97)                                                      | 99.70% | 2.79 | 21.9 | 8.14 | 3 | 920.43  | 2,758.26 | 0.05038  |
| 1133 | PE | Hg | 50 µM  | 333 | 355 | EALPMDTEVYESPyADPEEIRPK              | y14: Phospho (+79.97)                                                      | 99.70% | 2.91 | 38.7 | 9.89 | 3 | 920.43  | 2,758.26 | 0.04726  |
| 1134 | PE | Hg | 50 µM  | 333 | 355 | EALPMDTEVYESPyADPEEIRPK              | y14: Phospho (+79.97)                                                      | 99.70% | 2.86 | 32.9 | 9.6  | 3 | 920.43  | 2,758.26 | 0.05111  |
| 1135 | PE | Hg | 50 µM  | 333 | 355 | EALPMDTEV <sub>y</sub> ESPyADPEEIRPK | y10: Phospho (+79.97), y14: Phospho (+79.97)                               | 99.70% | 3.27 | 41.1 | 9.1  | 3 | 947.08  | 2,838.21 | 0.03961  |
| 1136 | PE | Hg | 50 µM  | 333 | 355 | EALPMDTEV <sub>y</sub> ESPyADPEEIRPK | y10: Phospho (+79.97), y14: Phospho (+79.97)                               | 99.70% | 2.79 | 12.9 | 10.5 | 3 | 947.08  | 2,838.21 | 0.03686  |
| 1137 | PE | Hg | 50 µM  | 333 | 355 | EALPMDTEV <sub>y</sub> ESPyADPEEIRPK | y10: Phospho (+79.97), y14: Phospho (+79.97)                               | 99.70% | 3.38 | 53.3 | 13   | 3 | 947.07  | 2,838.20 | 0.02734  |
| 1138 | PE | Hg | 50 µM  | 333 | 355 | EALPMDTEVYESPyADPEEIRPK              | y14: Phospho (+79.97)                                                      | 99.70% | 2.49 | 36.9 | 5.77 | 3 | 920.41  | 2,758.21 | 0.00039  |
| 1139 | PE | Hg | 100 µM | 333 | 355 | EALPmDTEVYESPyADPEEIRPK              | m5: Oxidation (+15.99), y14: Phospho (+79.97)                              | 90.90% | 0    | 0    | 0.68 | 3 | 926.08  | 2,775.21 | 1.00500  |
| 1140 | PE | Hg | 100 µM | 333 | 355 | EALPMDTEVYESPyADPEEIRPK              | y14: Phospho (+79.97)                                                      | 91.40% | 2.66 | 0    | 0    | 2 | 1380.11 | 2,758.21 | 0.00541  |
| 1141 | PE | Hg | 100 µM | 333 | 355 | EALPMDTEVYESPyADPEEIRPK              | y14: Phospho (+79.97)                                                      | 99.70% | 0    | 0    | 3.48 | 3 | 920.75  | 2,759.22 | 1.00700  |
| 1142 | PE | Hg | 100 µM | 333 | 355 | EALPMDTEVYESPyADPEEIRPK              | y14: Phospho (+79.97)                                                      | 99.70% | 2.47 | 16.7 | 1.8  | 3 | 920.41  | 2,758.21 | -0.00236 |
| 1143 | PE | Hg | 100 µM | 333 | 355 | EALPmDTEVYESPyADPEEIRPK              | m5: Oxidation (+15.99), y14: Phospho (+79.97)                              | 99.70% | 2.19 | 15.6 | 2.82 | 3 | 925.74  | 2,774.19 | -0.01400 |
| 1144 | PE | Hg | 100 µM | 333 | 355 | EALPmDTEVYESPyADPEEIRPK              | m5: Oxidation (+15.99), y14: Phospho (+79.97)                              | 99.70% | 2.96 | 16.6 | 3.77 | 3 | 925.75  | 2,774.22 | 0.01621  |
| 1145 | PE | Hg | 100 µM | 333 | 355 | EALPmDTEVYESPyADPEEIRPK              | m5: Oxidation (+15.99), y14: Phospho (+79.97)                              | 99.70% | 4.15 | 30.2 | 3.1  | 3 | 925.74  | 2,774.21 | 0.00926  |
| 1146 | PE | Hg | 100 µM | 333 | 355 | EALPMDTEVYESPyADPEEIRPK              | y14: Phospho (+79.97)                                                      | 99.70% | 2.83 | 35.5 | 4.68 | 3 | 920.41  | 2,758.21 | 0.00588  |
| 1147 | PE | Hg | 100 µM | 333 | 355 | EALPMDTEVYESPyADPEEIRPK              | y14: Phospho (+79.97)                                                      | 99.70% | 1.93 | 21   | 3.33 | 3 | 920.41  | 2,758.21 | 0.00094  |
| 1148 | PE | Hg | 100 µM | 333 | 355 | EALPMDTEV <sub>y</sub> ESPyADPEEIRPK | y10: Phospho (+79.97), y14: Phospho (+79.97)                               | 99.60% | 0    | 28.1 | 7.8  | 3 | 947.06  | 2,838.17 | -0.00763 |

|      |    |    |        |     |     |                                      |                                                                           |        |      |      |      |   |        |          |          |
|------|----|----|--------|-----|-----|--------------------------------------|---------------------------------------------------------------------------|--------|------|------|------|---|--------|----------|----------|
| 1149 | PE | Hg | 100 µM | 333 | 355 | EALPMDTEVYESP <sub>y</sub> ADPEEIRPK | y10: Phospho (+79.97), y14: Phospho (+79.97)                              | 99.60% | 0    | 18.7 | 8.34 | 3 | 947.06 | 2,838.17 | -0.00250 |
| 1150 | PE | Hg | 100 µM | 333 | 355 | EALPMDTEVYESP <sub>y</sub> ADPEEIRPK | y14: Phospho (+79.97)                                                     | 99.70% | 0    | 39.3 | 9.96 | 3 | 920.41 | 2,758.22 | 0.01028  |
| 1151 | PE | Hg | 100 µM | 333 | 355 | EALPMDTEVYESP <sub>y</sub> ADPEEIRPK | y14: Phospho (+79.97)                                                     | 99.70% | 0    | 35.8 | 11.1 | 3 | 920.41 | 2,758.22 | 0.01394  |
| 1152 | PE | Hg | 100 µM | 333 | 355 | EALPMDTEVYESP <sub>y</sub> ADPEEIRPK | y14: Phospho (+79.97)                                                     | 99.70% | 0    | 34.3 | 9.57 | 3 | 920.41 | 2,758.21 | 0.00112  |
| 1153 | PE | Hg | 100 µM | 333 | 355 | EALPMDTEVYESP <sub>y</sub> ADPEEIRPK | y14: Phospho (+79.97)                                                     | 99.70% | 0    | 50.9 | 10.5 | 3 | 920.41 | 2,758.22 | 0.01430  |
| 1154 | PE | Hg | 100 µM | 333 | 355 | EALPMDTEVYESP <sub>y</sub> ADPEEIRPK | y10: Phospho (+79.97)                                                     | 99.70% | 0    | 40.3 | 11.5 | 3 | 920.41 | 2,758.22 | 0.00753  |
| 1155 | PE | Hg | 100 µM | 333 | 355 | EALPMDTEVYESP <sub>y</sub> ADPEEIRPK | y14: Phospho (+79.97)                                                     | 99.70% | 1.47 | 16.4 | 2.32 | 3 | 920.41 | 2,758.20 | -0.00584 |
| 1156 | PE | Hg | 100 µM | 333 | 355 | EALPmDTEVYESP <sub>y</sub> ADPEEIRPK | m5: Oxidation (+15.99), y14: Phospho (+79.97)                             | 99.70% | 1.49 | 27.9 | 9.08 | 3 | 925.74 | 2,774.20 | -0.00173 |
| 1157 | PE | Hg | 100 µM | 333 | 355 | EALPmDTEVYESP <sub>y</sub> ADPEEIRPK | m5: Oxidation (+15.99), y14: Phospho (+79.97)                             | 99.70% | 2.44 | 38.4 | 10.5 | 3 | 925.74 | 2,774.20 | -0.00136 |
| 1158 | PE | Hg | 100 µM | 333 | 355 | EALPMDTEVYESP <sub>y</sub> ADPEEIRPK | y14: Phospho (+79.97)                                                     | 99.70% | 3.82 | 39.6 | 7.44 | 3 | 920.42 | 2,758.23 | 0.01797  |
| 1159 | PE | Hg | 100 µM | 333 | 355 | EALPmDTEVYESP <sub>y</sub> ADPEEIRPK | m5: Oxidation (+15.99), y14: Phospho (+79.97)                             | 99.70% | 1.94 | 39.2 | 7.03 | 3 | 925.75 | 2,774.21 | 0.01090  |
| 1160 | PE | Hg | 100 µM | 333 | 355 | EALPMDTEVYESP <sub>y</sub> ADPEEIRPK | y14: Phospho (+79.97)                                                     | 99.70% | 2.62 | 46.8 | 5.38 | 3 | 920.41 | 2,758.22 | 0.01064  |
| 1161 | PE | Hg | 100 µM | 333 | 355 | EALPMDtEVYESP <sub>y</sub> ADPEEIRPK | t7: Phospho (+79.97), y14: Phospho (+79.97)                               | 99.70% | 0    | 0    | 7.6  | 3 | 947.75 | 2,840.23 | 2.05100  |
| 1162 | PE | Hg | 100 µM | 333 | 355 | EALPMDTEVYESP <sub>y</sub> ADPEEIRPK | y14: Phospho (+79.97)                                                     | 99.70% | 2.25 | 27   | 7.12 | 3 | 920.42 | 2,758.24 | 0.03463  |
| 1163 | PE | Hg | 100 µM | 333 | 355 | EALPMDTEVYESP <sub>y</sub> ADPEEIRPK | y14: Phospho (+79.97)                                                     | 99.70% | 2.37 | 25.1 | 8.7  | 3 | 920.42 | 2,758.25 | 0.04140  |
| 1164 | PE | Hg | 100 µM | 333 | 355 | EALPMDTEVYESP <sub>y</sub> ADPEEIRPK | y10: Phospho (+79.97), y14: Phospho (+79.97)                              | 99.70% | 2.35 | 21.9 | 8.77 | 3 | 947.08 | 2,838.21 | 0.03705  |
| 1165 | PE | Hg | 100 µM | 333 | 355 | EALPMDTEVYESP <sub>y</sub> ADPEEIRPK | y14: Phospho (+79.97)                                                     | 99.70% | 2.86 | 37.2 | 11   | 3 | 920.42 | 2,758.25 | 0.04287  |
| 1166 | PE | Hg | 100 µM | 333 | 355 | EALPMDTEVYESP <sub>y</sub> ADPEEIRPK | y14: Phospho (+79.97)                                                     | 99.70% | 2.69 | 34.3 | 11.6 | 3 | 920.42 | 2,758.25 | 0.03884  |
| 1167 | PE | Hg | 100 µM | 333 | 355 | EALPMDTEVYESP <sub>y</sub> ADPEEIRPK | y10: Phospho (+79.97), y14: Phospho (+79.97)                              | 99.70% | 2.42 | 27.4 | 11.4 | 3 | 947.08 | 2,838.21 | 0.03796  |
| 1168 | PE | Hg | 100 µM | 333 | 355 | EALPMDTEVYESP <sub>y</sub> ADPEEIRPK | y10: Phospho (+79.97), y14: Phospho (+79.97)                              | 99.70% | 2.64 | 22.9 | 11.7 | 3 | 947.08 | 2,838.21 | 0.03137  |
| 1169 | PE | Hg | 100 µM | 333 | 355 | EALPMDTEVYESP <sub>y</sub> ADPEEIRPK | y14: Phospho (+79.97)                                                     | 99.70% | 1.26 | 18.1 | 4.21 | 3 | 920.41 | 2,758.21 | -0.00035 |
| 1170 | PE | PV | 0      | 333 | 355 | EALPMDTEVYESP <sub>y</sub> ADPEEIRPK | y14: Phospho (+79.97)                                                     | 99.70% | 1.21 | 0    | 2.64 | 3 | 920.41 | 2,758.21 | 0.00442  |
| 1171 | PE | PV | 0      | 333 | 355 | EALPMDTEVYESP <sub>y</sub> ADPEEIRPK | y14: Phospho (+79.97)                                                     | 99.70% | 0    | 19.6 | 5.92 | 3 | 920.42 | 2,758.23 | 0.01742  |
| 1172 | PE | PV | 1 µM   | 333 | 355 | EALPmDTEVYESP <sub>y</sub> ADPEEIRPK | m5: Oxidation (+15.99), y14: Phospho (+79.97)                             | 99.70% | 2.61 | 28.5 | 7.96 | 3 | 925.74 | 2,774.20 | -0.00466 |
| 1173 | PE | PV | 3 µM   | 333 | 355 | EALPmDTEVYESP <sub>y</sub> ADPEEIRPK | m5: Oxidation (+15.99), y14: Phospho (+79.97)                             | 99.70% | 0.74 | 0    | 1.29 | 3 | 925.74 | 2,774.20 | -0.00741 |
| 1174 | PE | PV | 10 µM  | 333 | 355 | EALPMDTEVYESP <sub>y</sub> ADPEEIRPK | y14: Phospho (+79.97)                                                     | 99.70% | 1.67 | 0    | 1.82 | 3 | 920.41 | 2,758.20 | -0.00456 |
| 1175 | PE | PV | 10 µM  | 333 | 355 | EALPMDtEVYESP <sub>y</sub> ADPEEIRPK | t7: Phospho (+79.97)                                                      | 99.70% | 2.59 | 19.4 | 6.82 | 3 | 920.42 | 2,758.23 | 0.01742  |
| 1176 | PE | PV | 10 µM  | 333 | 355 | EALPMDTEVYESP <sub>y</sub> ADPEEIRPK | y10: Phospho (+79.97), y14: Phospho (+79.97)                              | 99.70% | 3.31 | 27.2 | 8.31 | 3 | 947.06 | 2,838.16 | -0.01221 |
| 1177 | PE | PV | 10 µM  | 333 | 355 | EALPMDTEVYESP <sub>y</sub> ADPEEIRPK | y14: Phospho (+79.97)                                                     | 99.70% | 4.5  | 32.3 | 7.74 | 3 | 920.41 | 2,758.22 | 0.00716  |
| 1178 | PE | PV | 10 µM  | 333 | 355 | eALPmDTEVYESP <sub>y</sub> ADPEEIRPK | n-term: Dehydrated (-18.01), m5: Oxidation (+15.99), t7: Phospho (+79.97) | 99.70% | 0    | 0    | 12.9 | 3 | 920.08 | 2,757.21 | 1.01400  |
| 1179 | PE | PV | 10 µM  | 333 | 355 | EALPmDTEVYESP <sub>y</sub> ADPEEIRPK | m5: Oxidation (+15.99), y14: Phospho (+79.97)                             | 99.70% | 2.83 | 27.6 | 7.16 | 3 | 925.74 | 2,774.21 | 0.00578  |

|      |    |    |       |     |     |                         |                                               |        |      |      |      |   |        |          |          |
|------|----|----|-------|-----|-----|-------------------------|-----------------------------------------------|--------|------|------|------|---|--------|----------|----------|
| 1180 | PE | PV | 10 µM | 333 | 355 | EALPMDTEVYESPyADPEEIRPK | y14: Phospho (+79.97)                         | 99.70% | 4.51 | 38.8 | 9.92 | 3 | 920.41 | 2,758.22 | 0.00790  |
| 1181 | PE | PV | 10 µM | 333 | 355 | EALPMDTEVYESPyADPEEIRPK | y14: Phospho (+79.97)                         | 99.70% | 3.27 | 22.3 | 8.85 | 3 | 920.41 | 2,758.21 | -0.00218 |
| 1182 | PE | PV | 10 µM | 333 | 355 | EALPMDTEVyESPyADPEEIRPK | y10: Phospho (+79.97), y14: Phospho (+79.97)  | 99.70% | 3.34 | 29.3 | 9.92 | 3 | 947.07 | 2,838.19 | 0.01233  |
| 1183 | PE | PV | 10 µM | 333 | 355 | EALPMDTEVyESPyADPEEIRPK | y10: Phospho (+79.97), y14: Phospho (+79.97)  | 99.70% | 3.86 | 26   | 10.4 | 3 | 947.07 | 2,838.18 | 0.00061  |
| 1184 | PE | PV | 10 µM | 333 | 355 | EALPMDTEVyESPyADPEEIRPK | y10: Phospho (+79.97)                         | 99.70% | 3.65 | 66.8 | 10.8 | 3 | 920.41 | 2,758.21 | 0.00570  |
| 1185 | PE | PV | 10 µM | 333 | 355 | EALPMDTEVyESPyADPEEIRPK | y10: Phospho (+79.97)                         | 99.70% | 4.32 | 65.3 | 10.5 | 3 | 920.41 | 2,758.22 | 0.01009  |
| 1186 | PE | PV | 10 µM | 333 | 355 | EALPMDTEVYESPyADPEEIRPK | y14: Phospho (+79.97)                         | 99.70% | 2.07 | 41.2 | 7.22 | 3 | 920.41 | 2,758.22 | 0.01028  |
| 1187 | PE | PV | 10 µM | 333 | 355 | EALPMDTEVyESPyADPEEIRPK | y10: Phospho (+79.97)                         | 99.70% | 2.05 | 39.1 | 9.6  | 3 | 920.41 | 2,758.22 | 0.00735  |
| 1188 | PE | PV | 10 µM | 333 | 355 | EALPmDTEVYESPyADPEEIRPK | m5: Oxidation (+15.99), y14: Phospho (+79.97) | 99.70% | 2.67 | 50   | 8.33 | 3 | 925.74 | 2,774.20 | 0.00010  |
| 1189 | PE | PV | 10 µM | 333 | 355 | EALPmDTEVYESPyADPEEIRPK | m5: Oxidation (+15.99), y14: Phospho (+79.97) | 99.70% | 2.08 | 42.3 | 6.49 | 3 | 925.74 | 2,774.21 | 0.00816  |
| 1190 | PE | PV | 10 µM | 333 | 355 | EALPMDTEVyESPyADPEEIRPK | y10: Phospho (+79.97)                         | 99.70% | 2.89 | 40.8 | 10.5 | 3 | 920.41 | 2,758.22 | 0.01430  |
| 1191 | PE | PV | 10 µM | 333 | 355 | EALPMDTEVyESPyADPEEIRPK | y10: Phospho (+79.97)                         | 99.70% | 3.23 | 57.2 | 8.92 | 3 | 920.41 | 2,758.22 | 0.00790  |
| 1192 | PE | PV | 10 µM | 333 | 355 | EALPMDTEVYESPyADPEEIRPK | y14: Phospho (+79.97)                         | 99.70% | 4.2  | 41.8 | 9.11 | 3 | 920.41 | 2,758.22 | 0.01412  |
| 1193 | PE | PV | 10 µM | 333 | 355 | EALPmDTEVYESPyADPEEIRPK | m5: Oxidation (+15.99), y14: Phospho (+79.97) | 83.10% | 0.87 | 0    | 1.62 | 3 | 925.75 | 2,774.22 | 0.01310  |
| 1194 | PE | PV | 10 µM | 333 | 355 | EALPMDTEVYESPyADPEEIRPK | y14: Phospho (+79.97)                         | 99.70% | 2.52 | 45.3 | 7.2  | 3 | 920.41 | 2,758.21 | 0.00497  |
| 1195 | PE | PV | 10 µM | 333 | 355 | EALPmDTEVYESPyADPEEIRPK | m5: Oxidation (+15.99), y14: Phospho (+79.97) | 95.70% | 0    | 0    | 2.72 | 3 | 926.42 | 2,776.24 | 2.03600  |
| 1196 | PE | PV | 10 µM | 333 | 355 | EALPMDTEVYESPyADPEEIRPK | y14: Phospho (+79.97)                         | 99.70% | 2.45 | 27.9 | 7.8  | 3 | 920.43 | 2,758.26 | 0.04836  |
| 1197 | PE | PV | 10 µM | 333 | 355 | EALPMDTEVYESPyADPEEIRPK | y14: Phospho (+79.97)                         | 99.70% | 2.65 | 10.9 | 6.42 | 3 | 920.42 | 2,758.25 | 0.03811  |
| 1198 | PE | PV | 10 µM | 333 | 355 | EALPMDTEVYESPyADPEEIRPK | y14: Phospho (+79.97)                         | 99.70% | 2.75 | 32.2 | 8.21 | 3 | 920.43 | 2,758.26 | 0.04928  |
| 1199 | PE | PV | 10 µM | 333 | 355 | EALPMDTEVYESPyADPEEIRPK | y14: Phospho (+79.97)                         | 99.70% | 2.91 | 34.9 | 9.74 | 3 | 920.43 | 2,758.26 | 0.04818  |
| 1200 | PE | PV | 10 µM | 333 | 355 | EALPMDTEVYESPyADPEEIRPK | y14: Phospho (+79.97)                         | 99.70% | 2.67 | 29   | 9.44 | 3 | 920.43 | 2,758.25 | 0.04543  |
| 1201 | PE | PV | 10 µM | 333 | 355 | EALPMDtEVYESPyADPEEIRPK | t7: Phospho (+79.97)                          | 99.70% | 0    | 0    | 10.4 | 3 | 921.09 | 2,760.25 | 2.03700  |
| 1202 | PE | PV | 10 µM | 333 | 355 | EALPMDTEVYESPyADPEEIRPK | y14: Phospho (+79.97)                         | 99.70% | 2.57 | 37.5 | 10.7 | 3 | 920.43 | 2,758.26 | 0.04671  |
| 1203 | PE | PV | 30 µM | 333 | 355 | EALPMDTEVYESPyADPEEIRPK | y14: Phospho (+79.97)                         | 99.70% | 2.11 | 25.4 | 1.38 | 3 | 920.41 | 2,758.21 | -0.00035 |
| 1204 | PE | PV | 30 µM | 333 | 355 | EALPmDTEVYESPyADPEEIRPK | m5: Oxidation (+15.99), s12: Phospho (+79.97) | 99.70% | 2.29 | 26.4 | 2.89 | 3 | 925.74 | 2,774.21 | 0.00267  |
| 1205 | PE | PV | 30 µM | 333 | 355 | EALPmDTEVYESPyADPEEIRPK | m5: Oxidation (+15.99), y14: Phospho (+79.97) | 99.70% | 2.32 | 19.1 | 3.89 | 3 | 925.74 | 2,774.21 | 0.00743  |
| 1206 | PE | PV | 30 µM | 333 | 355 | EALPmDTEVyESPyADPEEIRPK | m5: Oxidation (+15.99), y10: Phospho (+79.97) | 99.70% | 1.37 | 18.9 | 3.89 | 3 | 925.74 | 2,774.21 | 0.00212  |
| 1207 | PE | PV | 30 µM | 333 | 355 | EALPMDTEVYESPyADPEEIRPK | y14: Phospho (+79.97)                         | 99.70% | 1.89 | 27.6 | 6.21 | 3 | 920.41 | 2,758.22 | 0.00790  |
| 1208 | PE | PV | 30 µM | 333 | 355 | EALPMDTEVYESPyADPEEIRPK | y14: Phospho (+79.97)                         | 99.70% | 3.19 | 52.6 | 8.52 | 3 | 920.41 | 2,758.21 | 0.00204  |
| 1209 | PE | PV | 30 µM | 333 | 355 | EALPMDTEVyESPyADPEEIRPK | y10: Phospho (+79.97)                         | 99.70% | 2.46 | 27.8 | 6.85 | 3 | 920.41 | 2,758.22 | 0.01357  |
| 1210 | PE | PV | 30 µM | 333 | 355 | EALPMDTEVYESPyADPEEIRPK | y14: Phospho (+79.97)                         | 99.70% | 3.9  | 36.5 | 7.54 | 3 | 920.42 | 2,758.23 | 0.01687  |
| 1211 | PE | PV | 30 µM | 333 | 355 | EALPMDTEVYESPyADPEEIRPK | y14: Phospho (+79.97)                         | 99.70% | 4.06 | 52.9 | 9.89 | 3 | 920.41 | 2,758.22 | 0.01192  |
| 1212 | PE | PV | 30 µM | 333 | 355 | EALPMDTEVyESPyADPEEIRPK | y10: Phospho (+79.97), y14: Phospho (+79.97)  | 99.70% | 3.98 | 30   | 7.85 | 3 | 947.07 | 2,838.18 | 0.00574  |
| 1213 | PE | PV | 30 µM | 333 | 355 | EALPMDTEVYESPyADPEEIRPK | y14: Phospho (+79.97)                         | 99.70% | 3.27 | 43.1 | 9.96 | 3 | 920.42 | 2,758.22 | 0.01613  |

|      |    |    |       |     |     |                         |                                                                      |        |      |      |      |   |         |          |          |
|------|----|----|-------|-----|-----|-------------------------|----------------------------------------------------------------------|--------|------|------|------|---|---------|----------|----------|
| 1214 | PE | PV | 30 µM | 333 | 355 | EALPmDTEVYESPyADPEEIRPK | m5: Oxidation (+15.99), y14: Phospho (+79.97)                        | 99.70% | 2.88 | 34   | 7.05 | 3 | 925.74  | 2,774.21 | 0.00505  |
| 1215 | PE | PV | 30 µM | 333 | 355 | EALPmDTEVγESPyADPEEIRPK | m5: Oxidation (+15.99), y10: Phospho (+79.97), y14: Phospho (+79.97) | 99.70% | 3.16 | 43.1 | 9.01 | 3 | 952.40  | 2,854.18 | 0.01058  |
| 1216 | PE | PV | 30 µM | 333 | 355 | EALPMDTEVγESPyADPEEIRPK | y10: Phospho (+79.97), y14: Phospho (+79.97)                         | 99.70% | 2.78 | 33.8 | 9.68 | 3 | 947.07  | 2,838.18 | 0.00317  |
| 1217 | PE | PV | 30 µM | 333 | 355 | EALPMDTEVγESPyADPEEIRPK | y10: Phospho (+79.97), y14: Phospho (+79.97)                         | 99.70% | 3.82 | 28   | 8.19 | 3 | 947.07  | 2,838.18 | 0.00262  |
| 1218 | PE | PV | 30 µM | 333 | 355 | EALPmDTEVγESPyADPEEIRPK | m5: Oxidation (+15.99), y10: Phospho (+79.97), y14: Phospho (+79.97) | 99.70% | 3.09 | 42.3 | 10.1 | 3 | 952.40  | 2,854.18 | 0.01314  |
| 1219 | PE | PV | 30 µM | 333 | 355 | EALPmDTEVγESPYADPEEIRPK | m5: Oxidation (+15.99), y10: Phospho (+79.97)                        | 99.70% | 3.3  | 39.2 | 7.6  | 3 | 925.74  | 2,774.21 | 0.00724  |
| 1220 | PE | PV | 30 µM | 333 | 355 | EALPmDTEVYESPyADPEEIRPK | m5: Oxidation (+15.99), y14: Phospho (+79.97)                        | 99.70% | 3.08 | 36   | 7.47 | 3 | 925.74  | 2,774.21 | 0.00834  |
| 1221 | PE | PV | 30 µM | 333 | 355 | EALPMDTEVγESPYADPEEIRPK | y10: Phospho (+79.97)                                                | 99.70% | 3.68 | 43.5 | 10.3 | 3 | 920.41  | 2,758.22 | 0.01064  |
| 1222 | PE | PV | 30 µM | 333 | 355 | EALPMDTEVγESPYADPEEIRPK | y10: Phospho (+79.97)                                                | 99.70% | 4.09 | 50.9 | 10.7 | 3 | 920.41  | 2,758.22 | 0.00863  |
| 1223 | PE | PV | 30 µM | 333 | 355 | EALPMDTEVγESPYADPEEIRPK | y10: Phospho (+79.97)                                                | 99.70% | 3.7  | 53.9 | 10.5 | 3 | 920.41  | 2,758.22 | 0.00753  |
| 1224 | PE | PV | 30 µM | 333 | 355 | EALPmDTEVYESPYADPEEIRPK | m5: Oxidation (+15.99), s12: Phospho (+79.97)                        | 94.90% | 0.25 | 0    | 1.38 | 2 | 1388.12 | 2,774.22 | 0.01293  |
| 1225 | PE | PV | 30 µM | 333 | 355 | EALPMDTEVYESPyADPEEIRPK | y14: Phospho (+79.97)                                                | 99.70% | 1.3  | 14.2 | 2.64 | 3 | 920.41  | 2,758.21 | -0.00126 |
| 1226 | PE | PV | 30 µM | 333 | 355 | EALPmDTEVYESPyADPEEIRPK | m5: Oxidation (+15.99), y14: Phospho (+79.97)                        | 99.70% | 1.27 | 16.6 | 5.19 | 3 | 925.75  | 2,774.21 | 0.01036  |
| 1227 | PE | PV | 30 µM | 333 | 355 | EALPmDTEVYESPYADPEEIRPK | m5: Oxidation (+15.99), s12: Phospho (+79.97)                        | 99.70% | 1.32 | 22.8 | 2.37 | 3 | 925.74  | 2,774.20 | -0.00851 |
| 1228 | PE | PV | 30 µM | 333 | 355 | EALPMDtEVYESPYADPEEIRPK | t7: Phospho (+79.97)                                                 | 99.70% | 2.96 | 58.4 | 14.3 | 3 | 920.41  | 2,758.20 | -0.00474 |
| 1229 | PE | PV | 30 µM | 333 | 355 | EALPmDTEVYESPYADPEEIRPK | m5: Oxidation (+15.99), s12: Phospho (+79.97)                        | 99.70% | 3.44 | 47.6 | 10.1 | 3 | 925.74  | 2,774.20 | -0.00265 |
| 1230 | PE | PV | 30 µM | 333 | 355 | EALPMDTEVYESPyADPEEIRPK | y14: Phospho (+79.97)                                                | 99.70% | 3.94 | 50.9 | 7.21 | 3 | 920.41  | 2,758.22 | 0.00881  |
| 1231 | PE | PV | 30 µM | 333 | 355 | EALPMDTEVYESPyADPEEIRPK | y14: Phospho (+79.97)                                                | 99.70% | 2.9  | 16.4 | 5.64 | 3 | 920.41  | 2,758.20 | -0.00399 |
| 1232 | PE | PV | 30 µM | 333 | 355 | eALPMDTEVYESPyADPEEIRPK | n-term: Dehydrated (-18.01), y14: Phospho (+79.97)                   | 99.70% | 0    | 0    | 9.7  | 3 | 914.41  | 2,740.19 | -0.00480 |
| 1233 | PE | PV | 30 µM | 333 | 355 | EALPMDTEVγESPyADPEEIRPK | y10: Phospho (+79.97), y14: Phospho (+79.97)                         | 99.70% | 3.3  | 30.7 | 8.92 | 3 | 947.06  | 2,838.16 | -0.01056 |
| 1234 | PE | PV | 30 µM | 333 | 355 | EALPMDTEVγESPYADPEEIRPK | y10: Phospho (+79.97)                                                | 99.70% | 3.24 | 43.6 | 10.1 | 3 | 920.41  | 2,758.21 | 0.00313  |
| 1235 | PE | PV | 30 µM | 333 | 355 | EALPMDTEVγESPyADPEEIRPK | y10: Phospho (+79.97), y14: Phospho (+79.97)                         | 99.70% | 4.09 | 36   | 11.5 | 3 | 947.06  | 2,838.17 | -0.00305 |
| 1236 | PE | PV | 30 µM | 333 | 355 | EALPmDTEVYESPYADPEEIRPK | m5: Oxidation (+15.99), s12: Phospho (+79.97)                        | 99.70% | 3.09 | 40.1 | 6.6  | 3 | 925.74  | 2,774.20 | -0.00100 |
| 1237 | PE | PV | 30 µM | 333 | 355 | EALPMDtEVYESPYADPEEIRPK | t7: Phospho (+79.97)                                                 | 99.70% | 3.56 | 53.9 | 12.3 | 3 | 920.41  | 2,758.21 | 0.00222  |
| 1238 | PE | PV | 30 µM | 333 | 355 | EALPMDTEVYESPyADPEEIRPK | y14: Phospho (+79.97)                                                | 99.70% | 4.23 | 30   | 8.02 | 3 | 920.41  | 2,758.22 | 0.00643  |
| 1239 | PE | PV | 30 µM | 333 | 355 | EALPMDtEVYESPYADPEEIRPK | t7: Phospho (+79.97)                                                 | 99.70% | 3.3  | 50.6 | 12.5 | 3 | 920.41  | 2,758.22 | 0.01229  |
| 1240 | PE | PV | 30 µM | 333 | 355 | EALPmDTEVYESPyADPEEIRPK | m5: Oxidation (+15.99), y14: Phospho (+79.97)                        | 99.70% | 3.86 | 50.5 | 12.7 | 3 | 925.75  | 2,774.21 | 0.01054  |

|      |    |    |        |     |     |                         |                                                                      |        |      |      |      |   |         |          |          |
|------|----|----|--------|-----|-----|-------------------------|----------------------------------------------------------------------|--------|------|------|------|---|---------|----------|----------|
| 1241 | PE | PV | 30 µM  | 333 | 355 | EALPMDTEVYESPyADPEEIRPK | y14: Phospho (+79.97)                                                | 99.70% | 3.69 | 40.9 | 9.37 | 3 | 920.41  | 2,758.22 | 0.00808  |
| 1242 | PE | PV | 30 µM  | 333 | 355 | EALPmDTEVYESPyADPEEIRPK | m5: Oxidation (+15.99), s12: Phospho (+79.97)                        | 99.70% | 0    | 0    | 4.37 | 3 | 926.09  | 2,775.24 | 1.04100  |
| 1243 | PE | PV | 30 µM  | 333 | 355 | EALPmDTEVYESPyADPEEIRPK | m5: Oxidation (+15.99), y14: Phospho (+79.97)                        | 99.70% | 0    | 0    | 5.66 | 3 | 926.42  | 2,776.24 | 2.03700  |
| 1244 | PE | PV | 30 µM  | 333 | 355 | EALPmDTEVYESPyADPEEIRPK | m5: Oxidation (+15.99), s12: Phospho (+79.97)                        | 99.70% | 0    | 0    | 8.04 | 3 | 926.09  | 2,775.24 | 1.03600  |
| 1245 | PE | PV | 30 µM  | 333 | 355 | EALPMDTEVYESPyADPEEIRPK | y14: Phospho (+79.97)                                                | 99.70% | 2.97 | 16.6 | 7.49 | 3 | 920.43  | 2,758.25 | 0.04470  |
| 1246 | PE | PV | 30 µM  | 333 | 355 | EALPMDTEVYESPyADPEEIRPK | y14: Phospho (+79.97)                                                | 99.70% | 1.36 | 22   | 5.48 | 2 | 1380.13 | 2,758.25 | 0.03861  |
| 1247 | PE | PV | 30 µM  | 333 | 355 | EALPMDTEVYESPyADPEEIRPK | y14: Phospho (+79.97)                                                | 99.70% | 3.04 | 35.9 | 8    | 3 | 920.42  | 2,758.25 | 0.04232  |
| 1248 | PE | PV | 30 µM  | 333 | 355 | EALPMDTEVYESPyADPEEIRPK | y14: Phospho (+79.97)                                                | 99.70% | 2.98 | 34.8 | 8.52 | 3 | 920.42  | 2,758.25 | 0.03902  |
| 1249 | PE | PV | 30 µM  | 333 | 355 | EALPMDTEVYESPyADPEEIRPK | s12: Phospho (+79.97)                                                | 99.70% | 1.86 | 10.7 | 8.22 | 3 | 920.42  | 2,758.24 | 0.02767  |
| 1250 | PE | PV | 30 µM  | 333 | 355 | EALPMDTEVYESPyADPEEIRPK | s12: Phospho (+79.97)                                                | 99.70% | 2.28 | 34.3 | 8.68 | 3 | 920.43  | 2,758.26 | 0.04946  |
| 1251 | PE | PV | 30 µM  | 333 | 355 | EALPMDTEVYESPyADPEEIRPK | y14: Phospho (+79.97)                                                | 99.70% | 2.77 | 28.7 | 10.3 | 3 | 920.42  | 2,758.25 | 0.04287  |
| 1252 | PE | PV | 30 µM  | 333 | 355 | EALPMDTEVYESPyADPEEIRPK | y14: Phospho (+79.97)                                                | 99.70% | 2.87 | 46.8 | 10.9 | 3 | 920.43  | 2,758.25 | 0.04488  |
| 1253 | PE | PV | 30 µM  | 333 | 355 | EALPmDTEVYESPyADPEEIRPK | m5: Oxidation (+15.99), y10: Phospho (+79.97)                        | 99.70% | 2.79 | 28   | 8.12 | 3 | 925.75  | 2,774.24 | 0.03544  |
| 1254 | PE | PV | 30 µM  | 333 | 355 | EALPMDTEVYESPyADPEEIRPK | y14: Phospho (+79.97)                                                | 99.70% | 0    | 20.5 | 10.8 | 3 | 920.43  | 2,758.26 | 0.05367  |
| 1255 | PE | PV | 30 µM  | 333 | 355 | EALPMDTEVYESPyADPEEIRPK | s12: Phospho (+79.97)                                                | 99.70% | 2.79 | 25.6 | 12.4 | 3 | 920.42  | 2,758.25 | 0.03774  |
| 1256 | PE | PV | 30 µM  | 333 | 355 | EALPMDtEVYESPyADPEEIRPK | t7: Phospho (+79.97)                                                 | 99.70% | 2.76 | 33.4 | 14.2 | 3 | 920.42  | 2,758.25 | 0.03994  |
| 1257 | PE | PV | 30 µM  | 333 | 355 | EALPMDtEVYESPyADPEEIRPK | t7: Phospho (+79.97)                                                 | 99.70% | 2.78 | 43.8 | 12.1 | 3 | 920.43  | 2,758.26 | 0.04671  |
| 1258 | PE | PV | 30 µM  | 333 | 355 | EALPMDTEVYESPyADPEEIRPK | y10: Phospho (+79.97)                                                | 99.70% | 2.96 | 41.1 | 13.9 | 3 | 920.42  | 2,758.25 | 0.03884  |
| 1259 | PE | PV | 30 µM  | 333 | 355 | EALPMDTEVYESPyADPEEIRPK | y10: Phospho (+79.97)                                                | 99.70% | 3.13 | 56.9 | 12.2 | 3 | 920.42  | 2,758.25 | 0.03628  |
| 1260 | PE | PV | 30 µM  | 333 | 355 | EALPMDTEVYESPyADPEEIRPK | y10: Phospho (+79.97)                                                | 99.70% | 3.16 | 54.3 | 11   | 3 | 920.42  | 2,758.25 | 0.03774  |
| 1261 | PE | PV | 30 µM  | 333 | 355 | EALPMDtEVYESPyADPEEIRPK | t7: Phospho (+79.97)                                                 | 99.70% | 0    | 0    | 11.5 | 3 | 921.09  | 2,760.25 | 2.04200  |
| 1262 | PE | PV | 30 µM  | 333 | 355 | EALPMDtEVYESPyADPEEIRPK | t7: Phospho (+79.97)                                                 | 99.70% | 0    | 0    | 12   | 3 | 921.09  | 2,760.25 | 2.04200  |
| 1263 | PE | PV | 100 µM | 333 | 355 | EALPMDTEVYESPyADPEEIRPK | y14: Phospho (+79.97)                                                | 95.20% | 1.51 | 0    | 1.05 | 3 | 920.41  | 2,758.21 | 0.00020  |
| 1264 | PE | PV | 100 µM | 333 | 355 | EALPmDTEVYESPyADPEEIRPK | m5: Oxidation (+15.99), y14: Phospho (+79.97)                        | 96.40% | 1.95 | 0    | 1.19 | 3 | 925.74  | 2,774.21 | 0.00578  |
| 1265 | PE | PV | 100 µM | 333 | 355 | EALPMDTEVYESPyADPEEIRPK | s12: Phospho (+79.97)                                                | 99.70% | 2.49 | 36.3 | 2.62 | 3 | 920.41  | 2,758.20 | -0.00456 |
| 1266 | PE | PV | 100 µM | 333 | 355 | EALPMDTEVYESPyADPEEIRPK | y14: Phospho (+79.97)                                                | 99.70% | 2.19 | 27.4 | 5.24 | 3 | 920.41  | 2,758.21 | 0.00460  |
| 1267 | PE | PV | 100 µM | 333 | 355 | EALPmDTEVYESPyADPEEIRPK | m5: Oxidation (+15.99), y10: Phospho (+79.97), y14: Phospho (+79.97) | 99.70% | 1.71 | 21.3 | 5.11 | 3 | 952.40  | 2,854.17 | 0.00215  |
| 1268 | PE | PV | 100 µM | 333 | 355 | EALPmDTEVYESPyADPEEIRPK | m5: Oxidation (+15.99), y14: Phospho (+79.97)                        | 99.70% | 3.07 | 28.5 | 6.1  | 3 | 925.74  | 2,774.21 | 0.00431  |
| 1269 | PE | PV | 100 µM | 333 | 355 | EALPMDTEVYESPyADPEEIRPK | y10: Phospho (+79.97), y14: Phospho (+79.97)                         | 99.70% | 2.11 | 30.1 | 8.24 | 3 | 947.06  | 2,838.17 | -0.00800 |
| 1270 | PE | PV | 100 µM | 333 | 355 | EALPMDTEVYESPyADPEEIRPK | y10: Phospho (+79.97)                                                | 99.70% | 2.15 | 53.4 | 10   | 3 | 920.41  | 2,758.21 | 0.00149  |
| 1271 | PE | PV | 100 µM | 333 | 355 | eALPMDTEVYESPyADPEEIRPK | n-term: Dehydrated (-18.01), s12: Phospho (+79.97)                   | 99.70% | 0    | 0    | 6.92 | 3 | 915.08  | 2,742.21 | 2.01300  |
| 1272 | PE | PV | 100 µM | 333 | 355 | EALPMDTEVYESPyADPEEIRPK | y14: Phospho (+79.97)                                                | 99.70% | 3.68 | 34.4 | 7.72 | 3 | 920.41  | 2,758.22 | 0.01211  |
| 1273 | PE | PV | 100 µM | 333 | 355 | EALPMDTEVYESPyADPEEIRPK | y10: Phospho (+79.97), y14: Phospho (+79.97)                         | 99.70% | 2.76 | 39.7 | 5.92 | 3 | 947.07  | 2,838.18 | 0.00793  |
| 1274 | PE | PV | 100 µM | 333 | 355 | EALPMDTEVYESPyADPEEIRPK | y14: Phospho (+79.97)                                                | 99.70% | 4.04 | 28   | 8.15 | 3 | 920.41  | 2,758.22 | 0.00808  |

|      |    |    |        |     |     |                                      |                                                                      |        |      |      |      |   |        |          |          |
|------|----|----|--------|-----|-----|--------------------------------------|----------------------------------------------------------------------|--------|------|------|------|---|--------|----------|----------|
| 1275 | PE | PV | 100 µM | 333 | 355 | EALPmDTEV <sub>y</sub> ESPyADPEEIRPK | m5: Oxidation (+15.99), y10: Phospho (+79.97), y14: Phospho (+79.97) | 99.70% | 2.56 | 25.3 | 9.01 | 3 | 952.39 | 2,854.16 | -0.00902 |
| 1276 | PE | PV | 100 µM | 333 | 355 | EALPmDTEV <sub>y</sub> ESPyADPEEIRPK | m5: Oxidation (+15.99), y14: Phospho (+79.97)                        | 99.70% | 3.44 | 29.4 | 7.82 | 3 | 925.75 | 2,774.21 | 0.01072  |
| 1277 | PE | PV | 100 µM | 333 | 355 | EALPMDTEV <sub>y</sub> ESPyADPEEIRPK | y14: Phospho (+79.97)                                                | 99.70% | 3    | 42.7 | 11   | 3 | 920.42 | 2,758.22 | 0.01540  |
| 1278 | PE | PV | 100 µM | 333 | 355 | EALPmDTEV <sub>y</sub> ESPyADPEEIRPK | m5: Oxidation (+15.99), y14: Phospho (+79.97)                        | 99.70% | 2.86 | 17.2 | 8.96 | 3 | 925.75 | 2,774.21 | 0.01072  |
| 1279 | PE | PV | 100 µM | 333 | 355 | EALPmDTEV <sub>y</sub> ESPyADPEEIRPK | m5: Oxidation (+15.99), y10: Phospho (+79.97), y14: Phospho (+79.97) | 99.70% | 3.89 | 49.4 | 9.34 | 3 | 952.40 | 2,854.18 | 0.00856  |
| 1280 | PE | PV | 100 µM | 333 | 355 | EALPmDTEV <sub>y</sub> ESPyADPEEIRPK | m5: Oxidation (+15.99), y10: Phospho (+79.97), y14: Phospho (+79.97) | 99.70% | 3.51 | 21.1 | 10   | 3 | 952.40 | 2,854.18 | 0.01113  |
| 1281 | PE | PV | 100 µM | 333 | 355 | EALPmDTEV <sub>y</sub> ESPyADPEEIRPK | m5: Oxidation (+15.99), y10: Phospho (+79.97), y14: Phospho (+79.97) | 99.70% | 2.75 | 27   | 10.6 | 3 | 952.40 | 2,854.18 | 0.00527  |
| 1282 | PE | PV | 100 µM | 333 | 355 | EALPMDTEV <sub>y</sub> ESPyADPEEIRPK | y10: Phospho (+79.97), y14: Phospho (+79.97)                         | 99.70% | 4.07 | 29.4 | 12.2 | 3 | 947.07 | 2,838.18 | 0.00683  |
| 1283 | PE | PV | 100 µM | 333 | 355 | EALPMDTEV <sub>y</sub> ESPyADPEEIRPK | y10: Phospho (+79.97), y14: Phospho (+79.97)                         | 99.70% | 4.48 | 31.4 | 12.4 | 3 | 947.07 | 2,838.18 | 0.00390  |
| 1284 | PE | PV | 100 µM | 333 | 355 | EALPmDTEV <sub>y</sub> ESPyADPEEIRPK | m5: Oxidation (+15.99), y10: Phospho (+79.97)                        | 99.70% | 3.3  | 31.6 | 8.4  | 3 | 925.74 | 2,774.21 | 0.00944  |
| 1285 | PE | PV | 100 µM | 333 | 355 | EALPMDTEV <sub>y</sub> ESPyADPEEIRPK | y10: Phospho (+79.97)                                                | 99.70% | 3.23 | 57.1 | 9.59 | 3 | 920.42 | 2,758.23 | 0.01723  |
| 1286 | PE | PV | 100 µM | 333 | 355 | EALPMDTEV <sub>y</sub> ESPyADPEEIRPK | y10: Phospho (+79.97)                                                | 99.70% | 4.1  | 41.1 | 11.4 | 3 | 920.41 | 2,758.22 | 0.00918  |
| 1287 | PE | PV | 100 µM | 333 | 355 | EALPMDTEV <sub>y</sub> ESPyADPEEIRPK | y10: Phospho (+79.97)                                                | 99.70% | 4.18 | 58.6 | 11.9 | 3 | 920.41 | 2,758.22 | 0.00936  |
| 1288 | PE | PV | 100 µM | 333 | 355 | EALPmDTEV <sub>y</sub> ESPyADPEEIRPK | m5: Oxidation (+15.99), y10: Phospho (+79.97)                        | 99.70% | 3.95 | 64.9 | 11.2 | 3 | 925.74 | 2,774.21 | 0.00889  |
| 1289 | PE | PV | 100 µM | 333 | 355 | EALPmDTEV <sub>y</sub> ESPyADPEEIRPK | m5: Oxidation (+15.99), y10: Phospho (+79.97)                        | 99.70% | 4.19 | 52.2 | 9.41 | 3 | 925.75 | 2,774.21 | 0.01054  |
| 1290 | PE | PV | 100 µM | 333 | 355 | EALPMDTEV <sub>y</sub> ESPyADPEEIRPK | y10: Phospho (+79.97)                                                | 99.70% | 4.49 | 65   | 10.4 | 3 | 920.41 | 2,758.22 | 0.00826  |
| 1291 | PE | PV | 100 µM | 333 | 355 | EALPMDTEV <sub>y</sub> ESPyADPEEIRPK | y14: Phospho (+79.97)                                                | 99.70% | 1.72 | 28.1 | 2.54 | 3 | 920.41 | 2,758.21 | -0.00071 |
| 1292 | PE | PV | 100 µM | 333 | 355 | EALPmDTEV <sub>y</sub> ESPyADPEEIRPK | m5: Oxidation (+15.99), y14: Phospho (+79.97)                        | 99.70% | 1.92 | 37.7 | 6.55 | 3 | 925.74 | 2,774.20 | -0.00576 |
| 1293 | PE | PV | 100 µM | 333 | 355 | EALPmDTEV <sub>y</sub> ESPyADPEEIRPK | m5: Oxidation (+15.99), t7: Phospho (+79.97)                         | 99.70% | 3.08 | 47.4 | 11.3 | 3 | 925.74 | 2,774.20 | -0.00759 |
| 1294 | PE | PV | 100 µM | 333 | 355 | eALPMDTEV <sub>y</sub> ESPyADPEEIRPK | n-term: Dehydrated (-18.01), y14: Phospho (+79.97)                   | 99.30% | 0    | 0    | 4.55 | 3 | 914.40 | 2,740.19 | -0.00846 |
| 1295 | PE | PV | 100 µM | 333 | 355 | EALPmDTEV <sub>y</sub> ESPyADPEEIRPK | m5: Oxidation (+15.99), s12: Phospho (+79.97), y14: Phospho (+79.97) | 99.70% | 0    | 20.7 | 7.96 | 3 | 952.41 | 2,854.20 | 0.02815  |
| 1296 | PE | PV | 100 µM | 333 | 355 | EALPMDTEV <sub>y</sub> ESPyADPEEIRPK | y14: Phospho (+79.97)                                                | 99.70% | 1.78 | 18.2 | 5.38 | 3 | 920.41 | 2,758.20 | -0.01206 |
| 1297 | PE | PV | 100 µM | 333 | 355 | EALPmDTEV <sub>y</sub> ESPyADPEEIRPK | m5: Oxidation (+15.99), y10: Phospho (+79.97), y14: Phospho (+79.97) | 99.70% | 3.58 | 39.1 | 6.66 | 3 | 952.40 | 2,854.17 | 0.00325  |

|      |    |    |        |     |     |                         |                                                                      |        |      |      |      |   |        |          |          |
|------|----|----|--------|-----|-----|-------------------------|----------------------------------------------------------------------|--------|------|------|------|---|--------|----------|----------|
| 1298 | PE | PV | 100 µM | 333 | 355 | EALPMDTEVYESPADPEEIRPK  | y10: Phospho (+79.97), y14: Phospho (+79.97)                         | 99.70% | 3.49 | 29.1 | 8.68 | 3 | 947.06 | 2,838.16 | -0.01697 |
| 1299 | PE | PV | 100 µM | 333 | 355 | EALPmDTEVYESPADPEEIRPK  | m5: Oxidation (+15.99), y10: Phospho (+79.97), y14: Phospho (+79.97) | 99.70% | 3.22 | 45.8 | 7.49 | 3 | 952.40 | 2,854.17 | -0.00352 |
| 1300 | PE | PV | 100 µM | 333 | 355 | EALPMDTEVYESPADPEEIRPK  | y10: Phospho (+79.97)                                                | 99.70% | 2.98 | 45.2 | 8.23 | 3 | 920.41 | 2,758.21 | 0.00130  |
| 1301 | PE | PV | 100 µM | 333 | 355 | EALPMDTEVYESPADPEEIRPK  | y10: Phospho (+79.97), y14: Phospho (+79.97)                         | 99.70% | 3.82 | 36   | 7.7  | 3 | 947.06 | 2,838.17 | -0.00580 |
| 1302 | PE | PV | 100 µM | 333 | 355 | EALPMDTEVYESPADPEEIRPK  | y10: Phospho (+79.97), y14: Phospho (+79.97)                         | 99.70% | 2.95 | 29.6 | 8    | 3 | 947.06 | 2,838.17 | -0.00269 |
| 1303 | PE | PV | 100 µM | 333 | 355 | EALPMDTEVYESPADPEEIRPK  | y14: Phospho (+79.97)                                                | 99.70% | 3.76 | 38.4 | 9.31 | 3 | 920.41 | 2,758.20 | -0.00511 |
| 1304 | PE | PV | 100 µM | 333 | 355 | EALPmDTEVYESPADPEEIRPK  | m5: Oxidation (+15.99), y14: Phospho (+79.97)                        | 99.70% | 2.9  | 27.4 | 9.06 | 3 | 925.74 | 2,774.21 | 0.00212  |
| 1305 | PE | PV | 100 µM | 333 | 355 | EALPmDTEVYESPADPEEIRPK  | m5: Oxidation (+15.99), y14: Phospho (+79.97)                        | 99.70% | 3.28 | 33.7 | 9.44 | 3 | 925.74 | 2,774.21 | 0.00285  |
| 1306 | PE | PV | 100 µM | 333 | 355 | EALPMDTEVYEsPYADPEEIRPK | s12: Phospho (+79.97)                                                | 99.70% | 2.66 | 38.1 | 9.41 | 3 | 920.41 | 2,758.21 | -0.00071 |
| 1307 | PE | PV | 100 µM | 333 | 355 | EALPMDtEVYESPADPEEIRPK  | t7: Phospho (+79.97)                                                 | 99.70% | 3.96 | 48.2 | 9.57 | 3 | 920.41 | 2,758.21 | -0.00163 |
| 1308 | PE | PV | 100 µM | 333 | 355 | EALPmDTEVYESPADPEEIRPK  | m5: Oxidation (+15.99), y10: Phospho (+79.97)                        | 99.70% | 3.95 | 56.8 | 9.41 | 3 | 925.74 | 2,774.20 | 0.00010  |
| 1309 | PE | PV | 100 µM | 333 | 355 | EALPmDTEVYESPADPEEIRPK  | m5: Oxidation (+15.99), y10: Phospho (+79.97)                        | 99.70% | 4.05 | 56.8 | 10.3 | 3 | 925.74 | 2,774.20 | 0.00120  |
| 1310 | PE | PV | 100 µM | 333 | 355 | EALPmDtEVYESPADPEEIRPK  | m5: Oxidation (+15.99), t7: Phospho (+79.97)                         | 86.60% | 0.99 | 0    | 0    | 3 | 925.74 | 2,774.21 | 0.00798  |
| 1311 | PE | PV | 100 µM | 333 | 355 | EALPMDTEVYEsPYADPEEIRPK | s12: Phospho (+79.97)                                                | 99.70% | 2.67 | 33.2 | 13.1 | 3 | 920.41 | 2,758.22 | 0.00973  |
| 1312 | PE | PV | 100 µM | 333 | 355 | EALPmDTEVYESPADPEEIRPK  | m5: Oxidation (+15.99), y14: Phospho (+79.97)                        | 99.70% | 1.26 | 18.5 | 3.6  | 3 | 925.74 | 2,774.20 | -0.00228 |
| 1313 | PE | PV | 100 µM | 333 | 355 | EALPMDTEVYESPADPEEIRPK  | y14: Phospho (+79.97)                                                | 99.70% | 4.02 | 39.4 | 9.39 | 3 | 920.41 | 2,758.22 | 0.00716  |
| 1314 | PE | PV | 100 µM | 333 | 355 | EALPmDTEVYEsPYADPEEIRPK | m5: Oxidation (+15.99), s12: Phospho (+79.97)                        | 99.70% | 3.93 | 60.8 | 9.74 | 3 | 925.74 | 2,774.21 | 0.00596  |
| 1315 | PE | PV | 100 µM | 333 | 355 | EALPmDTEVYESPADPEEIRPK  | m5: Oxidation (+15.99), y10: Phospho (+79.97), y14: Phospho (+79.97) | 90.90% | 2.14 | 0    | 2.43 | 3 | 952.41 | 2,854.21 | 0.04482  |
| 1316 | PE | PV | 100 µM | 333 | 355 | EALPmDTEVYESPADPEEIRPK  | m5: Oxidation (+15.99), y10: Phospho (+79.97), y14: Phospho (+79.97) | 97.50% | 1.87 | 0    | 2.72 | 3 | 952.41 | 2,854.21 | 0.03749  |
| 1317 | PE | PV | 100 µM | 333 | 355 | EALPmDTEVYEsPYADPEEIRPK | m5: Oxidation (+15.99), s12: Phospho (+79.97), y14: Phospho (+79.97) | 99.70% | 0    | 0    | 4.18 | 3 | 952.75 | 2,855.22 | 1.04600  |
| 1318 | PE | PV | 100 µM | 333 | 355 | EALPmDtEVYEsPYADPEEIRPK | m5: Oxidation (+15.99), t7: Phospho (+79.97), s12: Phospho (+79.97)  | 99.70% | 1.89 | 0    | 5.34 | 3 | 952.41 | 2,854.21 | 0.03768  |
| 1319 | PE | PV | 100 µM | 333 | 355 | EALPmDtEVYEsPYADPEEIRPK | m5: Oxidation (+15.99), t7: Phospho (+79.97), s12: Phospho (+79.97)  | 99.70% | 1.93 | 11.7 | 3.89 | 3 | 952.41 | 2,854.22 | 0.04738  |



|      |    |    |        |     |     |                         |                                                                      |        |      |      |      |   |        |          |         |
|------|----|----|--------|-----|-----|-------------------------|----------------------------------------------------------------------|--------|------|------|------|---|--------|----------|---------|
| 1320 | PE | PV | 100 µM | 333 | 355 | EALPmDTEVYESPyADPEEIRPK | m5: Oxidation (+15.99), y14: Phospho (+79.97)                        | 99.70% | 0    | 0    | 6.77 | 3 | 926.42 | 2,776.24 | 2.03300 |
| 1321 | PE | PV | 100 µM | 333 | 355 | EALPmDTEVYESPyADPEEIRPK | m5: Oxidation (+15.99), y14: Phospho (+79.97)                        | 99.70% | 0    | 0    | 7.14 | 3 | 926.09 | 2,775.24 | 1.03400 |
| 1322 | PE | PV | 100 µM | 333 | 355 | EALPmDTEVYESPyADPEEIRPK | m5: Oxidation (+15.99), y14: Phospho (+79.97)                        | 99.70% | 0    | 0    | 7    | 3 | 926.09 | 2,775.24 | 1.03600 |
| 1323 | PE | PV | 100 µM | 333 | 355 | EALPmDTEVYESPYADPEEIRPK | m5: Oxidation (+15.99), s12: Phospho (+79.97)                        | 99.70% | 0    | 0    | 7.74 | 3 | 926.09 | 2,775.24 | 1.04100 |
| 1324 | PE | PV | 100 µM | 333 | 355 | EALPMDTEVYESPYADPEEIRPK | s12: Phospho (+79.97)                                                | 99.70% | 2.27 | 14.3 | 6.74 | 3 | 920.42 | 2,758.25 | 0.04250 |
| 1325 | PE | PV | 100 µM | 333 | 355 | EALPmDTEVYESPyADPEEIRPK | m5: Oxidation (+15.99), y10: Phospho (+79.97), y14: Phospho (+79.97) | 99.70% | 2.7  | 20.2 | 5.96 | 3 | 952.41 | 2,854.22 | 0.04573 |
| 1326 | PE | PV | 100 µM | 333 | 355 | EALPmDTEVYESPyADPEEIRPK | m5: Oxidation (+15.99), y14: Phospho (+79.97)                        | 99.70% | 2.86 | 17.6 | 5.89 | 3 | 925.75 | 2,774.23 | 0.02867 |
| 1327 | PE | PV | 100 µM | 333 | 355 | EALPmDTEVYESPyADPEEIRPK | m5: Oxidation (+15.99), y10: Phospho (+79.97), y14: Phospho (+79.97) | 99.70% | 2.58 | 16.6 | 7.28 | 3 | 952.41 | 2,854.22 | 0.04720 |
| 1328 | PE | PV | 100 µM | 333 | 355 | EALPmDTEVYESPyADPEEIRPK | m5: Oxidation (+15.99), y14: Phospho (+79.97)                        | 99.70% | 0    | 0    | 10.2 | 3 | 926.09 | 2,775.24 | 1.03900 |
| 1329 | PE | PV | 100 µM | 333 | 355 | EALPmDTEVYESPYADPEEIRPK | m5: Oxidation (+15.99), y10: Phospho (+79.97)                        | 99.70% | 3.68 | 38   | 7.96 | 3 | 925.75 | 2,774.24 | 0.03819 |
| 1330 | PE | PV | 100 µM | 333 | 355 | EALPmDTEVYESPYADPEEIRPK | m5: Oxidation (+15.99), y10: Phospho (+79.97)                        | 99.70% | 3.91 | 35.5 | 8.13 | 3 | 925.75 | 2,774.24 | 0.03929 |
| 1331 | PE | PV | 100 µM | 333 | 355 | EALPmDTEVYESPyADPEEIRPK | m5: Oxidation (+15.99), y14: Phospho (+79.97)                        | 99.70% | 3.89 | 24   | 8.21 | 3 | 925.75 | 2,774.24 | 0.03691 |
| 1332 | PE | PV | 100 µM | 333 | 355 | EALPmDTEVYESPyADPEEIRPK | m5: Oxidation (+15.99), y14: Phospho (+79.97)                        | 99.70% | 3.96 | 29.9 | 8.25 | 3 | 925.75 | 2,774.24 | 0.03489 |
| 1333 | PE | PV | 100 µM | 333 | 355 | EALPmDTEVYESPyADPEEIRPK | m5: Oxidation (+15.99), y14: Phospho (+79.97)                        | 99.70% | 3.06 | 24.7 | 8.66 | 3 | 925.75 | 2,774.24 | 0.03361 |
| 1334 | PE | PV | 100 µM | 333 | 355 | EALPMDTEVYESPyADPEEIRPK | y10: Phospho (+79.97), y14: Phospho (+79.97)                         | 99.70% | 2.78 | 13.2 | 9.1  | 3 | 947.08 | 2,838.21 | 0.03796 |
| 1335 | PE | PV | 100 µM | 333 | 355 | EALPMDTEVYESPyADPEEIRPK | y10: Phospho (+79.97), y14: Phospho (+79.97)                         | 99.70% | 2.41 | 12.5 | 10.8 | 3 | 947.08 | 2,838.22 | 0.04126 |
| 1336 | PE | PV | 100 µM | 333 | 355 | EALPMDTEVYESPyADPEEIRPK | y14: Phospho (+79.97)                                                | 99.70% | 2.52 | 18   | 10.4 | 3 | 920.42 | 2,758.23 | 0.02144 |
| 1337 | PE | PV | 100 µM | 333 | 355 | EALPMDTEVYESPyADPEEIRPK | y10: Phospho (+79.97), y14: Phospho (+79.97)                         | 99.70% | 2.54 | 13.1 | 10   | 3 | 947.08 | 2,838.21 | 0.03393 |
| 1338 | PE | PV | 100 µM | 333 | 355 | EALPMDtEVYESPYADPEEIRPK | t7: Phospho (+79.97), s12: Phospho (+79.97)                          | 99.70% | 2.77 | 10.7 | 10.9 | 3 | 947.08 | 2,838.21 | 0.03924 |
| 1339 | PE | PV | 100 µM | 333 | 355 | EALPmDTEVYESPYADPEEIRPK | m5: Oxidation (+15.99), y10: Phospho (+79.97)                        | 99.70% | 2.48 | 28   | 9.47 | 3 | 925.75 | 2,774.24 | 0.03214 |
| 1340 | PE | PV | 100 µM | 333 | 355 | EALPMDTEVYESPyADPEEIRPK | y10: Phospho (+79.97), y14: Phospho (+79.97)                         | 99.70% | 2.89 | 13.4 | 10.1 | 3 | 947.08 | 2,838.21 | 0.03851 |
| 1341 | PE | PV | 100 µM | 333 | 355 | EALPMDTEVYESPyADPEEIRPK | y10: Phospho (+79.97), y14: Phospho (+79.97)                         | 99.70% | 2.95 | 12.3 | 11.3 | 3 | 947.08 | 2,838.21 | 0.03851 |

|      |    |    |        |     |     |                                      |                                               |        |      |      |      |   |        |          |          |
|------|----|----|--------|-----|-----|--------------------------------------|-----------------------------------------------|--------|------|------|------|---|--------|----------|----------|
| 1342 | PE | PV | 100 µM | 333 | 355 | EALPMDTEV <sub>y</sub> ESPyADPEEIRPK | y10: Phospho (+79.97), y14: Phospho (+79.97)  | 99.70% | 3.06 | 20.8 | 11.3 | 3 | 947.08 | 2,838.21 | 0.03924  |
| 1343 | PE | PV | 100 µM | 333 | 355 | EALPMDtEVYESPADPEEIRPK               | t7: Phospho (+79.97)                          | 99.70% | 3.03 | 44.4 | 11.9 | 3 | 920.42 | 2,758.25 | 0.04177  |
| 1344 | PE | PV | 100 µM | 333 | 355 | EALPMDTEV <sub>y</sub> ESPyADPEEIRPK | y10: Phospho (+79.97), y14: Phospho (+79.97)  | 99.70% | 3.22 | 28.1 | 11.4 | 3 | 947.08 | 2,838.21 | 0.03760  |
| 1345 | PE | PV | 100 µM | 333 | 355 | EALPMDTEV <sub>y</sub> ESPYADPEEIRPK | y10: Phospho (+79.97)                         | 99.70% | 3.07 | 51.2 | 11.4 | 3 | 920.42 | 2,758.24 | 0.03390  |
| 1346 | PE | PV | 100 µM | 333 | 355 | EALPMDTEV <sub>y</sub> ESPYADPEEIRPK | y10: Phospho (+79.97)                         | 99.70% | 3.17 | 56.8 | 10.8 | 3 | 920.42 | 2,758.24 | 0.03536  |
| 1347 | PE | PV | 100 µM | 333 | 355 | EALPmDTEVYESPyADPEEIRPK              | m5: Oxidation (+15.99), y14: Phospho (+79.97) | 99.70% | 3.87 | 28.6 | 10.4 | 3 | 925.75 | 2,774.24 | 0.03453  |
| 1348 | PE | PV | 100 µM | 333 | 355 | EALPMDTEV <sub>y</sub> ESPYADPEEIRPK | y10: Phospho (+79.97)                         | 99.70% | 2.96 | 44.5 | 12.7 | 3 | 920.42 | 2,758.24 | 0.03536  |
| 1349 | PE | PV | 100 µM | 333 | 355 | EALPMDTEV <sub>y</sub> ESPYADPEEIRPK | y10: Phospho (+79.97)                         | 99.70% | 3.44 | 56.9 | 13.1 | 3 | 920.42 | 2,758.25 | 0.04195  |
| 1350 | PE | PV | 100 µM | 333 | 355 | EALPMDTEV <sub>y</sub> ESPYADPEEIRPK | y10: Phospho (+79.97)                         | 99.70% | 3.35 | 44.5 | 12.4 | 3 | 920.42 | 2,758.25 | 0.03829  |
| 1351 | PE | PV | 100 µM | 333 | 355 | EALPMDTEV <sub>y</sub> ESPYADPEEIRPK | y10: Phospho (+79.97)                         | 99.70% | 3.44 | 57.3 | 12.2 | 3 | 920.42 | 2,758.24 | 0.03408  |
| 1352 | PE | PV | 100 µM | 333 | 355 | EALPmDTEV <sub>y</sub> ESPYADPEEIRPK | m5: Oxidation (+15.99), y10: Phospho (+79.97) | 99.70% | 3.45 | 40.6 | 10.1 | 3 | 925.75 | 2,774.24 | 0.03581  |
| 1353 | PE | PV | 100 µM | 333 | 355 | EALPmDTEV <sub>y</sub> ESPYADPEEIRPK | m5: Oxidation (+15.99), y10: Phospho (+79.97) | 99.70% | 3.57 | 56.6 | 9.4  | 3 | 925.75 | 2,774.24 | 0.03654  |
| 1354 | PE | PV | 100 µM | 333 | 355 | EALPMDTEVYESPADPEEIRPK               | y14: Phospho (+79.97)                         | 99.70% | 2.67 | 41.1 | 4    | 3 | 920.41 | 2,758.21 | 0.00588  |
| 1355 | PE | PV | 100 µM | 333 | 355 | EALPmDTEV <sub>y</sub> ESPYADPEEIRPK | m5: Oxidation (+15.99), y10: Phospho (+79.97) | 99.70% | 2.48 | 33.2 | 7.72 | 3 | 925.74 | 2,774.20 | -0.00576 |
| 1356 | PE | Hg | 100 µM | 356 | 361 | EVyLDR                               | y3: Phospho (+79.97)                          | 90.00% | 1.85 | 28   | 1.68 | 2 | 437.69 | 873.363  | -0.00039 |
| 1357 | PE | Hg | 100 µM | 356 | 361 | EVyLDR                               | y3: Phospho (+79.97)                          | 90.00% | 1.59 | 23.4 | 2.04 | 2 | 437.70 | 873.377  | 0.01316  |
| 1358 | PE | Hg | 100 µM | 493 | 503 | NVLLVTQH <sub>y</sub> AK             | y9: Phospho (+79.97)                          | 99.70% | 2.97 | 25.2 | 2.51 | 2 | 683.35 | 1,364.69 | 0.00427  |
| 1359 | IP | PV | 0      | 512 | 521 | ALRADEN <sub>y</sub> yK              | y9: Phospho (+79.97)                          | 99.60% | 2.18 | 20.8 | 2.66 | 2 | 661.79 | 1,321.57 | 0.00172  |
| 1360 | PE | Ig | NT     | 512 | 521 | ALRADEN <sub>y</sub> YK              | y8: Phospho (+79.97)                          | 83.10% | 1.25 | 40.3 | 0    | 2 | 661.79 | 1,321.57 | 0.00220  |
| 1361 | PE | Ig | NT     | 512 | 521 | ALRADEN <sub>y</sub> yK              | y8: Phospho (+79.97), y9: Phospho (+79.97)    | 97.80% | 0.87 | 12.5 | 0    | 2 | 701.78 | 1,401.54 | 0.00218  |
| 1362 | PE | Ig | 1 min  | 512 | 521 | ALRADEN <sub>y</sub> YK              | y8: Phospho (+79.97)                          | 95.90% | 2.83 | 30.1 | 0    | 2 | 661.79 | 1,321.57 | 0.00159  |
| 1363 | PE | Ig | 1 min  | 512 | 521 | ALRADEN <sub>y</sub> yK              | y9: Phospho (+79.97)                          | 92.30% | 0.65 | 18   | 0    | 2 | 661.79 | 1,321.57 | 0.00233  |
| 1364 | PE | Ig | 1 min  | 512 | 521 | ALRADEN <sub>y</sub> yK              | y9: Phospho (+79.97)                          | 97.90% | 1.03 | 12.9 | 0    | 2 | 661.79 | 1,321.57 | 0.00135  |
| 1365 | PE | Ig | 1 min  | 512 | 521 | ALRADEN <sub>y</sub> YK              | y8: Phospho (+79.97)                          | 99.70% | 1.66 | 16.2 | 0    | 3 | 441.53 | 1,321.58 | 0.00509  |
| 1366 | PE | Ig | 1 min  | 512 | 521 | ALRADEN <sub>y</sub> yK              | y8: Phospho (+79.97), y9: Phospho (+79.97)    | 99.70% | 1.07 | 29.8 | 0    | 2 | 701.78 | 1,401.54 | 0.00133  |
| 1367 | PE | Ig | 2 min  | 512 | 521 | ALRADEN <sub>y</sub> YK              | y8: Phospho (+79.97)                          | 99.60% | 1.76 | 42.9 | 0    | 2 | 661.79 | 1,321.57 | 0.00220  |
| 1368 | PE | Ig | 2 min  | 512 | 521 | ALRADEN <sub>y</sub> yK              | y8: Phospho (+79.97), y9: Phospho (+79.97)    | 99.70% | 1.51 | 27.8 | 0    | 2 | 701.78 | 1,401.54 | 0.00157  |
| 1369 | PE | Ig | 2 min  | 512 | 521 | ALRADEN <sub>y</sub> YK              | y8: Phospho (+79.97)                          | 99.70% | 2    | 18.5 | 0    | 3 | 441.53 | 1,321.57 | 0.00317  |
| 1370 | PE | Ig | 3 min  | 512 | 521 | ALRADEN <sub>y</sub> YK              | y8: Phospho (+79.97)                          | 95.40% | 2.13 | 11.3 | 0    | 3 | 441.53 | 1,321.57 | 0.00060  |
| 1371 | PE | Ig | 3 min  | 512 | 521 | ALRADEN <sub>y</sub> yK              | y9: Phospho (+79.97)                          | 97.80% | 0.7  | 20.9 | 0    | 2 | 661.79 | 1,321.57 | -0.00048 |
| 1372 | PE | Ig | 3 min  | 512 | 521 | ALRADEN <sub>y</sub> yK              | y8: Phospho (+79.97), y9: Phospho (+79.97)    | 99.70% | 1.28 | 33.3 | 0    | 2 | 701.78 | 1,401.54 | 0.00035  |
| 1373 | PE | Ig | 3 min  | 512 | 521 | ALRADEN <sub>y</sub> YK              | y8: Phospho (+79.97)                          | 99.70% | 2.33 | 44.6 | 0    | 2 | 661.79 | 1,321.57 | 0.00111  |
| 1374 | PE | Ig | 5 min  | 512 | 521 | ALRADEN <sub>y</sub> YK              | y8: Phospho (+79.97)                          | 98.50% | 1.13 | 12.5 | 0    | 3 | 441.53 | 1,321.57 | -0.00123 |
| 1375 | PE | Ig | 5 min  | 512 | 521 | ALRADEN <sub>y</sub> yK              | y8: Phospho (+79.97), y9: Phospho (+79.97)    | 88.60% | 0.5  | 0    | 0    | 2 | 701.78 | 1,401.54 | 0.00572  |

|      |    |    |        |     |     |            |                                            |        |      |      |      |   |        |          |          |
|------|----|----|--------|-----|-----|------------|--------------------------------------------|--------|------|------|------|---|--------|----------|----------|
| 1376 | PE | Ig | 5 min  | 512 | 521 | ALRADENyYK | y8: Phospho (+79.97)                       | 97.40% | 1.46 | 38.6 | 0    | 2 | 661.79 | 1,321.57 | 0.00062  |
| 1377 | PE | Ig | 5 min  | 512 | 521 | ALRADENyYK | y8: Phospho (+79.97)                       | 99.70% | 2.22 | 16.9 | 0    | 3 | 441.53 | 1,321.57 | 0.00408  |
| 1378 | PE | Ig | 15 min | 512 | 521 | ALRADENyYK | y8: Phospho (+79.97)                       | 97.00% | 0.7  | 13.4 | 0    | 2 | 661.79 | 1,321.57 | 0.00123  |
| 1379 | PE | Ig | 15 min | 512 | 521 | ALRADENyYK | y8: Phospho (+79.97)                       | 99.60% | 2.33 | 43.2 | 0    | 2 | 661.79 | 1,321.57 | 0.00220  |
| 1380 | PE | Ig | 15 min | 512 | 521 | ALRADENyyK | y8: Phospho (+79.97), y9: Phospho (+79.97) | 99.70% | 2.11 | 32.4 | 0    | 2 | 701.78 | 1,401.54 | 0.00182  |
| 1381 | PE | Hg | 0      | 512 | 521 | ALRADENYyK | y9: Phospho (+79.97)                       | 98.40% | 1.86 | 0    | 2.24 | 2 | 661.79 | 1,321.58 | 0.00477  |
| 1382 | PE | Hg | 0      | 512 | 521 | ALRADENyYK | y8: Phospho (+79.97)                       | 99.70% | 1.57 | 30.1 | 3.48 | 2 | 661.79 | 1,321.57 | -0.00439 |
| 1383 | PE | Hg | 0      | 512 | 521 | ALRADENyyK | y8: Phospho (+79.97), y9: Phospho (+79.97) | 81.70% | 0.49 | 0    | 0    | 2 | 701.78 | 1,401.54 | 0.00450  |
| 1384 | PE | Hg | 1 µM   | 512 | 521 | ALRADENyYK | y8: Phospho (+79.97)                       | 99.70% | 1.17 | 14.2 | 2.4  | 3 | 441.53 | 1,321.58 | 0.00500  |
| 1385 | PE | Hg | 1 µM   | 512 | 521 | ALRADENyyK | y8: Phospho (+79.97), y9: Phospho (+79.97) | 99.70% | 1.47 | 30.6 | 2.07 | 2 | 701.78 | 1,401.54 | 0.00267  |
| 1386 | PE | Hg | 5 µM   | 512 | 521 | ALRADENYyK | y9: Phospho (+79.97)                       | 99.70% | 2.96 | 19.2 | 4.27 | 2 | 661.79 | 1,321.57 | 0.00233  |
| 1387 | PE | Hg | 5 µM   | 512 | 521 | ALRADENyYK | y8: Phospho (+79.97)                       | 95.60% | 0.91 | 17.3 | 0    | 2 | 661.79 | 1,321.57 | -0.00036 |
| 1388 | PE | Hg | 5 µM   | 512 | 521 | ALRADENyyK | y8: Phospho (+79.97), y9: Phospho (+79.97) | 99.70% | 1.81 | 41.4 | 7.66 | 2 | 701.78 | 1,401.54 | 0.00145  |
| 1389 | PE | Hg | 10 µM  | 512 | 521 | ALRADENYyK | y9: Phospho (+79.97)                       | 99.00% | 1.72 | 0    | 2.54 | 2 | 661.80 | 1,321.58 | 0.00733  |
| 1390 | PE | Hg | 10 µM  | 512 | 521 | ALRADENyYK | y8: Phospho (+79.97)                       | 99.70% | 2.56 | 30.8 | 2.12 | 2 | 661.79 | 1,321.57 | 0.00281  |
| 1391 | PE | Hg | 10 µM  | 512 | 521 | ALRADENYyK | y9: Phospho (+79.97)                       | 99.70% | 0.67 | 18.4 | 0    | 2 | 661.79 | 1,321.56 | -0.00707 |
| 1392 | PE | Hg | 10 µM  | 512 | 521 | ALRADENYyK | y9: Phospho (+79.97)                       | 96.10% | 0.5  | 11.7 | 0    | 2 | 661.79 | 1,321.57 | 0.00281  |
| 1393 | PE | Hg | 10 µM  | 512 | 521 | ALRADENyYK | y8: Phospho (+79.97)                       | 98.70% | 0.69 | 13.5 | 0.27 | 2 | 661.80 | 1,321.58 | 0.00587  |
| 1394 | PE | Hg | 10 µM  | 512 | 521 | ALRADENyYK | y8: Phospho (+79.97)                       | 99.70% | 1.51 | 11.2 | 3.15 | 3 | 441.53 | 1,321.58 | 0.00665  |
| 1395 | PE | Hg | 10 µM  | 512 | 521 | ALRADENyyK | y8: Phospho (+79.97), y9: Phospho (+79.97) | 99.70% | 1.15 | 18.2 | 2.8  | 2 | 701.78 | 1,401.54 | 0.00352  |
| 1396 | PE | Hg | 20 µM  | 512 | 521 | ALRADENyYK | y8: Phospho (+79.97)                       | 99.70% | 1.14 | 0    | 1.06 | 3 | 441.53 | 1,321.57 | 0.00097  |
| 1397 | PE | Hg | 20 µM  | 512 | 521 | ALRADENyYK | y8: Phospho (+79.97)                       | 99.70% | 1.39 | 12.4 | 1.22 | 3 | 441.53 | 1,321.57 | 0.00308  |
| 1398 | PE | Hg | 20 µM  | 512 | 521 | ALRADENyYK | y8: Phospho (+79.97)                       | 99.70% | 1.53 | 26.7 | 1.92 | 2 | 661.79 | 1,321.57 | 0.00306  |
| 1399 | PE | Hg | 20 µM  | 512 | 521 | ALRADENyyK | y8: Phospho (+79.97), y9: Phospho (+79.97) | 99.70% | 1.29 | 25   | 2.14 | 2 | 701.78 | 1,401.54 | 0.00084  |
| 1400 | PE | Hg | 50 µM  | 512 | 521 | ALRADENyYK | y8: Phospho (+79.97)                       | 99.70% | 2.95 | 14.6 | 0.82 | 3 | 441.53 | 1,321.57 | 0.00198  |
| 1401 | PE | Hg | 50 µM  | 512 | 521 | ALRADENyYK | y8: Phospho (+79.97)                       | 99.70% | 2.7  | 25.1 | 2.74 | 2 | 661.79 | 1,321.57 | 0.00294  |
| 1402 | PE | Hg | 50 µM  | 512 | 521 | ALRADENyYK | y8: Phospho (+79.97)                       | 99.70% | 1.32 | 24.8 | 2.06 | 2 | 661.79 | 1,321.57 | 0.00001  |
| 1403 | PE | Hg | 50 µM  | 512 | 521 | ALRADENyYK | y8: Phospho (+79.97)                       | 99.70% | 1.4  | 13.5 | 1.3  | 3 | 441.53 | 1,321.57 | -0.00040 |
| 1404 | PE | Hg | 50 µM  | 512 | 521 | ALRADENyYK | y8: Phospho (+79.97)                       | 99.70% | 1.64 | 38.1 | 4.74 | 2 | 661.79 | 1,321.57 | 0.00428  |
| 1405 | PE | Hg | 50 µM  | 512 | 521 | ALRADENyyK | y8: Phospho (+79.97), y9: Phospho (+79.97) | 99.70% | 1.27 | 31.4 | 2.8  | 2 | 701.78 | 1,401.54 | 0.00780  |
| 1406 | PE | Hg | 50 µM  | 512 | 521 | ALRADENyYK | y8: Phospho (+79.97)                       | 99.70% | 1.65 | 25.3 | 4.57 | 3 | 441.53 | 1,321.58 | 0.00610  |
| 1407 | PE | Hg | 100 µM | 512 | 521 | ALRADENYyK | y9: Phospho (+79.97)                       | 99.70% | 2.57 | 21   | 1.92 | 2 | 661.80 | 1,321.58 | 0.00867  |
| 1408 | PE | Hg | 100 µM | 512 | 521 | ALRADENYyK | y9: Phospho (+79.97)                       | 99.70% | 2.83 | 28.5 | 4.19 | 2 | 661.79 | 1,321.57 | 0.00123  |
| 1409 | PE | Hg | 100 µM | 512 | 521 | ALRADENyYK | y8: Phospho (+79.97)                       | 99.70% | 2.19 | 34.4 | 5.04 | 2 | 661.79 | 1,321.57 | -0.00317 |
| 1410 | PE | Hg | 100 µM | 512 | 521 | ALRADENyYK | y8: Phospho (+79.97)                       | 99.70% | 2.79 | 20.1 | 5.39 | 3 | 441.53 | 1,321.57 | -0.00324 |
| 1411 | PE | Hg | 100 µM | 512 | 521 | ALRADENyYK | y8: Phospho (+79.97)                       | 99.70% | 1.72 | 48.4 | 7.38 | 2 | 661.79 | 1,321.57 | 0.00196  |
| 1412 | PE | Hg | 100 µM | 512 | 521 | ALRADENyyK | y8: Phospho (+79.97), y9: Phospho (+79.97) | 99.70% | 1.29 | 29.3 | 4.51 | 2 | 701.78 | 1,401.54 | 0.00499  |

|      |    |    |       |     |     |            |                                            |        |      |      |      |   |        |          |          |
|------|----|----|-------|-----|-----|------------|--------------------------------------------|--------|------|------|------|---|--------|----------|----------|
| 1413 | PE | PV | 0     | 512 | 521 | ALRADENyYK | y8: Phospho (+79.97)                       | 99.70% | 2.08 | 16.6 | 2.55 | 2 | 661.79 | 1,321.58 | 0.00477  |
| 1414 | PE | PV | 0     | 512 | 521 | ALRADENyyK | y8: Phospho (+79.97), y9: Phospho (+79.97) | 99.70% | 1.09 | 25.3 | 1.16 | 2 | 701.78 | 1,401.54 | 0.00499  |
| 1415 | PE | PV | 0     | 512 | 521 | ALRADENyYK | y8: Phospho (+79.97)                       | 99.70% | 1.64 | 47.2 | 4.66 | 2 | 661.79 | 1,321.57 | 0.00257  |
| 1416 | PE | PV |       | 512 | 521 | ALRADENyYK | y8: Phospho (+79.97)                       | 99.70% | 1.77 | 19.5 | 3.05 | 3 | 441.53 | 1,321.57 | -0.00077 |
| 1417 | PE | PV | 1 µM  | 512 | 521 | ALRADENyyK | y8: Phospho (+79.97), y9: Phospho (+79.97) | 99.70% | 1.19 | 22.7 | 2.89 | 2 | 701.78 | 1,401.54 | 0.00352  |
| 1418 | PE | PV | 3 µM  | 512 | 521 | ALRADENyYK | y8: Phospho (+79.97)                       | 99.70% | 1.27 | 17.2 | 1.25 | 3 | 441.53 | 1,321.57 | -0.00205 |
| 1419 | PE | PV | 3 µM  | 512 | 521 | ALRADENyyK | y8: Phospho (+79.97), y9: Phospho (+79.97) | 99.70% | 1.45 | 18.6 | 1.62 | 2 | 701.78 | 1,401.54 | 0.00304  |
| 1420 | PE | PV | 10 µM | 512 | 521 | ALRADENyYK | y8: Phospho (+79.97)                       | 99.70% | 2.74 | 23.4 | 0.82 | 3 | 441.53 | 1,321.57 | 0.00298  |
| 1421 | PE | PV | 10 µM | 512 | 521 | ALRADENYyK | y9: Phospho (+79.97)                       | 99.70% | 2.03 | 0    | 3.47 | 2 | 661.79 | 1,321.57 | 0.00159  |
| 1422 | PE | PV | 10 µM | 512 | 521 | ALRADENyYK | y8: Phospho (+79.97)                       | 99.70% | 3.09 | 29.1 | 2.19 | 2 | 661.79 | 1,321.57 | 0.00269  |
| 1423 | PE | PV | 10 µM | 512 | 521 | ALRADENyYK | y8: Phospho (+79.97)                       | 99.70% | 2.34 | 31.1 | 5.02 | 2 | 661.79 | 1,321.57 | 0.00135  |
| 1424 | PE | PV | 10 µM | 512 | 521 | ALRADENyYK | y8: Phospho (+79.97)                       | 99.70% | 2.71 | 31.5 | 8.12 | 2 | 661.79 | 1,321.57 | 0.00172  |
| 1425 | PE | PV | 10 µM | 512 | 521 | ALRADENyYK | y8: Phospho (+79.97)                       | 88.10% | 1.27 | 20.2 | 0    | 2 | 661.79 | 1,321.57 | 0.00147  |
| 1426 | PE | PV | 10 µM | 512 | 521 | ALRADENyyK | y8: Phospho (+79.97), y9: Phospho (+79.97) | 98.70% | 0.94 | 11.9 | 0    | 3 | 468.19 | 1,401.54 | -0.00018 |
| 1427 | PE | PV | 10 µM | 512 | 521 | ALRADENYyK | y9: Phospho (+79.97)                       | 99.70% | 1.35 | 31.5 | 2.51 | 2 | 661.79 | 1,321.57 | -0.00121 |
| 1428 | PE | PV | 10 µM | 512 | 521 | ALRADENyYK | y8: Phospho (+79.97)                       | 99.70% | 2.89 | 37.3 | 9.66 | 2 | 661.79 | 1,321.57 | -0.00390 |
| 1429 | PE | PV | 10 µM | 512 | 521 | ALRADENyYK | y8: Phospho (+79.97)                       | 99.70% | 3.02 | 17.3 | 5.09 | 3 | 441.53 | 1,321.57 | -0.00306 |
| 1430 | PE | PV | 10 µM | 512 | 521 | ALRADENyyK | y8: Phospho (+79.97), y9: Phospho (+79.97) | 99.70% | 2.33 | 25.3 | 4.03 | 2 | 701.78 | 1,401.54 | 0.00328  |
| 1431 | PE | PV | 10 µM | 512 | 521 | ALRADENyYK | y8: Phospho (+79.97)                       | 99.70% | 2.81 | 26   | 5.04 | 2 | 661.79 | 1,321.57 | 0.00111  |
| 1432 | PE | PV | 10 µM | 512 | 521 | ALRADENyYK | y8: Phospho (+79.97)                       | 99.70% | 2.48 | 31   | 5.51 | 2 | 661.79 | 1,321.57 | 0.00135  |
| 1433 | PE | PV | 10 µM | 512 | 521 | ALRADENyyK | y8: Phospho (+79.97), y9: Phospho (+79.97) | 99.70% | 2.7  | 33.1 | 6.48 | 2 | 701.78 | 1,401.54 | -0.00087 |
| 1434 | PE | PV | 10 µM | 512 | 521 | ALRADENyYK | y8: Phospho (+79.97)                       | 99.70% | 1.55 | 37.5 | 4.8  | 2 | 661.79 | 1,321.57 | 0.00208  |
| 1435 | PE | PV | 10 µM | 512 | 521 | ALRADENYyK | y9: Phospho (+79.97)                       | 99.70% | 1.67 | 40.5 | 5.15 | 2 | 661.79 | 1,321.57 | 0.00184  |
| 1436 | PE | PV | 10 µM | 512 | 521 | ALRADENyyK | y8: Phospho (+79.97), y9: Phospho (+79.97) | 99.70% | 1.87 | 35.4 | 5.66 | 2 | 701.78 | 1,401.54 | 0.00218  |
| 1437 | PE | PV | 10 µM | 512 | 521 | ALRADENyYK | y8: Phospho (+79.97)                       | 99.70% | 3.13 | 37.4 | 9.54 | 2 | 661.79 | 1,321.57 | 0.00245  |
| 1438 | PE | PV | 10 µM | 512 | 521 | ALRADENyYK | y8: Phospho (+79.97)                       | 99.70% | 2    | 22.4 | 3.14 | 3 | 441.53 | 1,321.57 | 0.00390  |
| 1439 | PE | PV | 10 µM | 512 | 521 | ALRADENyYK | y8: Phospho (+79.97)                       | 99.70% | 2.64 | 28.6 | 6.16 | 3 | 441.53 | 1,321.58 | 0.00738  |
| 1440 | PE | PV | 10 µM | 512 | 521 | ALRADENyYK | y8: Phospho (+79.97)                       | 99.70% | 2.29 | 23.3 | 6.04 | 2 | 661.79 | 1,321.57 | 0.00037  |
| 1441 | PE | PV | 30 µM | 512 | 521 | ALRADENyYK | y8: Phospho (+79.97)                       | 99.40% | 2.43 | 22.8 | 0.44 | 3 | 441.53 | 1,321.57 | 0.00363  |
| 1442 | PE | PV | 30 µM | 512 | 521 | ALRADENYyK | y9: Phospho (+79.97)                       | 99.50% | 2.4  | 19.5 | 0.85 | 2 | 661.79 | 1,321.57 | 0.00294  |
| 1443 | PE | PV | 30 µM | 512 | 521 | ALRADENyYK | y8: Phospho (+79.97)                       | 99.70% | 2.33 | 12.4 | 1.28 | 2 | 661.79 | 1,321.57 | 0.00013  |
| 1444 | PE | PV | 30 µM | 512 | 521 | ALRADENyYK | y8: Phospho (+79.97)                       | 99.70% | 2.17 | 0    | 1.32 | 3 | 441.53 | 1,321.57 | 0.00189  |
| 1445 | PE | PV | 30 µM | 512 | 521 | ALRADENYyK | y9: Phospho (+79.97)                       | 99.70% | 2    | 12.7 | 2.62 | 2 | 661.80 | 1,321.58 | 0.00709  |
| 1446 | PE | PV | 30 µM | 512 | 521 | ALRADENyYK | y8: Phospho (+79.97)                       | 99.70% | 2.2  | 22.2 | 2.51 | 2 | 661.79 | 1,321.57 | 0.00257  |
| 1447 | PE | PV | 30 µM | 512 | 521 | ALRADENYyK | y9: Phospho (+79.97)                       | 99.70% | 2.37 | 15.3 | 2.92 | 2 | 661.79 | 1,321.57 | 0.00001  |
| 1448 | PE | PV | 30 µM | 512 | 521 | ALRADENyYK | y8: Phospho (+79.97)                       | 99.70% | 3.06 | 13.3 | 1.66 | 3 | 441.53 | 1,321.57 | -0.00040 |
| 1449 | PE | PV | 30 µM | 512 | 521 | ALRADENyYK | y8: Phospho (+79.97)                       | 99.00% | 1.97 | 19.5 | 2.06 | 2 | 661.79 | 1,321.57 | 0.00269  |

|      |    |    |       |     |     |            |                                            |        |      |      |      |   |        |          |          |
|------|----|----|-------|-----|-----|------------|--------------------------------------------|--------|------|------|------|---|--------|----------|----------|
| 1450 | PE | PV | 30 µM | 512 | 521 | ALRADENyyK | y8: Phospho (+79.97), y9: Phospho (+79.97) | 99.60% | 1.52 | 13.8 | 1.4  | 3 | 468.19 | 1,401.54 | -0.00018 |
| 1451 | PE | PV | 30 µM | 512 | 521 | ALRADENyYk | y9: Phospho (+79.97)                       | 99.70% | 1.6  | 24.1 | 2.72 | 3 | 441.53 | 1,321.57 | 0.00060  |
| 1452 | PE | PV | 30 µM | 512 | 521 | ALRADENyYk | y9: Phospho (+79.97)                       | 99.70% | 3.01 | 29   | 5    | 2 | 661.79 | 1,321.57 | -0.00109 |
| 1453 | PE | PV | 30 µM | 512 | 521 | ALRADENyYK | y8: Phospho (+79.97)                       | 99.70% | 2.4  | 29.4 | 5.44 | 2 | 661.79 | 1,321.57 | -0.00036 |
| 1454 | PE | PV | 30 µM | 512 | 521 | ALRADENyYk | y9: Phospho (+79.97)                       | 99.70% | 3.08 | 29.5 | 6.21 | 2 | 661.79 | 1,321.57 | -0.00158 |
| 1455 | PE | PV | 30 µM | 512 | 521 | ALRADENyYK | y8: Phospho (+79.97)                       | 99.70% | 2.75 | 27.6 | 7.8  | 2 | 661.79 | 1,321.57 | 0.00404  |
| 1456 | PE | PV | 30 µM | 512 | 521 | ALRADENyyK | y8: Phospho (+79.97), y9: Phospho (+79.97) | 99.70% | 2.97 | 26.7 | 5.4  | 2 | 701.78 | 1,401.54 | -0.00063 |
| 1457 | PE | PV | 30 µM | 512 | 521 | ALRADENyYK | y8: Phospho (+79.97)                       | 99.70% | 3.19 | 33.5 | 7.51 | 2 | 661.79 | 1,321.57 | -0.00195 |
| 1458 | PE | PV | 30 µM | 512 | 521 | ALRADENyyK | y8: Phospho (+79.97), y9: Phospho (+79.97) | 99.70% | 3.29 | 32.4 | 10.7 | 2 | 701.77 | 1,401.53 | -0.00368 |
| 1459 | PE | PV | 30 µM | 512 | 521 | ALRADENyyK | y8: Phospho (+79.97), y9: Phospho (+79.97) | 99.70% | 3.32 | 27.7 | 5.51 | 2 | 701.78 | 1,401.54 | -0.00014 |
| 1460 | PE | PV | 30 µM | 512 | 521 | ALRADENyyK | y8: Phospho (+79.97), y9: Phospho (+79.97) | 82.40% | 0.96 | 10.1 | 0    | 3 | 468.19 | 1,401.54 | 0.00064  |
| 1461 | PE | PV | 30 µM | 512 | 521 | ALRADENyyK | y8: Phospho (+79.97), y9: Phospho (+79.97) | 99.70% | 1.19 | 16.4 | 2.6  | 2 | 701.78 | 1,401.54 | 0.00108  |
| 1462 | PE | PV | 30 µM | 512 | 521 | ALRADENyyK | y8: Phospho (+79.97), y9: Phospho (+79.97) | 99.70% | 1.34 | 17.9 | 1.33 | 3 | 468.19 | 1,401.54 | -0.00055 |
| 1463 | PE | PV | 30 µM | 512 | 521 | ALRADENyYk | y9: Phospho (+79.97)                       | 99.70% | 1.41 | 30.7 | 3.92 | 2 | 661.79 | 1,321.57 | 0.00098  |
| 1464 | PE | PV | 30 µM | 512 | 521 | ALRADENyyK | y8: Phospho (+79.97), y9: Phospho (+79.97) | 99.70% | 1.8  | 23.4 | 6    | 2 | 701.78 | 1,401.54 | 0.00121  |
| 1465 | PE | PV | 30 µM | 512 | 521 | ALRADENyYK | y8: Phospho (+79.97)                       | 99.70% | 2.39 | 42.3 | 10.6 | 2 | 661.79 | 1,321.57 | -0.00329 |
| 1466 | PE | PV | 30 µM | 512 | 521 | ALRADENyYk | y9: Phospho (+79.97)                       | 99.70% | 2.01 | 23.2 | 3.51 | 3 | 441.53 | 1,321.57 | 0.00033  |
| 1467 | PE | PV | 30 µM | 512 | 521 | ALRADENyYK | y8: Phospho (+79.97)                       | 99.70% | 2.88 | 21.6 | 5.48 | 3 | 441.53 | 1,321.57 | -0.00233 |
| 1468 | PE | PV | 30 µM | 512 | 521 | ALRADENyyK | y8: Phospho (+79.97), y9: Phospho (+79.97) | 99.70% | 2.77 | 20.2 | 4.33 | 2 | 701.78 | 1,401.54 | -0.00014 |
| 1469 | PE | PV | 30 µM | 512 | 521 | ALRADENyYK | y8: Phospho (+79.97)                       | 99.70% | 2.89 | 24.5 | 4.85 | 2 | 661.79 | 1,321.57 | 0.00123  |
| 1470 | PE | PV | 30 µM | 512 | 521 | ALRADENyYK | y8: Phospho (+79.97)                       | 99.70% | 3.31 | 31.4 | 4.82 | 2 | 661.79 | 1,321.57 | 0.00159  |
| 1471 | PE | PV | 30 µM | 512 | 521 | ALRADENyYK | y8: Phospho (+79.97)                       | 99.70% | 3.32 | 15.2 | 3.96 | 3 | 441.53 | 1,321.57 | 0.00125  |
| 1472 | PE | PV | 30 µM | 512 | 521 | ALRADENyyK | y8: Phospho (+79.97), y9: Phospho (+79.97) | 99.70% | 1.11 | 21.2 | 1.96 | 2 | 701.78 | 1,401.54 | 0.00377  |
| 1473 | PE | PV | 30 µM | 512 | 521 | ALRADENyYK | y8: Phospho (+79.97)                       | 99.70% | 1.57 | 30.8 | 5.68 | 2 | 661.79 | 1,321.57 | 0.00281  |
| 1474 | PE | PV | 30 µM | 512 | 521 | ALRADENyYK | y8: Phospho (+79.97)                       | 99.70% | 2.09 | 33.1 | 8.03 | 2 | 661.79 | 1,321.57 | 0.00330  |
| 1475 | PE | PV | 30 µM | 512 | 521 | ALRADENyyK | y8: Phospho (+79.97), y9: Phospho (+79.97) | 99.70% | 2.04 | 36   | 9.24 | 2 | 701.78 | 1,401.54 | 0.00645  |
| 1476 | PE | PV | 30 µM | 512 | 521 | ALRADENyYK | y8: Phospho (+79.97)                       | 99.70% | 2.2  | 51.8 | 7.68 | 2 | 661.79 | 1,321.57 | 0.00123  |
| 1477 | PE | PV | 30 µM | 512 | 521 | ALRADENyYk | y9: Phospho (+79.97)                       | 99.70% | 2.9  | 40.8 | 10.4 | 2 | 661.79 | 1,321.57 | 0.00294  |
| 1478 | PE | PV | 30 µM | 512 | 521 | ALRADENyYk | y9: Phospho (+79.97)                       | 99.70% | 2.31 | 12.7 | 3.19 | 3 | 441.53 | 1,321.57 | 0.00216  |
| 1479 | PE | PV | 30 µM | 512 | 521 | ALRADENyYK | y8: Phospho (+79.97)                       | 99.70% | 2.35 | 19.1 | 4.85 | 3 | 441.53 | 1,321.57 | 0.00436  |
| 1480 | PE | PV | 30 µM | 512 | 521 | ALRADENyyK | y8: Phospho (+79.97), y9: Phospho (+79.97) | 99.70% | 2.81 | 22.7 | 6.46 | 3 | 468.19 | 1,401.54 | 0.00256  |
| 1481 | PE | PV | 30 µM | 512 | 521 | ALRADENyyK | y8: Phospho (+79.97), y9: Phospho (+79.97) | 99.70% | 2.15 | 18.4 | 2.74 | 2 | 701.78 | 1,401.56 | 0.01842  |

|      |    |    |        |     |     |            |                                            |        |      |      |      |   |        |          |          |
|------|----|----|--------|-----|-----|------------|--------------------------------------------|--------|------|------|------|---|--------|----------|----------|
| 1482 | PE | PV | 30 µM  | 512 | 521 | ALRADENyYK | y8: Phospho (+79.97)                       | 99.70% | 1.97 | 20.5 | 3.19 | 2 | 661.80 | 1,321.59 | 0.01966  |
| 1483 | PE | PV | 30 µM  | 512 | 521 | ALRADENyyK | y8: Phospho (+79.97), y9: Phospho (+79.97) | 99.70% | 2.14 | 35   | 5.42 | 2 | 701.79 | 1,401.56 | 0.02025  |
| 1484 | PE | PV | 30 µM  | 512 | 521 | ALRADENYyK | y9: Phospho (+79.97)                       | 99.70% | 1.52 | 22.1 | 1.23 | 2 | 661.79 | 1,321.57 | 0.00086  |
| 1485 | PE | PV | 30 µM  | 512 | 521 | ALRADENyYK | y8: Phospho (+79.97)                       | 99.70% | 1.68 | 37.3 | 6.72 | 2 | 661.79 | 1,321.57 | 0.00379  |
| 1486 | PE | PV | 30 µM  | 512 | 521 | ALRADENyYK | y8: Phospho (+79.97)                       | 99.70% | 2.31 | 12.5 | 4.77 | 3 | 441.53 | 1,321.57 | 0.00427  |
| 1487 | PE | PV | 100 µM | 512 | 521 | ALRADENyYK | y8: Phospho (+79.97)                       | 82.00% | 1.73 | 14.8 | 0    | 2 | 661.79 | 1,321.57 | 0.00208  |
| 1488 | PE | PV | 100 µM | 512 | 521 | ALRADENYyK | y9: Phospho (+79.97)                       | 98.70% | 2.29 | 14.4 | 0    | 3 | 441.53 | 1,321.57 | 0.00207  |
| 1489 | PE | PV | 100 µM | 512 | 521 | ALRADENYyK | y9: Phospho (+79.97)                       | 99.70% | 2.82 | 0    | 0.92 | 3 | 441.53 | 1,321.57 | 0.00189  |
| 1490 | PE | PV | 100 µM | 512 | 521 | ALRADENYyK | y9: Phospho (+79.97)                       | 99.70% | 1.96 | 20.1 | 2.01 | 2 | 661.79 | 1,321.57 | 0.00233  |
| 1491 | PE | PV | 100 µM | 512 | 521 | ALRADENyYK | y8: Phospho (+79.97)                       | 99.70% | 2.39 | 15.9 | 1.49 | 3 | 441.53 | 1,321.57 | 0.00005  |
| 1492 | PE | PV | 100 µM | 512 | 521 | ALRADENyYK | y8: Phospho (+79.97)                       | 99.70% | 2.48 | 33.7 | 3.44 | 2 | 661.79 | 1,321.57 | 0.00074  |
| 1493 | PE | PV | 100 µM | 512 | 521 | ALRADENyYK | y8: Phospho (+79.97)                       | 99.70% | 2.63 | 30.1 | 5.89 | 2 | 661.79 | 1,321.57 | 0.00386  |
| 1494 | PE | PV | 100 µM | 512 | 521 | ALRADENyYK | y8: Phospho (+79.97)                       | 99.70% | 2.61 | 36.1 | 6.18 | 2 | 661.79 | 1,321.57 | 0.00326  |
| 1495 | PE | PV | 100 µM | 512 | 521 | ALRADENYyK | y9: Phospho (+79.97)                       | 99.70% | 1.94 | 20.1 | 4.66 | 3 | 441.53 | 1,321.57 | 0.00033  |
| 1496 | PE | PV | 100 µM | 512 | 521 | ALRADENYyK | y9: Phospho (+79.97)                       | 99.70% | 2.74 | 31.6 | 6.32 | 2 | 661.79 | 1,321.57 | 0.00050  |
| 1497 | PE | PV | 100 µM | 512 | 521 | ALRADENyYK | y8: Phospho (+79.97)                       | 99.70% | 2.86 | 36   | 9.96 | 2 | 661.79 | 1,321.57 | 0.00276  |
| 1498 | PE | PV | 100 µM | 512 | 521 | ALRADENyyK | y8: Phospho (+79.97), y9: Phospho (+79.97) | 85.70% | 0.54 | 0    | 0    | 2 | 701.78 | 1,401.54 | -0.00002 |
| 1499 | PE | PV | 100 µM | 512 | 521 | ALRADENYyK | y9: Phospho (+79.97)                       | 99.70% | 1.08 | 20   | 1.19 | 2 | 661.79 | 1,321.57 | -0.00024 |
| 1500 | PE | PV | 100 µM | 512 | 521 | ALRADENyyK | y8: Phospho (+79.97), y9: Phospho (+79.97) | 99.70% | 1.69 | 46   | 5.32 | 2 | 701.78 | 1,401.54 | 0.00023  |
| 1501 | PE | PV | 100 µM | 512 | 521 | ALRADENyyK | y8: Phospho (+79.97), y9: Phospho (+79.97) | 99.70% | 1.41 | 13.4 | 0    | 3 | 468.19 | 1,401.54 | 0.00110  |
| 1502 | PE | PV | 100 µM | 512 | 521 | ALRADENYyK | y9: Phospho (+79.97)                       | 99.70% | 1.96 | 42.5 | 5.48 | 2 | 661.79 | 1,321.57 | -0.00341 |
| 1503 | PE | PV | 100 µM | 512 | 521 | ALRADENyYK | y8: Phospho (+79.97)                       | 99.70% | 2.77 | 20.6 | 5.02 | 3 | 441.53 | 1,321.57 | -0.00352 |
| 1504 | PE | PV | 100 µM | 512 | 521 | ALRADENYyK | y9: Phospho (+79.97)                       | 99.70% | 2.7  | 14.7 | 4.31 | 3 | 441.53 | 1,321.57 | 0.00152  |
| 1505 | PE | PV | 100 µM | 512 | 521 | ALRADENyYK | y8: Phospho (+79.97)                       | 99.70% | 2.88 | 19.3 | 5.11 | 3 | 441.53 | 1,321.57 | 0.00152  |
| 1506 | PE | PV | 100 µM | 512 | 521 | ALRADENYyK | y9: Phospho (+79.97)                       | 99.70% | 3.1  | 31.6 | 5.44 | 2 | 661.79 | 1,321.57 | 0.00098  |
| 1507 | PE | PV | 100 µM | 512 | 521 | ALRADENyyK | y8: Phospho (+79.97), y9: Phospho (+79.97) | 99.70% | 3.1  | 28   | 7.05 | 2 | 701.78 | 1,401.54 | 0.00218  |
| 1508 | PE | PV | 100 µM | 512 | 521 | ALRADENyYK | y8: Phospho (+79.97)                       | 99.10% | 0    | 12.6 | 0.8  | 2 | 661.79 | 1,321.57 | 0.00440  |
| 1509 | PE | PV | 100 µM | 512 | 521 | ALRADENyyK | y8: Phospho (+79.97), y9: Phospho (+79.97) | 99.70% | 0.97 | 15.6 | 1.15 | 2 | 701.78 | 1,401.54 | 0.00413  |
| 1510 | PE | PV | 100 µM | 512 | 521 | ALRADENyYK | y8: Phospho (+79.97)                       | 99.70% | 1.47 | 26   | 2.51 | 2 | 661.79 | 1,321.57 | 0.00294  |
| 1511 | PE | PV | 100 µM | 512 | 521 | ALRADENYyK | y9: Phospho (+79.97)                       | 99.70% | 1.49 | 12.3 | 4.38 | 3 | 441.53 | 1,321.57 | 0.00280  |
| 1512 | PE | PV | 100 µM | 512 | 521 | ALRADENyyK | y8: Phospho (+79.97), y9: Phospho (+79.97) | 99.70% | 1.75 | 26.3 | 1.74 | 2 | 701.78 | 1,401.54 | 0.00462  |
| 1513 | PE | PV | 100 µM | 512 | 521 | ALRADENYyK | y9: Phospho (+79.97)                       | 99.70% | 2.15 | 43.7 | 6.18 | 2 | 661.79 | 1,321.57 | -0.00109 |
| 1514 | PE | PV | 100 µM | 512 | 521 | ALRADENyyK | y8: Phospho (+79.97), y9: Phospho (+79.97) | 99.70% | 1.79 | 0    | 2.66 | 3 | 468.19 | 1,401.54 | 0.00421  |
| 1515 | PE | PV | 100 µM | 512 | 521 | ALRADENyyK | y8: Phospho (+79.97), y9: Phospho (+79.97) | 99.70% | 2.53 | 44.1 | 10.2 | 2 | 701.78 | 1,401.54 | 0.00377  |
| 1516 | PE | PV | 100 µM | 512 | 521 | ALRADENyYK | y8: Phospho (+79.97)                       | 99.70% | 3.32 | 35.2 | 13.9 | 2 | 661.79 | 1,321.58 | 0.00477  |

|      |    |    |        |     |     |                   |                                            |        |      |      |      |   |        |          |          |
|------|----|----|--------|-----|-----|-------------------|--------------------------------------------|--------|------|------|------|---|--------|----------|----------|
| 1517 | PE | PV | 100 µM | 512 | 521 | ALRADENyyK        | y8: Phospho (+79.97), y9: Phospho (+79.97) | 99.70% | 1.95 | 17.5 | 2.89 | 2 | 701.78 | 1,401.55 | 0.01695  |
| 1518 | PE | PV | 100 µM | 512 | 521 | ALRADENyyK        | y8: Phospho (+79.97), y9: Phospho (+79.97) | 99.70% | 1.78 | 18.5 | 4.38 | 2 | 701.79 | 1,401.56 | 0.02074  |
| 1519 | PE | PV | 100 µM | 512 | 521 | ALRADENyyK        | y8: Phospho (+79.97), y9: Phospho (+79.97) | 99.70% | 2.07 | 28.9 | 4.47 | 2 | 701.79 | 1,401.56 | 0.01988  |
| 1520 | PE | PV | 100 µM | 512 | 521 | ALRADENyyK        | y9: Phospho (+79.97)                       | 99.70% | 1.48 | 31.5 | 2.68 | 2 | 661.79 | 1,321.57 | -0.00427 |
| 1521 | PE | PV | 100 µM | 512 | 521 | ALRADENyyK        | y9: Phospho (+79.97)                       | 99.70% | 1.97 | 39.2 | 3.72 | 2 | 661.79 | 1,321.57 | -0.00036 |
| 1522 | PE | PV | 100 µM | 512 | 521 | ALRADENyyK        | y8: Phospho (+79.97)                       | 99.70% | 2.27 | 0    | 4.55 | 3 | 441.53 | 1,321.57 | 0.00088  |
| 1523 | IP | PV | 0      | 512 | 527 | ALRADENyyKAQTHGK  | y9: Phospho (+79.97)                       | 99.30% | 3.34 | 18.1 | 2.68 | 3 | 648.97 | 1,943.89 | 0.00273  |
| 1524 | PE | PV | 10 µM  | 512 | 527 | ALRADENyyKAQTHGK  | y8: Phospho (+79.97), y9: Phospho (+79.97) | 99.70% | 2.45 | 35.3 | 3.46 | 4 | 506.97 | 2,023.86 | 0.00049  |
| 1525 | PE | PV | 10 µM  | 512 | 527 | ALRADENyyKAQTHGK  | y8: Phospho (+79.97), y9: Phospho (+79.97) | 99.70% | 2.64 | 33.6 | 6.16 | 3 | 675.63 | 2,023.85 | -0.00145 |
| 1526 | PE | PV | 30 µM  | 512 | 527 | ALRADENyyKAQTHGK  | y8: Phospho (+79.97), y9: Phospho (+79.97) | 99.70% | 2.66 | 21.7 | 4.37 | 3 | 675.63 | 2,023.85 | -0.00181 |
| 1527 | PE | PV | 100 µM | 512 | 527 | ALRADENyyKAQTHGK  | y8: Phospho (+79.97), y9: Phospho (+79.97) | 99.70% | 3.13 | 26.6 | 5.66 | 3 | 675.63 | 2,023.86 | 0.00002  |
| 1528 | PE | Hg | 100 µM | 515 | 521 | ADENyyK           | y5: Phospho (+79.97)                       | 98.60% | 1.04 | 15.9 | 1.19 | 2 | 491.68 | 981.352  | 0.00368  |
| 1529 | PE | PV | 30 µM  | 515 | 521 | ADENyyK           | y5: Phospho (+79.97)                       | 98.80% | 1.02 | 27.1 | 0.51 | 2 | 491.68 | 981.349  | 0.00136  |
| 1530 | PE | PV | 30 µM  | 515 | 521 | ADENyyK           | y5: Phospho (+79.97)                       | 98.80% | 1.45 | 13.4 | 1.46 | 2 | 491.68 | 981.349  | 0.00087  |
| 1531 | PE | PV | 30 µM  | 515 | 521 | ADENyyK           | y6: Phospho (+79.97)                       | 98.80% | 1.5  | 22.1 | 3.82 | 2 | 491.68 | 981.349  | 0.00051  |
| 1532 | PE | PV | 100 µM | 515 | 521 | ADENyyK           | y6: Phospho (+79.97)                       | 98.30% | 2.15 | 10.1 | 0.55 | 2 | 491.68 | 981.351  | 0.00270  |
| 1533 | PE | PV | 100 µM | 515 | 521 | ADENyyK           | y6: Phospho (+79.97)                       | 98.80% | 1.58 | 44.8 | 3.24 | 2 | 491.68 | 981.348  | 0.00032  |
| 1534 | PE | PV | 100 µM | 515 | 521 | ADENyyK           | y6: Phospho (+79.97)                       | 98.80% | 1.64 | 23.2 | 4.64 | 2 | 491.68 | 981.349  | 0.00105  |
| 1535 | PE | PV | 30 µM  | 515 | 527 | ADENyyKAQTHGK     | y6: Phospho (+79.97)                       | 99.70% | 2.09 | 20.1 | 5.11 | 3 | 535.56 | 1,603.67 | -0.00160 |
| 1536 | PE | PV | 100 µM | 515 | 527 | ADENyyKAQTHGK     | y6: Phospho (+79.97)                       | 99.70% | 3.01 | 38.7 | 5.43 | 3 | 535.56 | 1,603.66 | -0.00416 |
| 1537 | PE | Ig | NT     | 515 | 531 | ADENyyKAQTHGKWPVK | y5: Phospho (+79.97), y6: Phospho (+79.97) | 99.70% | 2.73 | 47.1 | 0    | 3 | 732.32 | 2,193.93 | 0.00415  |
| 1538 | PE | Ig | 1 min  | 515 | 531 | ADENyyKAQTHGKWPVK | y5: Phospho (+79.97), y6: Phospho (+79.97) | 99.70% | 3.15 | 39.3 | 0    | 3 | 732.32 | 2,193.94 | 0.00671  |
| 1539 | PE | Ig | 2 min  | 515 | 531 | ADENyyKAQTHGKWPVK | y5: Phospho (+79.97), y6: Phospho (+79.97) | 86.40% | 1.69 | 0    | 0    | 4 | 549.49 | 2,193.94 | 0.00847  |
| 1540 | PE | Ig | 2 min  | 515 | 531 | ADENyyKAQTHGKWPVK | y5: Phospho (+79.97), y6: Phospho (+79.97) | 99.70% | 2.88 | 52.4 | 0    | 3 | 732.32 | 2,193.93 | 0.00378  |
| 1541 | PE | Ig | 3 min  | 515 | 531 | ADENyyKAQTHGKWPVK | y5: Phospho (+79.97), y6: Phospho (+79.97) | 99.70% | 3.38 | 35.9 | 0    | 3 | 732.32 | 2,193.93 | 0.00195  |
| 1542 | PE | Ig | 5 min  | 515 | 531 | ADENyyKAQTHGKWPVK | y5: Phospho (+79.97), y6: Phospho (+79.97) | 99.70% | 1.02 | 28.7 | 0    | 3 | 732.32 | 2,193.93 | 0.00360  |
| 1543 | PE | Ig | 15 min | 515 | 531 | ADENyyKAQTHGKWPVK | y5: Phospho (+79.97), y6: Phospho (+79.97) | 99.70% | 1.87 | 30.3 | 0    | 3 | 732.32 | 2,193.93 | 0.00543  |
| 1544 | PE | Hg | 0      | 515 | 531 | ADENyyKAQTHGKWPVK | y5: Phospho (+79.97), y6: Phospho (+79.97) | 99.70% | 1.51 | 37.5 | 2.59 | 3 | 732.32 | 2,193.93 | -0.00043 |
| 1545 | PE | Hg | 1 µM   | 515 | 531 | ADENyyKAQTHGKWPVK | y5: Phospho (+79.97), y6: Phospho (+79.97) | 99.70% | 1.82 | 48.4 | 1.74 | 3 | 732.32 | 2,193.93 | 0.00616  |

|      |    |    |        |     |     |                   |                                             |        |      |      |      |   |        |          |         |
|------|----|----|--------|-----|-----|-------------------|---------------------------------------------|--------|------|------|------|---|--------|----------|---------|
| 1546 | PE | Hg | 5 µM   | 515 | 531 | ADENyyKAQTHGKWPVK | y5: Phospho (+79.97), y6: Phospho (+79.97)  | 99.70% | 2.6  | 47   | 5.15 | 3 | 732.32 | 2,193.93 | 0.00525 |
| 1547 | PE | Hg | 10 µM  | 515 | 531 | ADENyyKAQTHGKWPVK | y5: Phospho (+79.97), y6: Phospho (+79.97)  | 99.70% | 1.91 | 27.8 | 0.96 | 3 | 732.32 | 2,193.93 | 0.00598 |
| 1548 | PE | Hg | 20 µM  | 515 | 531 | ADENyYKAQtHGKWPVK | y5: Phospho (+79.97), t10: Phospho (+79.97) | 99.70% | 1.15 | 29.2 | 0.68 | 3 | 732.32 | 2,193.94 | 0.00635 |
| 1549 | PE | Hg | 50 µM  | 515 | 531 | ADENyyKAQTHGKWPVK | y5: Phospho (+79.97), y6: Phospho (+79.97)  | 99.70% | 1.56 | 18.6 | 0.8  | 3 | 732.32 | 2,193.94 | 0.00909 |
| 1550 | PE | Hg | 100 µM | 515 | 531 | ADENyyKAQTHGKWPVK | y5: Phospho (+79.97), y6: Phospho (+79.97)  | 99.70% | 2.22 | 44.8 | 5.54 | 3 | 732.32 | 2,193.94 | 0.00690 |
| 1551 | PE | PV | 0      | 515 | 531 | ADENyyKAQTHGKWPVK | y5: Phospho (+79.97), y6: Phospho (+79.97)  | 98.30% | 1.68 | 0    | 0    | 4 | 549.49 | 2,193.93 | 0.00456 |
| 1552 | PE | PV | 1 µM   | 515 | 531 | ADENyyKAQTHGKWPVK | y5: Phospho (+79.97), y6: Phospho (+79.97)  | 99.70% | 2.88 | 32.5 | 7.8  | 3 | 732.32 | 2,193.93 | 0.00195 |
| 1553 | PE | PV | 3 µM   | 515 | 531 | ADENyyKAQTHGKWPVK | y5: Phospho (+79.97), y6: Phospho (+79.97)  | 99.40% | 1.33 | 12.4 | 0    | 4 | 549.49 | 2,193.94 | 0.00774 |
| 1554 | PE | PV | 3 µM   | 515 | 531 | ADENyyKAQTHGKWPVK | y5: Phospho (+79.97), y6: Phospho (+79.97)  | 99.70% | 1.51 | 19.8 | 1.15 | 3 | 732.32 | 2,193.93 | 0.00323 |
| 1555 | PE | PV | 10 µM  | 515 | 531 | ADENyyKAQTHGKWPVK | y5: Phospho (+79.97), y6: Phospho (+79.97)  | 98.70% | 1.02 | 24.2 | 0    | 3 | 732.32 | 2,193.93 | 0.00598 |
| 1556 | PE | PV | 10 µM  | 515 | 531 | ADENyyKAQTHGKWPVK | y5: Phospho (+79.97), y6: Phospho (+79.97)  | 99.70% | 1.93 | 38.2 | 6.39 | 3 | 732.32 | 2,193.93 | 0.00543 |
| 1557 | PE | PV | 10 µM  | 515 | 531 | ADENYYKAQtHGKWPVK | t10: Phospho (+79.97)                       | 99.70% | 2.52 | 34.3 | 8.27 | 3 | 705.66 | 2,113.97 | 0.00393 |
| 1558 | PE | PV | 10 µM  | 515 | 531 | ADENyyKAQTHGKWPVK | y5: Phospho (+79.97), y6: Phospho (+79.97)  | 99.70% | 2.76 | 24.6 | 5.8  | 4 | 549.49 | 2,193.93 | 0.00554 |
| 1559 | PE | PV | 10 µM  | 515 | 531 | ADENyyKAQTHGKWPVK | y5: Phospho (+79.97), y6: Phospho (+79.97)  | 99.70% | 3.14 | 33.6 | 2.89 | 3 | 732.32 | 2,193.93 | 0.00250 |
| 1560 | PE | PV | 30 µM  | 515 | 531 | ADENyYKAQtHGKWPVK | y6: Phospho (+79.97), t10: Phospho (+79.97) | 97.90% | 0    | 18.6 | 0.6  | 3 | 732.32 | 2,193.93 | 0.00140 |
| 1561 | PE | PV | 30 µM  | 515 | 531 | ADENyyKAQTHGKWPVK | y5: Phospho (+79.97), y6: Phospho (+79.97)  | 99.70% | 0    | 30.9 | 4.62 | 3 | 732.32 | 2,193.93 | 0.00030 |
| 1562 | PE | PV | 30 µM  | 515 | 531 | ADENyyKAQTHGKWPVK | y5: Phospho (+79.97), y6: Phospho (+79.97)  | 82.10% | 0.77 | 0    | 0    | 3 | 732.32 | 2,193.93 | 0.00030 |
| 1563 | PE | PV | 30 µM  | 515 | 531 | ADENyyKAQTHGKWPVK | y5: Phospho (+79.97), y6: Phospho (+79.97)  | 99.10% | 1.25 | 21.6 | 0    | 3 | 732.32 | 2,193.93 | 0.00580 |
| 1564 | PE | PV | 30 µM  | 515 | 531 | ADENyyKAQTHGKWPVK | y5: Phospho (+79.97), y6: Phospho (+79.97)  | 99.70% | 1.33 | 21.4 | 0    | 4 | 549.49 | 2,193.93 | 0.00505 |
| 1565 | PE | PV | 30 µM  | 515 | 531 | ADENyyKAQTHGKWPVK | y5: Phospho (+79.97), y6: Phospho (+79.97)  | 99.70% | 2.23 | 31.8 | 5.3  | 3 | 732.32 | 2,193.94 | 0.00909 |
| 1566 | PE | PV | 30 µM  | 515 | 531 | ADENyyKAQTHGKWPVK | y5: Phospho (+79.97), y6: Phospho (+79.97)  | 99.70% | 3.52 | 23.6 | 4.82 | 4 | 549.49 | 2,193.93 | 0.00554 |
| 1567 | PE | PV | 30 µM  | 515 | 531 | ADENyyKAQTHGKWPVK | y5: Phospho (+79.97), y6: Phospho (+79.97)  | 99.70% | 2.91 | 46.5 | 5.01 | 3 | 732.32 | 2,193.93 | 0.00378 |
| 1568 | PE | PV | 30 µM  | 515 | 531 | ADENyyKAQTHGKWPVK | y5: Phospho (+79.97), y6: Phospho (+79.97)  | 99.70% | 2.81 | 34.3 | 5.14 | 3 | 732.33 | 2,193.96 | 0.03491 |



|      |    |    |        |     |     |                   |                                             |        |      |      |      |   |        |          |          |
|------|----|----|--------|-----|-----|-------------------|---------------------------------------------|--------|------|------|------|---|--------|----------|----------|
| 1569 | PE | PV | 30 µM  | 515 | 531 | ADENyyKAQTHGKWPVK | y5: Phospho (+79.97), y6: Phospho (+79.97)  | 99.70% | 2.96 | 30.5 | 5.68 | 3 | 732.33 | 2,193.97 | 0.03802  |
| 1570 | PE | PV | 30 µM  | 515 | 531 | ADENyyKAQTHGKWPVK | y5: Phospho (+79.97), y6: Phospho (+79.97)  | 99.70% | 3    | 34.8 | 5.59 | 3 | 732.33 | 2,193.96 | 0.03052  |
| 1571 | PE | PV | 30 µM  | 515 | 531 | ADENyyKAQTHGKWPVK | y5: Phospho (+79.97), y6: Phospho (+79.97)  | 99.70% | 2.33 | 56.5 | 6.47 | 3 | 732.33 | 2,193.96 | 0.02704  |
| 1572 | PE | PV | 30 µM  | 515 | 531 | ADENyyKAQTHGKWPVK | y5: Phospho (+79.97), y6: Phospho (+79.97)  | 98.20% | 0.94 | 13.2 | 0    | 3 | 732.32 | 2,193.93 | 0.00269  |
| 1573 | PE | PV | 30 µM  | 515 | 531 | ADENyYKAQtHGKWPVK | y5: Phospho (+79.97), t10: Phospho (+79.97) | 99.60% | 0.74 | 15.4 | 0    | 3 | 732.32 | 2,193.93 | 0.00378  |
| 1574 | PE | PV | 100 µM | 515 | 531 | ADENyyKAQTHGKWPVK | y5: Phospho (+79.97), y6: Phospho (+79.97)  | 99.70% | 0    | 19.8 | 2.06 | 3 | 732.32 | 2,193.93 | 0.00232  |
| 1575 | PE | PV | 100 µM | 515 | 531 | ADENyYKAQtHGKWPVK | y5: Phospho (+79.97), t10: Phospho (+79.97) | 99.70% | 0.76 | 23   | 0    | 3 | 732.32 | 2,193.93 | -0.00189 |
| 1576 | PE | PV | 100 µM | 515 | 531 | ADENyyKAQTHGKWPVK | y5: Phospho (+79.97), y6: Phospho (+79.97)  | 99.00% | 1.03 | 26.1 | 0    | 3 | 732.32 | 2,193.94 | 0.00726  |
| 1577 | PE | PV | 100 µM | 515 | 531 | ADENyYKAQtHGKWPVK | y5: Phospho (+79.97), t10: Phospho (+79.97) | 99.40% | 1.03 | 19.6 | 0    | 3 | 732.32 | 2,193.93 | 0.00287  |
| 1578 | PE | PV | 100 µM | 515 | 531 | ADENyyKAQTHGKWPVK | y6: Phospho (+79.97)                        | 99.70% | 1.43 | 26.3 | 3.06 | 3 | 705.66 | 2,113.96 | 0.00246  |
| 1579 | PE | PV | 100 µM | 515 | 531 | ADENyyKAQTHGKWPVK | y5: Phospho (+79.97), y6: Phospho (+79.97)  | 99.70% | 2.51 | 39   | 6.07 | 3 | 732.32 | 2,193.94 | 0.00671  |
| 1580 | PE | PV | 100 µM | 515 | 531 | ADENyyKAQTHGKWPVK | y5: Phospho (+79.97), y6: Phospho (+79.97)  | 99.70% | 2.63 | 30   | 3.35 | 4 | 549.49 | 2,193.93 | 0.00481  |
| 1581 | PE | PV | 100 µM | 515 | 531 | ADENyyKAQTHGKWPVK | y5: Phospho (+79.97), y6: Phospho (+79.97)  | 99.70% | 3.63 | 45.8 | 9.82 | 3 | 732.32 | 2,193.93 | 0.00525  |
| 1582 | PE | PV | 100 µM | 515 | 531 | ADENyyKAQTHGKWPVK | y5: Phospho (+79.97), y6: Phospho (+79.97)  | 99.70% | 3.08 | 56.1 | 3.29 | 3 | 732.33 | 2,193.96 | 0.03564  |
| 1583 | PE | PV | 100 µM | 515 | 531 | ADENyyKAQTHGKWPVK | y5: Phospho (+79.97), y6: Phospho (+79.97)  | 99.70% | 3.36 | 28.3 | 4.57 | 3 | 732.33 | 2,193.96 | 0.02869  |
| 1584 | PE | PV | 100 µM | 515 | 531 | ADENyyKAQTHGKWPVK | y5: Phospho (+79.97), y6: Phospho (+79.97)  | 99.70% | 3.11 | 48.6 | 6.64 | 3 | 732.33 | 2,193.96 | 0.03418  |
| 1585 | PE | PV | 100 µM | 515 | 531 | ADENyyKAQTHGKWPVK | y5: Phospho (+79.97), y6: Phospho (+79.97)  | 99.40% | 0.9  | 15   | 0    | 3 | 732.32 | 2,193.93 | 0.00104  |
| 1586 | PE | PV | 100 µM | 515 | 531 | ADENyYKAQTHGKWPVK | y5: Phospho (+79.97)                        | 99.50% | 0.81 | 10.5 | 0.64 | 3 | 705.66 | 2,113.96 | 0.00027  |
| 1587 | PE | PV | 100 µM | 515 | 531 | ADENyYKAQtHGKWPVK | t10: Phospho (+79.97)                       | 99.70% | 0.88 | 29   | 1.68 | 3 | 705.66 | 2,113.96 | -0.00102 |
| 1588 | PE | PV | 100 µM | 515 | 531 | ADENyyKAQTHGKWPVK | y5: Phospho (+79.97), y6: Phospho (+79.97)  | 99.70% | 2.1  | 16.3 | 3.31 | 3 | 732.32 | 2,193.93 | -0.00024 |
| 1589 | PE | Ig | NT     | 620 | 629 | LRNyYDVVN         | y5: Phospho (+79.97)                        | 98.00% | 1.29 | 28.3 | 0    | 2 | 699.81 | 1,397.61 | 0.00531  |
| 1590 | PE | Ig | 1 min  | 620 | 629 | LRNyYDVVN         | y5: Phospho (+79.97)                        | 99.70% | 1.14 | 12   | 3    | 2 | 699.81 | 1,397.60 | 0.00079  |
| 1591 | PE | Ig | 1 min  | 620 | 629 | LRNyYDVVN         | y5: Phospho (+79.97)                        | 99.70% | 1.7  | 26.2 | 2.51 | 2 | 699.81 | 1,397.60 | 0.00140  |
| 1592 | PE | Ig | 1 min  | 620 | 629 | LRNyYDVVN         | y5: Phospho (+79.97)                        | 99.70% | 2.43 | 48.1 | 0    | 2 | 699.81 | 1,397.61 | 0.00604  |
| 1593 | PE | Ig | 1 min  | 620 | 629 | LRNyYDVVN         | y5: Phospho (+79.97)                        | 99.70% | 1.54 | 21.2 | 2.62 | 2 | 699.82 | 1,397.62 | 0.01825  |
| 1594 | PE | Ig | 2 min  | 620 | 629 | LRNyYDVVN         | y6: Phospho (+79.97)                        | 99.10% | 1.31 | 24.4 | 2.29 | 2 | 699.81 | 1,397.61 | 0.00348  |
| 1595 | PE | Ig | 2 min  | 620 | 629 | LRNyYDVVN         | y5: Phospho (+79.97)                        | 99.60% | 0.89 | 17.9 | 0.43 | 2 | 699.81 | 1,397.61 | 0.00494  |
| 1596 | PE | Ig | 2 min  | 620 | 629 | LRNyYDVVN         | y5: Phospho (+79.97)                        | 99.70% | 1.71 | 11.9 | 2.89 | 2 | 699.81 | 1,397.60 | 0.00250  |

|      |    |    |        |     |     |            |                      |        |      |      |      |   |        |          |          |
|------|----|----|--------|-----|-----|------------|----------------------|--------|------|------|------|---|--------|----------|----------|
| 1597 | PE | Ig | 2 min  | 620 | 629 | LRNYyYDVVN | y5: Phospho (+79.97) | 99.70% | 1.72 | 31.6 | 2.08 | 2 | 699.81 | 1,397.60 | 0.00286  |
| 1598 | PE | Ig | 2 min  | 620 | 629 | LRNYyYDVVN | y5: Phospho (+79.97) | 99.70% | 2.17 | 35.5 | 4.02 | 2 | 699.81 | 1,397.60 | 0.00140  |
| 1599 | PE | Ig | 2 min  | 620 | 629 | LRNYyYDVVN | y6: Phospho (+79.97) | 97.60% | 0.5  | 21.8 | 0    | 2 | 699.81 | 1,397.61 | 0.00775  |
| 1600 | PE | Ig | 2 min  | 620 | 629 | LRNYyYDVVN | y5: Phospho (+79.97) | 99.70% | 2.24 | 47.2 | 0    | 2 | 699.81 | 1,397.61 | 0.00592  |
| 1601 | PE | Ig | 3 min  | 620 | 629 | LRNYyYDVVN | y5: Phospho (+79.97) | 98.60% | 1.52 | 24.5 | 2.16 | 2 | 699.81 | 1,397.61 | 0.00567  |
| 1602 | PE | Ig | 3 min  | 620 | 629 | LRNYyYDVVN | y5: Phospho (+79.97) | 99.60% | 1.31 | 15.9 | 2.12 | 2 | 699.81 | 1,397.60 | 0.00274  |
| 1603 | PE | Ig | 3 min  | 620 | 629 | LRNYyYDVVN | y6: Phospho (+79.97) | 99.70% | 1.26 | 12.6 | 4    | 2 | 699.81 | 1,397.61 | 0.00409  |
| 1604 | PE | Ig | 3 min  | 620 | 629 | LRNYyYDVVN | y5: Phospho (+79.97) | 99.70% | 2.21 | 31.9 | 3.44 | 2 | 699.81 | 1,397.60 | 0.00201  |
| 1605 | PE | Ig | 3 min  | 620 | 629 | LRNYyYDVVN | y5: Phospho (+79.97) | 99.70% | 1.5  | 29.1 | 0    | 2 | 699.81 | 1,397.60 | -0.00080 |
| 1606 | PE | Ig | 3 min  | 620 | 629 | LRNYyYDVVN | y5: Phospho (+79.97) | 99.70% | 2.23 | 23.5 | 4.11 | 2 | 699.81 | 1,397.60 | -0.00043 |
| 1607 | PE | Ig | 3 min  | 620 | 629 | LRNYyYDVVN | y4: Phospho (+79.97) | 85.20% | 0.5  | 0    | 0    | 2 | 699.81 | 1,397.60 | 0.00335  |
| 1608 | PE | Ig | 3 min  | 620 | 629 | LRNYyYDVVN | y5: Phospho (+79.97) | 99.70% | 2.22 | 44.6 | 0    | 2 | 699.81 | 1,397.61 | 0.00604  |
| 1609 | PE | Ig | 3 min  | 620 | 629 | LRNYyYDVVN | y5: Phospho (+79.97) | 99.70% | 1.89 | 24.7 | 3.39 | 2 | 699.82 | 1,397.62 | 0.02044  |
| 1610 | PE | Ig | 5 min  | 620 | 629 | LRNYyYDVVN | y5: Phospho (+79.97) | 97.00% | 1.39 | 10.4 | 0    | 2 | 699.81 | 1,397.60 | 0.00189  |
| 1611 | PE | Ig | 5 min  | 620 | 629 | LRNYyYDVVN | y5: Phospho (+79.97) | 99.70% | 1.92 | 23.2 | 2.92 | 2 | 699.81 | 1,397.61 | 0.00396  |
| 1612 | PE | Ig | 5 min  | 620 | 629 | LRNYyYDVVN | y5: Phospho (+79.97) | 99.70% | 1.84 | 15.2 | 3.47 | 2 | 699.81 | 1,397.60 | 0.00250  |
| 1613 | PE | Ig | 5 min  | 620 | 629 | LRNYyYDVVN | y5: Phospho (+79.97) | 99.70% | 2.6  | 35.1 | 4.46 | 2 | 699.81 | 1,397.60 | 0.00274  |
| 1614 | PE | Ig | 5 min  | 620 | 629 | LRNYyYDVVN | y5: Phospho (+79.97) | 83.50% | 0.5  | 0    | 0    | 2 | 699.81 | 1,397.60 | 0.00018  |
| 1615 | PE | Ig | 5 min  | 620 | 629 | LRNYyYDVVN | y5: Phospho (+79.97) | 94.60% | 0.75 | 25.6 | 0    | 2 | 699.81 | 1,397.61 | 0.00531  |
| 1616 | PE | Ig | 5 min  | 620 | 629 | LRNYyYDVVN | y5: Phospho (+79.97) | 99.70% | 2.39 | 34.7 | 4.01 | 2 | 699.81 | 1,397.60 | 0.00238  |
| 1617 | PE | Ig | 5 min  | 620 | 629 | LRNYyYDVVN | y6: Phospho (+79.97) | 99.70% | 1.47 | 32.4 | 0    | 2 | 699.81 | 1,397.61 | 0.00689  |
| 1618 | PE | Ig | 5 min  | 620 | 629 | LRNYyYDVVN | y5: Phospho (+79.97) | 99.70% | 2.67 | 44.7 | 0    | 2 | 699.81 | 1,397.61 | 0.00518  |
| 1619 | PE | Ig | 5 min  | 620 | 629 | LRNYyYDVVN | y4: Phospho (+79.97) | 99.70% | 1.16 | 12   | 2.11 | 2 | 699.82 | 1,397.62 | 0.01788  |
| 1620 | PE | Ig | 5 min  | 620 | 629 | LRNYyYDVVN | y5: Phospho (+79.97) | 99.70% | 1.58 | 16.3 | 3.1  | 2 | 699.82 | 1,397.62 | 0.01934  |
| 1621 | PE | Ig | 5 min  | 620 | 629 | LRNYyYDVVN | y6: Phospho (+79.97) | 98.90% | 0.98 | 31.2 | 0    | 2 | 699.81 | 1,397.60 | 0.00042  |
| 1622 | PE | Ig | 15 min | 620 | 629 | LRNYyYDVVN | y5: Phospho (+79.97) | 87.30% | 1.3  | 0    | 2.68 | 2 | 699.81 | 1,397.60 | 0.00238  |
| 1623 | PE | Ig | 15 min | 620 | 629 | LRNYyYDVVN | y5: Phospho (+79.97) | 99.40% | 1.83 | 12.9 | 2.13 | 2 | 699.81 | 1,397.60 | 0.00311  |
| 1624 | PE | Ig | 15 min | 620 | 629 | LRNYyYDVVN | y5: Phospho (+79.97) | 99.70% | 1.73 | 29.1 | 0    | 2 | 699.81 | 1,397.60 | -0.00116 |
| 1625 | PE | Ig | 15 min | 620 | 629 | LRNYyYDVVN | y5: Phospho (+79.97) | 99.70% | 1.34 | 24.5 | 3.42 | 2 | 699.81 | 1,397.60 | 0.00213  |
| 1626 | PE | Ig | 15 min | 620 | 629 | LRNYyYDVVN | y5: Phospho (+79.97) | 99.70% | 1.94 | 42.1 | 4.85 | 2 | 699.81 | 1,397.60 | 0.00030  |
| 1627 | PE | Ig | 15 min | 620 | 629 | LRNYyYDVVN | y5: Phospho (+79.97) | 97.80% | 1.46 | 25.8 | 0    | 2 | 699.81 | 1,397.61 | 0.00653  |
| 1628 | PE | Ig | 15 min | 620 | 629 | LRNYyYDVVN | y5: Phospho (+79.97) | 99.70% | 2.59 | 38.4 | 0    | 2 | 699.81 | 1,397.61 | 0.00616  |
| 1629 | PE | Hg | 0      | 620 | 629 | LRNYyYDVVN | y5: Phospho (+79.97) | 99.70% | 1.31 | 17.3 | 0    | 2 | 699.81 | 1,397.60 | 0.00335  |
| 1630 | PE | Hg | 0      | 620 | 629 | LRNYyYDVVN | y5: Phospho (+79.97) | 99.70% | 1.17 | 26.3 | 0.62 | 2 | 699.81 | 1,397.61 | 0.00677  |
| 1631 | PE | Hg | 1 µM   | 620 | 629 | LRNYyYDVVN | y5: Phospho (+79.97) | 99.70% | 1.67 | 28.5 | 2.96 | 2 | 699.81 | 1,397.60 | -0.00263 |
| 1632 | PE | Hg | 1 µM   | 620 | 629 | LRNYyYDVVN | y6: Phospho (+79.97) | 88.20% | 0.63 | 15.3 | 0    | 2 | 699.81 | 1,397.61 | 0.00702  |
| 1633 | PE | Hg | 5 µM   | 620 | 629 | LRNYyYDVVN | y5: Phospho (+79.97) | 99.70% | 1.54 | 31.8 | 0    | 2 | 699.81 | 1,397.60 | -0.00104 |
| 1634 | PE | Hg | 5 µM   | 620 | 629 | LRNYyYDVVN | y5: Phospho (+79.97) | 99.70% | 1.88 | 43.5 | 2.96 | 2 | 699.81 | 1,397.61 | 0.00738  |
| 1635 | PE | Hg | 10 µM  | 620 | 629 | LRNYyYDVVN | y5: Phospho (+79.97) | 99.70% | 2.01 | 60.5 | 1.74 | 2 | 699.81 | 1,397.60 | -0.00141 |
| 1636 | PE | Hg | 20 µM  | 620 | 629 | LRNYyYDVVN | y6: Phospho (+79.97) | 99.70% | 1.51 | 39.4 | 2    | 2 | 699.81 | 1,397.61 | 0.00665  |
| 1637 | PE | Hg | 50 µM  | 620 | 629 | LRNYyYDVVN | y5: Phospho (+79.97) | 99.70% | 1.6  | 43.2 | 4.3  | 2 | 699.81 | 1,397.61 | 0.00982  |
| 1638 | PE | Hg | 100 µM | 620 | 629 | LRNYyYDVVN | y4: Phospho (+79.97) | 92.00% | 1.8  | 12.1 | 0    | 2 | 699.81 | 1,397.61 | 0.00665  |
| 1639 | PE | Hg | 100 µM | 620 | 629 | LRNYyYDVVN | y5: Phospho (+79.97) | 99.70% | 1.2  | 19.1 | 1.55 | 2 | 699.81 | 1,397.61 | 0.00702  |
| 1640 | PE | Hg | 100 µM | 620 | 629 | LRNYyYDVVN | y5: Phospho (+79.97) | 99.70% | 1.49 | 29.1 | 1.8  | 2 | 699.81 | 1,397.61 | 0.00775  |
| 1641 | PE | PV | 0      | 620 | 629 | LRNYyYDVVN | y6: Phospho (+79.97) | 99.70% | 1.56 | 73.5 | 4.27 | 2 | 699.81 | 1,397.61 | 0.00677  |

|      |    |    |       |     |     |            |                                            |        |      |      |      |   |        |          |          |
|------|----|----|-------|-----|-----|------------|--------------------------------------------|--------|------|------|------|---|--------|----------|----------|
| 1642 | PE | PV | 1 µM  | 620 | 629 | LRNYyYDVVN | y5: Phospho (+79.97)                       | 99.70% | 1.43 | 42.3 | 1.17 | 2 | 699.81 | 1,397.60 | -0.00165 |
| 1643 | PE | PV | 1 µM  | 620 | 629 | LRNYyYDVVN | y5: Phospho (+79.97)                       | 99.70% | 1.8  | 30.7 | 1.11 | 2 | 699.81 | 1,397.61 | 0.00738  |
| 1644 | PE | PV | 3 µM  | 620 | 629 | LRNYyYDVVN | y4: Phospho (+79.97)                       | 99.70% | 1.16 | 21.9 | 0    | 2 | 699.81 | 1,397.60 | -0.00165 |
| 1645 | PE | PV | 3 µM  | 620 | 629 | LRNYyYDVVN | y5: Phospho (+79.97)                       | 99.70% | 1.8  | 42.2 | 3.32 | 2 | 699.81 | 1,397.61 | 0.00726  |
| 1646 | PE | PV | 10 µM | 620 | 629 | LRNYyYDVVN | y6: Phospho (+79.97)                       | 98.80% | 1.83 | 23.3 | 0    | 2 | 699.81 | 1,397.60 | 0.00299  |
| 1647 | PE | PV | 10 µM | 620 | 629 | LRNYyYDVVN | y5: Phospho (+79.97), y6: Phospho (+79.97) | 90.10% | 1.11 | 22.3 | 1.08 | 2 | 739.79 | 1,477.57 | 0.00187  |
| 1648 | PE | PV | 10 µM | 620 | 629 | LRNYyYDVVN | y5: Phospho (+79.97)                       | 99.70% | 1.96 | 38.1 | 2.57 | 2 | 699.81 | 1,397.60 | 0.00189  |
| 1649 | PE | PV | 10 µM | 620 | 629 | LRNYyYDVVN | y6: Phospho (+79.97)                       | 99.50% | 1.54 | 20.9 | 2.51 | 2 | 699.81 | 1,397.60 | 0.00323  |
| 1650 | PE | PV | 10 µM | 620 | 629 | LRNYyYDVVN | y5: Phospho (+79.97)                       | 99.70% | 1.16 | 20.2 | 3.33 | 2 | 699.81 | 1,397.61 | 0.00433  |
| 1651 | PE | PV | 10 µM | 620 | 629 | LRNYyYDVVN | y5: Phospho (+79.97)                       | 99.70% | 2.03 | 34.2 | 4.23 | 2 | 699.81 | 1,397.60 | 0.00164  |
| 1652 | PE | PV | 10 µM | 620 | 629 | LRNYyYDVVN | y5: Phospho (+79.97)                       | 99.70% | 2.15 | 35.5 | 4.72 | 2 | 699.81 | 1,397.60 | 0.00274  |
| 1653 | PE | PV | 10 µM | 620 | 629 | LRNYyYDVVN | y5: Phospho (+79.97)                       | 99.70% | 2.23 | 34.1 | 4.66 | 2 | 699.81 | 1,397.60 | 0.00177  |
| 1654 | PE | PV | 10 µM | 620 | 629 | LRNYyYDVVN | y5: Phospho (+79.97)                       | 99.70% | 1.41 | 31.5 | 1.11 | 2 | 699.81 | 1,397.60 | 0.00299  |
| 1655 | PE | PV | 10 µM | 620 | 629 | LRNYyYDVVN | y5: Phospho (+79.97)                       | 99.70% | 1.53 | 27.8 | 1.42 | 2 | 699.81 | 1,397.60 | 0.00055  |
| 1656 | PE | PV | 10 µM | 620 | 629 | LRNYyYDVVN | y6: Phospho (+79.97)                       | 99.70% | 1.63 | 36   | 0.89 | 2 | 699.81 | 1,397.60 | 0.00030  |
| 1657 | PE | PV | 10 µM | 620 | 629 | LRNYyYDVVN | y5: Phospho (+79.97)                       | 99.40% | 1.48 | 11.8 | 1.82 | 2 | 699.81 | 1,397.60 | -0.00336 |
| 1658 | PE | PV | 10 µM | 620 | 629 | LRNYyYDVVN | y5: Phospho (+79.97)                       | 99.70% | 2.69 | 37.6 | 3.55 | 2 | 699.81 | 1,397.60 | -0.00007 |
| 1659 | PE | PV | 10 µM | 620 | 629 | LRNYyYDVVN | y5: Phospho (+79.97)                       | 99.70% | 2.2  | 19.2 | 4    | 2 | 699.81 | 1,397.60 | -0.00092 |
| 1660 | PE | PV | 10 µM | 620 | 629 | LRNYyYDVVN | y5: Phospho (+79.97)                       | 99.70% | 2.02 | 36   | 4.92 | 2 | 699.81 | 1,397.60 | 0.00103  |
| 1661 | PE | PV | 10 µM | 620 | 629 | LRNYyYDVVN | y5: Phospho (+79.97)                       | 99.70% | 2.62 | 39.6 | 3.85 | 2 | 699.81 | 1,397.60 | 0.00006  |
| 1662 | PE | PV | 10 µM | 620 | 629 | LRNYyYDVVN | y5: Phospho (+79.97)                       | 99.70% | 1.83 | 54.9 | 4.48 | 2 | 699.81 | 1,397.61 | 0.00640  |
| 1663 | PE | PV | 10 µM | 620 | 629 | LRNYyYDVVN | y6: Phospho (+79.97)                       | 99.70% | 1.6  | 43.9 | 2.66 | 2 | 699.81 | 1,397.61 | 0.00640  |
| 1664 | PE | PV | 10 µM | 620 | 629 | LRNYyYDVVN | y5: Phospho (+79.97)                       | 99.70% | 2.62 | 52.2 | 4.68 | 2 | 699.81 | 1,397.61 | 0.00628  |
| 1665 | PE | PV | 10 µM | 620 | 629 | LRNYyYDVVN | y5: Phospho (+79.97)                       | 99.30% | 1.86 | 34.3 | 2.32 | 2 | 699.82 | 1,397.63 | 0.02581  |
| 1666 | PE | PV | 10 µM | 620 | 629 | LRNYyYDVVN | y5: Phospho (+79.97), y6: Phospho (+79.97) | 99.70% | 0    | 13.7 | 2.22 | 2 | 739.80 | 1,477.59 | 0.02213  |
| 1667 | PE | PV | 10 µM | 620 | 629 | LRNYyYDVVN | y5: Phospho (+79.97)                       | 99.70% | 1.44 | 15.9 | 2.55 | 2 | 699.82 | 1,397.62 | 0.02056  |
| 1668 | PE | PV | 10 µM | 620 | 629 | LRNYyYDVVN | y5: Phospho (+79.97)                       | 99.70% | 1.46 | 22.5 | 2.89 | 2 | 699.82 | 1,397.62 | 0.02252  |
| 1669 | PE | PV | 10 µM | 620 | 629 | LRNYyYDVVN | y5: Phospho (+79.97)                       | 99.70% | 1.81 | 34.4 | 3.1  | 2 | 699.82 | 1,397.62 | 0.02203  |
| 1670 | PE | PV | 10 µM | 620 | 629 | LRNYyYDVVN | y4: Phospho (+79.97)                       | 99.70% | 1.25 | 27.2 | 3.04 | 2 | 699.82 | 1,397.62 | 0.02069  |
| 1671 | PE | PV | 10 µM | 620 | 629 | LRNYyYDVVN | y5: Phospho (+79.97)                       | 99.70% | 1.86 | 27.8 | 3.32 | 2 | 699.82 | 1,397.62 | 0.02154  |
| 1672 | PE | PV | 30 µM | 620 | 629 | LRNYyYDVVN | y5: Phospho (+79.97), y6: Phospho (+79.97) | 99.20% | 1.24 | 33   | 2.47 | 2 | 739.79 | 1,477.57 | 0.00333  |
| 1673 | PE | PV | 30 µM | 620 | 629 | LRNYyYDVVN | y5: Phospho (+79.97), y6: Phospho (+79.97) | 99.30% | 1.66 | 27.8 | 2.17 | 2 | 739.79 | 1,477.57 | 0.00162  |
| 1674 | PE | PV | 30 µM | 620 | 629 | LRNYyYDVVN | y5: Phospho (+79.97)                       | 99.70% | 1.49 | 32.2 | 2.96 | 2 | 699.81 | 1,397.60 | 0.00225  |
| 1675 | PE | PV | 30 µM | 620 | 629 | LRNYyYDVVN | y5: Phospho (+79.97)                       | 99.70% | 2.04 | 33.1 | 3.15 | 2 | 699.81 | 1,397.60 | 0.00189  |
| 1676 | PE | PV | 30 µM | 620 | 629 | LRNYyYDVVN | y5: Phospho (+79.97)                       | 99.70% | 1.99 | 34.5 | 4.48 | 2 | 699.81 | 1,397.61 | 0.00445  |
| 1677 | PE | PV | 30 µM | 620 | 629 | LRNYyYDVVN | y5: Phospho (+79.97)                       | 99.70% | 2.31 | 32.1 | 4.57 | 2 | 699.81 | 1,397.60 | 0.00323  |
| 1678 | PE | PV | 30 µM | 620 | 629 | LRNYyYDVVN | y6: Phospho (+79.97)                       | 99.70% | 1.93 | 28.2 | 1.31 | 2 | 699.81 | 1,397.60 | -0.00104 |
| 1679 | PE | PV | 30 µM | 620 | 629 | LRNYyYDVVN | y5: Phospho (+79.97)                       | 99.70% | 2.56 | 43.2 | 3.62 | 2 | 699.81 | 1,397.60 | 0.00299  |
| 1680 | PE | PV | 30 µM | 620 | 629 | LRNYyYDVVN | y5: Phospho (+79.97)                       | 99.70% | 2.72 | 36   | 3.31 | 2 | 699.81 | 1,397.60 | 0.00103  |
| 1681 | PE | PV | 30 µM | 620 | 629 | LRNYyYDVVN | y5: Phospho (+79.97)                       | 99.70% | 2.3  | 31.9 | 3.96 | 2 | 699.81 | 1,397.60 | -0.00092 |
| 1682 | PE | PV | 30 µM | 620 | 629 | LRNYyYDVVN | y5: Phospho (+79.97)                       | 99.70% | 1.8  | 25.4 | 4.21 | 2 | 699.81 | 1,397.60 | -0.00007 |

|      |    |    |        |     |     |            |                      |        |      |      |      |   |        |          |          |
|------|----|----|--------|-----|-----|------------|----------------------|--------|------|------|------|---|--------|----------|----------|
| 1683 | PE | PV | 30 μM  | 620 | 629 | LRNYyYDVVN | y5: Phospho (+79.97) | 99.70% | 2.87 | 39   | 4.72 | 2 | 699.81 | 1,397.60 | -0.00007 |
| 1684 | PE | PV | 30 μM  | 620 | 629 | LRNYyYDVVN | y5: Phospho (+79.97) | 99.70% | 1.9  | 35   | 2.05 | 2 | 699.81 | 1,397.61 | 0.00677  |
| 1685 | PE | PV | 30 μM  | 620 | 629 | LRNYyYDVVN | y6: Phospho (+79.97) | 99.70% | 2.32 | 35.8 | 2.08 | 2 | 699.81 | 1,397.60 | 0.00067  |
| 1686 | PE | PV | 30 μM  | 620 | 629 | LRNYyYDVVN | y5: Phospho (+79.97) | 99.70% | 2.48 | 38.4 | 3.36 | 2 | 699.81 | 1,397.61 | 0.00592  |
| 1687 | PE | PV | 30 μM  | 620 | 629 | LRNYyYDVVN | y5: Phospho (+79.97) | 99.70% | 1.74 | 28.1 | 2.57 | 2 | 699.82 | 1,397.62 | 0.01971  |
| 1688 | PE | PV | 30 μM  | 620 | 629 | LRNYyYDVVN | y5: Phospho (+79.97) | 99.70% | 1.66 | 42   | 2.68 | 2 | 699.82 | 1,397.62 | 0.01812  |
| 1689 | PE | PV | 30 μM  | 620 | 629 | LRNYyYDVVN | y5: Phospho (+79.97) | 99.70% | 2.07 | 16   | 2.64 | 2 | 699.82 | 1,397.62 | 0.01666  |
| 1690 | PE | PV | 30 μM  | 620 | 629 | LRNYyYDVVN | y5: Phospho (+79.97) | 99.70% | 1.77 | 29.5 | 3.28 | 2 | 699.82 | 1,397.62 | 0.02020  |
| 1691 | PE | PV | 30 μM  | 620 | 629 | LRNYyYDVVN | y5: Phospho (+79.97) | 99.70% | 1.92 | 31.2 | 4.09 | 2 | 699.82 | 1,397.62 | 0.01934  |
| 1692 | PE | PV | 30 μM  | 620 | 629 | LRNYyYDVVN | y5: Phospho (+79.97) | 99.60% | 1.45 | 23.9 | 0.77 | 2 | 699.81 | 1,397.60 | 0.00238  |
| 1693 | PE | PV | 100 μM | 620 | 629 | LRNYyYDVVN | y6: Phospho (+79.97) | 95.60% | 1.61 | 12.2 | 0    | 2 | 699.81 | 1,397.60 | 0.00055  |
| 1694 | PE | PV | 100 μM | 620 | 629 | LRNYyYDVVN | y5: Phospho (+79.97) | 99.50% | 0.68 | 14.2 | 1.26 | 2 | 699.81 | 1,397.60 | 0.00299  |
| 1695 | PE | PV | 100 μM | 620 | 629 | LRNYyYDVVN | y5: Phospho (+79.97) | 99.70% | 1.54 | 13   | 2.54 | 2 | 699.81 | 1,397.60 | 0.00164  |
| 1696 | PE | PV | 100 μM | 620 | 629 | LRNYyYDVVN | y5: Phospho (+79.97) | 99.70% | 2.15 | 32.3 | 4.28 | 2 | 699.81 | 1,397.61 | 0.00409  |
| 1697 | PE | PV | 100 μM | 620 | 629 | LRNYyYDVVN | y5: Phospho (+79.97) | 99.70% | 2.04 | 22.7 | 4.11 | 2 | 699.81 | 1,397.60 | 0.00152  |
| 1698 | PE | PV | 100 μM | 620 | 629 | LRNYyYDVVN | y6: Phospho (+79.97) | 99.60% | 1.22 | 10.7 | 1.14 | 2 | 699.81 | 1,397.60 | -0.00153 |
| 1699 | PE | PV | 100 μM | 620 | 629 | LRNYyYDVVN | y5: Phospho (+79.97) | 99.70% | 2.01 | 36.3 | 2.8  | 2 | 699.81 | 1,397.61 | 0.00360  |
| 1700 | PE | PV | 100 μM | 620 | 629 | LRNYyYDVVN | y5: Phospho (+79.97) | 99.70% | 1.81 | 25.4 | 4.1  | 2 | 699.81 | 1,397.60 | 0.00030  |
| 1701 | PE | PV | 100 μM | 620 | 629 | LRNYyYDVVN | y5: Phospho (+79.97) | 99.70% | 2.5  | 34.8 | 4.68 | 2 | 699.81 | 1,397.60 | -0.00043 |
| 1702 | PE | PV | 100 μM | 620 | 629 | LRNYyYDVVN | y5: Phospho (+79.97) | 99.70% | 2.78 | 30   | 5.37 | 2 | 699.81 | 1,397.60 | -0.00043 |
| 1703 | PE | PV | 100 μM | 620 | 629 | LRNYyYDVVN | y5: Phospho (+79.97) | 99.70% | 1.59 | 29   | 0.82 | 2 | 699.81 | 1,397.61 | 0.00750  |
| 1704 | PE | PV | 100 μM | 620 | 629 | LRNYyYDVVN | y6: Phospho (+79.97) | 99.70% | 1.86 | 45.5 | 3.34 | 2 | 699.81 | 1,397.60 | 0.00018  |
| 1705 | PE | PV | 100 μM | 620 | 629 | LRNYyYDVVN | y5: Phospho (+79.97) | 99.70% | 2.65 | 46.7 | 4.28 | 2 | 699.81 | 1,397.61 | 0.00518  |
| 1706 | PE | PV | 100 μM | 620 | 629 | LRNYyYDVVN | y5: Phospho (+79.97) | 99.70% | 1.68 | 24.1 | 2.55 | 2 | 699.82 | 1,397.62 | 0.02117  |
| 1707 | PE | PV | 100 μM | 620 | 629 | LRNYyYDVVN | y5: Phospho (+79.97) | 99.70% | 1.82 | 19.1 | 2.96 | 2 | 699.82 | 1,397.62 | 0.01898  |
| 1708 | PE | PV | 100 μM | 620 | 629 | LRNYyYDVVN | y5: Phospho (+79.97) | 99.70% | 1.74 | 23.4 | 3.55 | 2 | 699.82 | 1,397.62 | 0.02008  |
| 1709 | PE | PV | 100 μM | 620 | 629 | LRNYyYDVVN | y5: Phospho (+79.97) | 99.70% | 1.31 | 34.5 | 0.72 | 2 | 699.81 | 1,397.60 | -0.00141 |
| 1710 | PE | Ig | 5 min  | 622 | 629 | NYyYDVVN   | y3: Phospho (+79.97) | 86.70% | 0.98 | 0    | 0    | 2 | 565.22 | 1,128.42 | 0.00191  |
| 1711 | PE | Ig | 15 min | 622 | 629 | NYyYDVVN   | y3: Phospho (+79.97) | 98.80% | 0.94 | 15.9 | 0    | 2 | 565.22 | 1,128.42 | 0.00203  |

<sup>1</sup>PE = phosphopeptide enrichment, experiments were performed as either titanium dioxide or anti-pY pull-downs; IP = anti-SYK immunoprecipitation.

<sup>2</sup>NT = no treatment; Ig = anti-Ig activating antibody; Hg = mercury; PV = pervanadate.

<sup>3</sup>Lower case letters represent modified amino acid residues.
